# Supplementary material
Source: publisher figshare collection journal article supplement (https://rs.figshare.com/ndownloader/files/13237226)
Supplement: Supplementary file 1 [file 13237226]

## Sheet: Dataset
individual	sex	groups	treatment	bodylength	pitch	yaw	strokeFrequency	strokeAmplitude	averageSpeed	peakSpeed	averageAcceleration	wingArea	wingLength	flightPath	LinearDistance	Sinousity	TravelTime
28	f	success2	still-air2	0.16	23.19	-6.81	250	85.35	64.2	79.67	350.54	0.0091	0.1622	22.99	21.97	1.05	0.36
29	f	success2	still-air2	0.18	37.5	-15.94	212.32	140.12	29.92	55.94	156.2	0.0117	0.1922	23.97	22.54	1.06	0.8
30	f	success2	still-air2	0.16	41.01	-10.1	233.33	119.7	28.52	60.36	109.54	0.0144	0.2181	23.12	22.43	1.03	0.81
31	f	success2	still-air2	0.17	30.38	-13.54	265.38	133.92	44.97	57.16	234.24	0.0117	0.1909	23.17	22.4	1.03	0.52
32	f	success2	still-air2	0.14	31.47	3.82	233.33	97.52	41.99	55.19	155.06	0.0108	0.1692	22.88	22.35	1.02	0.55
1	f	fail	still-air	0.16	29.04	6.25	233.33	114.95	62	71.37	587.36	0.0092	0.1652	21.85	21.11	1.04	0.52
2	f	success	still-air	0.19	32	-0.18	166.67	115.15	54.64	80.72	274.32	0.0128	0.2083	22.78	22.16	1.03	0.42
3	m	success	still-air	0.18	24.56	-7.52	241.67	143.64	77.29	93.05	419.98	0.0106	0.1568	22.44	22.07	1.02	0.29
4	f	success	still-air	0.16	32.01	6.13	226.04	141.71	50.69	62.55	157.69	0.0112	0.1869	22.42	22.16	1.01	0.44
5	f	success	still-air	0.2	27.27	-14.66	257.69	137.51	72.17	92.55	621.94	0.0135	0.2045	22.81	21.97	1.04	0.32
6	f	success	still-air	0.21	27.9	-3.54	229.69	168.96	63.14	69.23	301.35	0.0133	0.2077	22.5	22.02	1.02	0.36
7	f	fail	still-air	0.16	39.37	-17.59	212.32	129.23	21.12	50.77	92.55	0.0102	0.1657	22.38	22.02	1.02	1.06
8	f	success	still-air	0.17	32.76	-4.7	250	129.55	53.89	77.56	214.26	0.0136	0.2115	23.39	22.18	1.05	0.43
9	f	success	still-air	0.18	29.15	-14.66	229.69	112	65.06	78.3	287.76	0.0122	0.2007	22.27	21.66	1.03	0.34
10	f	success	still-air	0.16	11.34	-19.44	269.23	146.9	90.93	101.71	372.66	0.0078	0.154	22.76	22.5	1.01	0.25
11	m	fail	still-air	0.16	36.78	6.27	194.44	137.83	54.09	66.26	341	0.0132	0.2022	22.89	21.33	1.07	0.42
12	m	success	still-air	0.16	31.9	-13.03	233.33	152.21	56.11	69.3	314.04	0.0097	0.1591	22.93	22.54	1.02	0.41
13	m	success	still-air	0.14	43.62	20.88	233.33	135.73	42.09	50.05	210.9	0.011	0.1684	22.24	21.62	1.03	0.53
14	f	success	still-air	0.13	32.75	16.43	250	155.9	59.33	68.77	313.61	0.0099	0.164	23.23	22.19	1.05	0.39
15	f	fail	still-air	0.13	41.79	-26.04	226.04	119.51	32.27	43.35	151.79	0.0107	0.1734	22.22	21.83	1.02	0.69
16	m	success	still-air	0.18	12.83	0.91	218.75	164.63	85.65	104.59	437.09	0.0111	0.1777	21.79	21.73	1	0.25
17	f	fail	still-air	0.15	39.15	-7.61	202.07	135.01	33.51	50.34	205.34	0.01	0.1695	22.94	22.22	1.03	0.68
18	f	success	still-air	0.17	19.57	-12.11	218.75	148.34	77.46	85.05	313.22	0.01	0.1825	22.36	22.14	1.01	0.29
19	f	fail	still-air	0.13	32.12	10.27	218.75	148.61	47.11	72.13	224.09	0.0069	0.1382	22.35	21.88	1.02	0.47
20	m	success	still-air	0.16	9.57	-4.62	238.89	146.15	92.03	113.33	481.84	0.0091	0.1546	22.07	21.77	1.01	0.24
21	f	fail	still-air	0.17	25.67	-1.17	250	152.7	49.67	56.12	275.19	0.0108	0.1686	22.56	22.15	1.02	0.45
22	f	success	still-air	0.19	33.87	5.61	245.83	168.31	43.81	62.63	327.54	0.0138	0.1867	22.32	21.49	1.04	0.51
23	f	success	still-air	0.16	35.56	-3.77	233.33	140.18	47.67	63.38	155.48	0.0118	0.1888	22.57	22.41	1.01	0.47
24	f	success	still-air	0.21	9.34	-16.35	250	93.87	87.82	99.56	637.46	0.0131	0.2094	23.41	22.83	1.03	0.27
25	m	fail	still-air	0.17	31.33	-5.15	247.92	119.9	56	69.84	281.96	0.0119	0.1994	23.19	22.95	1.01	0.47
26	f	fail	still-air	0.16	39.47	-10.74	250	123.11	46.03	70.34	379.78	0.0105	0.1806	24.01	22.2	1.08	0.46
27	f	fail	still-air	0.17	30.3	-2.39	198.26	89.65	49.69	64.33	216.67	0.0103	0.1622	23.13	22.97	1.01	0.41
28	f	fail	still-air	0.16	31.05	-2.24	245	97.94	50.47	61.72	241.89	0.0091	0.1681	23.09	22.07	1.05	0.35
29	f	success	still-air	0.18	32.28	-10.85	218.75	125.75	43.3	56.81	228.62	0.0117	0.1922	23.36	22.65	1.03	0.54
30	f	success	still-air	0.16	36.86	-9.17	244.44	142.29	45.92	67.07	359.65	0.0144	0.2181	23.32	22.35	1.04	0.51
31	f	success	still-air	0.17	24.14	-1.16	264.96	129.28	64.19	75.21	181.07	0.0117	0.1909	22.45	22.3	1.01	0.35
32	f	success	still-air	0.14	35.29	-11.56	240.97	138.78	37.3	56.52	204.49	0.0108	0.1692	23.19	22.81	1.02	0.62
1	f	fail	convection	0.16	50.75	-17.79	250	128.3	19.44	52.77	201.02	0.0092	0.1652	27.76	4.75	5.85	0.96
2	f	success	convection	0.19	38.96	12.22	169.44	124.31	48.82	83.22	381.65	0.0128	0.2083	23.07	21.58	1.07	0.47
3	m	success	convection	0.18	20.08	1.02	250	124.31	80.62	103.9	872.45	0.0106	0.1568	22.95	21.35	1.07	0.28
4	f	success	convection	0.16	34.88	5.99	244.44	125.8	42.4	61.09	396.44	0.0112	0.1869	26.7	21.8	1.22	0.63
5	f	success	convection	0.2	33.45	14.1	269.23	131.38	56	96.11	1417.72	0.0135	0.2045	34.4	22.81	1.51	0.61
6	f	success	convection	0.21	37.49	-8.05	234.03	138.5	40.64	60.98	246.69	0.0133	0.2077	24.16	22.18	1.09	0.59
7	f	fail	convection	0.16	47.82	27.47	234.03	122.2	23.2	55.27	252.34	0.0102	0.1657	18.2	6.78	2.68	0.79
8	f	success	convection	0.17	36.67	-18.64	276.71	130.14	64.03	83.67	398.1	0.0136	0.2115	24.39	22.69	1.07	0.38
9	f	success	convection	0.18	31.55	-7.94	228.47	124.34	56.97	74.06	285.63	0.0122	0.2007	22.71	21.82	1.04	0.4
10	f	success	convection	0.16	16.95	-7.05	291.67	120.26	83.11	99.89	652.54	0.0078	0.154	22.89	22.1	1.04	0.28
11	m	fail	convection	0.16	42.24	8.46	228.47	132.92	46.01	69.38	364.82	0.0132	0.2022	25.77	19.44	1.33	0.56
12	m	success	convection	0.16	35.01	-12.24	233.33	121.28	40.98	59.71	383.72	0.0097	0.1591	23.07	21.58	1.07	0.56
13	m	success	convection	0.14	45.22	2.65	257.26	120.26	38.98	72.33	328.71	0.011	0.1684	24.62	21.75	1.13	0.63
14	f	success	convection	0.13	5.08	-1.64	301.86	133.85	81.66	105.86	1527.36	0.0099	0.164	24.83	22.56	1.1	0.3
15	f	fail	convection	0.13	42.18	-10.27	244.44	150.14	30.13	61.92	251	0.0107	0.1734	26.68	17.55	1.52	0.89
16	m	success	convection	0.18	21.37	3.2	233.33	150.01	55.64	64.88	469.6	0.0111	0.1777	23.59	22.07	1.07	0.42
17	f	fail	convection	0.15	40.41	-3.34	226.04	121.23	40.68	78.08	441.71	0.01	0.1695	25.89	18.1	1.43	0.64
18	f	success	convection	0.17	30.73	-5.72	238.89	120.26	56.62	78.78	399.76	0.01	0.1825	23.14	22.1	1.05	0.41
19	f	fail	convection	0.13	54.17	1.9	233.33	156.44	26.28	77.19	261.04	0.0069	0.1382	37.53	11.67	3.22	1.43
20	m	success	convection	0.16	29.86	-18.13	244.44	128.16	60.9	76.99	428.57	0.0091	0.1546	22.97	22.42	1.02	0.38
21	f	fail	convection	0.17	36.1	9.15	262.82	121.34	40.41	57.01	319.41	0.0108	0.1686	22.17	20.77	1.07	0.55
22	f	success	convection	0.19	45.8	-1.02	244.44	121.3	34	65.74	427.75	0.0138	0.1867	31.57	21.49	1.47	0.93
23	f	success	convection	0.16	53.17	-3.94	250	134.14	21.85	50.09	269.2	0.0118	0.1888	31.18	21.61	1.44	1.43
24	f	success	convection	0.21	20.59	-5.64	247.22	131.68	67.37	78.11	409.42	0.0131	0.2094	23.53	22.3	1.05	0.35
25	m	fail	convection	0.17	47.16	14.15	250	118.97	38.48	86.85	647.38	0.0119	0.1994	53.66	13.66	3.93	0.85
26	f	fail	convection	0.16	50.45	8.46	247.92	138.45	25.81	60.09	226.02	0.0105	0.1806	24.89	18.86	1.32	0.43
27	f	fail	convection	0.17	41.22	22.01	202.75	132.48	38.12	71.19	524.97	0.0103	0.1622	32.23	9.77	3.3	1.39
28	f	fail	convection	0.16	46.22	21.18	266.03	110.15	42.48	68.61	318.94	0.0091	0.1681	18.29	16.15	1.13	1.43
29	f	success	convection	0.18	30.94	-18.37	247.22	151.82	57.45	84.01	622.43	0.0117	0.1922	23.79	22.32	1.07	0.41
30	f	success	convection	0.16	26.96	-9.1	264.42	112.78	65.75	103.87	719.9	0.0144	0.2181	24.87	23.21	1.07	0.38
31	f	success	convection	0.17	38.17	-13.78	266.83	70.76	26.98	65.9	234.59	0.0117	0.1909	27.92	18.11	1.54	1.04
32	f	success	convection	0.14	51.54	26.26	245	131.61	34.51	65.27	477.25	0.0108	0.1692	27.34	21.38	1.28	0.79

## Sheet: Control_afterConvection_Ind31_xyzpts
pt1_X	pt1_Y	pt1_Z	pt2_X	pt2_Y	pt2_Z	pt3_X	pt3_Y	pt3_Z	pt4_X	pt4_Y	pt4_Z
NaN	NaN	NaN	NaN	NaN	NaN	NaN	NaN	NaN	NaN	NaN	NaN
NaN	NaN	NaN	NaN	NaN	NaN	NaN	NaN	NaN	NaN	NaN	NaN
NaN	NaN	NaN	NaN	NaN	NaN	NaN	NaN	NaN	NaN	NaN	NaN
NaN	NaN	NaN	NaN	NaN	NaN	NaN	NaN	NaN	NaN	NaN	NaN
NaN	NaN	NaN	NaN	NaN	NaN	NaN	NaN	NaN	NaN	NaN	NaN
NaN	NaN	NaN	NaN	NaN	NaN	NaN	NaN	NaN	NaN	NaN	NaN
NaN	NaN	NaN	NaN	NaN	NaN	NaN	NaN	NaN	NaN	NaN	NaN
NaN	NaN	NaN	NaN	NaN	NaN	NaN	NaN	NaN	NaN	NaN	NaN
NaN	NaN	NaN	NaN	NaN	NaN	NaN	NaN	NaN	NaN	NaN	NaN
NaN	NaN	NaN	NaN	NaN	NaN	NaN	NaN	NaN	NaN	NaN	NaN
NaN	NaN	NaN	NaN	NaN	NaN	NaN	NaN	NaN	NaN	NaN	NaN
NaN	NaN	NaN	NaN	NaN	NaN	NaN	NaN	NaN	NaN	NaN	NaN
NaN	NaN	NaN	NaN	NaN	NaN	NaN	NaN	NaN	NaN	NaN	NaN
NaN	NaN	NaN	NaN	NaN	NaN	NaN	NaN	NaN	NaN	NaN	NaN
NaN	NaN	NaN	NaN	NaN	NaN	NaN	NaN	NaN	NaN	NaN	NaN
NaN	NaN	NaN	NaN	NaN	NaN	NaN	NaN	NaN	NaN	NaN	NaN
NaN	NaN	NaN	NaN	NaN	NaN	NaN	NaN	NaN	NaN	NaN	NaN
NaN	NaN	NaN	NaN	NaN	NaN	NaN	NaN	NaN	NaN	NaN	NaN
NaN	NaN	NaN	NaN	NaN	NaN	NaN	NaN	NaN	NaN	NaN	NaN
NaN	NaN	NaN	NaN	NaN	NaN	NaN	NaN	NaN	NaN	NaN	NaN
NaN	NaN	NaN	NaN	NaN	NaN	NaN	NaN	NaN	NaN	NaN	NaN
NaN	NaN	NaN	NaN	NaN	NaN	NaN	NaN	NaN	NaN	NaN	NaN
NaN	NaN	NaN	NaN	NaN	NaN	NaN	NaN	NaN	NaN	NaN	NaN
NaN	NaN	NaN	NaN	NaN	NaN	NaN	NaN	NaN	NaN	NaN	NaN
NaN	NaN	NaN	NaN	NaN	NaN	NaN	NaN	NaN	NaN	NaN	NaN
NaN	NaN	NaN	NaN	NaN	NaN	NaN	NaN	NaN	NaN	NaN	NaN
NaN	NaN	NaN	NaN	NaN	NaN	NaN	NaN	NaN	NaN	NaN	NaN
NaN	NaN	NaN	NaN	NaN	NaN	NaN	NaN	NaN	NaN	NaN	NaN
NaN	NaN	NaN	NaN	NaN	NaN	NaN	NaN	NaN	NaN	NaN	NaN
NaN	NaN	NaN	NaN	NaN	NaN	NaN	NaN	NaN	NaN	NaN	NaN
NaN	NaN	NaN	NaN	NaN	NaN	NaN	NaN	NaN	NaN	NaN	NaN
NaN	NaN	NaN	NaN	NaN	NaN	NaN	NaN	NaN	NaN	NaN	NaN
NaN	NaN	NaN	NaN	NaN	NaN	NaN	NaN	NaN	NaN	NaN	NaN
NaN	NaN	NaN	NaN	NaN	NaN	NaN	NaN	NaN	NaN	NaN	NaN
NaN	NaN	NaN	NaN	NaN	NaN	NaN	NaN	NaN	NaN	NaN	NaN
NaN	NaN	NaN	NaN	NaN	NaN	NaN	NaN	NaN	NaN	NaN	NaN
NaN	NaN	NaN	NaN	NaN	NaN	NaN	NaN	NaN	NaN	NaN	NaN
NaN	NaN	NaN	NaN	NaN	NaN	NaN	NaN	NaN	NaN	NaN	NaN
NaN	NaN	NaN	NaN	NaN	NaN	NaN	NaN	NaN	NaN	NaN	NaN
NaN	NaN	NaN	NaN	NaN	NaN	NaN	NaN	NaN	NaN	NaN	NaN
NaN	NaN	NaN	NaN	NaN	NaN	NaN	NaN	NaN	NaN	NaN	NaN
NaN	NaN	NaN	NaN	NaN	NaN	NaN	NaN	NaN	NaN	NaN	NaN
NaN	NaN	NaN	NaN	NaN	NaN	NaN	NaN	NaN	NaN	NaN	NaN
NaN	NaN	NaN	NaN	NaN	NaN	NaN	NaN	NaN	NaN	NaN	NaN
NaN	NaN	NaN	NaN	NaN	NaN	NaN	NaN	NaN	NaN	NaN	NaN
NaN	NaN	NaN	NaN	NaN	NaN	NaN	NaN	NaN	NaN	NaN	NaN
NaN	NaN	NaN	NaN	NaN	NaN	NaN	NaN	NaN	NaN	NaN	NaN
NaN	NaN	NaN	NaN	NaN	NaN	NaN	NaN	NaN	NaN	NaN	NaN
NaN	NaN	NaN	NaN	NaN	NaN	NaN	NaN	NaN	NaN	NaN	NaN
NaN	NaN	NaN	NaN	NaN	NaN	NaN	NaN	NaN	NaN	NaN	NaN
NaN	NaN	NaN	NaN	NaN	NaN	NaN	NaN	NaN	NaN	NaN	NaN
NaN	NaN	NaN	NaN	NaN	NaN	NaN	NaN	NaN	NaN	NaN	NaN
NaN	NaN	NaN	NaN	NaN	NaN	NaN	NaN	NaN	NaN	NaN	NaN
NaN	NaN	NaN	NaN	NaN	NaN	NaN	NaN	NaN	NaN	NaN	NaN
NaN	NaN	NaN	NaN	NaN	NaN	NaN	NaN	NaN	NaN	NaN	NaN
NaN	NaN	NaN	NaN	NaN	NaN	NaN	NaN	NaN	NaN	NaN	NaN
NaN	NaN	NaN	NaN	NaN	NaN	NaN	NaN	NaN	NaN	NaN	NaN
NaN	NaN	NaN	NaN	NaN	NaN	NaN	NaN	NaN	NaN	NaN	NaN
NaN	NaN	NaN	NaN	NaN	NaN	NaN	NaN	NaN	NaN	NaN	NaN
NaN	NaN	NaN	NaN	NaN	NaN	NaN	NaN	NaN	NaN	NaN	NaN
NaN	NaN	NaN	NaN	NaN	NaN	NaN	NaN	NaN	NaN	NaN	NaN
NaN	NaN	NaN	NaN	NaN	NaN	NaN	NaN	NaN	NaN	NaN	NaN
NaN	NaN	NaN	NaN	NaN	NaN	NaN	NaN	NaN	NaN	NaN	NaN
NaN	NaN	NaN	NaN	NaN	NaN	NaN	NaN	NaN	NaN	NaN	NaN
NaN	NaN	NaN	NaN	NaN	NaN	NaN	NaN	NaN	NaN	NaN	NaN
NaN	NaN	NaN	NaN	NaN	NaN	NaN	NaN	NaN	NaN	NaN	NaN
NaN	NaN	NaN	NaN	NaN	NaN	NaN	NaN	NaN	NaN	NaN	NaN
NaN	NaN	NaN	NaN	NaN	NaN	NaN	NaN	NaN	NaN	NaN	NaN
NaN	NaN	NaN	NaN	NaN	NaN	NaN	NaN	NaN	NaN	NaN	NaN
NaN	NaN	NaN	NaN	NaN	NaN	NaN	NaN	NaN	NaN	NaN	NaN
NaN	NaN	NaN	NaN	NaN	NaN	NaN	NaN	NaN	NaN	NaN	NaN
NaN	NaN	NaN	NaN	NaN	NaN	NaN	NaN	NaN	NaN	NaN	NaN
NaN	NaN	NaN	NaN	NaN	NaN	NaN	NaN	NaN	NaN	NaN	NaN
NaN	NaN	NaN	NaN	NaN	NaN	NaN	NaN	NaN	NaN	NaN	NaN
NaN	NaN	NaN	NaN	NaN	NaN	NaN	NaN	NaN	NaN	NaN	NaN
NaN	NaN	NaN	NaN	NaN	NaN	NaN	NaN	NaN	NaN	NaN	NaN
NaN	NaN	NaN	NaN	NaN	NaN	NaN	NaN	NaN	NaN	NaN	NaN
NaN	NaN	NaN	NaN	NaN	NaN	NaN	NaN	NaN	NaN	NaN	NaN
NaN	NaN	NaN	NaN	NaN	NaN	NaN	NaN	NaN	NaN	NaN	NaN
NaN	NaN	NaN	NaN	NaN	NaN	NaN	NaN	NaN	NaN	NaN	NaN
NaN	NaN	NaN	NaN	NaN	NaN	NaN	NaN	NaN	NaN	NaN	NaN
NaN	NaN	NaN	NaN	NaN	NaN	NaN	NaN	NaN	NaN	NaN	NaN
NaN	NaN	NaN	NaN	NaN	NaN	NaN	NaN	NaN	NaN	NaN	NaN
NaN	NaN	NaN	NaN	NaN	NaN	NaN	NaN	NaN	NaN	NaN	NaN
NaN	NaN	NaN	NaN	NaN	NaN	NaN	NaN	NaN	NaN	NaN	NaN
NaN	NaN	NaN	NaN	NaN	NaN	NaN	NaN	NaN	NaN	NaN	NaN
NaN	NaN	NaN	NaN	NaN	NaN	NaN	NaN	NaN	NaN	NaN	NaN
NaN	NaN	NaN	NaN	NaN	NaN	NaN	NaN	NaN	NaN	NaN	NaN
NaN	NaN	NaN	NaN	NaN	NaN	NaN	NaN	NaN	NaN	NaN	NaN
NaN	NaN	NaN	NaN	NaN	NaN	NaN	NaN	NaN	NaN	NaN	NaN
NaN	NaN	NaN	NaN	NaN	NaN	NaN	NaN	NaN	NaN	NaN	NaN
NaN	NaN	NaN	NaN	NaN	NaN	NaN	NaN	NaN	NaN	NaN	NaN
NaN	NaN	NaN	NaN	NaN	NaN	NaN	NaN	NaN	NaN	NaN	NaN
NaN	NaN	NaN	NaN	NaN	NaN	NaN	NaN	NaN	NaN	NaN	NaN
NaN	NaN	NaN	NaN	NaN	NaN	NaN	NaN	NaN	NaN	NaN	NaN
NaN	NaN	NaN	NaN	NaN	NaN	NaN	NaN	NaN	NaN	NaN	NaN
NaN	NaN	NaN	NaN	NaN	NaN	NaN	NaN	NaN	NaN	NaN	NaN
NaN	NaN	NaN	NaN	NaN	NaN	NaN	NaN	NaN	NaN	NaN	NaN
NaN	NaN	NaN	NaN	NaN	NaN	NaN	NaN	NaN	NaN	NaN	NaN
NaN	NaN	NaN	NaN	NaN	NaN	NaN	NaN	NaN	NaN	NaN	NaN
NaN	NaN	NaN	NaN	NaN	NaN	NaN	NaN	NaN	NaN	NaN	NaN
NaN	NaN	NaN	NaN	NaN	NaN	NaN	NaN	NaN	NaN	NaN	NaN
NaN	NaN	NaN	NaN	NaN	NaN	NaN	NaN	NaN	NaN	NaN	NaN
NaN	NaN	NaN	NaN	NaN	NaN	NaN	NaN	NaN	NaN	NaN	NaN
NaN	NaN	NaN	NaN	NaN	NaN	NaN	NaN	NaN	NaN	NaN	NaN
NaN	NaN	NaN	NaN	NaN	NaN	NaN	NaN	NaN	NaN	NaN	NaN
NaN	NaN	NaN	NaN	NaN	NaN	NaN	NaN	NaN	NaN	NaN	NaN
NaN	NaN	NaN	NaN	NaN	NaN	NaN	NaN	NaN	NaN	NaN	NaN
NaN	NaN	NaN	NaN	NaN	NaN	NaN	NaN	NaN	NaN	NaN	NaN
NaN	NaN	NaN	NaN	NaN	NaN	NaN	NaN	NaN	NaN	NaN	NaN
NaN	NaN	NaN	NaN	NaN	NaN	NaN	NaN	NaN	NaN	NaN	NaN
NaN	NaN	NaN	NaN	NaN	NaN	NaN	NaN	NaN	NaN	NaN	NaN
NaN	NaN	NaN	NaN	NaN	NaN	NaN	NaN	NaN	NaN	NaN	NaN
NaN	NaN	NaN	NaN	NaN	NaN	NaN	NaN	NaN	NaN	NaN	NaN
NaN	NaN	NaN	NaN	NaN	NaN	NaN	NaN	NaN	NaN	NaN	NaN
NaN	NaN	NaN	NaN	NaN	NaN	NaN	NaN	NaN	NaN	NaN	NaN
NaN	NaN	NaN	NaN	NaN	NaN	NaN	NaN	NaN	NaN	NaN	NaN
NaN	NaN	NaN	NaN	NaN	NaN	NaN	NaN	NaN	NaN	NaN	NaN
NaN	NaN	NaN	NaN	NaN	NaN	NaN	NaN	NaN	NaN	NaN	NaN
NaN	NaN	NaN	NaN	NaN	NaN	NaN	NaN	NaN	NaN	NaN	NaN
NaN	NaN	NaN	NaN	NaN	NaN	NaN	NaN	NaN	NaN	NaN	NaN
NaN	NaN	NaN	NaN	NaN	NaN	NaN	NaN	NaN	NaN	NaN	NaN
NaN	NaN	NaN	NaN	NaN	NaN	NaN	NaN	NaN	NaN	NaN	NaN
NaN	NaN	NaN	NaN	NaN	NaN	NaN	NaN	NaN	NaN	NaN	NaN
NaN	NaN	NaN	NaN	NaN	NaN	NaN	NaN	NaN	NaN	NaN	NaN
NaN	NaN	NaN	NaN	NaN	NaN	NaN	NaN	NaN	NaN	NaN	NaN
NaN	NaN	NaN	NaN	NaN	NaN	NaN	NaN	NaN	NaN	NaN	NaN
NaN	NaN	NaN	NaN	NaN	NaN	NaN	NaN	NaN	NaN	NaN	NaN
NaN	NaN	NaN	NaN	NaN	NaN	NaN	NaN	NaN	NaN	NaN	NaN
NaN	NaN	NaN	NaN	NaN	NaN	NaN	NaN	NaN	NaN	NaN	NaN
NaN	NaN	NaN	NaN	NaN	NaN	NaN	NaN	NaN	NaN	NaN	NaN
NaN	NaN	NaN	NaN	NaN	NaN	NaN	NaN	NaN	NaN	NaN	NaN
NaN	NaN	NaN	NaN	NaN	NaN	NaN	NaN	NaN	NaN	NaN	NaN
NaN	NaN	NaN	NaN	NaN	NaN	NaN	NaN	NaN	NaN	NaN	NaN
NaN	NaN	NaN	NaN	NaN	NaN	NaN	NaN	NaN	NaN	NaN	NaN
NaN	NaN	NaN	NaN	NaN	NaN	NaN	NaN	NaN	NaN	NaN	NaN
NaN	NaN	NaN	NaN	NaN	NaN	NaN	NaN	NaN	NaN	NaN	NaN
NaN	NaN	NaN	NaN	NaN	NaN	NaN	NaN	NaN	NaN	NaN	NaN
NaN	NaN	NaN	NaN	NaN	NaN	NaN	NaN	NaN	NaN	NaN	NaN
NaN	NaN	NaN	NaN	NaN	NaN	NaN	NaN	NaN	NaN	NaN	NaN
NaN	NaN	NaN	NaN	NaN	NaN	NaN	NaN	NaN	NaN	NaN	NaN
NaN	NaN	NaN	NaN	NaN	NaN	NaN	NaN	NaN	NaN	NaN	NaN
NaN	NaN	NaN	NaN	NaN	NaN	NaN	NaN	NaN	NaN	NaN	NaN
NaN	NaN	NaN	NaN	NaN	NaN	NaN	NaN	NaN	NaN	NaN	NaN
NaN	NaN	NaN	NaN	NaN	NaN	NaN	NaN	NaN	NaN	NaN	NaN
NaN	NaN	NaN	NaN	NaN	NaN	NaN	NaN	NaN	NaN	NaN	NaN
NaN	NaN	NaN	NaN	NaN	NaN	NaN	NaN	NaN	NaN	NaN	NaN
NaN	NaN	NaN	NaN	NaN	NaN	NaN	NaN	NaN	NaN	NaN	NaN
NaN	NaN	NaN	NaN	NaN	NaN	NaN	NaN	NaN	NaN	NaN	NaN
NaN	NaN	NaN	NaN	NaN	NaN	NaN	NaN	NaN	NaN	NaN	NaN
NaN	NaN	NaN	NaN	NaN	NaN	NaN	NaN	NaN	NaN	NaN	NaN
NaN	NaN	NaN	NaN	NaN	NaN	NaN	NaN	NaN	NaN	NaN	NaN
NaN	NaN	NaN	NaN	NaN	NaN	NaN	NaN	NaN	NaN	NaN	NaN
NaN	NaN	NaN	NaN	NaN	NaN	NaN	NaN	NaN	NaN	NaN	NaN
NaN	NaN	NaN	NaN	NaN	NaN	NaN	NaN	NaN	NaN	NaN	NaN
NaN	NaN	NaN	NaN	NaN	NaN	NaN	NaN	NaN	NaN	NaN	NaN
NaN	NaN	NaN	NaN	NaN	NaN	NaN	NaN	NaN	NaN	NaN	NaN
NaN	NaN	NaN	NaN	NaN	NaN	NaN	NaN	NaN	NaN	NaN	NaN
NaN	NaN	NaN	NaN	NaN	NaN	NaN	NaN	NaN	NaN	NaN	NaN
NaN	NaN	NaN	NaN	NaN	NaN	NaN	NaN	NaN	NaN	NaN	NaN
NaN	NaN	NaN	NaN	NaN	NaN	NaN	NaN	NaN	NaN	NaN	NaN
NaN	NaN	NaN	NaN	NaN	NaN	NaN	NaN	NaN	NaN	NaN	NaN
NaN	NaN	NaN	NaN	NaN	NaN	NaN	NaN	NaN	NaN	NaN	NaN
NaN	NaN	NaN	NaN	NaN	NaN	NaN	NaN	NaN	NaN	NaN	NaN
NaN	NaN	NaN	NaN	NaN	NaN	NaN	NaN	NaN	NaN	NaN	NaN
NaN	NaN	NaN	NaN	NaN	NaN	NaN	NaN	NaN	NaN	NaN	NaN
-3.65733	2.68217	1.36474	-3.8672	2.67468	1.37975	-3.74806	2.68191	1.43304	-3.75716	2.78666	1.6141
-3.63506	2.66576	1.3744	-3.84673	2.67201	1.3831	-3.75171	2.6223	1.41908	-3.75229	2.88095	1.58258
-3.61852	2.67281	1.37908	-3.84361	2.65139	1.38697	-3.74308	2.62309	1.41878	-3.7027	2.99723	1.47687
-3.58834	2.72376	1.40254	-3.84727	2.60881	1.38272	-3.72862	2.6281	1.41915	-3.634	2.93701	1.38074
-3.60079	2.66272	1.40269	-3.81559	2.64058	1.39471	-3.71099	2.64411	1.42476	-3.56003	2.89377	1.32998
-3.59104	2.65676	1.42053	-3.80576	2.62963	1.38831	-3.66907	2.70288	1.44338	-3.50464	2.78481	1.34852
-3.58221	2.66551	1.43406	-3.77542	2.68646	1.39763	-3.63983	2.73052	1.45127	-3.48386	2.70982	1.36218
-3.56139	2.68319	1.43832	-3.76226	2.68603	1.40696	-3.61559	2.76948	1.46191	-3.44536	2.82872	1.40922
-3.52853	2.71505	1.45228	-3.75454	2.66538	1.4089	-3.59611	2.79601	1.46762	-3.42572	3.06304	1.44568
-3.53295	2.67345	1.45515	-3.7393	2.67499	1.41251	-3.60001	2.7645	1.4642	-3.49931	3.16119	1.47727
-3.49091	2.73664	1.47532	-3.73754	2.64673	1.40564	-3.59994	2.74489	1.47817	-3.70604	2.80284	1.56588
-3.47116	2.73304	1.48959	-3.71432	2.67713	1.41356	-3.59415	2.72682	1.48974	-3.71556	2.75575	1.64432
-3.48001	2.66397	1.49188	-3.68281	2.67973	1.41454	-3.56519	2.76178	1.50297	-3.66029	2.77466	1.67313
-3.46279	2.69784	1.49865	-3.67537	2.67423	1.4233	-3.56444	2.72678	1.50949	-3.67974	2.69687	1.67364
-3.48142	2.62213	1.50711	-3.63432	2.72461	1.4406	-3.54936	2.71114	1.50772	-3.66928	2.82004	1.62798
-3.47962	2.60076	1.50472	-3.64218	2.67401	1.44012	-3.56018	2.65698	1.50377	-3.63127	2.84497	1.55979
-3.44803	2.64583	1.52084	-3.63439	2.65043	1.43641	-3.5431	2.67443	1.5154	-3.55615	2.86085	1.48708
-3.42777	2.65885	1.52568	-3.62118	2.65048	1.44387	-3.5094	2.71572	1.52347	-3.46692	2.90344	1.47501
-3.42852	2.61226	1.52956	-3.59592	2.66428	1.44898	-3.50593	2.69031	1.52707	-3.35114	2.97016	1.49965
-3.41285	2.6292	1.54093	-3.58032	2.66609	1.45334	-3.48364	2.691	1.53527	-3.25284	3.08873	1.55208
-3.4084	2.61768	1.54898	-3.561	2.66937	1.45414	-3.45664	2.70643	1.54508	-3.30891	2.96634	1.55638
-3.39866	2.58697	1.55056	-3.53283	2.71173	1.46873	-3.45164	2.68553	1.55764	-3.45964	2.76509	1.53153
-3.38161	2.5908	1.56154	-3.52328	2.70627	1.46469	-3.43614	2.71113	1.56923	-3.58463	2.65794	1.62599
-3.35673	2.61235	1.56808	-3.4908	2.74021	1.46977	-3.40741	2.7406	1.58597	-3.56597	2.70764	1.69817
-3.33511	2.61419	1.57058	-3.46957	2.76802	1.47834	-3.39769	2.74192	1.5902	-3.56725	2.6845	1.72726
-3.28581	2.68964	1.59184	-3.4705	2.70246	1.4792	-3.37212	2.77267	1.59932	-3.5297	2.7327	1.73505
-3.27356	2.67547	1.6077	-3.45669	2.70902	1.48601	-3.38473	2.70624	1.60217	-3.51614	2.79281	1.7067
-3.24891	2.71721	1.62415	-3.43689	2.7374	1.48799	-3.36238	2.73082	1.60704	-3.45968	2.8178	1.66269
-3.25973	2.65012	1.62117	-3.39847	2.79973	1.50455	-3.32784	2.76422	1.62122	-3.45051	2.70003	1.64302
-3.2369	2.68168	1.62946	-3.3889	2.79814	1.51745	-3.3141	2.74645	1.62914	-3.38671	2.41276	1.5029
-3.21146	2.7222	1.64483	-3.38343	2.75308	1.53062	-3.3166	2.69969	1.62186	-3.27244	2.46088	1.52545
-3.21117	2.66189	1.65654	-3.37851	2.71695	1.52952	-3.32424	2.65716	1.62299	-3.23033	2.42908	1.54925
-3.21671	2.6047	1.64953	-3.37773	2.66848	1.53208	-3.31249	2.64826	1.62772	-3.28046	2.3642	1.53826
-3.20806	2.60505	1.65236	-3.36632	2.66898	1.53617	-3.28395	2.68149	1.63512	-3.3462	2.42441	1.53381
-3.21088	2.56446	1.65265	-3.35203	2.66961	1.54696	-3.27858	2.65609	1.63723	-3.42152	2.44697	1.59353
-3.18269	2.60739	1.65907	-3.29959	2.75419	1.5599	-3.27405	2.63124	1.63933	-3.55747	2.26859	1.65737
-3.16783	2.59088	1.66076	-3.32417	2.67077	1.54125	-3.2698	2.58869	1.64071	-3.37529	2.67013	1.73603
-3.15419	2.56188	1.66267	-3.28905	2.71657	1.55863	-3.24655	2.61107	1.65145	-3.39497	2.55316	1.69877
-3.1395	2.56947	1.6734	-3.25824	2.74882	1.56848	-3.22793	2.60248	1.66056	-3.33687	2.57867	1.67085
-3.11251	2.60788	1.67845	-3.23763	2.7895	1.58107	-3.21331	2.59111	1.66667	-3.33585	2.59416	1.67275
-3.09204	2.61105	1.68457	-3.20177	2.8293	1.58947	-3.19087	2.59804	1.67092	-3.18654	2.42274	1.52457
-3.06138	2.64368	1.70166	-3.21038	2.79063	1.58871	-3.17895	2.58878	1.68022	-3.12617	2.4544	1.53147
-3.05468	2.64146	1.71078	-3.20397	2.75877	1.60108	-3.1755	2.5643	1.6746	-3.03875	2.4575	1.55539
-3.03957	2.64375	1.7154	-3.20098	2.70529	1.60214	-3.1711	2.53838	1.67897	-3.01147	2.47167	1.57485
-3.04187	2.61457	1.71459	-3.1827	2.68575	1.61188	-3.16038	2.55744	1.67477	-3.0585	2.46455	1.5627
-3.04322	2.57118	1.70854	-3.15364	2.76086	1.62724	-3.16255	2.53223	1.67606	-3.11053	2.53005	1.54563
-3.02054	2.6054	1.71822	-3.13916	2.75105	1.62294	-3.16081	2.49599	1.67278	-3.19608	2.59132	1.57049
-2.99389	2.59473	1.73642	-3.1466	2.69466	1.62029	-3.15201	2.49235	1.68695	-3.2642	2.4565	1.66007
-2.95767	2.61738	1.74444	-3.12495	2.72207	1.63669	-3.12128	2.53887	1.70244	-3.26563	2.44644	1.70491
-2.9219	2.65449	1.75647	-3.10999	2.71077	1.63923	-3.08376	2.55645	1.7102	-3.23063	2.47668	1.6807
-2.93086	2.60491	1.75688	-3.09322	2.70185	1.64881	-3.06631	2.53673	1.71883	-3.03847	2.82968	1.66344
-2.92974	2.60374	1.75572	-3.07566	2.71904	1.65829	-3.03662	2.57694	1.72297	-3.06307	2.67919	1.5868
-2.91826	2.59815	1.75955	-3.04722	2.73566	1.66805	-3.02019	2.59533	1.73923	-2.97789	2.55452	1.54774
-2.90579	2.55925	1.76353	-3.05118	2.72709	1.67485	-2.99978	2.60131	1.74255	-2.91874	2.50959	1.54815
-2.88025	2.59007	1.77506	-3.04659	2.71225	1.6776	-3.0012	2.56644	1.7461	-2.87259	2.53593	1.56265
-2.89954	2.51129	1.77761	-3.05473	2.65827	1.67781	-2.94802	2.63665	1.7527	-2.9091	2.41267	1.56581
-2.91219	2.44767	1.77347	-3.02388	2.69892	1.68856	-2.96552	2.5631	1.7469	-2.90775	2.50844	1.59102
-2.88833	2.47756	1.7738	-2.9791	2.76395	1.70426	-2.92822	2.62506	1.76221	-3.00692	2.46623	1.57285
-2.86373	2.4965	1.77644	-2.94182	2.82866	1.73139	-2.89911	2.6758	1.77082	-3.05615	2.49687	1.60895
-2.86252	2.45836	1.77337	-2.95265	2.75258	1.72471	-2.89311	2.63183	1.76452	-3.10009	2.42693	1.67533
-2.83059	2.484	1.79781	-2.92793	2.7863	1.73798	-2.88412	2.63062	1.77821	-3.06713	2.46451	1.70742
-2.81169	2.5118	1.79611	-2.93725	2.68862	1.7303	-2.86961	2.60157	1.77568	-3.00769	2.55152	1.70832
-2.80675	2.4887	1.79615	-2.91527	2.67023	1.73819	-2.85304	2.59372	1.77527	-2.91306	2.68324	1.65281
-2.79876	2.47652	1.79478	-2.91013	2.67731	1.74143	-2.83401	2.60449	1.77648	-2.86804	2.67549	1.63156
-2.77834	2.4751	1.79573	-2.87969	2.7237	1.75498	-2.8255	2.60467	1.77537	-2.78087	2.74371	1.61274
-2.76232	2.46774	1.79422	-2.87406	2.69426	1.75375	-2.81749	2.56973	1.77288	-2.73567	2.63944	1.59876
-2.74568	2.49115	1.7992	-2.86731	2.66487	1.75474	-2.80825	2.5459	1.77517	-2.73171	2.56699	1.58547
-2.72601	2.5111	1.81235	-2.86645	2.65367	1.76214	-2.80083	2.52334	1.77249	-2.79129	2.33161	1.5819
-2.71001	2.51959	1.82421	-2.84336	2.68784	1.77576	-2.77117	2.58311	1.7854	-2.76862	2.50377	1.60268
-2.68438	2.55032	1.8304	-2.80586	2.762	1.8011	-2.76142	2.57932	1.79258	-2.82505	2.5602	1.61665
-2.66048	2.55083	1.83177	-2.79475	2.76887	1.80897	-2.75535	2.58485	1.80333	-2.8757	2.51727	1.65319
-2.63574	2.58679	1.83882	-2.80445	2.69253	1.81071	-2.73581	2.59768	1.80989	-2.87534	2.52494	1.6786
-2.62086	2.56145	1.84759	-2.7787	2.68568	1.82085	-2.72689	2.56168	1.81145	-2.85003	2.53909	1.68623
-2.60931	2.5515	1.84998	-2.74326	2.73251	1.82958	-2.71882	2.54585	1.81125	-2.81644	2.45417	1.66875
-2.594	2.5467	1.84993	-2.73864	2.6944	1.82999	-2.69681	2.57824	1.821	-2.69929	2.59968	1.63906
-2.59733	2.51442	1.86083	-2.75746	2.64024	1.83266	-2.67922	2.54673	1.8223	-2.64315	2.54634	1.61749
-2.57323	2.55492	1.87191	-2.74689	2.64571	1.84277	-2.66015	2.54813	1.8317	-2.5203	2.68142	1.63547
-2.56137	2.54311	1.86858	-2.73163	2.65282	1.84857	-2.64187	2.546	1.83308	-2.48567	2.58874	1.6647
-2.53987	2.55083	1.86894	-2.70004	2.67486	1.8502	-2.61897	2.54489	1.83145	-2.43746	2.63291	1.69026
-2.52385	2.51525	1.86695	-2.6673	2.69456	1.85601	-2.62476	2.51052	1.82928	-2.46259	2.56027	1.66884
-2.51375	2.52393	1.87922	-2.63767	2.73764	1.86749	-2.61425	2.5175	1.84108	-2.54536	2.64496	1.65028
-2.48838	2.5512	1.8861	-2.62417	2.73322	1.87516	-2.60317	2.51638	1.84	-2.65469	2.55245	1.65769
-2.47806	2.54841	1.88529	-2.62118	2.72349	1.8825	-2.58683	2.51797	1.84904	-2.68059	2.55033	1.68656
-2.46052	2.55459	1.8873	-2.62076	2.68732	1.88225	-2.58767	2.48444	1.84984	-2.70835	2.49619	1.71185
-2.44959	2.55813	1.88851	-2.61329	2.66492	1.88575	-2.57395	2.484	1.85098	-2.66561	2.51376	1.73441
-2.44217	2.51321	1.87718	-2.60543	2.64558	1.88504	-2.56052	2.48432	1.84781	-2.63271	2.49235	1.69855
-2.43657	2.49135	1.88645	-2.59938	2.61177	1.8854	-2.55509	2.46371	1.85127	-2.52868	2.63482	1.67239
-2.41323	2.51084	1.89487	-2.58194	2.60762	1.8863	-2.56007	2.41909	1.84932	-2.47313	2.64168	1.65779
-2.4024	2.48785	1.88801	-2.56269	2.6074	1.88733	-2.53333	2.42718	1.85259	-2.3905	2.57877	1.66622
-2.39218	2.48687	1.88663	-2.5089	2.70027	1.9117	-2.51996	2.42018	1.8494	-2.33923	2.58208	1.69488
-2.3891	2.46945	1.88861	-2.49884	2.70799	1.92347	-2.4781	2.4592	1.85895	-2.30354	2.55531	1.69878
-2.39296	2.43129	1.88941	-2.49063	2.68391	1.92733	-2.43714	2.52454	1.87863	-2.31087	2.60945	1.6984
-2.36174	2.47326	1.89949	-2.47208	2.68634	1.92632	-2.40595	2.56112	1.88824	-2.43269	2.55378	1.67028
-2.33712	2.49208	1.90509	-2.46812	2.70118	1.93058	-2.40192	2.52725	1.88878	-2.49895	2.58011	1.70874
-2.32797	2.46863	1.90735	-2.4452	2.7045	1.93937	-2.40055	2.49704	1.88765	-2.54509	2.47994	1.73869
-2.32704	2.4242	1.90602	-2.43597	2.67435	1.93954	-2.3869	2.49196	1.8872	-2.52022	2.49345	1.76258
-2.31037	2.42927	1.90848	-2.41393	2.66706	1.94333	-2.39146	2.45872	1.8794	-2.52393	2.44224	1.74393
-2.28593	2.453	1.91657	-2.40449	2.66428	1.94144	-2.35432	2.51443	1.89543	-2.50174	2.4282	1.70592
-2.25626	2.4712	1.92764	-2.39527	2.65773	1.94479	-2.32029	2.56733	1.90833	-2.44441	2.44766	1.678
-2.25559	2.43013	1.92515	-2.39819	2.61249	1.94141	-2.32738	2.49534	1.89644	-2.33558	2.54113	1.69192
-2.25913	2.401	1.92823	-2.38106	2.61059	1.94336	-2.31358	2.49183	1.90581	-2.24701	2.56474	1.70608
-2.24372	2.40728	1.9376	-2.35844	2.64628	1.9512	-2.29713	2.49509	1.90734	-2.19241	2.54927	1.72504
-2.21977	2.43518	1.94804	-2.32165	2.68662	1.96343	-2.28398	2.49765	1.90665	-2.15468	2.60227	1.74415
-2.18608	2.46854	1.94462	-2.31532	2.65801	1.95276	-2.27554	2.47309	1.90775	-2.19596	2.5716	1.71004
-2.17505	2.44708	1.94653	-2.3297	2.59779	1.9557	-2.26366	2.43795	1.90763	-2.28071	2.55145	1.71047
-2.16019	2.43462	1.94316	-2.30256	2.61238	1.959	-2.2518	2.43284	1.90537	-2.33006	2.57281	1.73431
-2.15559	2.40301	1.94712	-2.30515	2.59751	1.95534	-2.24378	2.43184	1.90622	-2.34507	2.54443	1.7632
-2.14837	2.37816	1.94684	-2.2732	2.62059	1.96056	-2.22807	2.43948	1.90628	-2.33328	2.48346	1.77822
-2.13465	2.37728	1.94661	-2.24719	2.61847	1.96145	-2.21006	2.43544	1.90567	-2.28652	2.52106	1.76348
-2.11035	2.40669	1.94412	-2.243	2.58758	1.95998	-2.18791	2.44489	1.90848	-2.22135	2.48934	1.71568
-2.11732	2.35615	1.94915	-2.22194	2.58852	1.97025	-2.17138	2.44195	1.91636	-2.15759	2.47873	1.7106
-2.12475	2.30488	1.94547	-2.21867	2.55681	1.96076	-2.16046	2.43369	1.9239	-2.0197	2.57576	1.75984
-2.10533	2.32593	1.95159	-2.20206	2.56016	1.96193	-2.14109	2.43951	1.92668	-1.98074	2.49357	1.78461
-2.08382	2.33683	1.95358	-2.18289	2.56344	1.96172	-2.1234	2.44619	1.92774	-1.93981	2.45048	1.83312
-2.0705	2.31941	1.94853	-2.19061	2.49594	1.96241	-2.10458	2.44139	1.92551	-1.93162	2.45827	1.81846
-2.0457	2.34663	1.95389	-2.17011	2.53022	1.97056	-2.09067	2.44545	1.92476	-1.97672	2.54053	1.76448
-2.03776	2.32451	1.94857	-2.14935	2.54054	1.97323	-2.07026	2.45434	1.92788	-2.0887	2.51639	1.72538
-2.02515	2.31795	1.94631	-2.13707	2.53492	1.97107	-2.07198	2.41574	1.92538	-2.15814	2.48801	1.73551
-2.01045	2.32011	1.94745	-2.131	2.53303	1.97073	-2.07756	2.38382	1.92652	-2.23265	2.35392	1.75603
-1.98084	2.37689	1.96531	-2.12005	2.49946	1.96185	-2.08217	2.34936	1.91788	-2.19442	2.4126	1.78395
-1.96378	2.3873	1.96472	-2.09983	2.53431	1.97165	NaN	NaN	NaN	NaN	NaN	NaN
-1.94589	2.38359	1.96452	-2.06839	2.57938	1.98504	NaN	NaN	NaN	NaN	NaN	NaN
-1.91822	2.39169	1.96681	-2.0559	2.55867	1.97887	NaN	NaN	NaN	NaN	NaN	NaN
-1.90414	2.38989	1.96446	-2.05876	2.50096	1.97036	NaN	NaN	NaN	NaN	NaN	NaN
-1.89055	2.38481	1.96511	-2.05887	2.4453	1.9648	NaN	NaN	NaN	NaN	NaN	NaN
-1.89023	2.35582	1.9655	-2.03658	2.46949	1.97144	NaN	NaN	NaN	NaN	NaN	NaN
-1.88979	2.32912	1.96686	-2.03682	2.41214	1.95381	NaN	NaN	NaN	NaN	NaN	NaN
-1.88118	2.32316	1.96456	-2.02422	2.41106	1.95199	NaN	NaN	NaN	NaN	NaN	NaN
-1.86419	2.33795	1.96605	-1.99122	2.45579	1.96491	NaN	NaN	NaN	NaN	NaN	NaN
-1.86167	2.31952	1.96292	-1.96632	2.48393	1.97202	NaN	NaN	NaN	NaN	NaN	NaN
-1.84187	2.33213	1.96459	-1.93489	2.53141	1.98271	NaN	NaN	NaN	NaN	NaN	NaN
-1.83205	2.31587	1.96376	-1.92604	2.49324	1.97582	NaN	NaN	NaN	NaN	NaN	NaN
-1.81494	2.30695	1.96752	-1.90911	2.49443	1.97295	NaN	NaN	NaN	NaN	NaN	NaN
-1.7892	2.32676	1.96603	-1.91877	2.44684	1.9636	NaN	NaN	NaN	NaN	NaN	NaN
-1.76757	2.33764	1.96858	-1.93283	2.39263	1.94638	NaN	NaN	NaN	NaN	NaN	NaN
-1.748	2.33707	1.96805	-1.91393	2.41628	1.95419	NaN	NaN	NaN	NaN	NaN	NaN
-1.74798	2.28895	1.96605	-1.90262	2.38687	1.94717	NaN	NaN	NaN	NaN	NaN	NaN
-1.73225	2.27612	1.96927	-1.88284	2.38606	1.94421	NaN	NaN	NaN	NaN	NaN	NaN
-1.72076	2.26585	1.96456	-1.86746	2.38725	1.94458	NaN	NaN	NaN	NaN	NaN	NaN
-1.70173	2.27522	1.96457	-1.86689	2.35466	1.93269	NaN	NaN	NaN	NaN	NaN	NaN
-1.68562	2.27792	1.96635	-1.85621	2.33572	1.92636	NaN	NaN	NaN	NaN	NaN	NaN
-1.68969	2.26741	1.96484	-1.84292	2.32061	1.92301	NaN	NaN	NaN	NaN	NaN	NaN
-1.67531	2.28419	1.96828	-1.83677	2.27446	1.91119	NaN	NaN	NaN	NaN	NaN	NaN
-1.68406	2.20664	1.95688	-1.81776	2.27644	1.9106	NaN	NaN	NaN	NaN	NaN	NaN
-1.69545	2.13875	1.94917	-1.8108	2.26771	1.90708	NaN	NaN	NaN	NaN	NaN	NaN
-1.67684	2.13949	1.94741	-1.79613	2.26187	1.90543	NaN	NaN	NaN	NaN	NaN	NaN
-1.65238	2.15704	1.95294	-1.7755	2.30475	1.90605	NaN	NaN	NaN	NaN	NaN	NaN
-1.62193	2.17306	1.9506	-1.75489	2.33841	1.90813	NaN	NaN	NaN	NaN	NaN	NaN
-1.62036	2.12827	1.94764	-1.74129	2.30469	1.89808	NaN	NaN	NaN	NaN	NaN	NaN
-1.59495	2.14793	1.94895	-1.72888	2.28364	1.88963	NaN	NaN	NaN	NaN	NaN	NaN
-1.59342	2.11312	1.94022	-1.71232	2.28151	1.8895	NaN	NaN	NaN	NaN	NaN	NaN
-1.58779	2.08513	1.9314	-1.71147	2.27204	1.88713	NaN	NaN	NaN	NaN	NaN	NaN
-1.5766	2.09284	1.93461	-1.70685	2.25914	1.8839	NaN	NaN	NaN	NaN	NaN	NaN
-1.56525	2.0861	1.92937	-1.6818	2.28016	1.88705	NaN	NaN	NaN	NaN	NaN	NaN
-1.54683	2.08072	1.92781	-1.66942	2.26668	1.88627	NaN	NaN	NaN	NaN	NaN	NaN
-1.54734	2.05688	1.93135	-1.66478	2.21518	1.8714	NaN	NaN	NaN	NaN	NaN	NaN
-1.54195	2.02396	1.93175	-1.65094	2.20795	1.86827	NaN	NaN	NaN	NaN	NaN	NaN
-1.51127	2.06459	1.93269	-1.64318	2.21616	1.87159	NaN	NaN	NaN	NaN	NaN	NaN
-1.48953	2.09392	1.93201	-1.6444	2.19551	1.86187	NaN	NaN	NaN	NaN	NaN	NaN
-1.47118	2.10053	1.93446	-1.63666	2.19258	1.85214	NaN	NaN	NaN	NaN	NaN	NaN
-1.4722	2.05129	1.93061	-1.59489	2.2237	1.85363	NaN	NaN	NaN	NaN	NaN	NaN
-1.4629	2.03221	1.93193	-1.57781	2.22087	1.8539	NaN	NaN	NaN	NaN	NaN	NaN
-1.45219	2.02525	1.93263	-1.57514	2.22487	1.85288	NaN	NaN	NaN	NaN	NaN	NaN
-1.43394	2.03421	1.9323	-1.56734	2.21453	1.85072	NaN	NaN	NaN	NaN	NaN	NaN
-1.42439	2.03655	1.93408	-1.54889	2.23342	1.8533	NaN	NaN	NaN	NaN	NaN	NaN
-1.41254	2.03338	1.93011	-1.53096	2.2124	1.84898	NaN	NaN	NaN	NaN	NaN	NaN
-1.40668	1.98799	1.92911	-1.50523	2.23797	1.854	NaN	NaN	NaN	NaN	NaN	NaN
-1.40255	1.95723	1.93474	-1.48639	2.24401	1.85726	NaN	NaN	NaN	NaN	NaN	NaN
-1.36223	1.9944	1.94368	-1.47823	2.20225	1.84471	NaN	NaN	NaN	NaN	NaN	NaN
-1.33735	2.01939	1.95282	-1.46665	2.22213	1.84993	NaN	NaN	NaN	NaN	NaN	NaN
-1.31365	2.05314	1.95124	-1.44796	2.2312	1.85169	NaN	NaN	NaN	NaN	NaN	NaN
-1.31336	2.00338	1.94425	-1.46914	2.11646	1.81979	NaN	NaN	NaN	NaN	NaN	NaN
-1.29269	2.03558	1.95193	-1.45894	2.09397	1.81151	NaN	NaN	NaN	NaN	NaN	NaN
-1.27531	2.02681	1.95209	-1.4531	2.08919	1.81215	NaN	NaN	NaN	NaN	NaN	NaN
-1.27173	1.98947	1.95605	-1.44813	2.06502	1.81668	NaN	NaN	NaN	NaN	NaN	NaN
-1.26301	1.97269	1.9559	-1.44227	2.03449	1.8149	NaN	NaN	NaN	NaN	NaN	NaN
-1.24476	1.97652	1.95504	-1.42267	2.04475	1.817	NaN	NaN	NaN	NaN	NaN	NaN
-1.24488	1.94227	1.9398	-1.41108	1.99	1.81392	NaN	NaN	NaN	NaN	NaN	NaN
-1.24915	1.89103	1.92929	-1.40389	1.97997	1.81832	NaN	NaN	NaN	NaN	NaN	NaN
-1.23998	1.88029	1.92621	-1.3864	1.99219	1.8178	NaN	NaN	NaN	NaN	NaN	NaN
-1.21619	1.88572	1.92739	-1.3826	1.98645	1.81988	NaN	NaN	NaN	NaN	NaN	NaN
-1.18921	1.91393	1.93674	-1.36136	1.98637	1.81897	NaN	NaN	NaN	NaN	NaN	NaN
-1.18158	1.90939	1.93376	-1.34147	1.98394	1.81761	NaN	NaN	NaN	NaN	NaN	NaN
-1.16956	1.91558	1.93367	-1.33122	1.96588	1.81593	NaN	NaN	NaN	NaN	NaN	NaN
-1.16409	1.90734	1.93414	-1.30307	1.99809	1.82207	NaN	NaN	NaN	NaN	NaN	NaN
-1.15063	1.88452	1.93698	-1.28662	1.98233	1.81862	NaN	NaN	NaN	NaN	NaN	NaN
-1.14543	1.84851	1.93778	-1.27283	1.98264	1.82083	NaN	NaN	NaN	NaN	NaN	NaN
-1.12891	1.81809	1.93061	-1.25759	1.98484	1.81973	NaN	NaN	NaN	NaN	NaN	NaN
-1.10027	1.84104	1.93653	-1.24591	1.97529	1.81567	NaN	NaN	NaN	NaN	NaN	NaN
-1.07708	1.88886	1.93779	-1.24129	1.96257	1.82003	NaN	NaN	NaN	NaN	NaN	NaN
-1.07654	1.86664	1.93387	-1.24245	1.91637	1.81534	NaN	NaN	NaN	NaN	NaN	NaN
-1.07593	1.81956	1.9322	-1.21276	1.94727	1.82198	NaN	NaN	NaN	NaN	NaN	NaN
-1.05905	1.83135	1.93205	-1.21086	1.91902	1.81815	NaN	NaN	NaN	NaN	NaN	NaN
-1.03647	1.85851	1.93785	-1.18624	1.93269	1.82201	NaN	NaN	NaN	NaN	NaN	NaN
-1.03147	1.84542	1.93394	-1.16355	1.92502	1.81977	NaN	NaN	NaN	NaN	NaN	NaN
-1.02968	1.81603	1.93492	-1.14252	1.96313	1.82855	NaN	NaN	NaN	NaN	NaN	NaN
-1.01879	1.76968	1.92925	-1.14672	1.92684	1.8278	NaN	NaN	NaN	NaN	NaN	NaN
-0.988726	1.79646	1.93746	-1.1625	1.81957	1.80908	NaN	NaN	NaN	NaN	NaN	NaN
-0.97023	1.79685	1.93905	-1.15251	1.79717	1.80329	NaN	NaN	NaN	NaN	NaN	NaN
-0.945121	1.80773	1.94031	-1.1273	1.80535	1.80501	NaN	NaN	NaN	NaN	NaN	NaN
-0.94172	1.75904	1.92834	-1.10961	1.82539	1.81072	NaN	NaN	NaN	NaN	NaN	NaN
-0.919726	1.78606	1.93421	-1.08625	1.85923	1.81844	NaN	NaN	NaN	NaN	NaN	NaN
-0.906141	1.79207	1.93592	-1.08153	1.86304	1.81931	NaN	NaN	NaN	NaN	NaN	NaN
-0.904457	1.77497	1.92896	-1.0621	1.88073	1.81853	NaN	NaN	NaN	NaN	NaN	NaN
-0.87694	1.79946	1.93312	-1.05826	1.85902	1.81744	NaN	NaN	NaN	NaN	NaN	NaN
-0.859739	1.79637	1.93766	-1.04777	1.84061	1.82073	NaN	NaN	NaN	NaN	NaN	NaN
-0.839246	1.80148	1.93942	-1.0457	1.7903	1.81981	NaN	NaN	NaN	NaN	NaN	NaN
-0.824397	1.80287	1.9383	-1.02114	1.79638	1.81857	NaN	NaN	NaN	NaN	NaN	NaN
-0.80066	1.81564	1.94023	-1.00687	1.77606	1.82345	NaN	NaN	NaN	NaN	NaN	NaN
-0.789106	1.7802	1.93699	-0.999134	1.73414	1.82017	NaN	NaN	NaN	NaN	NaN	NaN
-0.785611	1.72926	1.93902	-0.977354	1.75416	1.83155	NaN	NaN	NaN	NaN	NaN	NaN
-0.77864	1.70187	1.93103	-0.969359	1.75163	1.84091	NaN	NaN	NaN	NaN	NaN	NaN
-0.75006	1.7372	1.93803	-0.961298	1.74735	1.84176	NaN	NaN	NaN	NaN	NaN	NaN
-0.748744	1.70757	1.94026	-0.954992	1.72959	1.83992	NaN	NaN	NaN	NaN	NaN	NaN
-0.744559	1.6863	1.94056	-0.935558	1.71246	1.83184	NaN	NaN	NaN	NaN	NaN	NaN
-0.742047	1.66857	1.93807	-0.930247	1.67561	1.82246	NaN	NaN	NaN	NaN	NaN	NaN
-0.73183	1.64256	1.92447	-0.916088	1.67738	1.81974	NaN	NaN	NaN	NaN	NaN	NaN
-0.733325	1.6045	1.91969	-0.909004	1.64747	1.82306	NaN	NaN	NaN	NaN	NaN	NaN
-0.696673	1.63705	1.92988	-0.905524	1.60233	1.82259	NaN	NaN	NaN	NaN	NaN	NaN
-0.681249	1.61236	1.92198	-0.885883	1.60054	1.82184	NaN	NaN	NaN	NaN	NaN	NaN
-0.653363	1.64558	1.92076	-0.866102	1.61493	1.82437	NaN	NaN	NaN	NaN	NaN	NaN
-0.652494	1.61901	1.9214	-0.847476	1.6147	1.82388	NaN	NaN	NaN	NaN	NaN	NaN
-0.644251	1.61159	1.92237	-0.852811	1.57763	1.82593	NaN	NaN	NaN	NaN	NaN	NaN
-0.628764	1.61291	1.92116	-0.83763	1.58307	1.82379	NaN	NaN	NaN	NaN	NaN	NaN
-0.608198	1.6182	1.92231	-0.829513	1.5528	1.82517	NaN	NaN	NaN	NaN	NaN	NaN
-0.592264	1.61144	1.92019	-0.796131	1.62059	1.83401	NaN	NaN	NaN	NaN	NaN	NaN
-0.573628	1.62615	1.9234	-0.789085	1.61735	1.84376	NaN	NaN	NaN	NaN	NaN	NaN
-0.572297	1.62708	1.91998	-0.767472	1.64671	1.83778	NaN	NaN	NaN	NaN	NaN	NaN
-0.57298	1.56734	1.90576	-0.742656	1.67948	1.83955	NaN	NaN	NaN	NaN	NaN	NaN
-0.553689	1.5587	1.901	-0.729095	1.67971	1.8396	NaN	NaN	NaN	NaN	NaN	NaN
-0.534208	1.54969	1.90195	-0.718315	1.65953	1.84325	NaN	NaN	NaN	NaN	NaN	NaN
-0.515567	1.55131	1.90322	-0.708165	1.62175	1.84365	NaN	NaN	NaN	NaN	NaN	NaN
-0.511104	1.53096	1.89538	-0.686612	1.6248	1.84468	NaN	NaN	NaN	NaN	NaN	NaN
-0.488327	1.555	1.9019	-0.666041	1.63016	1.84526	NaN	NaN	NaN	NaN	NaN	NaN
-0.472226	1.55228	1.90093	-0.653274	1.62703	1.84307	NaN	NaN	NaN	NaN	NaN	NaN
-0.457479	1.53203	1.89448	-0.652951	1.60706	1.84015	NaN	NaN	NaN	NaN	NaN	NaN
-0.42962	1.56174	1.90117	-0.633177	1.6224	1.84257	NaN	NaN	NaN	NaN	NaN	NaN
-0.416323	1.56203	1.90181	-0.604468	1.63052	1.84395	NaN	NaN	NaN	NaN	NaN	NaN
-0.401711	1.56412	1.90194	-0.603526	1.59636	1.84518	NaN	NaN	NaN	NaN	NaN	NaN
-0.396737	1.5395	1.89409	-0.601522	1.55794	1.84443	NaN	NaN	NaN	NaN	NaN	NaN
-0.387213	1.5513	1.8982	-0.592216	1.54235	1.8387	NaN	NaN	NaN	NaN	NaN	NaN
-0.370379	1.57361	1.9012	-0.572469	1.554	1.83967	NaN	NaN	NaN	NaN	NaN	NaN
-0.367828	1.50501	1.88502	-0.543939	1.56489	1.84427	NaN	NaN	NaN	NaN	NaN	NaN
-0.360888	1.48872	1.88214	-0.529207	1.561	1.84343	NaN	NaN	NaN	NaN	NaN	NaN
-0.336182	1.50032	1.88386	-0.536013	1.49973	1.83472	NaN	NaN	NaN	NaN	NaN	NaN
-0.330767	1.40751	1.86633	-0.530674	1.43755	1.82729	NaN	NaN	NaN	NaN	NaN	NaN
-0.326275	1.35596	1.86165	-0.518097	1.43636	1.82657	NaN	NaN	NaN	NaN	NaN	NaN
-0.313204	1.3433	1.85874	-0.494687	1.43435	1.82539	NaN	NaN	NaN	NaN	NaN	NaN
-0.288299	1.36779	1.8638	-0.468012	1.44391	1.82908	NaN	NaN	NaN	NaN	NaN	NaN
-0.269698	1.41132	1.86729	-0.447033	1.43097	1.82719	NaN	NaN	NaN	NaN	NaN	NaN
-0.265897	1.38317	1.86558	-0.426416	1.43586	1.82585	NaN	NaN	NaN	NaN	NaN	NaN
-0.256718	1.38121	1.86537	-0.429237	1.43098	1.82418	NaN	NaN	NaN	NaN	NaN	NaN
-0.244729	1.37513	1.86622	-0.4171	1.43829	1.82288	NaN	NaN	NaN	NaN	NaN	NaN
-0.2151	1.40531	1.86195	-0.404136	1.43808	1.82319	NaN	NaN	NaN	NaN	NaN	NaN
-0.187148	1.42166	1.85723	-0.380075	1.47186	1.83451	NaN	NaN	NaN	NaN	NaN	NaN
-0.167764	1.4283	1.85976	-0.382372	1.40545	1.81473	NaN	NaN	NaN	NaN	NaN	NaN
-0.145516	1.4536	1.8647	-0.377522	1.37348	1.80719	NaN	NaN	NaN	NaN	NaN	NaN
-0.145044	1.38426	1.84771	-0.354866	1.37039	1.8055	NaN	NaN	NaN	NaN	NaN	NaN
-0.127919	1.37586	1.84212	-0.334832	1.37622	1.80715	NaN	NaN	NaN	NaN	NaN	NaN
-0.125311	1.32748	1.84187	-0.315867	1.37805	1.80852	NaN	NaN	NaN	NaN	NaN	NaN
-0.103016	1.35767	1.84729	-0.294376	1.38087	1.80782	NaN	NaN	NaN	NaN	NaN	NaN
-0.08609	1.38627	1.84629	-0.285191	1.37935	1.80808	NaN	NaN	NaN	NaN	NaN	NaN
-0.069452	1.39723	1.84783	-0.285796	1.37391	1.80604	NaN	NaN	NaN	NaN	NaN	NaN
-0.072879	1.32868	1.83628	-0.270052	1.38917	1.80659	NaN	NaN	NaN	NaN	NaN	NaN
-0.064883	1.31544	1.82376	-0.257655	1.37479	1.80462	NaN	NaN	NaN	NaN	NaN	NaN
-0.022724	1.36343	1.83575	-0.222531	1.39123	1.80546	NaN	NaN	NaN	NaN	NaN	NaN
-0.014498	1.32675	1.82611	-0.210595	1.37409	1.8028	NaN	NaN	NaN	NaN	NaN	NaN
-0.021194	1.28289	1.82406	-0.199122	1.37796	1.80287	NaN	NaN	NaN	NaN	NaN	NaN
0.013714	1.36465	1.83732	-0.187631	1.38008	1.80459	NaN	NaN	NaN	NaN	NaN	NaN
0.01661	1.33875	1.82923	-0.161584	1.42373	1.80652	NaN	NaN	NaN	NaN	NaN	NaN
0.029044	1.3347	1.82932	-0.15297	1.39962	1.80828	NaN	NaN	NaN	NaN	NaN	NaN
0.051067	1.33285	1.82769	-0.148711	1.3295	1.78876	NaN	NaN	NaN	NaN	NaN	NaN
0.066823	1.31892	1.82496	-0.134043	1.30463	1.78327	NaN	NaN	NaN	NaN	NaN	NaN
0.06983	1.26904	1.81965	-0.089274	1.39973	1.78791	NaN	NaN	NaN	NaN	NaN	NaN
0.085401	1.24941	1.82423	-0.066537	1.39243	1.7878	NaN	NaN	NaN	NaN	NaN	NaN
0.108237	1.26233	1.82845	-0.045978	1.39657	1.78818	NaN	NaN	NaN	NaN	NaN	NaN
0.127976	1.26375	1.82637	-0.063847	1.29501	1.75749	NaN	NaN	NaN	NaN	NaN	NaN
0.12736	1.20302	1.80881	-0.063449	1.26778	1.74756	NaN	NaN	NaN	NaN	NaN	NaN
0.135807	1.18933	1.80356	-0.05085	1.31459	1.75578	NaN	NaN	NaN	NaN	NaN	NaN
0.16362	1.24005	1.80716	-0.064261	1.2312	1.73763	NaN	NaN	NaN	NaN	NaN	NaN
0.201796	1.30491	1.8182	-0.05285	1.19941	1.72839	NaN	NaN	NaN	NaN	NaN	NaN
0.210161	1.27848	1.81041	-0.002279	1.27625	1.74221	NaN	NaN	NaN	NaN	NaN	NaN
0.226126	1.26529	1.80859	0.018198	1.29275	1.74827	NaN	NaN	NaN	NaN	NaN	NaN
0.245496	1.28514	1.81089	0.061924	1.35653	1.75088	NaN	NaN	NaN	NaN	NaN	NaN
0.255819	1.26232	1.80785	0.060522	1.29848	1.73862	NaN	NaN	NaN	NaN	NaN	NaN
0.28097	1.28645	1.81083	0.076881	1.28981	1.73211	NaN	NaN	NaN	NaN	NaN	NaN
0.286061	1.24962	1.80048	0.072108	1.23917	1.72976	NaN	NaN	NaN	NaN	NaN	NaN
0.278547	1.17486	1.78971	0.09415	1.27412	1.72901	NaN	NaN	NaN	NaN	NaN	NaN
0.277701	1.10221	1.78035	0.119887	1.28423	1.73008	NaN	NaN	NaN	NaN	NaN	NaN
0.291038	1.12189	1.78005	0.137768	1.28242	1.73099	NaN	NaN	NaN	NaN	NaN	NaN
0.314365	1.10228	1.76634	0.163663	1.31635	1.7271	NaN	NaN	NaN	NaN	NaN	NaN
0.353107	1.1698	1.77692	0.192118	1.3477	1.72778	NaN	NaN	NaN	NaN	NaN	NaN
0.363388	1.14611	1.77071	0.214163	1.35156	1.73021	NaN	NaN	NaN	NaN	NaN	NaN
0.371202	1.16423	1.77164	0.238664	1.36592	1.73237	NaN	NaN	NaN	NaN	NaN	NaN
0.391034	1.18641	1.77057	0.241562	1.32245	1.72147	NaN	NaN	NaN	NaN	NaN	NaN
0.397956	1.14884	1.77083	0.246561	1.28457	1.71107	NaN	NaN	NaN	NaN	NaN	NaN
0.414913	1.15592	1.77072	0.249505	1.2581	1.70057	NaN	NaN	NaN	NaN	NaN	NaN
0.433646	1.15102	1.77021	0.252449	1.20533	1.68914	NaN	NaN	NaN	NaN	NaN	NaN
0.4501	1.1158	1.76065	0.260261	1.21342	1.69008	NaN	NaN	NaN	NaN	NaN	NaN
0.469675	1.09304	1.75453	0.286117	1.21757	1.69046	NaN	NaN	NaN	NaN	NaN	NaN
0.491788	1.08759	1.75106	0.300177	1.22837	1.69328	NaN	NaN	NaN	NaN	NaN	NaN
0.508066	1.1138	1.75805	0.317393	1.22232	1.69001	NaN	NaN	NaN	NaN	NaN	NaN
0.517496	1.09869	1.75182	0.339477	1.22904	1.69204	NaN	NaN	NaN	NaN	NaN	NaN
0.528409	1.0917	1.74758	0.339016	1.16643	1.6696	NaN	NaN	NaN	NaN	NaN	NaN
0.540373	1.11569	1.74755	0.355611	1.1564	1.66842	NaN	NaN	NaN	NaN	NaN	NaN
0.562523	1.17636	1.75078	0.37289	1.16038	1.67164	NaN	NaN	NaN	NaN	NaN	NaN
0.576222	1.13272	1.74319	0.399987	1.20659	1.67403	NaN	NaN	NaN	NaN	NaN	NaN
0.602097	1.11856	1.73404	0.423866	1.22989	1.67114	NaN	NaN	NaN	NaN	NaN	NaN
0.609727	1.12864	1.74157	0.454555	1.23322	1.67308	NaN	NaN	NaN	NaN	NaN	NaN
0.617233	1.10139	1.73203	0.456219	1.20899	1.66264	NaN	NaN	NaN	NaN	NaN	NaN
0.630569	1.0998	1.72937	0.441942	1.15105	1.64652	NaN	NaN	NaN	NaN	NaN	NaN
0.642576	1.09787	1.73204	0.448634	1.15506	1.64708	NaN	NaN	NaN	NaN	NaN	NaN
0.668808	1.10253	1.73265	0.473342	1.13108	1.65139	NaN	NaN	NaN	NaN	NaN	NaN
0.692438	1.10168	1.73287	0.494593	1.16742	1.65469	NaN	NaN	NaN	NaN	NaN	NaN
0.702353	1.1113	1.73373	0.510329	1.17178	1.65267	NaN	NaN	NaN	NaN	NaN	NaN
0.717572	1.11081	1.73228	0.520451	1.15484	1.64524	NaN	NaN	NaN	NaN	NaN	NaN
0.721277	1.09533	1.72584	0.538769	1.16928	1.64887	NaN	NaN	NaN	NaN	NaN	NaN
0.729732	1.06119	1.71934	0.550984	1.11714	1.63466	NaN	NaN	NaN	NaN	NaN	NaN
0.74267	1.04461	1.7147	0.567944	1.1096	1.6337	NaN	NaN	NaN	NaN	NaN	NaN
0.776386	1.08371	1.71444	0.59143	1.15236	1.63528	NaN	NaN	NaN	NaN	NaN	NaN
0.803963	1.1097	1.71275	0.614829	1.18773	1.63396	NaN	NaN	NaN	NaN	NaN	NaN
0.806656	1.07122	1.70331	0.610394	1.09971	1.61182	NaN	NaN	NaN	NaN	NaN	NaN
0.830869	1.07058	1.6948	0.636158	1.12057	1.61366	NaN	NaN	NaN	NaN	NaN	NaN
0.846941	1.04967	1.69503	0.648154	1.0832	1.60558	NaN	NaN	NaN	NaN	NaN	NaN
0.869394	1.04485	1.69482	0.659735	1.04884	1.59585	NaN	NaN	NaN	NaN	NaN	NaN
0.880393	1.04175	1.69343	0.671872	1.0408	1.59184	NaN	NaN	NaN	NaN	NaN	NaN
0.891929	1.04718	1.69206	0.675813	1.04609	1.59276	NaN	NaN	NaN	NaN	NaN	NaN
0.901928	1.05358	1.69194	0.696001	1.07027	1.59493	NaN	NaN	NaN	NaN	NaN	NaN
0.908614	1.03334	1.68573	0.716253	1.0682	1.59136	NaN	NaN	NaN	NaN	NaN	NaN
0.930137	1.01288	1.68152	0.733716	1.0699	1.59604	NaN	NaN	NaN	NaN	NaN	NaN
0.9477	0.994844	1.67562	0.755225	1.06502	1.59824	NaN	NaN	NaN	NaN	NaN	NaN
0.965876	0.988341	1.6759	0.767483	1.02114	1.58671	NaN	NaN	NaN	NaN	NaN	NaN
0.984667	1.02619	1.67484	0.796285	1.06357	1.57649	NaN	NaN	NaN	NaN	NaN	NaN
0.999085	1.07934	1.67486	0.809966	1.06099	1.57394	NaN	NaN	NaN	NaN	NaN	NaN
1.01122	1.07568	1.6746	0.816676	1.07408	1.5767	NaN	NaN	NaN	NaN	NaN	NaN
1.02056	1.02553	1.66717	0.832218	1.05772	1.57543	NaN	NaN	NaN	NaN	NaN	NaN
1.05407	1.07236	1.6738	0.85279	1.07401	1.57718	NaN	NaN	NaN	NaN	NaN	NaN
1.08099	1.09834	1.67538	0.870647	1.06684	1.57686	NaN	NaN	NaN	NaN	NaN	NaN
1.08008	1.03812	1.66591	0.891582	1.07228	1.57756	NaN	NaN	NaN	NaN	NaN	NaN
1.07744	0.958071	1.65627	0.922231	1.09725	1.57642	NaN	NaN	NaN	NaN	NaN	NaN
1.07681	0.91325	1.64974	0.922124	1.07111	1.57727	NaN	NaN	NaN	NaN	NaN	NaN
1.10364	0.934635	1.65627	0.932352	1.06149	1.57233	NaN	NaN	NaN	NaN	NaN	NaN
1.11626	0.958034	1.655	0.955566	1.07676	1.56731	NaN	NaN	NaN	NaN	NaN	NaN
1.12648	0.918717	1.64624	0.958171	1.01263	1.55807	NaN	NaN	NaN	NaN	NaN	NaN
1.13399	0.863263	1.63933	0.975062	1.04171	1.5583	NaN	NaN	NaN	NaN	NaN	NaN
1.16325	0.897135	1.63799	0.986894	1.04151	1.55789	NaN	NaN	NaN	NaN	NaN	NaN
1.17667	0.914153	1.64798	1.0042	1.02566	1.5586	NaN	NaN	NaN	NaN	NaN	NaN
1.17741	0.861139	1.6359	1.0112	1.00045	1.55536	NaN	NaN	NaN	NaN	NaN	NaN
1.19728	0.88187	1.64213	1.04243	1.04819	1.55893	NaN	NaN	NaN	NaN	NaN	NaN
1.21202	0.877988	1.63035	1.03651	0.972832	1.54677	NaN	NaN	NaN	NaN	NaN	NaN
1.23578	0.906254	1.6457	1.0491	0.97082	1.53424	NaN	NaN	NaN	NaN	NaN	NaN
1.25014	0.881139	1.63893	1.08347	1.00842	1.53523	NaN	NaN	NaN	NaN	NaN	NaN
1.26475	0.843289	1.62717	1.11054	1.02086	1.53794	NaN	NaN	NaN	NaN	NaN	NaN
1.29602	0.889156	1.6252	1.13082	1.03507	1.53947	NaN	NaN	NaN	NaN	NaN	NaN
1.32776	0.933778	1.62912	1.14549	1.04184	1.5406	NaN	NaN	NaN	NaN	NaN	NaN
1.35274	0.952241	1.63643	1.15619	1.02536	1.53581	NaN	NaN	NaN	NaN	NaN	NaN
1.3667	0.950735	1.63658	1.16991	0.98078	1.52708	NaN	NaN	NaN	NaN	NaN	NaN
1.36847	0.956746	1.63897	1.18157	0.951001	1.5196	NaN	NaN	NaN	NaN	NaN	NaN
1.3808	0.962039	1.63863	1.20185	0.962344	1.51886	NaN	NaN	NaN	NaN	NaN	NaN
1.39309	0.938771	1.62756	1.22522	0.959596	1.51806	NaN	NaN	NaN	NaN	NaN	NaN
1.40807	0.893696	1.6197	1.23951	0.961036	1.51757	NaN	NaN	NaN	NaN	NaN	NaN
1.41706	0.900667	1.6233	1.26374	0.969684	1.5224	NaN	NaN	NaN	NaN	NaN	NaN
1.42642	0.862464	1.61332	1.25971	0.886742	1.49843	NaN	NaN	NaN	NaN	NaN	NaN
1.44272	0.88131	1.61769	1.27578	0.892718	1.49839	NaN	NaN	NaN	NaN	NaN	NaN
1.46716	0.90525	1.62026	1.28564	0.877707	1.49399	NaN	NaN	NaN	NaN	NaN	NaN
1.47402	0.895738	1.62033	1.30388	0.892221	1.49729	NaN	NaN	NaN	NaN	NaN	NaN
1.49274	0.919661	1.62142	1.3266	0.916211	1.5014	NaN	NaN	NaN	NaN	NaN	NaN
1.49542	0.890178	1.61712	1.34834	0.925238	1.50344	NaN	NaN	NaN	NaN	NaN	NaN
1.53011	0.892156	1.61465	1.35911	0.883607	1.49066	NaN	NaN	NaN	NaN	NaN	NaN
1.55065	0.876912	1.61276	1.38241	0.922809	1.49796	NaN	NaN	NaN	NaN	NaN	NaN
1.58048	0.901067	1.62016	1.40166	0.917845	1.50182	NaN	NaN	NaN	NaN	NaN	NaN
1.57681	0.861324	1.6103	1.42947	0.936635	1.50077	NaN	NaN	NaN	NaN	NaN	NaN
1.59968	0.927517	1.61926	1.43792	0.939909	1.50069	NaN	NaN	NaN	NaN	NaN	NaN
1.59953	0.885571	1.61601	1.42863	0.901747	1.49074	NaN	NaN	NaN	NaN	NaN	NaN
1.62129	0.927982	1.62207	1.42043	0.817538	1.47348	NaN	NaN	NaN	NaN	NaN	NaN
1.63768	0.904033	1.61999	1.46249	0.841444	1.47845	NaN	NaN	NaN	NaN	NaN	NaN
1.65309	0.863989	1.611	1.48122	0.824997	1.47982	NaN	NaN	NaN	NaN	NaN	NaN
1.67729	0.892893	1.61949	1.49995	0.874747	1.48214	NaN	NaN	NaN	NaN	NaN	NaN
1.70062	0.914719	1.62146	1.50651	0.869432	1.482	NaN	NaN	NaN	NaN	NaN	NaN
1.71488	0.916252	1.61963	1.51142	0.826514	1.47452	NaN	NaN	NaN	NaN	NaN	NaN
1.72981	0.911698	1.62123	1.54922	0.853908	1.4818	NaN	NaN	NaN	NaN	NaN	NaN
1.72124	0.822377	1.59972	1.56696	0.882716	1.48125	NaN	NaN	NaN	NaN	NaN	NaN
1.73462	0.837481	1.59991	1.57781	0.877462	1.48423	NaN	NaN	NaN	NaN	NaN	NaN
1.74692	0.848478	1.59851	1.59413	0.851993	1.48266	NaN	NaN	NaN	NaN	NaN	NaN
1.75696	0.84451	1.60153	1.60849	0.817645	1.47233	NaN	NaN	NaN	NaN	NaN	NaN
1.75642	0.726089	1.58807	1.62298	0.830573	1.47526	NaN	NaN	NaN	NaN	NaN	NaN
1.77814	0.696848	1.58188	1.64133	0.843647	1.48055	NaN	NaN	NaN	NaN	NaN	NaN
1.80899	0.740473	1.59356	1.67098	0.886589	1.49218	NaN	NaN	NaN	NaN	NaN	NaN
1.83591	0.7731	1.60136	1.69694	0.911874	1.501	NaN	NaN	NaN	NaN	NaN	NaN
1.85428	0.779158	1.60278	1.69329	0.820798	1.47252	NaN	NaN	NaN	NaN	NaN	NaN
1.87207	0.775321	1.60325	1.70713	0.851198	1.48109	NaN	NaN	NaN	NaN	NaN	NaN
1.87482	0.743461	1.59125	1.71497	0.840862	1.47677	NaN	NaN	NaN	NaN	NaN	NaN
1.87854	0.719127	1.58162	1.73572	0.876412	1.48295	NaN	NaN	NaN	NaN	NaN	NaN
1.8796	0.693722	1.57029	1.75564	0.885217	1.48502	NaN	NaN	NaN	NaN	NaN	NaN
1.88418	0.62477	1.56617	1.76972	0.833882	1.47371	NaN	NaN	NaN	NaN	NaN	NaN
1.88087	0.553937	1.55857	1.79116	0.866213	1.48575	NaN	NaN	NaN	NaN	NaN	NaN
1.89903	0.571584	1.56195	1.8124	0.883104	1.4889	NaN	NaN	NaN	NaN	NaN	NaN
1.93764	0.631497	1.57394	1.8185	0.849902	1.47829	NaN	NaN	NaN	NaN	NaN	NaN
1.96095	0.649239	1.58331	1.83218	0.849282	1.47783	NaN	NaN	NaN	NaN	NaN	NaN
1.98155	0.672682	1.58343	1.84708	0.847141	1.4784	NaN	NaN	NaN	NaN	NaN	NaN
1.99126	0.61685	1.57544	1.86408	0.889716	1.48679	NaN	NaN	NaN	NaN	NaN	NaN
2.01802	0.675687	1.58083	1.87323	0.821672	1.47156	NaN	NaN	NaN	NaN	NaN	NaN
2.03857	0.682924	1.58352	1.89104	0.807191	1.46246	NaN	NaN	NaN	NaN	NaN	NaN
2.0457	0.644263	1.58429	1.90017	0.76034	1.46101	NaN	NaN	NaN	NaN	NaN	NaN
2.0662	0.64647	1.58394	1.90539	0.697869	1.45308	NaN	NaN	NaN	NaN	NaN	NaN
2.08688	0.662249	1.58377	1.92381	0.710134	1.46196	NaN	NaN	NaN	NaN	NaN	NaN
2.0964	0.626464	1.57445	1.93664	0.703732	1.46162	NaN	NaN	NaN	NaN	NaN	NaN
2.10186	0.630172	1.5795	1.95296	0.709698	1.4577	NaN	NaN	NaN	NaN	NaN	NaN
2.11533	0.653716	1.57689	1.97754	0.74828	1.46589	NaN	NaN	NaN	NaN	NaN	NaN
2.13936	0.664491	1.58496	2.00084	0.75001	1.46594	NaN	NaN	NaN	NaN	NaN	NaN
2.16426	0.663619	1.58393	2.01329	0.747266	1.46348	NaN	NaN	NaN	NaN	NaN	NaN
2.17632	0.636009	1.58853	2.02791	0.744511	1.46341	NaN	NaN	NaN	NaN	NaN	NaN
2.18484	0.589027	1.58426	2.03943	0.72842	1.45889	NaN	NaN	NaN	NaN	NaN	NaN
2.19966	0.600835	1.58466	2.05135	0.73569	1.46069	NaN	NaN	NaN	NaN	NaN	NaN
2.21137	0.589719	1.58405	2.06696	0.726755	1.46152	NaN	NaN	NaN	NaN	NaN	NaN
2.23196	0.58666	1.58512	2.07756	0.707994	1.46462	NaN	NaN	NaN	NaN	NaN	NaN
2.25105	0.563577	1.57655	2.08616	0.667482	1.46486	NaN	NaN	NaN	NaN	NaN	NaN
2.27457	0.587489	1.58274	2.10404	0.655843	1.4647	NaN	NaN	NaN	NaN	NaN	NaN
2.29358	0.594753	1.58139	2.1312	0.696242	1.47357	NaN	NaN	NaN	NaN	NaN	NaN
2.30024	0.562233	1.58468	2.14832	0.734526	1.48459	NaN	NaN	NaN	NaN	NaN	NaN
2.29994	0.539256	1.58527	2.15418	0.728244	1.47625	NaN	NaN	NaN	NaN	NaN	NaN
2.3145	0.541231	1.57776	2.17098	0.713459	1.47323	NaN	NaN	NaN	NaN	NaN	NaN
2.32383	0.527118	1.58405	2.18217	0.654635	1.46813	NaN	NaN	NaN	NaN	NaN	NaN
2.34792	0.549382	1.58588	2.18724	0.600817	1.46549	NaN	NaN	NaN	NaN	NaN	NaN
2.36967	0.542019	1.5894	2.20141	0.574355	1.46435	NaN	NaN	NaN	NaN	NaN	NaN
2.37912	0.537908	1.58126	2.20721	0.540064	1.46563	NaN	NaN	NaN	NaN	NaN	NaN
2.40336	0.543466	1.58776	2.2205	0.522522	1.46495	NaN	NaN	NaN	NaN	NaN	NaN
2.42433	0.520169	1.5838	2.23594	0.50028	1.46423	NaN	NaN	NaN	NaN	NaN	NaN
2.4533	0.58094	1.59007	2.25378	0.495884	1.46386	NaN	NaN	NaN	NaN	NaN	NaN
2.4579	0.580004	1.58887	2.27027	0.504704	1.47521	NaN	NaN	NaN	NaN	NaN	NaN
2.45761	0.507428	1.58926	2.29052	0.532143	1.48459	NaN	NaN	NaN	NaN	NaN	NaN
2.46914	0.490555	1.58866	2.32296	0.609572	1.48186	NaN	NaN	NaN	NaN	NaN	NaN
2.47399	0.48061	1.58563	2.33539	0.604904	1.47748	NaN	NaN	NaN	NaN	NaN	NaN
2.48392	0.420578	1.58401	2.34808	0.610378	1.48373	NaN	NaN	NaN	NaN	NaN	NaN
2.50408	0.451668	1.58007	2.3624	0.609997	1.48279	NaN	NaN	NaN	NaN	NaN	NaN
2.52383	0.46422	1.58586	2.38226	0.580047	1.47437	NaN	NaN	NaN	NaN	NaN	NaN
2.54467	0.468895	1.58606	2.4092	0.616657	1.48482	NaN	NaN	NaN	NaN	NaN	NaN
2.56639	0.49149	1.59161	2.43643	0.661254	1.49503	NaN	NaN	NaN	NaN	NaN	NaN
2.5854	0.498361	1.58885	2.43375	0.622076	1.48555	NaN	NaN	NaN	NaN	NaN	NaN
2.59946	0.464464	1.58374	2.44576	0.628107	1.48561	NaN	NaN	NaN	NaN	NaN	NaN
2.61664	0.471325	1.58868	2.45577	0.644148	1.48725	NaN	NaN	NaN	NaN	NaN	NaN
2.63618	0.468418	1.58735	2.46175	0.57813	1.48459	NaN	NaN	NaN	NaN	NaN	NaN
2.65698	0.477934	1.58659	2.46804	0.535215	1.48209	NaN	NaN	NaN	NaN	NaN	NaN
2.66995	0.473591	1.58492	2.48384	0.535873	1.47994	NaN	NaN	NaN	NaN	NaN	NaN
2.68402	0.474871	1.58428	2.50295	0.566934	1.48537	NaN	NaN	NaN	NaN	NaN	NaN
2.70377	0.507463	1.58659	2.51668	0.566747	1.4863	NaN	NaN	NaN	NaN	NaN	NaN
2.71531	0.469833	1.58483	2.5323	0.518327	1.48448	NaN	NaN	NaN	NaN	NaN	NaN
2.7233	0.467798	1.58605	2.54559	0.487622	1.48599	NaN	NaN	NaN	NaN	NaN	NaN
2.73701	0.464303	1.58151	2.55911	0.474156	1.48752	NaN	NaN	NaN	NaN	NaN	NaN
2.75907	0.469067	1.58398	2.5862	0.490223	1.48328	NaN	NaN	NaN	NaN	NaN	NaN
2.77915	0.483342	1.58716	2.60725	0.497176	1.48661	NaN	NaN	NaN	NaN	NaN	NaN
2.79991	0.492744	1.58739	2.63371	0.531165	1.49646	NaN	NaN	NaN	NaN	NaN	NaN
2.809	0.453496	1.589	2.6543	0.565364	1.50716	NaN	NaN	NaN	NaN	NaN	NaN
2.81725	0.432699	1.58919	2.65424	0.528371	1.49856	NaN	NaN	NaN	NaN	NaN	NaN
2.82676	0.413286	1.58629	2.67384	0.569894	1.50444	NaN	NaN	NaN	NaN	NaN	NaN
2.85474	0.434079	1.58899	2.6835	0.562046	1.50744	NaN	NaN	NaN	NaN	NaN	NaN
2.86661	0.39461	1.58512	2.69749	0.555686	1.5054	NaN	NaN	NaN	NaN	NaN	NaN
2.88163	0.418271	1.5851	2.69837	0.510807	1.49543	NaN	NaN	NaN	NaN	NaN	NaN
2.8958	0.419576	1.58504	2.72001	0.50945	1.48757	NaN	NaN	NaN	NaN	NaN	NaN
2.90724	0.403024	1.58279	2.73442	0.488958	1.48658	NaN	NaN	NaN	NaN	NaN	NaN
2.91186	0.381265	1.5868	2.74424	0.421258	1.4866	NaN	NaN	NaN	NaN	NaN	NaN
2.92033	0.342032	1.58581	2.76426	0.442536	1.49516	NaN	NaN	NaN	NaN	NaN	NaN
2.93285	0.363774	1.58781	2.7889	0.497093	1.50674	NaN	NaN	NaN	NaN	NaN	NaN
2.96848	0.423078	1.58513	2.81419	0.524824	1.51162	NaN	NaN	NaN	NaN	NaN	NaN
2.98526	0.420407	1.58733	2.81436	0.471878	1.49919	NaN	NaN	NaN	NaN	NaN	NaN
2.99742	0.384143	1.57478	2.83232	0.499644	1.50334	NaN	NaN	NaN	NaN	NaN	NaN
3.01702	0.40669	1.57833	2.84843	0.499957	1.50669	NaN	NaN	NaN	NaN	NaN	NaN
3.0404	0.428565	1.58646	2.85815	0.436059	1.50593	NaN	NaN	NaN	NaN	NaN	NaN
3.06414	0.427119	1.58525	2.86606	0.422763	1.50676	NaN	NaN	NaN	NaN	NaN	NaN
3.08594	0.421304	1.58709	2.87864	0.414688	1.50171	NaN	NaN	NaN	NaN	NaN	NaN
3.10549	0.433892	1.58521	2.89176	0.432547	1.50457	NaN	NaN	NaN	NaN	NaN	NaN
3.10837	0.401877	1.58443	2.9006	0.393889	1.49195	NaN	NaN	NaN	NaN	NaN	NaN
3.11894	0.401327	1.5759	2.90883	0.360845	1.48539	NaN	NaN	NaN	NaN	NaN	NaN
3.13015	0.366437	1.56766	2.93639	0.365957	1.48679	NaN	NaN	NaN	NaN	NaN	NaN
3.14554	0.363683	1.57783	2.96261	0.40075	1.49688	NaN	NaN	NaN	NaN	NaN	NaN
3.16265	0.369197	1.588	2.98741	0.449558	1.50761	NaN	NaN	NaN	NaN	NaN	NaN
3.18297	0.374572	1.59007	3.01126	0.465025	1.51191	NaN	NaN	NaN	NaN	NaN	NaN
3.19524	0.328322	1.57657	3.01987	0.439118	1.5074	NaN	NaN	NaN	NaN	NaN	NaN
3.20946	0.291775	1.56567	3.03985	0.436038	1.50671	NaN	NaN	NaN	NaN	NaN	NaN
3.22223	0.27788	1.56221	3.04955	0.439032	1.50655	NaN	NaN	NaN	NaN	NaN	NaN
3.25633	0.398446	1.58439	3.06232	0.429167	1.50312	NaN	NaN	NaN	NaN	NaN	NaN
3.27007	0.406168	1.59092	3.068	0.405521	1.50629	NaN	NaN	NaN	NaN	NaN	NaN
3.27738	0.345971	1.57875	3.07109	0.360009	1.50155	NaN	NaN	NaN	NaN	NaN	NaN
3.30332	0.361557	1.58208	3.08503	0.384491	1.50187	NaN	NaN	NaN	NaN	NaN	NaN
3.30717	0.332133	1.57705	3.09314	0.389219	1.50558	NaN	NaN	NaN	NaN	NaN	NaN
3.3077	0.296091	1.56472	3.11657	0.380472	1.50555	NaN	NaN	NaN	NaN	NaN	NaN
3.33449	0.335439	1.57515	3.14106	0.380326	1.50804	NaN	NaN	NaN	NaN	NaN	NaN
3.33925	0.301568	1.56722	3.16007	0.376547	1.50751	NaN	NaN	NaN	NaN	NaN	NaN
3.35936	0.310277	1.56756	3.17871	0.385536	1.50703	NaN	NaN	NaN	NaN	NaN	NaN
3.38189	0.320703	1.57027	3.1969	0.385381	1.50727	NaN	NaN	NaN	NaN	NaN	NaN
3.40325	0.31009	1.56617	3.21021	0.378711	1.50601	NaN	NaN	NaN	NaN	NaN	NaN
3.41236	0.267634	1.55598	3.22163	0.350244	1.49718	NaN	NaN	NaN	NaN	NaN	NaN
3.42594	0.237633	1.54659	3.23946	0.376418	1.50595	NaN	NaN	NaN	NaN	NaN	NaN
3.4429	0.273595	1.55524	3.26042	0.393585	1.50787	NaN	NaN	NaN	NaN	NaN	NaN
3.45269	0.243073	1.54936	3.2719	0.315334	1.48675	NaN	NaN	NaN	NaN	NaN	NaN
3.47393	0.254888	1.54822	3.28905	0.314062	1.48424	NaN	NaN	NaN	NaN	NaN	NaN
3.49599	0.266249	1.5513	3.29936	0.295405	1.48038	NaN	NaN	NaN	NaN	NaN	NaN
3.50425	0.284132	1.55782	3.30717	0.298474	1.48291	NaN	NaN	NaN	NaN	NaN	NaN
3.51782	0.32222	1.56699	3.33602	0.333418	1.48818	NaN	NaN	NaN	NaN	NaN	NaN
3.5211	0.255185	1.54797	3.3438	0.332373	1.48847	NaN	NaN	NaN	NaN	NaN	NaN
3.54037	0.243818	1.54716	3.36064	0.314927	1.48701	NaN	NaN	NaN	NaN	NaN	NaN
3.56665	0.233753	1.54786	3.38367	0.323021	1.48769	NaN	NaN	NaN	NaN	NaN	NaN
3.5933	0.259055	1.54773	3.40244	0.321295	1.48718	NaN	NaN	NaN	NaN	NaN	NaN
3.60439	0.241305	1.54624	3.42073	0.306488	1.48644	NaN	NaN	NaN	NaN	NaN	NaN
3.61472	0.23511	1.54305	3.4442	0.324187	1.48711	NaN	NaN	NaN	NaN	NaN	NaN
3.62987	0.271525	1.55013	3.45067	0.332097	1.48906	NaN	NaN	NaN	NaN	NaN	NaN
3.64207	0.245191	1.54617	3.45447	0.306916	1.48263	NaN	NaN	NaN	NaN	NaN	NaN
3.65909	0.260481	1.54474	3.46993	0.304003	1.47673	NaN	NaN	NaN	NaN	NaN	NaN
3.67653	0.235309	1.53541	3.47261	0.265808	1.46592	NaN	NaN	NaN	NaN	NaN	NaN
3.68639	0.185577	1.52619	3.47943	0.251381	1.46191	NaN	NaN	NaN	NaN	NaN	NaN
3.6978	0.189407	1.52713	3.49131	0.247301	1.46477	NaN	NaN	NaN	NaN	NaN	NaN
3.71325	0.20556	1.52968	3.51449	0.274519	1.46995	NaN	NaN	NaN	NaN	NaN	NaN
3.73228	0.23531	1.52939	3.55031	0.30187	1.47803	NaN	NaN	NaN	NaN	NaN	NaN
3.75831	0.275577	1.52842	3.57372	0.334357	1.48931	NaN	NaN	NaN	NaN	NaN	NaN
3.77407	0.257279	1.52534	3.58679	0.329282	1.4863	NaN	NaN	NaN	NaN	NaN	NaN
3.79033	0.280397	1.52854	3.59924	0.298148	1.47754	NaN	NaN	NaN	NaN	NaN	NaN
3.80047	0.214637	1.51435	3.61488	0.257174	1.46695	NaN	NaN	NaN	NaN	NaN	NaN
3.80959	0.155754	1.50683	3.63485	0.25676	1.46439	NaN	NaN	NaN	NaN	NaN	NaN
3.82574	0.137432	1.5071	3.6582	0.268945	1.46788	NaN	NaN	NaN	NaN	NaN	NaN
3.84257	0.161156	1.5082	3.67183	0.27156	1.47004	NaN	NaN	NaN	NaN	NaN	NaN
3.85028	0.159634	1.50466	3.68716	0.274223	1.46662	NaN	NaN	NaN	NaN	NaN	NaN
3.8629	0.213924	1.50677	3.69755	0.26111	1.46154	NaN	NaN	NaN	NaN	NaN	NaN
3.89192	0.247648	1.51636	3.71142	0.262596	1.46394	NaN	NaN	NaN	NaN	NaN	NaN
3.9066	0.221432	1.51029	3.74038	0.287717	1.46949	NaN	NaN	NaN	NaN	NaN	NaN
3.92333	0.210248	1.51052	3.761	0.281559	1.46996	NaN	NaN	NaN	NaN	NaN	NaN
3.93815	0.174912	1.49904	3.75878	0.208534	1.44799	NaN	NaN	NaN	NaN	NaN	NaN
3.95742	0.194188	1.50504	3.76771	0.200035	1.44498	NaN	NaN	NaN	NaN	NaN	NaN
3.97719	0.207506	1.50645	3.78084	0.203605	1.44421	NaN	NaN	NaN	NaN	NaN	NaN
3.98848	0.181441	1.4984	3.78262	0.18148	1.44742	NaN	NaN	NaN	NaN	NaN	NaN
3.99963	0.120346	1.48572	3.80962	0.206479	1.44587	NaN	NaN	NaN	NaN	NaN	NaN
4.02414	0.133943	1.48501	3.8307	0.212306	1.44745	NaN	NaN	NaN	NaN	NaN	NaN
4.05046	0.140764	1.4888	3.85068	0.207788	1.44711	NaN	NaN	NaN	NaN	NaN	NaN
4.05755	0.103922	1.48828	3.86041	0.217834	1.45004	NaN	NaN	NaN	NaN	NaN	NaN
4.06702	0.141788	1.49528	3.87141	0.192186	1.44234	NaN	NaN	NaN	NaN	NaN	NaN
4.0784	0.132641	1.48823	3.89018	0.186334	1.43614	NaN	NaN	NaN	NaN	NaN	NaN
4.0893	0.149406	1.48622	3.90103	0.145556	1.42783	NaN	NaN	NaN	NaN	NaN	NaN
4.10814	0.121705	1.49023	3.9253	0.158281	1.42994	NaN	NaN	NaN	NaN	NaN	NaN
4.13335	0.140123	1.49008	3.9441	0.148658	1.42897	NaN	NaN	NaN	NaN	NaN	NaN
4.1479	0.122182	1.47968	3.96301	0.153041	1.42823	NaN	NaN	NaN	NaN	NaN	NaN
4.16595	0.14358	1.48705	3.98266	0.145915	1.42727	NaN	NaN	NaN	NaN	NaN	NaN
4.18519	0.141514	1.48588	3.99008	0.140476	1.42454	NaN	NaN	NaN	NaN	NaN	NaN
4.20468	0.168332	1.49134	4.00919	0.164635	1.43017	NaN	NaN	NaN	NaN	NaN	NaN
4.21201	0.095871	1.48606	4.02264	0.141866	1.42644	NaN	NaN	NaN	NaN	NaN	NaN
4.22192	0.057341	1.48128	4.03359	0.104018	1.40911	NaN	NaN	NaN	NaN	NaN	NaN
4.25429	0.131619	1.48964	4.05471	0.129483	1.40685	NaN	NaN	NaN	NaN	NaN	NaN
4.27771	0.158689	1.4897	4.07364	0.156882	1.40948	NaN	NaN	NaN	NaN	NaN	NaN
4.29361	0.168646	1.48638	4.09262	0.177237	1.40809	NaN	NaN	NaN	NaN	NaN	NaN
4.29852	0.130265	1.47672	4.10573	0.178523	1.40824	NaN	NaN	NaN	NaN	NaN	NaN
4.30042	0.070203	1.46866	4.12163	0.163526	1.40822	NaN	NaN	NaN	NaN	NaN	NaN
4.31634	0.091427	1.47051	4.14141	0.126884	1.41	NaN	NaN	NaN	NaN	NaN	NaN
4.33489	0.090909	1.46973	4.15894	0.088624	1.40879	NaN	NaN	NaN	NaN	NaN	NaN
4.3615	0.056153	1.4684	4.1706	0.080987	1.40749	NaN	NaN	NaN	NaN	NaN	NaN
4.37817	0.045753	1.46988	4.18755	0.085531	1.40881	NaN	NaN	NaN	NaN	NaN	NaN
4.38589	0.008263	1.4668	4.19977	0.043495	1.39602	NaN	NaN	NaN	NaN	NaN	NaN
4.40957	0.105912	1.47142	4.21247	0.054309	1.3877	NaN	NaN	NaN	NaN	NaN	NaN
4.42445	0.098059	1.46849	4.22072	0.007766	1.38184	NaN	NaN	NaN	NaN	NaN	NaN
4.45033	0.10137	1.47174	4.23917	0.019257	1.38754	NaN	NaN	NaN	NaN	NaN	NaN
4.46984	0.103651	1.47099	4.25014	0.003555	1.38242	NaN	NaN	NaN	NaN	NaN	NaN
4.48687	0.071034	1.46978	4.28013	0.024015	1.38931	NaN	NaN	NaN	NaN	NaN	NaN
4.48975	0.045658	1.4587	4.3009	0.030869	1.38838	NaN	NaN	NaN	NaN	NaN	NaN
4.49438	-0.020301	1.44871	4.3219	0.044806	1.3905	NaN	NaN	NaN	NaN	NaN	NaN
4.51016	-0.008061	1.46334	4.33647	0.036662	1.38949	NaN	NaN	NaN	NaN	NaN	NaN
4.53258	0.059515	1.4679	4.35539	0.038527	1.39073	NaN	NaN	NaN	NaN	NaN	NaN
4.54754	0.033638	1.47113	4.37984	0.074756	1.3907	NaN	NaN	NaN	NaN	NaN	NaN
4.5678	0.035197	1.46999	4.38971	0.013628	1.37844	NaN	NaN	NaN	NaN	NaN	NaN
4.58274	-0.001133	1.4597	4.39817	-0.001936	1.36858	NaN	NaN	NaN	NaN	NaN	NaN
4.59842	-0.042496	1.44837	4.40761	-0.024124	1.36291	NaN	NaN	NaN	NaN	NaN	NaN
4.61703	-0.019323	1.45256	4.43232	0.033226	1.36771	NaN	NaN	NaN	NaN	NaN	NaN
4.62414	-0.057273	1.44829	4.44896	0.042843	1.3673	NaN	NaN	NaN	NaN	NaN	NaN
4.64231	-0.047846	1.4467	4.46594	0.043537	1.36982	NaN	NaN	NaN	NaN	NaN	NaN
4.66114	-0.032071	1.45223	4.49389	0.077843	1.36996	NaN	NaN	NaN	NaN	NaN	NaN
4.68599	-0.025511	1.45134	4.49713	0.047217	1.37037	NaN	NaN	NaN	NaN	NaN	NaN
4.71046	0.046301	1.46521	4.51161	0.032336	1.3634	NaN	NaN	NaN	NaN	NaN	NaN
4.71988	0.006219	1.4597	4.52822	0.008486	1.35774	NaN	NaN	NaN	NaN	NaN	NaN
4.73184	-0.032717	1.44997	4.53542	-0.032166	1.34829	NaN	NaN	NaN	NaN	NaN	NaN
4.74453	-0.034139	1.44717	4.56539	0.027862	1.35146	NaN	NaN	NaN	NaN	NaN	NaN
4.75387	-0.016536	1.45188	4.58974	0.058193	1.35104	NaN	NaN	NaN	NaN	NaN	NaN
4.77385	-0.000242	1.45102	4.60783	0.054464	1.34947	NaN	NaN	NaN	NaN	NaN	NaN
4.79467	-0.021418	1.45652	4.62704	0.052326	1.34851	NaN	NaN	NaN	NaN	NaN	NaN
4.81421	-0.021518	1.45219	4.64299	0.063285	1.34985	NaN	NaN	NaN	NaN	NaN	NaN
4.83125	-0.010823	1.45141	4.66083	0.058037	1.34955	NaN	NaN	NaN	NaN	NaN	NaN
4.84443	-0.055977	1.4449	4.67804	0.045542	1.34998	NaN	NaN	NaN	NaN	NaN	NaN
4.86561	-0.030355	1.44971	4.68988	0.060975	1.34976	NaN	NaN	NaN	NaN	NaN	NaN
4.88826	0.012287	1.4549	4.70276	0.046022	1.34587	NaN	NaN	NaN	NaN	NaN	NaN
4.89546	-0.009016	1.45165	4.72044	0.072623	1.35085	NaN	NaN	NaN	NaN	NaN	NaN
4.91109	-0.023296	1.4549	4.72812	0.048905	1.34392	NaN	NaN	NaN	NaN	NaN	NaN
4.92593	-0.031147	1.46054	4.74291	0.018881	1.33663	NaN	NaN	NaN	NaN	NaN	NaN
4.93979	-0.083244	1.45385	4.75279	-0.0275	1.32966	NaN	NaN	NaN	NaN	NaN	NaN
4.95421	-0.088643	1.45143	4.77476	-0.009259	1.33187	NaN	NaN	NaN	NaN	NaN	NaN
4.9697	-0.038814	1.45302	4.79543	-0.001736	1.33156	NaN	NaN	NaN	NaN	NaN	NaN
4.99175	-0.041632	1.45174	4.81453	-0.002524	1.33041	NaN	NaN	NaN	NaN	NaN	NaN
5.00126	-0.055164	1.45194	4.82883	-0.005236	1.32977	NaN	NaN	NaN	NaN	NaN	NaN
5.0272	-0.07294	1.45314	4.84506	0.006197	1.33024	NaN	NaN	NaN	NaN	NaN	NaN
5.04316	-0.026991	1.45447	4.85873	-0.007957	1.32614	NaN	NaN	NaN	NaN	NaN	NaN
5.06525	-0.00717	1.45054	4.8892	-0.012473	1.32975	NaN	NaN	NaN	NaN	NaN	NaN
5.07761	-0.0355	1.45339	4.91214	-0.033088	1.33078	NaN	NaN	NaN	NaN	NaN	NaN
5.09233	-0.075724	1.45318	4.9233	-0.067148	1.33101	NaN	NaN	NaN	NaN	NaN	NaN
5.10429	-0.091863	1.45012	4.93094	-0.091667	1.32889	NaN	NaN	NaN	NaN	NaN	NaN
5.1291	-0.056621	1.45167	4.94807	-0.043787	1.3249	NaN	NaN	NaN	NaN	NaN	NaN
5.14201	-0.079804	1.45185	4.96571	0.012146	1.33127	NaN	NaN	NaN	NaN	NaN	NaN
5.15889	-0.102215	1.44518	4.97389	0.002353	1.3254	NaN	NaN	NaN	NaN	NaN	NaN
5.17768	-0.03631	1.45067	4.99117	-0.020409	1.32174	NaN	NaN	NaN	NaN	NaN	NaN
5.18399	-0.097726	1.4431	5.01964	-0.030634	1.32866	NaN	NaN	NaN	NaN	NaN	NaN
5.19937	-0.052583	1.4513	5.03423	-0.080479	1.33112	NaN	NaN	NaN	NaN	NaN	NaN
5.21496	-0.115766	1.43875	5.05674	-0.040575	1.33057	NaN	NaN	NaN	NaN	NaN	NaN
5.23494	-0.131466	1.43265	5.07311	-0.053926	1.33078	NaN	NaN	NaN	NaN	NaN	NaN
5.25373	-0.107299	1.43378	5.0931	-0.056415	1.33145	NaN	NaN	NaN	NaN	NaN	NaN
5.26473	-0.151895	1.43109	5.11206	-0.072199	1.32962	NaN	NaN	NaN	NaN	NaN	NaN
5.28205	-0.159822	1.42928	5.1289	-0.05291	1.33203	NaN	NaN	NaN	NaN	NaN	NaN
5.30388	-0.095596	1.44282	5.12802	-0.051841	1.32102	NaN	NaN	NaN	NaN	NaN	NaN
5.32689	-0.097519	1.44149	5.12808	-0.057535	1.31832	NaN	NaN	NaN	NaN	NaN	NaN
5.34515	-0.117385	1.43321	5.13936	-0.134278	1.30363	NaN	NaN	NaN	NaN	NaN	NaN
5.36064	-0.129627	1.43383	5.15234	-0.130772	1.30934	NaN	NaN	NaN	NaN	NaN	NaN
5.3716	-0.13399	1.43284	5.16894	-0.122446	1.30537	NaN	NaN	NaN	NaN	NaN	NaN
5.38265	-0.121108	1.4325	5.18952	-0.113503	1.31195	NaN	NaN	NaN	NaN	NaN	NaN
5.39824	-0.081453	1.4379	5.21985	-0.118023	1.31205	NaN	NaN	NaN	NaN	NaN	NaN
5.41367	-0.151396	1.42714	5.24306	-0.112538	1.3136	NaN	NaN	NaN	NaN	NaN	NaN
5.44615	-0.087686	1.44239	5.26634	-0.101049	1.31393	NaN	NaN	NaN	NaN	NaN	NaN
5.45142	-0.149542	1.4244	5.27117	-0.135467	1.30404	NaN	NaN	NaN	NaN	NaN	NaN
5.46913	-0.106758	1.43685	5.27706	-0.160971	1.29783	NaN	NaN	NaN	NaN	NaN	NaN
5.46663	-0.185812	1.42882	5.28158	-0.233038	1.28016	NaN	NaN	NaN	NaN	NaN	NaN
5.47766	-0.192215	1.42986	5.30611	-0.190497	1.28824	NaN	NaN	NaN	NaN	NaN	NaN
5.49839	-0.234387	1.42267	5.32338	-0.182736	1.29102	NaN	NaN	NaN	NaN	NaN	NaN
5.52244	-0.132142	1.43629	5.34941	-0.129287	1.29119	NaN	NaN	NaN	NaN	NaN	NaN
5.54846	-0.097215	1.43704	5.37256	-0.10024	1.29218	NaN	NaN	NaN	NaN	NaN	NaN
5.54806	-0.197985	1.424	5.37693	-0.168305	1.2906	NaN	NaN	NaN	NaN	NaN	NaN
5.56497	-0.199856	1.42889	5.38946	-0.189784	1.28645	NaN	NaN	NaN	NaN	NaN	NaN
5.57817	-0.180407	1.42472	5.4113	-0.136136	1.29229	NaN	NaN	NaN	NaN	NaN	NaN
5.59507	-0.179745	1.43253	5.43792	-0.145681	1.29175	NaN	NaN	NaN	NaN	NaN	NaN
5.61732	-0.179842	1.41916	5.46134	-0.171505	1.2923	NaN	NaN	NaN	NaN	NaN	NaN
5.63679	-0.203706	1.41428	5.48137	-0.124636	1.29346	NaN	NaN	NaN	NaN	NaN	NaN
5.64463	-0.204878	1.40436	5.48456	-0.144362	1.29233	NaN	NaN	NaN	NaN	NaN	NaN
5.65756	-0.174789	1.41138	5.48896	-0.159856	1.29041	NaN	NaN	NaN	NaN	NaN	NaN
5.67345	-0.188745	1.41202	5.50042	-0.144398	1.28932	NaN	NaN	NaN	NaN	NaN	NaN
5.699	-0.175888	1.41454	5.51032	-0.163151	1.27651	NaN	NaN	NaN	NaN	NaN	NaN
5.71397	-0.208763	1.40315	5.53167	-0.14283	1.27204	NaN	NaN	NaN	NaN	NaN	NaN
5.73267	-0.168687	1.41205	5.55032	-0.144039	1.27231	NaN	NaN	NaN	NaN	NaN	NaN
5.74875	-0.151168	1.41442	5.56819	-0.160293	1.27288	NaN	NaN	NaN	NaN	NaN	NaN
5.74741	-0.254275	1.40316	5.58402	-0.167422	1.27123	NaN	NaN	NaN	NaN	NaN	NaN
5.75922	-0.25183	1.39952	5.60321	-0.154131	1.27256	NaN	NaN	NaN	NaN	NaN	NaN
5.78498	-0.221416	1.39948	5.62776	-0.156806	1.27265	NaN	NaN	NaN	NaN	NaN	NaN
5.79941	-0.244709	1.39357	5.64197	-0.146788	1.27501	NaN	NaN	NaN	NaN	NaN	NaN
5.81034	-0.241425	1.39323	5.65284	-0.15888	1.2703	NaN	NaN	NaN	NaN	NaN	NaN
5.82713	-0.221235	1.39418	5.67348	-0.15539	1.27181	NaN	NaN	NaN	NaN	NaN	NaN
5.84156	-0.232881	1.39463	5.69404	-0.152476	1.2721	NaN	NaN	NaN	NaN	NaN	NaN
5.85936	-0.24333	1.39389	5.71271	-0.16479	1.27088	NaN	NaN	NaN	NaN	NaN	NaN
5.87413	-0.222275	1.39536	5.7238	-0.151339	1.27216	NaN	NaN	NaN	NaN	NaN	NaN
5.88738	-0.222378	1.39517	5.72646	-0.17004	1.2668	NaN	NaN	NaN	NaN	NaN	NaN
5.8907	-0.257837	1.38573	5.74659	-0.134831	1.27116	NaN	NaN	NaN	NaN	NaN	NaN
5.91823	-0.214032	1.38958	5.76124	-0.113416	1.27275	NaN	NaN	NaN	NaN	NaN	NaN
5.93126	-0.222463	1.39447	5.77271	-0.114154	1.27363	NaN	NaN	NaN	NaN	NaN	NaN
5.94477	-0.256244	1.38328	5.79376	-0.153903	1.27222	NaN	NaN	NaN	NaN	NaN	NaN
5.96253	-0.236703	1.39093	5.817	-0.165733	1.27282	NaN	NaN	NaN	NaN	NaN	NaN
5.97179	-0.251034	1.38401	5.83651	-0.174842	1.27262	NaN	NaN	NaN	NaN	NaN	NaN
5.99721	-0.242942	1.39054	5.83323	-0.25746	1.251	NaN	NaN	NaN	NaN	NaN	NaN
6.01406	-0.26641	1.38972	5.83775	-0.289566	1.24388	NaN	NaN	NaN	NaN	NaN	NaN
6.03256	-0.256931	1.38371	5.84449	-0.333182	1.2385	NaN	NaN	NaN	NaN	NaN	NaN
6.04501	-0.232855	1.39194	5.87041	-0.29483	1.23129	NaN	NaN	NaN	NaN	NaN	NaN
6.06269	-0.244067	1.39157	5.89961	-0.298097	1.23015	NaN	NaN	NaN	NaN	NaN	NaN
6.08475	-0.269832	1.3818	5.92064	-0.272572	1.23466	NaN	NaN	NaN	NaN	NaN	NaN
6.09391	-0.255603	1.37477	5.92568	-0.285314	1.23075	NaN	NaN	NaN	NaN	NaN	NaN
6.11042	-0.252067	1.3722	5.94458	-0.262546	1.23181	NaN	NaN	NaN	NaN	NaN	NaN
6.12997	-0.218146	1.37423	5.96521	-0.241917	1.23142	NaN	NaN	NaN	NaN	NaN	NaN
6.14728	-0.218988	1.37552	5.96425	-0.25719	1.23171	NaN	NaN	NaN	NaN	NaN	NaN
6.16075	-0.232828	1.37363	5.97555	-0.301731	1.22632	NaN	NaN	NaN	NaN	NaN	NaN
6.16952	-0.260112	1.36748	5.99047	-0.274214	1.23307	NaN	NaN	NaN	NaN	NaN	NaN
6.18036	-0.265994	1.36322	6.01012	-0.280318	1.23228	NaN	NaN	NaN	NaN	NaN	NaN
6.19068	-0.328777	1.35366	6.0292	-0.279649	1.23194	NaN	NaN	NaN	NaN	NaN	NaN
6.21543	-0.35457	1.35363	6.04981	-0.23343	1.23114	NaN	NaN	NaN	NaN	NaN	NaN
6.234	-0.304433	1.35471	6.06954	-0.176041	1.2324	NaN	NaN	NaN	NaN	NaN	NaN
6.25616	-0.289894	1.35443	6.07848	-0.194432	1.2323	NaN	NaN	NaN	NaN	NaN	NaN
6.26734	-0.292423	1.35368	6.08975	-0.226385	1.2256	NaN	NaN	NaN	NaN	NaN	NaN
6.28472	-0.253332	1.35838	6.10344	-0.235929	1.23106	NaN	NaN	NaN	NaN	NaN	NaN
6.29885	-0.301987	1.35433	6.11495	-0.285167	1.22708	NaN	NaN	NaN	NaN	NaN	NaN
6.31422	-0.284455	1.35179	6.14455	-0.254038	1.23066	NaN	NaN	NaN	NaN	NaN	NaN
6.32823	-0.296016	1.34548	6.1592	-0.280985	1.2163	NaN	NaN	NaN	NaN	NaN	NaN
6.34539	-0.287599	1.35248	6.17504	-0.249528	1.21619	NaN	NaN	NaN	NaN	NaN	NaN
6.3575	-0.287055	1.35374	6.18497	-0.292677	1.21144	NaN	NaN	NaN	NaN	NaN	NaN
6.36681	-0.275981	1.34406	6.20609	-0.277465	1.21281	NaN	NaN	NaN	NaN	NaN	NaN
6.38068	-0.304905	1.34237	6.22986	-0.267007	1.2093	NaN	NaN	NaN	NaN	NaN	NaN
6.38785	-0.333745	1.33311	6.23345	-0.263061	1.21057	NaN	NaN	NaN	NaN	NaN	NaN
6.40816	-0.373665	1.33442	6.24718	-0.251389	1.20725	NaN	NaN	NaN	NaN	NaN	NaN
6.42846	-0.328304	1.33447	6.26351	-0.189876	1.21285	NaN	NaN	NaN	NaN	NaN	NaN
6.44621	-0.346582	1.33426	6.27628	-0.243502	1.20679	NaN	NaN	NaN	NaN	NaN	NaN
6.46558	-0.380681	1.3254	6.28671	-0.255216	1.21324	NaN	NaN	NaN	NaN	NaN	NaN
6.47645	-0.344803	1.33312	6.30376	-0.313807	1.21224	NaN	NaN	NaN	NaN	NaN	NaN
6.48452	-0.353171	1.32537	6.32028	-0.308022	1.21457	NaN	NaN	NaN	NaN	NaN	NaN
6.49148	-0.347503	1.32848	6.33187	-0.325756	1.21245	NaN	NaN	NaN	NaN	NaN	NaN
6.50359	-0.326189	1.32719	6.35135	-0.260593	1.2112	NaN	NaN	NaN	NaN	NaN	NaN
6.52555	-0.323225	1.33399	6.35767	-0.265825	1.1933	NaN	NaN	NaN	NaN	NaN	NaN
6.53731	-0.33987	1.33375	6.37145	-0.249911	1.18737	NaN	NaN	NaN	NaN	NaN	NaN
6.55069	-0.365114	1.32391	6.39205	-0.27164	1.18561	6.45452	-0.364825	1.28158	6.31575	-0.222245	1.37118
6.57027	-0.379877	1.32085	6.41604	-0.249762	1.19014	6.46243	-0.343766	1.29812	6.29996	-0.308848	1.39069
6.57355	-0.416055	1.31272	6.42795	-0.258831	1.18665	6.4796	-0.33116	1.28984	6.35936	-0.077102	1.38498
6.58988	-0.382299	1.31478	6.43576	-0.234253	1.19297	6.49095	-0.340286	1.29044	6.42819	0.166485	1.37287
6.61103	-0.398834	1.31415	6.4494	-0.292264	1.18258	6.50882	-0.324859	1.29427	6.50471	-0.073301	1.29312
6.61989	-0.425662	1.30691	6.46661	-0.252925	1.18947	6.52841	-0.331591	1.29164	6.59307	-0.147691	1.25995
6.63821	-0.389867	1.30735	6.48667	-0.26408	1.18661	6.54724	-0.373293	1.28108	6.68943	-0.135973	1.26695
6.65864	-0.37315	1.31749	6.49815	-0.290668	1.18825	6.56477	-0.392399	1.27491	6.74443	-0.137526	1.28693
6.67289	-0.384699	1.31972	6.50591	-0.310851	1.19259	6.58621	-0.360923	1.28454	6.73469	-0.372503	1.25235
6.67715	-0.431729	1.30338	6.52528	-0.354537	1.17663	6.59242	-0.391614	1.27315	6.65503	-0.328328	1.23912
6.68856	-0.388205	1.30589	6.54534	-0.359498	1.17405	6.61327	-0.296937	1.28051	6.63235	-0.148014	1.24707
6.70689	-0.394983	1.30796	6.56626	-0.302897	1.17602	6.6075	-0.347185	1.272	6.57812	-0.138871	1.26674
6.72499	-0.366983	1.31407	6.57217	-0.296334	1.17137	6.6126	-0.325817	1.27215	6.50856	-0.22646	1.29228
6.7389	-0.39062	1.31419	6.58638	-0.311905	1.16986	6.63024	-0.306903	1.27175	6.48334	-0.135441	1.37197
6.76225	-0.326324	1.3154	6.60583	-0.31048	1.17014	6.64157	-0.313965	1.2748	6.50918	-0.224219	1.35188
6.78414	-0.31978	1.31469	6.6239	-0.315645	1.16811	6.67062	-0.316781	1.27266	6.53815	-0.001354	1.36605
6.79827	-0.343609	1.31645	6.63576	-0.298708	1.17155	6.68754	-0.375348	1.26276	6.58353	-0.048058	1.31992
6.80199	-0.449051	1.29491	6.65359	-0.287354	1.17315	6.70562	-0.358783	1.267	6.6692	-0.185336	1.25334
6.80774	-0.429951	1.29035	6.66633	-0.317537	1.16665	6.7271	-0.34736	1.26409	6.78933	-0.032538	1.24157
6.81937	-0.42187	1.2839	6.67173	-0.377413	1.15162	6.75831	-0.287507	1.28614	6.89396	-0.063696	1.26807
6.83856	-0.386439	1.29171	6.68092	-0.369458	1.14684	6.75346	-0.311201	1.27937	6.91078	-0.199966	1.26072
6.86181	-0.374892	1.29633	6.68601	-0.415908	1.13785	6.76741	-0.305636	1.2712	6.91297	-0.102626	1.26138
6.87458	-0.384118	1.29285	6.70275	-0.443179	1.135	6.77839	-0.354976	1.26913	6.87821	-0.258843	1.23372
6.89001	-0.400124	1.28365	6.72692	-0.46219	1.13246	6.79193	-0.301225	1.26296	6.81712	-0.135193	1.22127
6.89793	-0.430411	1.28839	6.7382	-0.434831	1.13356	6.80375	-0.324255	1.25451	6.76521	-0.077418	1.25454
6.91374	-0.412989	1.29486	6.75338	-0.444989	1.13023	6.83347	-0.332405	1.25296	6.70211	-0.100854	1.28704
6.93414	-0.370199	1.29516	6.77235	-0.417475	1.1322	6.84469	-0.325149	1.25524	6.68317	-0.175889	1.3196
6.95496	-0.371778	1.29522	6.78388	-0.401145	1.14178	6.85247	-0.364003	1.24443	6.67777	-0.274782	1.34559
6.97238	-0.342653	1.29565	6.79554	-0.348976	1.1523	6.88008	-0.303368	1.25001	6.74398	-0.149002	1.32651
6.98	-0.386731	1.28565	6.80779	-0.363031	1.14997	6.90703	-0.340486	1.24375	6.78978	-0.052678	1.28778
6.99197	-0.354737	1.29401	6.82799	-0.447147	1.137	6.9225	-0.325125	1.25387	6.89332	-0.188751	1.22107
7.00326	-0.433415	1.28973	6.84392	-0.515443	1.13009	6.92394	-0.366686	1.24219	6.98985	-0.25027	1.20123
7.02191	-0.412042	1.29664	6.8537	-0.513959	1.1301	6.93815	-0.40049	1.23288	7.07112	-0.207339	1.2283
7.02698	-0.476759	1.27527	6.86965	-0.482847	1.13128	6.9348	-0.400426	1.23286	7.12644	-0.2782	1.26749
7.03955	-0.466386	1.27313	6.88302	-0.491725	1.13124	6.96716	-0.392735	1.24052	7.1501	-0.151164	1.28158
7.05384	-0.455831	1.26878	6.89006	-0.482112	1.13196	6.97609	-0.428719	1.23053	7.11353	-0.210774	1.22815
7.07057	-0.44097	1.26747	6.89893	-0.528927	1.12397	6.99326	-0.424425	1.23121	7.04015	-0.162128	1.18871
7.08318	-0.415035	1.27624	6.91958	-0.458243	1.13088	7.00261	-0.45016	1.22922	6.98703	-0.119193	1.22854
7.10071	-0.449472	1.26792	6.9308	-0.452075	1.12587	7.02306	-0.347216	1.23329	6.89327	-0.137512	1.26771
7.11946	-0.441122	1.27333	6.95206	-0.397107	1.13382	7.02459	-0.35101	1.23224	6.85487	-0.247806	1.30665
7.13816	-0.391601	1.27613	6.9665	-0.381516	1.13707	7.03421	-0.35144	1.23228	6.84879	-0.512696	1.33211
7.14372	-0.418673	1.27518	6.96902	-0.444611	1.12116	7.05157	-0.347109	1.2338	6.90157	-0.327704	1.31954
7.15519	-0.430457	1.27026	6.97907	-0.447059	1.12445	7.06651	-0.39618	1.22312	6.94716	-0.135997	1.28256
7.1696	-0.461527	1.265	6.99895	-0.471244	1.1161	7.09163	-0.392218	1.22361	7.02098	-0.092243	1.27362
7.18804	-0.428435	1.27406	7.02051	-0.488387	1.1113	7.10602	-0.354019	1.23376	7.08817	-0.172394	1.23851
7.20155	-0.416841	1.27212	7.04406	-0.507437	1.10913	7.11726	-0.434801	1.21915	7.15706	-0.355313	1.20732
7.2139	-0.446923	1.27095	7.05629	-0.439136	1.11481	7.12006	-0.456511	1.2131	7.24414	-0.058319	1.27998
7.22645	-0.462544	1.26683	7.06735	-0.477691	1.10625	7.12507	-0.450391	1.21493	7.26577	0.005471	1.31516
7.23639	-0.472624	1.26093	7.07104	-0.464811	1.11171	7.1429	-0.426517	1.20904	7.26042	-0.242517	1.23923
7.24382	-0.461507	1.25852	7.08209	-0.479535	1.11262	7.16169	-0.452099	1.21333	7.20458	-0.26815	1.20408
7.25095	-0.510361	1.24842	7.09622	-0.477798	1.10659	7.16202	-0.464242	1.20992	7.13511	-0.29729	1.2188
7.2729	-0.52871	1.24776	7.11005	-0.489135	1.11122	7.18439	-0.393559	1.21019	7.05578	-0.143763	1.25897
7.28686	-0.493249	1.25458	7.13911	-0.47258	1.11372	7.19422	-0.422183	1.20236	7.05265	-0.175859	1.28346
7.30473	-0.452701	1.25549	7.1586	-0.46955	1.11546	7.20311	-0.521172	1.19359	7.02443	-0.547888	1.29118
7.31689	-0.480463	1.25534	7.1575	-0.481561	1.10122	7.21599	-0.470848	1.20364	7.07474	-0.320436	1.28764
7.33955	-0.472613	1.25628	7.16608	-0.448799	1.10446	7.23267	-0.456298	1.21303	7.12932	-0.269472	1.25837
7.35223	-0.521103	1.2366	7.18485	-0.427071	1.10556	7.24519	-0.473058	1.20946	7.2038	-0.315461	1.21881
7.36561	-0.545263	1.2324	7.20062	-0.459951	1.09549	7.26253	-0.465158	1.21021	7.30052	-0.209286	1.20509
7.37963	-0.512614	1.22982	7.2123	-0.524172	1.08914	7.28882	-0.499381	1.20243	7.39144	-0.339025	1.18452
7.38652	-0.490534	1.23508	7.22499	-0.571116	1.08401	7.3071	-0.526002	1.2029	7.45155	-0.341895	1.2142
7.40004	-0.485159	1.23679	7.24939	-0.448472	1.09843	7.32654	-0.477826	1.20703	7.48843	-0.200719	1.25999
7.41967	-0.473136	1.23387	7.25981	-0.455293	1.08754	7.32591	-0.510746	1.20678	7.46409	-0.368376	1.19415
7.43913	-0.458243	1.23547	7.27498	-0.422133	1.08815	7.32899	-0.480297	1.20999	7.43514	-0.276758	1.18478
7.44167	-0.535711	1.22594	7.29009	-0.385706	1.09554	7.34755	-0.518726	1.20005	7.34983	-0.353711	1.1692
7.45388	-0.502389	1.21952	7.29784	-0.394827	1.08792	7.36334	-0.557802	1.19259	7.24667	-0.285463	1.23379
7.46997	-0.480389	1.22892	7.31291	-0.384559	1.09379	7.37662	-0.54662	1.19294	7.2093	-0.500753	1.26204
7.4803	-0.472123	1.23044	7.33367	-0.383862	1.09469	7.39405	-0.515826	1.19431	7.22414	-0.417554	1.28764
7.49344	-0.477475	1.23576	7.35353	-0.384544	1.09353	7.40251	-0.542857	1.19207	7.26803	-0.298165	1.30838
7.51298	-0.481846	1.23416	7.36214	-0.386739	1.09211	7.4239	-0.508864	1.19298	7.30448	-0.341193	1.25867
7.52406	-0.474181	1.22589	7.37217	-0.389433	1.09151	7.44131	-0.480134	1.19326	7.39937	-0.370653	1.21883
7.53277	-0.480274	1.23322	7.3853	-0.406996	1.0867	7.45689	-0.483226	1.19412	7.47444	-0.466263	1.18363
7.55032	-0.44299	1.23192	7.40474	-0.383574	1.09235	7.47512	-0.474829	1.19304	7.55553	-0.34515	1.18007
7.56759	-0.436309	1.221	7.4246	-0.382021	1.09285	7.49446	-0.469722	1.19397	7.61577	-0.344169	1.20478
7.57519	-0.469157	1.21649	7.41969	-0.455396	1.08318	7.51508	-0.429478	1.19518	7.66621	-0.28176	1.24015
7.58098	-0.511334	1.20823	7.42617	-0.444262	1.09066	7.52319	-0.476702	1.19478	7.68453	-0.27064	1.2253
7.59196	-0.435259	1.22088	7.43449	-0.462764	1.08539	7.5305	-0.476314	1.1948	7.62765	-0.31736	1.20006
7.60495	-0.441343	1.21537	7.4456	-0.455463	1.08673	7.52987	-0.482538	1.18475	7.55201	-0.269868	1.19034
7.62343	-0.50908	1.2142	7.46316	-0.486248	1.08508	7.52746	-0.46609	1.18181	7.45016	-0.315744	1.20944
7.64823	-0.562257	1.20893	7.4844	-0.563252	1.06157	7.53426	-0.428299	1.18093	7.40284	-0.388916	1.23849
7.66258	-0.535507	1.22095	7.49394	-0.53101	1.07135	7.54917	-0.462117	1.1754	7.41231	-0.46133	1.27292
7.68256	-0.524359	1.21943	7.50652	-0.513536	1.07199	7.56544	-0.474213	1.18274	7.4305	-0.485395	1.27784
7.68575	-0.53757	1.21506	7.52734	-0.487863	1.07153	7.58205	-0.526326	1.17886	7.45887	-0.55957	1.23756
7.70103	-0.535729	1.21188	7.54056	-0.499184	1.07103	7.59492	-0.525454	1.17382	7.56133	-0.431113	1.19897
7.71756	-0.531081	1.21751	7.54579	-0.512025	1.07132	7.60599	-0.560235	1.16828	7.61822	-0.471608	1.16874
7.73612	-0.569412	1.20523	7.5593	-0.563632	1.06202	7.6304	-0.539048	1.17325	7.69689	-0.368818	1.16528
7.75558	-0.520682	1.21178	7.57131	-0.54473	1.06576	7.6466	-0.540496	1.17213	7.78752	-0.415979	1.1803
7.77381	-0.499854	1.21688	7.59026	-0.547261	1.06497	7.66444	-0.534249	1.17366	7.84774	-0.406002	1.21996
7.78854	-0.528881	1.2173	7.61472	-0.475702	1.07383	7.68758	-0.484575	1.17621	7.8663	-0.425827	1.21993
7.78367	-0.464464	1.21779	7.6334	-0.492266	1.07329	7.69226	-0.485846	1.17596	7.78736	-0.39943	1.17484
7.79204	-0.482635	1.21045	7.63835	-0.531102	1.06608	7.69635	-0.484017	1.17657	7.72165	-0.468803	1.14923
7.80399	-0.475309	1.21149	7.63809	-0.465566	1.06561	7.70226	-0.527348	1.17048	7.65943	-0.336408	1.20005
7.82974	-0.509883	1.2002	7.6595	-0.448204	1.05474	7.71064	-0.521139	1.17359	7.58746	-0.316872	1.24452
7.84658	-0.519966	1.19561	7.67747	-0.426743	1.05338	7.73581	-0.541095	1.1722	7.58159	-0.4023	1.26883
7.85664	-0.521065	1.19636	7.68866	-0.501019	1.05216	7.75238	-0.532521	1.17506	7.59341	-0.515304	1.27316
7.85986	-0.560104	1.18464	7.70228	-0.527753	1.05111	7.76861	-0.576605	1.1608	7.61639	-0.522969	1.2333
7.86909	-0.529639	1.18861	7.71688	-0.522278	1.04841	7.78638	-0.589791	1.15435	7.728	-0.341063	1.19062
7.88223	-0.511826	1.19881	7.72932	-0.427368	1.06438	7.80732	-0.559416	1.16412	7.80503	-0.440726	1.15505
7.89416	-0.511728	1.19597	7.73492	-0.392351	1.06964	7.81769	-0.461115	1.17325	7.88297	-0.526629	1.12945
7.90775	-0.579272	1.17889	7.75131	-0.452481	1.06233	7.838	-0.520147	1.16371	7.94578	-0.515217	1.14983
7.92101	-0.599943	1.17468	7.76058	-0.452366	1.07095	7.84412	-0.512054	1.16728	7.98549	-0.520366	1.18474
7.93607	-0.589739	1.17601	7.775	-0.494876	1.06609	7.8539	-0.533826	1.171	8.02355	-0.406229	1.21067
7.95123	-0.555933	1.1847	7.79487	-0.470365	1.06272	7.87017	-0.504533	1.16419	7.9993	-0.533682	1.14983
7.96757	-0.47823	1.19825	7.81257	-0.412962	1.07718	7.87295	-0.489272	1.16537	7.93636	-0.453479	1.12529
7.97745	-0.508839	1.19271	7.8239	-0.447564	1.06853	7.87635	-0.467333	1.17167	7.84678	-0.467714	1.13484
7.99174	-0.5403	1.19376	7.8358	-0.490897	1.05445	7.88723	-0.437243	1.17146	7.77212	-0.462106	1.17977
8.00997	-0.528097	1.18847	7.85285	-0.466976	1.05925	7.90745	-0.476259	1.16148	7.74847	-0.494453	1.21416
8.02069	-0.516022	1.194	7.86326	-0.494147	1.05468	7.91865	-0.509667	1.1556	7.74397	-0.517308	1.23878
8.03507	-0.553482	1.18591	7.87202	-0.486961	1.05296	7.93841	-0.51581	1.15479	7.77854	-0.547635	1.25377
8.04592	-0.515345	1.19443	7.88739	-0.488514	1.05404	7.94901	-0.502255	1.15596	7.8269	-0.502109	1.20444
8.05719	-0.494358	1.19464	7.8887	-0.495801	1.04557	7.95825	-0.488748	1.1549	7.90611	-0.471444	1.14499
8.06737	-0.509132	1.19517	7.90376	-0.555965	1.03689	7.96906	-0.532643	1.14923	7.99451	-0.510331	1.12003
8.08005	-0.553495	1.18172	7.92641	-0.536043	1.03216	7.98527	-0.516829	1.15417	8.09014	-0.600113	1.10461
8.09781	-0.590742	1.17446	7.93936	-0.487066	1.04151	8.00409	-0.533721	1.14686	8.17612	-0.468799	1.16584
8.11253	-0.579739	1.17663	7.94991	-0.498371	1.02955	8.01847	-0.540499	1.14161	8.21525	-0.406042	1.20138
8.11969	-0.613571	1.16611	7.96565	-0.57019	1.02606	8.02851	-0.546324	1.14021	8.21176	-0.572131	1.1601
8.12934	-0.558906	1.1744	7.97696	-0.557581	1.03321	8.0445	-0.564277	1.13544	8.16208	-0.527439	1.13051
8.13796	-0.559903	1.17053	7.9797	-0.568912	1.02862	8.04437	-0.544271	1.13684	8.08291	-0.340027	1.13695
8.15358	-0.552445	1.177	7.98881	-0.563788	1.02544	8.0574	-0.556659	1.13415	8.01553	-0.362593	1.16156
8.15983	-0.603402	1.16696	8.0023	-0.588672	1.0249	8.06924	-0.590691	1.12998	7.98477	-0.263247	1.2216
8.17216	-0.571574	1.17218	8.01987	-0.57635	1.02865	8.08561	-0.575414	1.13453	7.95695	-0.401382	1.22021
8.17611	-0.62862	1.16108	8.035	-0.555184	1.03381	8.10118	-0.582227	1.13254	7.96758	-0.43666	1.24
8.18601	-0.64607	1.1509	8.04384	-0.556319	1.03186	8.11578	-0.567386	1.13401	7.98742	-0.455648	1.21523
8.20742	-0.617926	1.16307	8.0618	-0.625671	1.01049	8.13085	-0.573665	1.13145	8.06206	-0.372419	1.17119
8.22087	-0.638449	1.1539	8.06896	-0.658364	1.00255	8.1427	-0.532897	1.13392	8.11601	-0.448501	1.13068
8.24506	-0.598716	1.16687	8.08698	-0.633348	1.00679	8.15004	-0.511702	1.14174	8.20328	-0.504385	1.10591
8.26196	-0.58432	1.17588	8.09654	-0.654713	1.00218	8.17378	-0.50865	1.14241	8.28952	-0.506999	1.1161
8.27213	-0.609175	1.16588	8.10596	-0.685603	1.00428	8.18975	-0.566774	1.13395	8.35806	-0.387584	1.16206
8.27915	-0.579982	1.17292	8.11712	-0.68953	1.00447	8.20795	-0.597975	1.1359	8.37013	-0.366228	1.16746
8.28789	-0.571142	1.16975	8.12897	-0.646841	1.01101	8.21444	-0.558675	1.13541	8.34507	-0.597635	1.12557
8.29843	-0.584081	1.1668	8.13773	-0.635109	1.00669	8.22102	-0.559073	1.13196	8.31858	-0.501678	1.08107
8.30668	-0.603076	1.16095	8.14939	-0.594326	1.01276	8.22491	-0.547603	1.13007	8.22682	-0.484541	1.10588
8.32931	-0.624975	1.16009	8.16839	-0.635177	1.00493	8.22873	-0.542355	1.1314	8.16774	-0.318897	1.16692
8.35159	-0.6565	1.14965	8.18842	-0.617963	1.01317	8.24967	-0.572005	1.13186	8.09715	-0.371534	1.20119
8.36205	-0.638969	1.15485	8.19865	-0.616746	1.01377	8.264	-0.501248	1.14994	8.09524	-0.441733	1.22986
8.37153	-0.656495	1.14548	8.21353	-0.598323	1.00743	NaN	NaN	NaN	NaN	NaN	NaN
8.38229	-0.643339	1.15283	8.23286	-0.614136	1.0118	NaN	NaN	NaN	NaN	NaN	NaN
8.39356	-0.631129	1.15032	8.25488	-0.579733	1.0101	NaN	NaN	NaN	NaN	NaN	NaN
8.40343	-0.621191	1.15618	8.24844	-0.590108	1.01272	NaN	NaN	NaN	NaN	NaN	NaN
8.41256	-0.652278	1.1504	8.26389	-0.641548	1.00585	NaN	NaN	NaN	NaN	NaN	NaN
8.42528	-0.674334	1.14529	8.27948	-0.614453	1.01182	NaN	NaN	NaN	NaN	NaN	NaN
8.43977	-0.625009	1.15295	8.28923	-0.631582	1.00557	NaN	NaN	NaN	NaN	NaN	NaN
8.45419	-0.632082	1.15494	8.30635	-0.59788	1.01258	NaN	NaN	NaN	NaN	NaN	NaN
8.45838	-0.628728	1.14824	8.31359	-0.67708	0.991657	NaN	NaN	NaN	NaN	NaN	NaN
8.46649	-0.649407	1.14116	8.32672	-0.621249	0.988202	NaN	NaN	NaN	NaN	NaN	NaN
8.47909	-0.648469	1.13001	8.33514	-0.638767	0.986119	NaN	NaN	NaN	NaN	NaN	NaN
8.49747	-0.673148	1.1321	8.34729	-0.593388	0.993305	NaN	NaN	NaN	NaN	NaN	NaN
8.51216	-0.658114	1.13576	8.36462	-0.603584	0.993406	NaN	NaN	NaN	NaN	NaN	NaN
8.52684	-0.697194	1.13579	8.37324	-0.605563	0.991879	NaN	NaN	NaN	NaN	NaN	NaN
8.54279	-0.667578	1.13527	8.38202	-0.615996	0.988081	NaN	NaN	NaN	NaN	NaN	NaN
8.55366	-0.672575	1.13565	8.39448	-0.605809	0.989707	NaN	NaN	NaN	NaN	NaN	NaN
8.5679	-0.628343	1.13598	8.40421	-0.580991	0.996647	NaN	NaN	NaN	NaN	NaN	NaN
8.58375	-0.645357	1.13	8.41526	-0.631116	0.997406	NaN	NaN	NaN	NaN	NaN	NaN
8.60165	-0.625981	1.13694	8.42777	-0.665458	0.992013	NaN	NaN	NaN	NaN	NaN	NaN
8.61172	-0.612022	1.13731	8.44492	-0.641168	0.992263	NaN	NaN	NaN	NaN	NaN	NaN
8.62582	-0.598195	1.13663	8.453	-0.651569	0.991942	NaN	NaN	NaN	NaN	NaN	NaN
8.63295	-0.640558	1.12413	8.46348	-0.642864	0.984532	NaN	NaN	NaN	NaN	NaN	NaN
8.64333	-0.582196	1.13539	8.47376	-0.60127	0.989447	NaN	NaN	NaN	NaN	NaN	NaN
8.65822	-0.674096	1.12807	8.48747	-0.602267	0.984686	NaN	NaN	NaN	NaN	NaN	NaN
8.65978	-0.691096	1.1248	8.50173	-0.581242	0.994547	NaN	NaN	NaN	NaN	NaN	NaN
8.66463	-0.681701	1.13184	8.51402	-0.619062	0.993479	NaN	NaN	NaN	NaN	NaN	NaN
8.66961	-0.72744	1.12172	8.52322	-0.706879	0.971702	NaN	NaN	NaN	NaN	NaN	NaN
8.68602	-0.712199	1.11376	8.53873	-0.763308	0.965449	NaN	NaN	NaN	NaN	NaN	NaN
8.70272	-0.698317	1.10962	8.55635	-0.719011	0.960667	NaN	NaN	NaN	NaN	NaN	NaN
8.72267	-0.708519	1.10362	8.56092	-0.711212	0.956365	NaN	NaN	NaN	NaN	NaN	NaN
8.74426	-0.663723	1.11298	8.57686	-0.732815	0.95516	NaN	NaN	NaN	NaN	NaN	NaN
8.75056	-0.673656	1.10925	8.5919	-0.724102	0.950327	NaN	NaN	NaN	NaN	NaN	NaN
8.75836	-0.726559	1.10072	8.59782	-0.737698	0.949799	NaN	NaN	NaN	NaN	NaN	NaN
8.76878	-0.742776	1.09442	8.6081	-0.702758	0.954473	NaN	NaN	NaN	NaN	NaN	NaN
8.77837	-0.761247	1.0864	8.61841	-0.729887	0.95061	NaN	NaN	NaN	NaN	NaN	NaN
8.79345	-0.733306	1.10098	8.62479	-0.725657	0.942678	NaN	NaN	NaN	NaN	NaN	NaN
8.80824	-0.708352	1.09095	8.63964	-0.651953	0.95644	NaN	NaN	NaN	NaN	NaN	NaN
8.82603	-0.71962	1.0941	8.65617	-0.676843	0.956956	NaN	NaN	NaN	NaN	NaN	NaN
8.83681	-0.744068	1.0947	8.67301	-0.733166	0.951257	NaN	NaN	NaN	NaN	NaN	NaN
8.851	-0.727769	1.09546	8.68312	-0.73278	0.960695	NaN	NaN	NaN	NaN	NaN	NaN
8.8675	-0.75197	1.0942	8.6951	-0.752306	0.965678	NaN	NaN	NaN	NaN	NaN	NaN
8.87856	-0.718512	1.09603	8.70468	-0.677611	0.970808	NaN	NaN	NaN	NaN	NaN	NaN
8.88872	-0.731559	1.09428	8.71978	-0.701329	0.954855	NaN	NaN	NaN	NaN	NaN	NaN
8.89205	-0.763453	1.09053	8.72895	-0.683678	0.951849	NaN	NaN	NaN	NaN	NaN	NaN
8.9164	-0.711906	1.09436	8.73645	-0.678498	0.952305	NaN	NaN	NaN	NaN	NaN	NaN
8.9284	-0.733487	1.09164	8.74685	-0.660389	0.957023	NaN	NaN	NaN	NaN	NaN	NaN
8.93348	-0.779236	1.08506	8.76083	-0.679789	0.948899	NaN	NaN	NaN	NaN	NaN	NaN
8.93505	-0.706226	1.08911	8.77352	-0.622479	0.947398	NaN	NaN	NaN	NaN	NaN	NaN
8.94988	-0.718431	1.08577	8.79006	-0.630108	0.952196	NaN	NaN	NaN	NaN	NaN	NaN
8.97352	-0.634928	1.09464	8.79827	-0.681622	0.931154	NaN	NaN	NaN	NaN	NaN	NaN
8.99626	-0.649294	1.09682	8.81261	-0.641296	0.93897	NaN	NaN	NaN	NaN	NaN	NaN
9.01222	-0.661418	1.09648	8.82921	-0.619099	0.9352	NaN	NaN	NaN	NaN	NaN	NaN
9.00597	-0.658137	1.08689	8.84794	-0.635152	0.941771	NaN	NaN	NaN	NaN	NaN	NaN
9.01103	-0.694438	1.08442	8.85511	-0.655988	0.947028	NaN	NaN	NaN	NaN	NaN	NaN
9.01935	-0.663281	1.08492	8.86972	-0.662153	0.951138	NaN	NaN	NaN	NaN	NaN	NaN
9.04476	-0.670874	1.08057	8.88603	-0.70306	0.942282	NaN	NaN	NaN	NaN	NaN	NaN
9.05749	-0.725305	1.07998	8.89005	-0.608982	0.954617	NaN	NaN	NaN	NaN	NaN	NaN
9.07763	-0.752617	1.08055	8.8955	-0.619834	0.942527	NaN	NaN	NaN	NaN	NaN	NaN
9.09136	-0.721815	1.0665	8.90426	-0.560278	0.950183	NaN	NaN	NaN	NaN	NaN	NaN
9.09474	-0.698264	1.07667	8.91945	-0.612224	0.94851	NaN	NaN	NaN	NaN	NaN	NaN
9.10209	-0.735196	1.06871	8.92908	-0.673174	0.942328	NaN	NaN	NaN	NaN	NaN	NaN
9.10832	-0.732261	1.06462	8.94717	-0.676906	0.936899	NaN	NaN	NaN	NaN	NaN	NaN
9.12739	-0.726373	1.07207	8.95797	-0.730163	0.918844	NaN	NaN	NaN	NaN	NaN	NaN
9.13847	-0.749455	1.06973	8.97193	-0.802196	0.90989	NaN	NaN	NaN	NaN	NaN	NaN
9.15041	-0.69864	1.07094	8.97645	-0.741971	0.920715	NaN	NaN	NaN	NaN	NaN	NaN
9.16015	-0.722483	1.07131	8.9973	-0.677522	0.928692	NaN	NaN	NaN	NaN	NaN	NaN
9.17044	-0.703506	1.07463	9.00935	-0.702716	0.920201	NaN	NaN	NaN	NaN	NaN	NaN
9.18223	-0.726261	1.06094	9.02943	-0.694258	0.919418	NaN	NaN	NaN	NaN	NaN	NaN
9.19726	-0.765074	1.05119	9.04568	-0.712436	0.904825	NaN	NaN	NaN	NaN	NaN	NaN
9.21443	-0.791887	1.043	9.05332	-0.680461	0.919946	NaN	NaN	NaN	NaN	NaN	NaN
9.23183	-0.785281	1.05885	9.05826	-0.72484	0.910324	NaN	NaN	NaN	NaN	NaN	NaN
9.24302	-0.803403	1.04858	9.0705	-0.687737	0.912195	NaN	NaN	NaN	NaN	NaN	NaN
9.25428	-0.798013	1.05069	9.07897	-0.674606	0.917148	NaN	NaN	NaN	NaN	NaN	NaN
9.26329	-0.776061	1.05425	9.0898	-0.700671	0.915941	NaN	NaN	NaN	NaN	NaN	NaN
9.26324	-0.801711	1.04228	9.10328	-0.755038	0.904126	NaN	NaN	NaN	NaN	NaN	NaN
9.27842	-0.851035	1.03402	9.11757	-0.778815	0.903565	NaN	NaN	NaN	NaN	NaN	NaN
9.29763	-0.786414	1.02721	9.1283	-0.746018	0.91147	NaN	NaN	NaN	NaN	NaN	NaN
9.31167	-0.782542	1.03139	9.14108	-0.783566	0.906419	NaN	NaN	NaN	NaN	NaN	NaN
9.33336	-0.733895	1.04685	9.15249	-0.676653	0.923114	NaN	NaN	NaN	NaN	NaN	NaN
9.34841	-0.707966	1.04531	9.16098	-0.628932	0.929008	NaN	NaN	NaN	NaN	NaN	NaN
9.35999	-0.76552	1.03602	9.17868	-0.705472	0.901974	NaN	NaN	NaN	NaN	NaN	NaN
9.36815	-0.701911	1.036	9.18866	-0.696387	0.906919	NaN	NaN	NaN	NaN	NaN	NaN
9.36809	-0.732834	1.02683	9.20463	-0.757316	0.90464	NaN	NaN	NaN	NaN	NaN	NaN
9.37931	-0.715926	1.03385	9.20855	-0.726689	0.914495	NaN	NaN	NaN	NaN	NaN	NaN
9.39055	-0.685151	1.03567	9.21869	-0.718019	0.907856	NaN	NaN	NaN	NaN	NaN	NaN
9.40593	-0.726059	1.03763	9.2287	-0.682979	0.912578	NaN	NaN	NaN	NaN	NaN	NaN
9.41925	-0.760291	1.03555	9.24339	-0.724034	0.895684	NaN	NaN	NaN	NaN	NaN	NaN
9.43156	-0.779225	1.0275	9.25926	-0.754156	0.889652	NaN	NaN	NaN	NaN	NaN	NaN
9.43826	-0.753516	1.03075	9.27788	-0.725985	0.888922	NaN	NaN	NaN	NaN	NaN	NaN
9.45026	-0.788719	1.02834	9.28656	-0.681682	0.891003	NaN	NaN	NaN	NaN	NaN	NaN
9.47186	-0.6918	1.03732	9.29406	-0.691846	0.888182	NaN	NaN	NaN	NaN	NaN	NaN
9.48475	-0.688748	1.03607	9.3065	-0.662087	0.89258	NaN	NaN	NaN	NaN	NaN	NaN
9.50083	-0.664744	1.03678	9.31225	-0.714582	0.891033	NaN	NaN	NaN	NaN	NaN	NaN
9.51964	-0.6863	1.03615	9.32237	-0.74587	0.886483	NaN	NaN	NaN	NaN	NaN	NaN
9.53558	-0.712466	1.02598	9.33477	-0.746685	0.8904	NaN	NaN	NaN	NaN	NaN	NaN
9.53416	-0.716079	1.02727	9.36081	-0.70789	0.891038	NaN	NaN	NaN	NaN	NaN	NaN
9.53839	-0.683948	1.03618	9.35927	-0.716874	0.899705	NaN	NaN	NaN	NaN	NaN	NaN
9.54458	-0.693488	1.03513	9.3689	-0.715367	0.895868	NaN	NaN	NaN	NaN	NaN	NaN
9.55495	-0.725199	1.02141	9.37864	-0.770197	0.884759	NaN	NaN	NaN	NaN	NaN	NaN
9.56896	-0.7686	1.01093	9.39393	-0.74123	0.889474	NaN	NaN	NaN	NaN	NaN	NaN
9.58308	-0.762448	1.00936	9.41001	-0.758033	0.886491	NaN	NaN	NaN	NaN	NaN	NaN
9.59205	-0.72816	1.01182	9.42426	-0.730686	0.890142	NaN	NaN	NaN	NaN	NaN	NaN
9.60608	-0.764565	1.00761	9.43865	-0.763678	0.883034	NaN	NaN	NaN	NaN	NaN	NaN
9.62527	-0.769444	1.01005	9.4493	-0.773699	0.881887	NaN	NaN	NaN	NaN	NaN	NaN
9.6435	-0.720273	1.01448	9.46191	-0.731062	0.891172	NaN	NaN	NaN	NaN	NaN	NaN
9.64349	-0.745469	1.00554	9.47858	-0.744013	0.891999	NaN	NaN	NaN	NaN	NaN	NaN
9.65427	-0.704828	1.00769	9.49362	-0.715187	0.891623	NaN	NaN	NaN	NaN	NaN	NaN
9.66097	-0.65587	1.01333	9.50464	-0.711626	0.892519	NaN	NaN	NaN	NaN	NaN	NaN
9.68856	-0.688014	1.00351	9.51429	-0.723703	0.890326	NaN	NaN	NaN	NaN	NaN	NaN
9.70116	-0.727504	0.987161	9.51972	-0.7608	0.877734	NaN	NaN	NaN	NaN	NaN	NaN
9.71217	-0.773486	0.995117	9.52855	-0.805125	0.866728	NaN	NaN	NaN	NaN	NaN	NaN
9.72814	-0.77532	0.994262	9.53928	-0.788864	0.877739	NaN	NaN	NaN	NaN	NaN	NaN
9.73881	-0.823723	0.972452	9.55013	-0.761758	0.866889	NaN	NaN	NaN	NaN	NaN	NaN
9.75718	-0.824663	0.969577	9.56211	-0.727456	0.872887	NaN	NaN	NaN	NaN	NaN	NaN
9.76462	-0.827984	0.963791	9.57902	-0.714701	0.872784	NaN	NaN	NaN	NaN	NaN	NaN
9.78053	-0.810921	0.973494	9.58291	-0.747816	0.863312	NaN	NaN	NaN	NaN	NaN	NaN
9.79248	-0.833552	0.967248	9.59366	-0.681731	0.880434	NaN	NaN	NaN	NaN	NaN	NaN
9.80285	-0.795386	0.972844	9.61341	-0.773202	0.869616	NaN	NaN	NaN	NaN	NaN	NaN
9.81312	-0.796482	0.973746	9.62558	-0.808875	0.870935	NaN	NaN	NaN	NaN	NaN	NaN
9.82474	-0.792713	0.974238	9.64044	-0.795774	0.867674	NaN	NaN	NaN	NaN	NaN	NaN
9.83599	-0.862047	0.957934	9.65014	-0.720236	0.871586	NaN	NaN	NaN	NaN	NaN	NaN
9.84139	-0.846913	0.947546	9.65989	-0.72005	0.866708	NaN	NaN	NaN	NaN	NaN	NaN
9.84573	-0.840044	0.944275	9.66539	-0.70863	0.869766	NaN	NaN	NaN	NaN	NaN	NaN
9.86158	-0.814118	0.949312	9.67508	-0.748774	0.870046	NaN	NaN	NaN	NaN	NaN	NaN
9.87373	-0.805931	0.951715	9.68126	-0.719116	0.871116	NaN	NaN	NaN	NaN	NaN	NaN
9.88651	-0.778243	0.95534	9.68892	-0.73208	0.867229	NaN	NaN	NaN	NaN	NaN	NaN
9.90216	-0.80793	0.951622	9.71928	-0.745385	0.85976	NaN	NaN	NaN	NaN	NaN	NaN
9.92064	-0.813814	0.94908	9.73146	-0.796747	0.849597	NaN	NaN	NaN	NaN	NaN	NaN
9.93544	-0.765621	0.952235	9.74427	-0.764023	0.852233	NaN	NaN	NaN	NaN	NaN	NaN
9.95583	-0.832795	0.952889	9.75475	-0.781621	0.846586	NaN	NaN	NaN	NaN	NaN	NaN
9.95317	-0.920718	0.940551	9.76959	-0.797387	0.850668	NaN	NaN	NaN	NaN	NaN	NaN
9.96241	-0.913066	0.945926	9.78563	-0.777987	0.850776	NaN	NaN	NaN	NaN	NaN	NaN
9.96503	-0.817199	0.95072	9.79393	-0.749602	0.850533	NaN	NaN	NaN	NaN	NaN	NaN
9.98584	-0.838977	0.937739	9.81319	-0.744092	0.850082	NaN	NaN	NaN	NaN	NaN	NaN
10.0075	-0.842809	0.931694	9.81606	-0.709286	0.849847	NaN	NaN	NaN	NaN	NaN	NaN
10.0224	-0.846078	0.929147	9.82502	-0.733842	0.845376	NaN	NaN	NaN	NaN	NaN	NaN
10.0355	-0.863522	0.935338	9.84472	-0.721525	0.849956	NaN	NaN	NaN	NaN	NaN	NaN
10.0477	-0.854721	0.932649	9.85245	-0.743683	0.841041	NaN	NaN	NaN	NaN	NaN	NaN
10.0651	-0.840522	0.935171	9.86443	-0.683276	0.852308	NaN	NaN	NaN	NaN	NaN	NaN
10.0753	-0.875961	0.929546	9.88035	-0.714257	0.85094	NaN	NaN	NaN	NaN	NaN	NaN
10.086	-0.797409	0.929375	9.89069	-0.710764	0.840716	NaN	NaN	NaN	NaN	NaN	NaN
10.0914	-0.743184	0.927784	9.89964	-0.683406	0.841372	NaN	NaN	NaN	NaN	NaN	NaN
10.0948	-0.809575	0.926802	9.90714	-0.659379	0.836582	NaN	NaN	NaN	NaN	NaN	NaN
10.1112	-0.794008	0.92472	9.92069	-0.663131	0.829957	NaN	NaN	NaN	NaN	NaN	NaN
10.1251	-0.794057	0.929768	9.93346	-0.701252	0.832836	NaN	NaN	NaN	NaN	NaN	NaN
10.1423	-0.773269	0.934722	9.95338	-0.699579	0.831552	NaN	NaN	NaN	NaN	NaN	NaN
10.1627	-0.780602	0.933287	9.96763	-0.690203	0.832989	NaN	NaN	NaN	NaN	NaN	NaN
10.1732	-0.764746	0.933114	9.97547	-0.688983	0.830615	NaN	NaN	NaN	NaN	NaN	NaN
10.1845	-0.855052	0.908497	9.98598	-0.792335	0.803957	NaN	NaN	NaN	NaN	NaN	NaN
10.1968	-0.858044	0.914505	9.98926	-0.794672	0.802809	NaN	NaN	NaN	NaN	NaN	NaN
10.2115	-0.882137	0.907948	10.0058	-0.747954	0.811611	NaN	NaN	NaN	NaN	NaN	NaN
10.2101	-0.794854	0.915262	10.017	-0.756687	0.811277	NaN	NaN	NaN	NaN	NaN	NaN
10.218	-0.860668	0.9067	10.0265	-0.768805	0.804531	NaN	NaN	NaN	NaN	NaN	NaN
10.2308	-0.834847	0.905118	10.0434	-0.798588	0.798581	NaN	NaN	NaN	NaN	NaN	NaN
10.235	-0.787381	0.911874	10.053	-0.715464	0.809421	NaN	NaN	NaN	NaN	NaN	NaN
10.2536	-0.785573	0.913736	10.0599	-0.694641	0.805703	NaN	NaN	NaN	NaN	NaN	NaN
10.2674	-0.749086	0.913841	10.0748	-0.668065	0.803402	NaN	NaN	NaN	NaN	NaN	NaN
10.2828	-0.792888	0.902788	10.0893	-0.706586	0.812742	NaN	NaN	NaN	NaN	NaN	NaN
10.3021	-0.768883	0.912491	10.1032	-0.68429	0.811807	NaN	NaN	NaN	NaN	NaN	NaN
10.3097	-0.821132	0.906785	10.1199	-0.763843	0.787339	NaN	NaN	NaN	NaN	NaN	NaN
10.3145	-0.788265	0.90866	10.1296	-0.75039	0.784152	NaN	NaN	NaN	NaN	NaN	NaN
10.3204	-0.764688	0.908612	10.1348	-0.732373	0.787251	NaN	NaN	NaN	NaN	NaN	NaN
10.3417	-0.808099	0.899884	10.1448	-0.760212	0.785731	NaN	NaN	NaN	NaN	NaN	NaN
10.3627	-0.830613	0.895588	10.1576	-0.757893	0.787851	NaN	NaN	NaN	NaN	NaN	NaN
10.3828	-0.827789	0.893454	10.1846	-0.785251	0.779752	NaN	NaN	NaN	NaN	NaN	NaN
10.386	-0.79317	0.892498	10.2033	-0.755552	0.787827	NaN	NaN	NaN	NaN	NaN	NaN
10.3975	-0.825968	0.891221	10.2134	-0.738132	0.791012	NaN	NaN	NaN	NaN	NaN	NaN
10.4034	-0.742962	0.887107	10.2202	-0.743909	0.780414	NaN	NaN	NaN	NaN	NaN	NaN
10.4129	-0.791178	0.882018	10.224	-0.705745	0.788653	NaN	NaN	NaN	NaN	NaN	NaN
10.4213	-0.850828	0.865124	10.2343	-0.67171	0.786914	NaN	NaN	NaN	NaN	NaN	NaN
10.4366	-0.815267	0.875115	10.2468	-0.615604	0.795173	NaN	NaN	NaN	NaN	NaN	NaN
10.4472	-0.832415	0.863021	10.258	-0.703754	0.772004	NaN	NaN	NaN	NaN	NaN	NaN
10.4659	-0.793076	0.870782	10.2692	-0.745037	0.764973	NaN	NaN	NaN	NaN	NaN	NaN
10.4801	-0.800769	0.872757	10.2803	-0.777338	0.755967	NaN	NaN	NaN	NaN	NaN	NaN
10.4897	-0.810113	0.872244	10.2967	-0.755077	0.749336	NaN	NaN	NaN	NaN	NaN	NaN
10.5001	-0.821056	0.861376	10.3147	-0.759642	0.74315	NaN	NaN	NaN	NaN	NaN	NaN
10.5042	-0.822417	0.866901	10.3372	-0.747922	0.745327	NaN	NaN	NaN	NaN	NaN	NaN
10.5148	-0.819683	0.869457	10.348	-0.727946	0.760957	NaN	NaN	NaN	NaN	NaN	NaN
10.5239	-0.775487	0.872436	10.3576	-0.729856	0.769981	NaN	NaN	NaN	NaN	NaN	NaN
10.5343	-0.763061	0.867463	10.3606	-0.725799	0.75334	NaN	NaN	NaN	NaN	NaN	NaN
10.5421	-0.69185	0.86835	10.3686	-0.677822	0.752225	NaN	NaN	NaN	NaN	NaN	NaN
10.569	-0.750583	0.85984	10.3721	-0.64918	0.745991	NaN	NaN	NaN	NaN	NaN	NaN
10.584	-0.810726	0.851837	10.4014	-0.639653	0.751283	NaN	NaN	NaN	NaN	NaN	NaN
10.5944	-0.806295	0.853596	10.4229	-0.644002	0.754158	NaN	NaN	NaN	NaN	NaN	NaN
10.5998	-0.747612	0.854369	10.4327	-0.649797	0.752846	NaN	NaN	NaN	NaN	NaN	NaN
10.5974	-0.73375	0.847499	10.439	-0.671566	0.739699	NaN	NaN	NaN	NaN	NaN	NaN
10.6184	-0.756853	0.842268	10.4517	-0.718361	0.728123	NaN	NaN	NaN	NaN	NaN	NaN
10.6433	-0.757027	0.843355	10.4597	-0.7495	0.717483	NaN	NaN	NaN	NaN	NaN	NaN
10.6591	-0.726759	0.856197	10.4676	-0.807758	0.703607	NaN	NaN	NaN	NaN	NaN	NaN
10.6675	-0.785146	0.837608	10.4714	-0.785842	0.705864	NaN	NaN	NaN	NaN	NaN	NaN
10.6787	-0.798144	0.828111	10.502	-0.723327	0.715294	NaN	NaN	NaN	NaN	NaN	NaN
10.6942	-0.765884	0.829268	10.5248	-0.755123	0.713226	NaN	NaN	NaN	NaN	NaN	NaN
10.7014	-0.782202	0.825292	10.5397	-0.742951	0.709337	NaN	NaN	NaN	NaN	NaN	NaN
10.7121	-0.771032	0.832827	10.5466	-0.730036	0.709604	NaN	NaN	NaN	NaN	NaN	NaN
10.7248	-0.778295	0.833587	10.5513	-0.682995	0.711739	NaN	NaN	NaN	NaN	NaN	NaN
10.7405	-0.773174	0.822124	10.562	-0.671353	0.712418	NaN	NaN	NaN	NaN	NaN	NaN
10.7511	-0.714071	0.832743	10.5767	-0.700127	0.707659	NaN	NaN	NaN	NaN	NaN	NaN
10.7619	-0.767415	0.81942	10.585	-0.70207	0.711316	NaN	NaN	NaN	NaN	NaN	NaN
10.7714	-0.77468	0.816407	10.5958	-0.743847	0.693307	NaN	NaN	NaN	NaN	NaN	NaN
10.7813	-0.778919	0.806023	10.6074	-0.754066	0.691875	NaN	NaN	NaN	NaN	NaN	NaN
10.7887	-0.711658	0.819734	10.614	-0.787698	0.681446	NaN	NaN	NaN	NaN	NaN	NaN
10.8059	-0.69258	0.818214	10.6236	-0.810274	0.679794	NaN	NaN	NaN	NaN	NaN	NaN
10.8241	-0.70121	0.816183	10.6276	-0.791385	0.677608	NaN	NaN	NaN	NaN	NaN	NaN
10.833	-0.697151	0.814906	10.6468	-0.827391	0.672473	NaN	NaN	NaN	NaN	NaN	NaN
10.8411	-0.720973	0.808822	10.6569	-0.709536	0.6799	NaN	NaN	NaN	NaN	NaN	NaN
10.843	-0.697506	0.806669	10.6605	-0.648504	0.690515	NaN	NaN	NaN	NaN	NaN	NaN
10.8497	-0.684725	0.801412	10.678	-0.729314	0.669864	NaN	NaN	NaN	NaN	NaN	NaN
10.873	-0.720428	0.794091	10.6889	-0.762248	0.66712	NaN	NaN	NaN	NaN	NaN	NaN
10.8858	-0.675487	0.793392	10.7063	-0.772522	0.663968	NaN	NaN	NaN	NaN	NaN	NaN
10.9054	-0.684112	0.7947	10.7245	-0.759519	0.670001	NaN	NaN	NaN	NaN	NaN	NaN
10.9179	-0.726453	0.783522	10.7347	-0.795075	0.658369	NaN	NaN	NaN	NaN	NaN	NaN
10.9246	-0.721137	0.784796	10.7477	-0.799919	0.655697	NaN	NaN	NaN	NaN	NaN	NaN
10.93	-0.700783	0.787949	10.7543	-0.77416	0.652192	NaN	NaN	NaN	NaN	NaN	NaN
10.9494	-0.698368	0.78814	10.7631	-0.76675	0.641685	NaN	NaN	NaN	NaN	NaN	NaN
10.9606	-0.762967	0.77623	10.7666	-0.714189	0.657852	NaN	NaN	NaN	NaN	NaN	NaN
10.968	-0.801304	0.759047	10.7941	-0.772795	0.636994	NaN	NaN	NaN	NaN	NaN	NaN
10.9771	-0.810043	0.746579	10.8035	-0.826527	0.626772	NaN	NaN	NaN	NaN	NaN	NaN
10.9899	-0.810519	0.748882	10.8117	-0.812199	0.626942	NaN	NaN	NaN	NaN	NaN	NaN
10.998	-0.781846	0.758509	10.8207	-0.80045	0.631147	NaN	NaN	NaN	NaN	NaN	NaN
11.0239	-0.841449	0.740575	10.836	-0.781233	0.628435	NaN	NaN	NaN	NaN	NaN	NaN
11.0472	-0.835389	0.750531	10.8431	-0.784755	0.621822	NaN	NaN	NaN	NaN	NaN	NaN
11.0526	-0.839064	0.740103	10.8527	-0.70544	0.63618	NaN	NaN	NaN	NaN	NaN	NaN
11.0591	-0.828712	0.74491	10.8659	-0.678513	0.635447	NaN	NaN	NaN	NaN	NaN	NaN
11.0647	-0.83017	0.746437	10.8849	-0.663822	0.629515	NaN	NaN	NaN	NaN	NaN	NaN
11.0767	-0.734473	0.73761	10.9012	-0.704895	0.629606	NaN	NaN	NaN	NaN	NaN	NaN
11.0942	-0.728627	0.733685	10.9166	-0.767867	0.6188	NaN	NaN	NaN	NaN	NaN	NaN
11.1026	-0.743083	0.730127	10.9312	-0.750629	0.625598	NaN	NaN	NaN	NaN	NaN	NaN
11.1134	-0.749857	0.731332	10.9377	-0.720858	0.626934	NaN	NaN	NaN	NaN	NaN	NaN
11.1233	-0.669224	0.734051	10.9526	-0.777167	0.617847	NaN	NaN	NaN	NaN	NaN	NaN
11.143	-0.675667	0.737465	10.9488	-0.674824	0.618905	NaN	NaN	NaN	NaN	NaN	NaN
11.1569	-0.660031	0.735552	10.9643	-0.701872	0.603335	NaN	NaN	NaN	NaN	NaN	NaN
11.1601	-0.660193	0.735417	10.968	-0.635187	0.609989	NaN	NaN	NaN	NaN	NaN	NaN
11.168	-0.726114	0.717884	10.9839	-0.667017	0.600568	NaN	NaN	NaN	NaN	NaN	NaN
11.1708	-0.731182	0.702861	10.9949	-0.651414	0.604731	NaN	NaN	NaN	NaN	NaN	NaN
11.1908	-0.731231	0.714004	11.0054	-0.685498	0.595739	NaN	NaN	NaN	NaN	NaN	NaN
11.208	-0.734507	0.712553	11.0233	-0.760902	0.587804	NaN	NaN	NaN	NaN	NaN	NaN
11.2175	-0.71684	0.714159	11.0378	-0.817344	0.576848	NaN	NaN	NaN	NaN	NaN	NaN
11.2283	-0.738262	0.711954	11.045	-0.824919	0.58089	NaN	NaN	NaN	NaN	NaN	NaN
11.229	-0.713319	0.709268	11.0543	-0.74285	0.585792	NaN	NaN	NaN	NaN	NaN	NaN
11.2444	-0.68666	0.710326	11.0666	-0.728942	0.586536	NaN	NaN	NaN	NaN	NaN	NaN
11.2628	-0.711138	0.694866	11.0929	-0.757935	0.581728	NaN	NaN	NaN	NaN	NaN	NaN
11.2733	-0.680213	0.707671	11.1065	-0.698101	0.59494	NaN	NaN	NaN	NaN	NaN	NaN
11.2796	-0.606185	0.71662	11.1099	-0.702013	0.582717	NaN	NaN	NaN	NaN	NaN	NaN
11.2987	-0.699507	0.693081	11.116	-0.680221	0.587791	NaN	NaN	NaN	NaN	NaN	NaN
11.3075	-0.706517	0.691314	11.1292	-0.733623	0.582054	NaN	NaN	NaN	NaN	NaN	NaN
11.3206	-0.677027	0.690929	11.1409	-0.636464	0.592928	NaN	NaN	NaN	NaN	NaN	NaN
11.3328	-0.624469	0.696351	11.1595	-0.621174	0.589953	NaN	NaN	NaN	NaN	NaN	NaN
11.3498	-0.733424	0.675403	11.18	-0.727171	0.558888	NaN	NaN	NaN	NaN	NaN	NaN
11.3601	-0.673521	0.684082	11.1763	-0.716392	0.562869	NaN	NaN	NaN	NaN	NaN	NaN
11.3631	-0.614127	0.694307	11.1795	-0.708991	0.565379	NaN	NaN	NaN	NaN	NaN	NaN
11.3687	-0.60386	0.695661	11.1872	-0.720202	0.562832	NaN	NaN	NaN	NaN	NaN	NaN
11.3913	-0.662503	0.678639	11.197	-0.69552	0.571834	NaN	NaN	NaN	NaN	NaN	NaN
11.4142	-0.704255	0.672861	11.2268	-0.717388	0.548386	NaN	NaN	NaN	NaN	NaN	NaN
11.4244	-0.710534	0.672353	11.2426	-0.710273	0.548039	NaN	NaN	NaN	NaN	NaN	NaN
11.433	-0.700733	0.675192	11.2568	-0.693229	0.552016	NaN	NaN	NaN	NaN	NaN	NaN
11.4482	-0.678306	0.66458	11.267	-0.66586	0.552168	NaN	NaN	NaN	NaN	NaN	NaN
11.4602	-0.625571	0.674482	11.2791	-0.707524	0.539071	NaN	NaN	NaN	NaN	NaN	NaN
11.4667	-0.607103	0.676279	11.2865	-0.721303	0.534935	NaN	NaN	NaN	NaN	NaN	NaN
11.4795	-0.65553	0.656676	11.3021	-0.796654	0.517394	NaN	NaN	NaN	NaN	NaN	NaN
11.4878	-0.677655	0.645394	11.317	-0.760321	0.526633	NaN	NaN	NaN	NaN	NaN	NaN
11.4948	-0.642004	0.645627	11.3243	-0.70421	0.524086	NaN	NaN	NaN	NaN	NaN	NaN
11.5127	-0.617913	0.653557	11.3399	-0.66006	0.530678	NaN	NaN	NaN	NaN	NaN	NaN
11.5237	-0.654603	0.648734	11.3592	-0.64456	0.532179	NaN	NaN	NaN	NaN	NaN	NaN
11.5352	-0.608682	0.654337	11.3622	-0.646939	0.52961	NaN	NaN	NaN	NaN	NaN	NaN
11.5428	-0.60298	0.647412	11.3694	-0.661134	0.521743	NaN	NaN	NaN	NaN	NaN	NaN
11.5517	-0.597483	0.655356	11.3703	-0.587447	0.528726	NaN	NaN	NaN	NaN	NaN	NaN
11.5656	-0.683957	0.62865	11.3808	-0.629756	0.524776	NaN	NaN	NaN	NaN	NaN	NaN
11.5859	-0.706993	0.619249	11.3907	-0.586623	0.533888	NaN	NaN	NaN	NaN	NaN	NaN
11.6036	-0.74628	0.612998	11.4046	-0.626213	0.523396	NaN	NaN	NaN	NaN	NaN	NaN
11.6256	-0.756885	0.613524	11.4151	-0.560734	0.532584	NaN	NaN	NaN	NaN	NaN	NaN
11.6306	-0.714504	0.61254	11.4359	-0.608227	0.524772	NaN	NaN	NaN	NaN	NaN	NaN
11.628	-0.664892	0.621779	11.4583	-0.709005	0.499739	NaN	NaN	NaN	NaN	NaN	NaN
11.6466	-0.675345	0.606122	11.463	-0.66551	0.504005	NaN	NaN	NaN	NaN	NaN	NaN
11.6571	-0.665604	0.610849	11.4706	-0.705417	0.500227	NaN	NaN	NaN	NaN	NaN	NaN
11.6575	-0.630334	0.607856	11.4889	-0.699168	0.491622	NaN	NaN	NaN	NaN	NaN	NaN
11.6666	-0.57391	0.615704	11.5019	-0.701232	0.490161	NaN	NaN	NaN	NaN	NaN	NaN
11.6845	-0.582456	0.614467	11.5212	-0.736697	0.487977	NaN	NaN	NaN	NaN	NaN	NaN
11.6974	-0.622568	0.605366	11.5427	-0.740475	0.488404	NaN	NaN	NaN	NaN	NaN	NaN
11.7067	-0.591235	0.61621	11.549	-0.677441	0.492919	NaN	NaN	NaN	NaN	NaN	NaN
11.7218	-0.597653	0.613843	11.5606	-0.666697	0.484649	NaN	NaN	NaN	NaN	NaN	NaN
11.7295	-0.60383	0.601695	11.5578	-0.647194	0.486012	NaN	NaN	NaN	NaN	NaN	NaN
11.7377	-0.615309	0.595641	11.5622	-0.634799	0.484925	NaN	NaN	NaN	NaN	NaN	NaN
11.7512	-0.570239	0.597708	11.5636	-0.544538	0.495167	NaN	NaN	NaN	NaN	NaN	NaN
11.7693	-0.575071	0.596091	11.5872	-0.623971	0.474725	NaN	NaN	NaN	NaN	NaN	NaN
11.7805	-0.59553	0.590488	11.5973	-0.642044	0.472599	NaN	NaN	NaN	NaN	NaN	NaN
11.7964	-0.603661	0.586478	11.6048	-0.632797	0.464135	NaN	NaN	NaN	NaN	NaN	NaN
11.8071	-0.619022	0.58326	11.6202	-0.642999	0.470841	NaN	NaN	NaN	NaN	NaN	NaN
11.8161	-0.614678	0.584307	11.6357	-0.621235	0.470439	NaN	NaN	NaN	NaN	NaN	NaN
11.8194	-0.551752	0.596188	11.6603	-0.632048	0.473184	NaN	NaN	NaN	NaN	NaN	NaN
11.8186	-0.563643	0.591915	11.6675	-0.606526	0.471143	NaN	NaN	NaN	NaN	NaN	NaN
11.8406	-0.586221	0.584655	11.6758	-0.59742	0.471607	NaN	NaN	NaN	NaN	NaN	NaN
11.8507	-0.593779	0.5937	11.6877	-0.615593	0.459773	NaN	NaN	NaN	NaN	NaN	NaN
11.8589	-0.505825	0.596887	11.6959	-0.590656	0.458891	NaN	NaN	NaN	NaN	NaN	NaN
11.8772	-0.506377	0.589453	11.7113	-0.633829	0.450909	NaN	NaN	NaN	NaN	NaN	NaN
11.8956	-0.495925	0.593923	11.7106	-0.57466	0.451487	NaN	NaN	NaN	NaN	NaN	NaN
11.9128	-0.498795	0.600076	11.7239	-0.541481	0.45749	NaN	NaN	NaN	NaN	NaN	NaN
11.9236	-0.526495	0.58925	11.7347	-0.55671	0.447718	NaN	NaN	NaN	NaN	NaN	NaN
11.9272	-0.470982	0.600912	11.7458	-0.561822	0.451874	NaN	NaN	NaN	NaN	NaN	NaN
11.9289	-0.487302	0.590891	11.7559	-0.553272	0.447722	NaN	NaN	NaN	NaN	NaN	NaN
11.9375	-0.533255	0.575508	11.7655	-0.54177	0.457611	NaN	NaN	NaN	NaN	NaN	NaN
11.9513	-0.562965	0.563381	11.7795	-0.543121	0.44607	NaN	NaN	NaN	NaN	NaN	NaN
11.9662	-0.576885	0.550057	11.805	-0.535186	0.452233	NaN	NaN	NaN	NaN	NaN	NaN
11.9737	-0.532859	0.557617	11.8216	-0.579739	0.443676	NaN	NaN	NaN	NaN	NaN	NaN
11.9902	-0.517831	0.567764	11.8348	-0.577896	0.443363	NaN	NaN	NaN	NaN	NaN	NaN
12.0085	-0.492115	0.577695	11.839	-0.574989	0.446648	NaN	NaN	NaN	NaN	NaN	NaN
12.0255	-0.509507	0.570542	11.8468	-0.540751	0.45107	NaN	NaN	NaN	NaN	NaN	NaN
12.0412	-0.48689	0.582511	11.8598	-0.551606	0.453343	NaN	NaN	NaN	NaN	NaN	NaN
12.0586	-0.453369	0.582046	11.868	-0.58826	0.433601	NaN	NaN	NaN	NaN	NaN	NaN
12.0698	-0.52556	0.568886	11.8825	-0.630287	0.422096	NaN	NaN	NaN	NaN	NaN	NaN
12.0724	-0.520766	0.560922	11.8896	-0.586227	0.423807	NaN	NaN	NaN	NaN	NaN	NaN
12.0805	-0.552598	0.550582	11.8993	-0.535725	0.434438	NaN	NaN	NaN	NaN	NaN	NaN
12.0839	-0.521956	0.559299	11.9078	-0.536905	0.429363	NaN	NaN	NaN	NaN	NaN	NaN
12.0901	-0.549159	0.549283	11.9217	-0.527431	0.436484	NaN	NaN	NaN	NaN	NaN	NaN
12.1015	-0.57778	0.5431	11.9417	-0.571571	0.42691	NaN	NaN	NaN	NaN	NaN	NaN
12.1227	-0.594933	0.541093	11.9423	-0.487312	0.435182	NaN	NaN	NaN	NaN	NaN	NaN
12.1374	-0.640947	0.528551	11.9645	-0.465095	0.435292	NaN	NaN	NaN	NaN	NaN	NaN
12.1544	-0.57988	0.547909	11.9808	-0.440378	0.438255	NaN	NaN	NaN	NaN	NaN	NaN
12.1511	-0.54025	0.54791	11.9856	-0.453024	0.435652	NaN	NaN	NaN	NaN	NaN	NaN
12.1573	-0.524805	0.557666	11.9948	-0.463698	0.430091	NaN	NaN	NaN	NaN	NaN	NaN
12.1666	-0.500256	0.557409	12.0051	-0.433908	0.441354	NaN	NaN	NaN	NaN	NaN	NaN
12.1831	-0.479277	0.550781	12.0164	-0.473789	0.426226	NaN	NaN	NaN	NaN	NaN	NaN
12.1937	-0.420692	0.566607	12.0268	-0.458642	0.434281	NaN	NaN	NaN	NaN	NaN	NaN
12.2054	-0.441986	0.56567	12.0431	-0.492044	0.430241	NaN	NaN	NaN	NaN	NaN	NaN
12.2262	-0.452553	0.562506	12.055	-0.464466	0.429496	NaN	NaN	NaN	NaN	NaN	NaN
12.2451	-0.502694	0.551397	12.061	-0.507949	0.420521	NaN	NaN	NaN	NaN	NaN	NaN
12.2512	-0.424301	0.560338	12.0722	-0.517017	0.409111	NaN	NaN	NaN	NaN	NaN	NaN
12.2442	-0.457079	0.553403	12.0826	-0.51243	0.41998	NaN	NaN	NaN	NaN	NaN	NaN
12.2446	-0.48127	0.543798	12.0916	-0.495196	0.411803	NaN	NaN	NaN	NaN	NaN	NaN
12.2748	-0.538843	0.531843	12.1034	-0.493846	0.419403	NaN	NaN	NaN	NaN	NaN	NaN
12.2953	-0.557493	0.530438	12.1257	-0.50709	0.416593	NaN	NaN	NaN	NaN	NaN	NaN
12.3095	-0.521085	0.540128	12.1342	-0.506152	0.416799	NaN	NaN	NaN	NaN	NaN	NaN
12.3207	-0.539893	0.537694	12.1445	-0.514249	0.414059	NaN	NaN	NaN	NaN	NaN	NaN
12.3336	-0.509528	0.541804	12.1543	-0.514298	0.416197	NaN	NaN	NaN	NaN	NaN	NaN
12.3483	-0.528467	0.532103	12.1654	-0.532321	0.408057	NaN	NaN	NaN	NaN	NaN	NaN
12.3551	-0.529774	0.531858	12.1738	-0.498596	0.41684	NaN	NaN	NaN	NaN	NaN	NaN
12.3704	-0.516792	0.533612	12.1823	-0.477464	0.410354	NaN	NaN	NaN	NaN	NaN	NaN
12.3811	-0.519783	0.53947	12.1943	-0.42849	0.418346	NaN	NaN	NaN	NaN	NaN	NaN
12.3884	-0.505668	0.540198	12.196	-0.407689	0.424964	NaN	NaN	NaN	NaN	NaN	NaN
12.3964	-0.503418	0.541556	12.2086	-0.422234	0.415716	NaN	NaN	NaN	NaN	NaN	NaN
12.4069	-0.524926	0.533776	12.2241	-0.41782	0.423252	NaN	NaN	NaN	NaN	NaN	NaN
12.4129	-0.50066	0.530578	12.2333	-0.407421	0.417658	NaN	NaN	NaN	NaN	NaN	NaN
12.4111	-0.440758	0.534892	12.2471	-0.446585	0.406174	NaN	NaN	NaN	NaN	NaN	NaN
12.4304	-0.448238	0.538081	12.2649	-0.452482	0.39861	NaN	NaN	NaN	NaN	NaN	NaN
12.441	-0.46082	0.542191	12.2791	-0.47044	0.394762	NaN	NaN	NaN	NaN	NaN	NaN
12.4574	-0.448209	0.540637	12.2887	-0.444384	0.408491	NaN	NaN	NaN	NaN	NaN	NaN
12.4795	-0.472329	0.532159	12.2936	-0.474182	0.413368	NaN	NaN	NaN	NaN	NaN	NaN
12.4979	-0.438677	0.545153	12.3009	-0.474946	0.42033	NaN	NaN	NaN	NaN	NaN	NaN
12.5028	-0.470335	0.545325	12.3137	-0.499013	0.412561	NaN	NaN	NaN	NaN	NaN	NaN
12.5114	-0.512929	0.534732	12.3341	-0.442547	0.419406	NaN	NaN	NaN	NaN	NaN	NaN
12.5115	-0.513794	0.532918	12.3365	-0.401811	0.423193	NaN	NaN	NaN	NaN	NaN	NaN
12.5254	-0.507265	0.535572	12.3577	-0.436907	0.413593	NaN	NaN	NaN	NaN	NaN	NaN
12.5482	-0.521224	0.536363	12.3725	-0.418835	0.419904	NaN	NaN	NaN	NaN	NaN	NaN
12.555	-0.520413	0.539486	12.3836	-0.430745	0.415911	NaN	NaN	NaN	NaN	NaN	NaN
12.5603	-0.50226	0.533213	12.3934	-0.404644	0.421978	NaN	NaN	NaN	NaN	NaN	NaN
12.5631	-0.469791	0.540441	12.4038	-0.416272	0.415629	NaN	NaN	NaN	NaN	NaN	NaN
12.5795	-0.486712	0.536092	12.4046	-0.40701	0.422353	NaN	NaN	NaN	NaN	NaN	NaN
12.5965	-0.506343	0.542411	12.4212	-0.420187	0.416963	NaN	NaN	NaN	NaN	NaN	NaN
12.6109	-0.504186	0.541923	12.434	-0.404183	0.421156	NaN	NaN	NaN	NaN	NaN	NaN
12.6291	-0.53599	0.531612	12.4469	-0.385612	0.423773	NaN	NaN	NaN	NaN	NaN	NaN
12.6404	-0.492558	0.54294	12.4561	-0.423371	0.420525	NaN	NaN	NaN	NaN	NaN	NaN
12.6477	-0.493156	0.533167	12.4654	-0.41431	0.414712	NaN	NaN	NaN	NaN	NaN	NaN
12.6533	-0.5196	0.52746	12.4754	-0.412004	0.420891	NaN	NaN	NaN	NaN	NaN	NaN
12.664	-0.533303	0.526781	12.4846	-0.407608	0.41506	NaN	NaN	NaN	NaN	NaN	NaN
12.688	-0.588731	0.51364	12.495	-0.398945	0.423627	NaN	NaN	NaN	NaN	NaN	NaN
12.6894	-0.489745	0.531689	12.5033	-0.399841	0.416941	NaN	NaN	NaN	NaN	NaN	NaN
12.7001	-0.517165	0.53345	12.5163	-0.412078	0.422308	NaN	NaN	NaN	NaN	NaN	NaN
12.7177	-0.509758	0.529367	12.5273	-0.4389	0.4029	NaN	NaN	NaN	NaN	NaN	NaN
12.7274	-0.495441	0.541232	12.5419	-0.467162	0.39905	NaN	NaN	NaN	NaN	NaN	NaN
12.7335	-0.492146	0.535849	12.5557	-0.486726	0.394737	NaN	NaN	NaN	NaN	NaN	NaN
12.7426	-0.432891	0.534955	12.5615	-0.441709	0.410518	NaN	NaN	NaN	NaN	NaN	NaN
12.7513	-0.382525	0.543951	12.5741	-0.400824	0.41626	NaN	NaN	NaN	NaN	NaN	NaN
12.7598	-0.460799	0.524528	12.584	-0.379049	0.425916	NaN	NaN	NaN	NaN	NaN	NaN
12.7666	-0.485577	0.519898	12.6041	-0.428218	0.409842	NaN	NaN	NaN	NaN	NaN	NaN
12.7883	-0.461581	0.523614	12.6186	-0.401084	0.419081	NaN	NaN	NaN	NaN	NaN	NaN
12.8098	-0.502116	0.519437	12.6253	-0.380703	0.422242	NaN	NaN	NaN	NaN	NaN	NaN
12.8314	-0.476344	0.526139	12.6373	-0.383568	0.423905	NaN	NaN	NaN	NaN	NaN	NaN
12.8448	-0.477868	0.523915	12.6454	-0.39355	0.415955	NaN	NaN	NaN	NaN	NaN	NaN
12.8522	-0.463517	0.525107	12.6526	-0.385236	0.42458	NaN	NaN	NaN	NaN	NaN	NaN
12.8617	-0.470552	0.52026	12.6646	-0.425383	0.415371	NaN	NaN	NaN	NaN	NaN	NaN
12.8755	-0.505272	0.513501	12.6701	-0.367424	0.422864	NaN	NaN	NaN	NaN	NaN	NaN
12.8772	-0.468526	0.525046	12.6904	-0.361962	0.417694	NaN	NaN	NaN	NaN	NaN	NaN
12.8838	-0.467722	0.513728	12.7031	-0.307747	0.425821	NaN	NaN	NaN	NaN	NaN	NaN
12.9016	-0.494074	0.51716	12.7187	-0.322574	0.421656	NaN	NaN	NaN	NaN	NaN	NaN
12.9064	-0.46695	0.517781	12.7181	-0.311287	0.423579	NaN	NaN	NaN	NaN	NaN	NaN
12.9084	-0.414699	0.52556	12.7201	-0.298998	0.422416	NaN	NaN	NaN	NaN	NaN	NaN
12.9164	-0.338048	0.529062	12.7238	-0.299109	0.426753	NaN	NaN	NaN	NaN	NaN	NaN
12.9359	-0.346086	0.515318	12.7442	-0.317001	0.417983	NaN	NaN	NaN	NaN	NaN	NaN
12.9457	-0.311435	0.525702	12.7519	-0.304952	0.424497	NaN	NaN	NaN	NaN	NaN	NaN
12.9629	-0.323279	0.528199	12.762	-0.308025	0.418821	NaN	NaN	NaN	NaN	NaN	NaN
12.9818	-0.334666	0.520123	12.7794	-0.370797	0.404618	NaN	NaN	NaN	NaN	NaN	NaN
12.9912	-0.308727	0.529037	12.7879	-0.378892	0.396554	NaN	NaN	NaN	NaN	NaN	NaN
12.997	-0.317879	0.526584	12.8001	-0.378163	0.403085	NaN	NaN	NaN	NaN	NaN	NaN
13.0038	-0.320654	0.518693	12.8138	-0.374473	0.39763	NaN	NaN	NaN	NaN	NaN	NaN
13.0059	-0.342336	0.518858	12.8269	-0.389351	0.397426	NaN	NaN	NaN	NaN	NaN	NaN
13.0146	-0.316774	0.52182	12.8277	-0.334746	0.413446	NaN	NaN	NaN	NaN	NaN	NaN
13.0332	-0.325489	0.51813	12.8446	-0.303359	0.426838	NaN	NaN	NaN	NaN	NaN	NaN
13.0519	-0.380119	0.50468	12.8609	-0.302013	0.423108	NaN	NaN	NaN	NaN	NaN	NaN
13.061	-0.379287	0.50455	12.8707	-0.325594	0.414689	NaN	NaN	NaN	NaN	NaN	NaN
13.0719	-0.388915	0.494269	12.8762	-0.290869	0.42449	NaN	NaN	NaN	NaN	NaN	NaN
13.0846	-0.362503	0.505186	12.8852	-0.233408	0.423671	NaN	NaN	NaN	NaN	NaN	NaN
13.1039	-0.389325	0.504114	12.9014	-0.282789	0.398918	NaN	NaN	NaN	NaN	NaN	NaN
13.1195	-0.337276	0.50633	12.9111	-0.274816	0.404538	NaN	NaN	NaN	NaN	NaN	NaN
13.1293	-0.358743	0.509409	12.9276	-0.262238	0.409509	NaN	NaN	NaN	NaN	NaN	NaN
13.1366	-0.343922	0.508394	12.9446	-0.281925	0.407223	NaN	NaN	NaN	NaN	NaN	NaN
13.1523	-0.407028	0.496638	12.9571	-0.3105	0.406245	NaN	NaN	NaN	NaN	NaN	NaN
13.1455	-0.350674	0.496613	12.965	-0.312676	0.405025	NaN	NaN	NaN	NaN	NaN	NaN
13.1508	-0.299565	0.499467	12.9757	-0.279367	0.406024	NaN	NaN	NaN	NaN	NaN	NaN
13.1633	-0.310597	0.501274	12.9837	-0.306975	0.401249	NaN	NaN	NaN	NaN	NaN	NaN
13.1729	-0.285738	0.507485	12.9949	-0.313143	0.395153	NaN	NaN	NaN	NaN	NaN	NaN
13.1938	-0.280207	0.499703	13.0043	-0.310449	0.398474	NaN	NaN	NaN	NaN	NaN	NaN
13.2099	-0.286934	0.504869	13.0141	-0.269681	0.406222	NaN	NaN	NaN	NaN	NaN	NaN
13.2215	-0.31895	0.498293	13.0226	-0.279011	0.404027	NaN	NaN	NaN	NaN	NaN	NaN
13.2252	-0.281117	0.507246	13.0402	-0.284398	0.406382	NaN	NaN	NaN	NaN	NaN	NaN
13.2476	-0.354895	0.483905	13.0579	-0.277479	0.406257	NaN	NaN	NaN	NaN	NaN	NaN
13.2604	-0.351048	0.487169	13.0733	-0.274486	0.406847	NaN	NaN	NaN	NaN	NaN	NaN
13.2785	-0.349567	0.489907	13.0879	-0.276093	0.408879	NaN	NaN	NaN	NaN	NaN	NaN
13.2891	-0.317302	0.487804	13.0991	-0.297029	0.396724	NaN	NaN	NaN	NaN	NaN	NaN
13.2998	-0.368939	0.48385	13.1077	-0.275889	0.407958	NaN	NaN	NaN	NaN	NaN	NaN
13.3057	-0.356982	0.479365	13.1144	-0.274765	0.400383	NaN	NaN	NaN	NaN	NaN	NaN
13.3021	-0.304748	0.48122	13.1231	-0.28505	0.40034	NaN	NaN	NaN	NaN	NaN	NaN
13.3057	-0.292312	0.483642	13.1332	-0.312043	0.393064	NaN	NaN	NaN	NaN	NaN	NaN
13.3233	-0.315858	0.47324	13.1392	-0.310436	0.386276	NaN	NaN	NaN	NaN	NaN	NaN
13.3413	-0.352247	0.465381	13.1509	-0.35428	0.37788	NaN	NaN	NaN	NaN	NaN	NaN
13.3559	-0.328791	0.46604	13.159	-0.322923	0.385253	NaN	NaN	NaN	NaN	NaN	NaN
13.3632	-0.338936	0.467829	13.1669	-0.272627	0.38768	NaN	NaN	NaN	NaN	NaN	NaN
13.3804	-0.376697	0.461969	13.1825	-0.251045	0.386502	NaN	NaN	NaN	NaN	NaN	NaN
13.3908	-0.343985	0.465736	13.1953	-0.283359	0.375915	NaN	NaN	NaN	NaN	NaN	NaN
13.4029	-0.361691	0.460936	13.2022	-0.195917	0.389295	NaN	NaN	NaN	NaN	NaN	NaN
13.4104	-0.333376	0.469937	13.214	-0.196383	0.384176	NaN	NaN	NaN	NaN	NaN	NaN
13.4215	-0.322694	0.468949	13.228	-0.215202	0.381153	NaN	NaN	NaN	NaN	NaN	NaN
13.4313	-0.329989	0.465584	13.2464	-0.243164	0.372204	NaN	NaN	NaN	NaN	NaN	NaN
13.446	-0.31532	0.468042	13.2497	-0.273229	0.362925	NaN	NaN	NaN	NaN	NaN	NaN
13.4486	-0.332566	0.464773	13.2542	-0.248413	0.363914	NaN	NaN	NaN	NaN	NaN	NaN
13.4567	-0.358439	0.462056	13.2659	-0.25006	0.368862	NaN	NaN	NaN	NaN	NaN	NaN
13.4592	-0.339116	0.462144	13.2833	-0.262206	0.36632	NaN	NaN	NaN	NaN	NaN	NaN
13.4833	-0.395233	0.452193	13.2841	-0.243858	0.35719	NaN	NaN	NaN	NaN	NaN	NaN
13.4954	-0.363933	0.445587	13.2871	-0.19096	0.362692	NaN	NaN	NaN	NaN	NaN	NaN
13.5143	-0.338147	0.448502	13.285	-0.136343	0.368922	NaN	NaN	NaN	NaN	NaN	NaN
13.519	-0.328019	0.451169	13.306	-0.106891	0.370263	NaN	NaN	NaN	NaN	NaN	NaN
13.5305	-0.365231	0.438624	13.3256	-0.158611	0.359635	NaN	NaN	NaN	NaN	NaN	NaN
13.5289	-0.322523	0.441173	13.3333	-0.091958	0.371903	NaN	NaN	NaN	NaN	NaN	NaN
13.5372	-0.337686	0.443196	13.3495	-0.142194	0.353329	NaN	NaN	NaN	NaN	NaN	NaN
13.5436	-0.285658	0.455189	13.36	-0.155519	0.3521	NaN	NaN	NaN	NaN	NaN	NaN
13.5507	-0.297155	0.451171	13.3715	-0.169729	0.345225	NaN	NaN	NaN	NaN	NaN	NaN
13.5585	-0.330502	0.439547	13.3792	-0.184677	0.345024	NaN	NaN	NaN	NaN	NaN	NaN
13.5698	-0.310902	0.444222	13.3822	-0.165171	0.342001	NaN	NaN	NaN	NaN	NaN	NaN
13.5802	-0.327981	0.443168	13.3868	-0.17189	0.345768	NaN	NaN	NaN	NaN	NaN	NaN
13.609	-0.363587	0.437182	13.4077	-0.190387	0.338398	NaN	NaN	NaN	NaN	NaN	NaN
13.6267	-0.293077	0.449461	13.42	-0.236178	0.327427	NaN	NaN	NaN	NaN	NaN	NaN
13.6488	-0.32652	0.448287	13.4353	-0.265949	0.323238	NaN	NaN	NaN	NaN	NaN	NaN
13.6454	-0.283805	0.439897	13.439	-0.197104	0.340212	NaN	NaN	NaN	NaN	NaN	NaN
13.6568	-0.294984	0.443556	13.4468	-0.147608	0.351767	NaN	NaN	NaN	NaN	NaN	NaN
13.6549	-0.206621	0.452763	13.462	-0.144526	0.353211	NaN	NaN	NaN	NaN	NaN	NaN
13.6715	-0.252472	0.444831	13.4853	-0.244662	0.31849	NaN	NaN	NaN	NaN	NaN	NaN
13.6847	-0.310034	0.430002	13.4893	-0.225247	0.327928	NaN	NaN	NaN	NaN	NaN	NaN
13.6935	-0.309939	0.429653	13.5016	-0.236053	0.32149	NaN	NaN	NaN	NaN	NaN	NaN
13.6986	-0.309059	0.421835	13.5114	-0.218845	0.33116	NaN	NaN	NaN	NaN	NaN	NaN
13.6987	-0.310637	0.41855	13.5203	-0.22652	0.324104	NaN	NaN	NaN	NaN	NaN	NaN
13.7001	-0.303749	0.418717	13.5405	-0.287635	0.30561	NaN	NaN	NaN	NaN	NaN	NaN
13.7077	-0.23119	0.426847	13.5543	-0.310852	0.301167	NaN	NaN	NaN	NaN	NaN	NaN
13.7227	-0.215665	0.431329	13.5641	-0.299436	0.307591	NaN	NaN	NaN	NaN	NaN	NaN
13.7393	-0.217274	0.432193	13.5771	-0.28417	0.306788	NaN	NaN	NaN	NaN	NaN	NaN
13.7595	-0.268826	0.41725	13.5774	-0.28165	0.306264	NaN	NaN	NaN	NaN	NaN	NaN
13.7767	-0.306015	0.409852	13.5816	-0.231109	0.30369	NaN	NaN	NaN	NaN	NaN	NaN
13.7892	-0.333593	0.405143	13.5844	-0.213859	0.306217	NaN	NaN	NaN	NaN	NaN	NaN
13.8024	-0.318437	0.401723	13.5963	-0.243907	0.297817	NaN	NaN	NaN	NaN	NaN	NaN
13.814	-0.324664	0.400489	13.6082	-0.181481	0.302447	NaN	NaN	NaN	NaN	NaN	NaN
13.8229	-0.322925	0.404115	13.6123	-0.131571	0.313203	NaN	NaN	NaN	NaN	NaN	NaN
13.8253	-0.299502	0.40555	13.6327	-0.169685	0.294867	NaN	NaN	NaN	NaN	NaN	NaN
13.8396	-0.308715	0.404039	13.6452	-0.207296	0.284653	NaN	NaN	NaN	NaN	NaN	NaN
13.8435	-0.264203	0.411877	13.6554	-0.185834	0.292555	NaN	NaN	NaN	NaN	NaN	NaN
13.8543	-0.295294	0.401926	13.6712	-0.226836	0.280423	NaN	NaN	NaN	NaN	NaN	NaN
13.8509	-0.275527	0.408121	13.6828	-0.195003	0.289649	NaN	NaN	NaN	NaN	NaN	NaN
13.8741	-0.313672	0.395102	13.7004	-0.206519	0.287546	NaN	NaN	NaN	NaN	NaN	NaN
13.8912	-0.309277	0.399937	13.7171	-0.222807	0.281324	NaN	NaN	NaN	NaN	NaN	NaN
13.9073	-0.30321	0.406221	13.7254	-0.226915	0.279447	NaN	NaN	NaN	NaN	NaN	NaN
13.9091	-0.272315	0.390366	13.7314	-0.199459	0.288891	NaN	NaN	NaN	NaN	NaN	NaN
13.9231	-0.300121	0.385197	13.7419	-0.188272	0.287877	NaN	NaN	NaN	NaN	NaN	NaN
13.9365	-0.322923	0.380522	13.7448	-0.197223	0.290267	NaN	NaN	NaN	NaN	NaN	NaN
13.9531	-0.29468	0.383057	13.754	-0.196787	0.28612	NaN	NaN	NaN	NaN	NaN	NaN
13.9584	-0.277254	0.393344	13.7788	-0.262579	0.269656	NaN	NaN	NaN	NaN	NaN	NaN
13.9663	-0.248811	0.395381	13.7863	-0.246943	0.27075	NaN	NaN	NaN	NaN	NaN	NaN
13.977	-0.298595	0.37839	13.8004	-0.282311	0.262484	NaN	NaN	NaN	NaN	NaN	NaN
13.9772	-0.262718	0.388917	13.805	-0.24241	0.270557	NaN	NaN	NaN	NaN	NaN	NaN
13.9891	-0.231976	0.384026	13.8095	-0.243991	0.260851	NaN	NaN	NaN	NaN	NaN	NaN
13.9976	-0.203853	0.391815	13.8109	-0.185742	0.270978	NaN	NaN	NaN	NaN	NaN	NaN
14.025	-0.29666	0.364392	13.8251	-0.212714	0.266489	NaN	NaN	NaN	NaN	NaN	NaN
14.0385	-0.273917	0.370147	13.829	-0.178686	0.270366	NaN	NaN	NaN	NaN	NaN	NaN
14.0527	-0.266523	0.369783	13.8464	-0.198291	0.266182	NaN	NaN	NaN	NaN	NaN	NaN
14.0747	-0.344688	0.348682	13.8518	-0.182396	0.270997	NaN	NaN	NaN	NaN	NaN	NaN
14.0789	-0.3129	0.353239	13.8652	-0.179803	0.268749	NaN	NaN	NaN	NaN	NaN	NaN
14.0949	-0.385034	0.339308	13.887	-0.267303	0.2471	NaN	NaN	NaN	NaN	NaN	NaN
14.0988	-0.331085	0.350013	13.8947	-0.257726	0.241581	NaN	NaN	NaN	NaN	NaN	NaN
14.1075	-0.343005	0.342354	13.9045	-0.285842	0.24029	NaN	NaN	NaN	NaN	NaN	NaN
14.1178	-0.33057	0.349456	13.9032	-0.249699	0.243857	NaN	NaN	NaN	NaN	NaN	NaN
14.1246	-0.345429	0.341959	13.9091	-0.255364	0.243683	NaN	NaN	NaN	NaN	NaN	NaN
14.1256	-0.34652	0.341151	13.9132	-0.250189	0.245431	NaN	NaN	NaN	NaN	NaN	NaN
14.1241	-0.333169	0.340741	13.9316	-0.267787	0.236534	NaN	NaN	NaN	NaN	NaN	NaN
14.1252	-0.254717	0.344735	13.9669	-0.315128	0.226235	NaN	NaN	NaN	NaN	NaN	NaN
14.1497	-0.306181	0.335988	13.9869	-0.321961	0.227477	NaN	NaN	NaN	NaN	NaN	NaN
14.1702	-0.3234	0.33107	13.9984	-0.325226	0.226934	NaN	NaN	NaN	NaN	NaN	NaN
14.1877	-0.31775	0.328443	14.0031	-0.292877	0.223536	NaN	NaN	NaN	NaN	NaN	NaN
14.215	-0.321423	0.32933	14.0099	-0.29108	0.227872	NaN	NaN	NaN	NaN	NaN	NaN
14.2272	-0.316174	0.334306	14.0242	-0.306393	0.226277	NaN	NaN	NaN	NaN	NaN	NaN
14.2465	-0.338852	0.327144	14.0306	-0.264629	0.226859	NaN	NaN	NaN	NaN	NaN	NaN
14.2243	-0.279327	0.320604	14.0379	-0.204857	0.232028	NaN	NaN	NaN	NaN	NaN	NaN
14.2238	-0.261728	0.322873	14.05	-0.231989	0.22948	NaN	NaN	NaN	NaN	NaN	NaN
14.2314	-0.251694	0.324371	14.0478	-0.210009	0.231469	NaN	NaN	NaN	NaN	NaN	NaN
14.2515	-0.262554	0.321155	14.0622	-0.253586	0.22357	NaN	NaN	NaN	NaN	NaN	NaN
14.2506	-0.193694	0.333694	14.0647	-0.232979	0.225382	NaN	NaN	NaN	NaN	NaN	NaN
14.2573	-0.182139	0.325052	14.0827	-0.291639	0.211142	NaN	NaN	NaN	NaN	NaN	NaN
14.2706	-0.21431	0.326479	14.0963	-0.297098	0.203533	NaN	NaN	NaN	NaN	NaN	NaN
14.2759	-0.221357	0.316856	14.1082	-0.314499	0.205788	NaN	NaN	NaN	NaN	NaN	NaN
14.2927	-0.291938	0.305089	14.117	-0.30255	0.205746	NaN	NaN	NaN	NaN	NaN	NaN
14.318	-0.328281	0.294053	14.1187	-0.230631	0.209393	NaN	NaN	NaN	NaN	NaN	NaN
14.3318	-0.366361	0.286377	14.1281	-0.185677	0.209642	NaN	NaN	NaN	NaN	NaN	NaN
14.3429	-0.335369	0.287865	14.1274	-0.139585	0.211036	NaN	NaN	NaN	NaN	NaN	NaN
14.3551	-0.29584	0.293028	14.1365	-0.153014	0.208545	NaN	NaN	NaN	NaN	NaN	NaN
14.3678	-0.304209	0.288059	14.1679	-0.242186	0.199534	NaN	NaN	NaN	NaN	NaN	NaN
14.3816	-0.286291	0.292126	14.1741	-0.24736	0.203219	NaN	NaN	NaN	NaN	NaN	NaN
14.3986	-0.304846	0.290659	14.1717	-0.219831	0.206269	NaN	NaN	NaN	NaN	NaN	NaN
14.395	-0.251858	0.29129	14.184	-0.23918	0.204811	NaN	NaN	NaN	NaN	NaN	NaN
14.3965	-0.232168	0.286736	14.2061	-0.242665	0.199847	NaN	NaN	NaN	NaN	NaN	NaN
14.4046	-0.280936	0.26594	14.2095	-0.247356	0.200041	NaN	NaN	NaN	NaN	NaN	NaN
14.4137	-0.296951	0.260344	14.2108	-0.198997	0.209193	NaN	NaN	NaN	NaN	NaN	NaN
14.4196	-0.304301	0.263822	14.2151	-0.262266	0.195512	NaN	NaN	NaN	NaN	NaN	NaN
14.4423	-0.335038	0.256034	14.23	-0.251454	0.188276	NaN	NaN	NaN	NaN	NaN	NaN
14.4637	-0.360451	0.248979	14.2394	-0.220153	0.187491	NaN	NaN	NaN	NaN	NaN	NaN
14.4755	-0.352393	0.247386	14.2458	-0.226405	0.185843	NaN	NaN	NaN	NaN	NaN	NaN
14.4823	-0.313318	0.250018	14.2488	-0.191127	0.192931	NaN	NaN	NaN	NaN	NaN	NaN
14.4812	-0.268775	0.256037	14.2672	-0.234477	0.180613	NaN	NaN	NaN	NaN	NaN	NaN
14.5016	-0.295417	0.248258	14.2864	-0.183392	0.187821	NaN	NaN	NaN	NaN	NaN	NaN
14.5054	-0.257395	0.251083	14.3057	-0.202078	0.181003	NaN	NaN	NaN	NaN	NaN	NaN
14.5276	-0.293137	0.249616	14.3106	-0.151837	0.182091	NaN	NaN	NaN	NaN	NaN	NaN
14.5426	-0.270456	0.25122	14.3233	-0.220283	0.170349	NaN	NaN	NaN	NaN	NaN	NaN
14.5653	-0.28367	0.249934	14.3279	-0.201669	0.165749	NaN	NaN	NaN	NaN	NaN	NaN
14.5675	-0.254713	0.255157	14.3316	-0.187869	0.170842	NaN	NaN	NaN	NaN	NaN	NaN
14.5744	-0.298209	0.246313	14.3513	-0.191981	0.167718	NaN	NaN	NaN	NaN	NaN	NaN
14.5689	-0.226395	0.249513	14.3747	-0.229189	0.158912	NaN	NaN	NaN	NaN	NaN	NaN
14.5741	-0.236661	0.237514	14.3844	-0.247126	0.146888	NaN	NaN	NaN	NaN	NaN	NaN
14.5862	-0.313358	0.225641	14.3932	-0.255893	0.147439	NaN	NaN	NaN	NaN	NaN	NaN
14.5879	-0.28423	0.225333	14.406	-0.281303	0.144715	NaN	NaN	NaN	NaN	NaN	NaN
14.5911	-0.258415	0.225854	14.4057	-0.210527	0.150045	NaN	NaN	NaN	NaN	NaN	NaN
14.6149	-0.296172	0.226144	14.409	-0.194232	0.145891	NaN	NaN	NaN	NaN	NaN	NaN
14.6239	-0.259594	0.235862	14.4063	-0.146128	0.156952	NaN	NaN	NaN	NaN	NaN	NaN
14.6516	-0.305398	0.228255	14.4349	-0.257934	0.129959	NaN	NaN	NaN	NaN	NaN	NaN
14.663	-0.276799	0.211834	14.4618	-0.267611	0.127995	NaN	NaN	NaN	NaN	NaN	NaN
14.6835	-0.308805	0.208693	14.4726	-0.261592	0.129769	NaN	NaN	NaN	NaN	NaN	NaN
14.6958	-0.313678	0.210547	14.4802	-0.263789	0.124642	NaN	NaN	NaN	NaN	NaN	NaN
14.6892	-0.30919	0.214004	14.4836	-0.211972	0.143249	NaN	NaN	NaN	NaN	NaN	NaN
14.6915	-0.310322	0.200917	14.497	-0.174615	0.138607	NaN	NaN	NaN	NaN	NaN	NaN
14.7026	-0.272693	0.199196	14.5139	-0.20212	0.123588	NaN	NaN	NaN	NaN	NaN	NaN
14.7309	-0.326622	0.189362	14.5283	-0.185832	0.128716	NaN	NaN	NaN	NaN	NaN	NaN
14.7481	-0.338436	0.187965	14.5312	-0.172143	0.134318	NaN	NaN	NaN	NaN	NaN	NaN
14.7595	-0.314821	0.189721	14.5403	-0.165846	0.13054	NaN	NaN	NaN	NaN	NaN	NaN
14.7537	-0.285297	0.198163	14.5513	-0.172823	0.132634	NaN	NaN	NaN	NaN	NaN	NaN
14.7618	-0.314303	0.187945	14.5641	-0.196709	0.120019	NaN	NaN	NaN	NaN	NaN	NaN
14.7706	-0.329137	0.189039	14.5731	-0.194951	0.11445	NaN	NaN	NaN	NaN	NaN	NaN
14.7945	-0.33745	0.193666	14.5899	-0.240633	0.103894	NaN	NaN	NaN	NaN	NaN	NaN
14.7936	-0.263842	0.192483	14.5914	-0.213166	0.110563	NaN	NaN	NaN	NaN	NaN	NaN
14.8082	-0.292991	0.186857	14.6186	-0.247376	0.0966	NaN	NaN	NaN	NaN	NaN	NaN
14.8163	-0.293158	0.191859	14.6318	-0.234949	0.090556	NaN	NaN	NaN	NaN	NaN	NaN
14.8271	-0.300438	0.192248	14.6272	-0.174258	0.104149	NaN	NaN	NaN	NaN	NaN	NaN
14.8454	-0.331421	0.180718	14.6296	-0.167912	0.10863	NaN	NaN	NaN	NaN	NaN	NaN
14.8568	-0.302738	0.1892	14.6375	-0.143267	0.116158	NaN	NaN	NaN	NaN	NaN	NaN
14.8798	-0.356243	0.176204	14.6587	-0.210252	0.091725	NaN	NaN	NaN	NaN	NaN	NaN
14.8935	-0.346873	0.169375	14.6727	-0.230469	0.091413	NaN	NaN	NaN	NaN	NaN	NaN
14.9156	-0.4032	0.162859	14.6903	-0.227894	0.090014	NaN	NaN	NaN	NaN	NaN	NaN
14.9037	-0.316231	0.168273	14.7042	-0.227133	0.092739	NaN	NaN	NaN	NaN	NaN	NaN
14.9012	-0.304474	0.163821	14.7306	-0.314139	0.072593	NaN	NaN	NaN	NaN	NaN	NaN
14.9054	-0.310261	0.164923	14.7338	-0.302038	0.067594	NaN	NaN	NaN	NaN	NaN	NaN
14.9043	-0.30728	0.168762	14.7419	-0.259481	0.078464	NaN	NaN	NaN	NaN	NaN	NaN
14.9229	-0.274247	0.166527	14.7651	-0.33557	0.05796	NaN	NaN	NaN	NaN	NaN	NaN
14.9266	-0.20188	0.175659	14.7676	-0.272559	0.071058	NaN	NaN	NaN	NaN	NaN	NaN
14.955	-0.276566	0.170648	14.7709	-0.279573	0.062769	NaN	NaN	NaN	NaN	NaN	NaN
14.971	-0.293144	0.17083	14.7766	-0.277195	0.067496	NaN	NaN	NaN	NaN	NaN	NaN
14.987	-0.304565	0.171058	14.7839	-0.30037	0.063108	NaN	NaN	NaN	NaN	NaN	NaN
15.0024	-0.361429	0.148128	14.7951	-0.232281	0.072857	NaN	NaN	NaN	NaN	NaN	NaN
15.0168	-0.367575	0.137865	14.8053	-0.239671	0.051684	NaN	NaN	NaN	NaN	NaN	NaN
15.0156	-0.320095	0.143358	14.8043	-0.177758	0.05967	NaN	NaN	NaN	NaN	NaN	NaN
15.0269	-0.32059	0.146244	14.815	-0.179054	0.055836	NaN	NaN	NaN	NaN	NaN	NaN
15.0466	-0.341881	0.136911	14.8302	-0.215034	0.049976	NaN	NaN	NaN	NaN	NaN	NaN
15.0524	-0.330617	0.122983	14.8408	-0.185607	0.05263	NaN	NaN	NaN	NaN	NaN	NaN
15.0625	-0.303679	0.130123	14.8666	-0.2299	0.046532	NaN	NaN	NaN	NaN	NaN	NaN
15.0737	-0.295422	0.128288	14.8805	-0.254654	0.036027	NaN	NaN	NaN	NaN	NaN	NaN
15.0781	-0.310633	0.126597	14.8933	-0.284213	0.030345	NaN	NaN	NaN	NaN	NaN	NaN
15.0751	-0.233007	0.138016	14.896	-0.239673	0.033864	NaN	NaN	NaN	NaN	NaN	NaN
15.0932	-0.299715	0.128517	14.9114	-0.282488	0.029915	NaN	NaN	NaN	NaN	NaN	NaN
15.1061	-0.269787	0.133192	14.9188	-0.264116	0.029916	NaN	NaN	NaN	NaN	NaN	NaN
15.1188	-0.223602	0.134402	14.9357	-0.286835	0.023327	NaN	NaN	NaN	NaN	NaN	NaN
15.1299	-0.197474	0.134987	14.945	-0.271217	0.029841	NaN	NaN	NaN	NaN	NaN	NaN
15.1416	-0.199121	0.136111	14.9455	-0.25337	0.026086	NaN	NaN	NaN	NaN	NaN	NaN
15.1596	-0.209377	0.1317	14.9551	-0.243076	0.027486	NaN	NaN	NaN	NaN	NaN	NaN
15.1693	-0.258218	0.12326	14.9643	-0.229371	0.021405	NaN	NaN	NaN	NaN	NaN	NaN
15.168	-0.223812	0.127009	14.9846	-0.217233	0.028355	NaN	NaN	NaN	NaN	NaN	NaN
15.1671	-0.209875	0.129901	14.9902	-0.182051	0.03483	NaN	NaN	NaN	NaN	NaN	NaN
15.1785	-0.242841	0.12443	15.0066	-0.251622	0.013185	NaN	NaN	NaN	NaN	NaN	NaN
15.2119	-0.318949	0.10268	15.014	-0.289683	7.7e-05	NaN	NaN	NaN	NaN	NaN	NaN
15.2201	-0.26492	0.11459	15.0255	-0.258758	0.006881	NaN	NaN	NaN	NaN	NaN	NaN
15.2354	-0.228471	0.116434	15.0458	-0.280357	0.005069	NaN	NaN	NaN	NaN	NaN	NaN
15.2585	-0.300538	0.10129	15.0511	-0.273744	0.010827	NaN	NaN	NaN	NaN	NaN	NaN
15.2507	-0.247621	0.106882	15.0634	-0.299488	-0.006678	NaN	NaN	NaN	NaN	NaN	NaN
15.2463	-0.201578	0.107316	15.0817	-0.322883	-0.011956	NaN	NaN	NaN	NaN	NaN	NaN
15.2623	-0.207314	0.108695	15.0893	-0.308603	-0.010366	NaN	NaN	NaN	NaN	NaN	NaN
15.2648	-0.15584	0.116376	15.1019	-0.306116	-0.016168	NaN	NaN	NaN	NaN	NaN	NaN
15.2769	-0.162056	0.115869	15.107	-0.301397	-0.012053	NaN	NaN	NaN	NaN	NaN	NaN
15.2955	-0.206628	0.103251	15.1156	-0.311175	-0.016163	NaN	NaN	NaN	NaN	NaN	NaN
15.3116	-0.249108	0.093501	15.1347	-0.308095	-0.017841	NaN	NaN	NaN	NaN	NaN	NaN
15.332	-0.295568	0.085581	15.1493	-0.338657	-0.016009	NaN	NaN	NaN	NaN	NaN	NaN
15.3429	-0.278543	0.081764	15.14	-0.234873	-0.007254	NaN	NaN	NaN	NaN	NaN	NaN
15.3469	-0.283813	0.082995	15.1614	-0.3122	-0.028967	NaN	NaN	NaN	NaN	NaN	NaN
15.3466	-0.249717	0.089406	15.1725	-0.312005	-0.038639	NaN	NaN	NaN	NaN	NaN	NaN
15.3578	-0.272556	0.088527	15.1861	-0.338046	-0.039279	NaN	NaN	NaN	NaN	NaN	NaN
15.3846	-0.330921	0.066709	15.1862	-0.224929	-0.026212	NaN	NaN	NaN	NaN	NaN	NaN
15.3891	-0.293257	0.069788	15.1987	-0.257798	-0.040714	NaN	NaN	NaN	NaN	NaN	NaN
15.4017	-0.323676	0.065653	15.2115	-0.261346	-0.045159	NaN	NaN	NaN	NaN	NaN	NaN
15.4048	-0.274626	0.072783	15.2237	-0.292967	-0.050646	NaN	NaN	NaN	NaN	NaN	NaN
15.4076	-0.25454	0.067965	15.2423	-0.323438	-0.058484	NaN	NaN	NaN	NaN	NaN	NaN
15.4044	-0.236468	0.065744	15.2485	-0.299036	-0.051441	NaN	NaN	NaN	NaN	NaN	NaN
15.4284	-0.254723	0.062794	15.2614	-0.324512	-0.06067	NaN	NaN	NaN	NaN	NaN	NaN
15.4539	-0.312164	0.051001	15.2704	-0.302863	-0.051798	NaN	NaN	NaN	NaN	NaN	NaN
15.4861	-0.379566	0.029055	15.2817	-0.304702	-0.052304	NaN	NaN	NaN	NaN	NaN	NaN
15.5022	-0.378664	0.029267	15.2878	-0.246729	-0.04706	NaN	NaN	NaN	NaN	NaN	NaN
15.5171	-0.39112	0.02437	15.2914	-0.238834	-0.054296	NaN	NaN	NaN	NaN	NaN	NaN
15.5149	-0.379613	0.028984	15.3004	-0.23884	-0.050705	NaN	NaN	NaN	NaN	NaN	NaN
15.524	-0.385464	0.017528	15.3213	-0.294998	-0.07479	NaN	NaN	NaN	NaN	NaN	NaN
15.5431	-0.417923	0.015664	15.3291	-0.295433	-0.06916	NaN	NaN	NaN	NaN	NaN	NaN
15.5505	-0.392526	0.001115	15.3403	-0.291519	-0.07681	NaN	NaN	NaN	NaN	NaN	NaN
15.557	-0.361444	0.010207	15.3486	-0.280807	-0.070693	NaN	NaN	NaN	NaN	NaN	NaN
15.5575	-0.28979	0.022193	15.3611	-0.296301	-0.075668	NaN	NaN	NaN	NaN	NaN	NaN
15.5542	-0.210314	0.036029	15.3674	-0.281433	-0.069452	NaN	NaN	NaN	NaN	NaN	NaN
15.5569	-0.185444	0.03453	15.3812	-0.289934	-0.075083	NaN	NaN	NaN	NaN	NaN	NaN
15.5717	-0.23037	0.015587	15.3797	-0.230542	-0.066467	NaN	NaN	NaN	NaN	NaN	NaN
15.5853	-0.275166	0.003796	15.3947	-0.251956	-0.085354	NaN	NaN	NaN	NaN	NaN	NaN
15.5988	-0.236096	0.009435	15.407	-0.257261	-0.086575	NaN	NaN	NaN	NaN	NaN	NaN
15.612	-0.206672	0.017227	15.4247	-0.281493	-0.091224	NaN	NaN	NaN	NaN	NaN	NaN
15.6219	-0.233035	0.015528	15.4368	-0.303057	-0.10065	NaN	NaN	NaN	NaN	NaN	NaN
15.6249	-0.24605	0.000325	15.4421	-0.299766	-0.098417	NaN	NaN	NaN	NaN	NaN	NaN
15.6381	-0.273903	-0.007463	15.435	-0.206566	-0.09163	NaN	NaN	NaN	NaN	NaN	NaN
15.6478	-0.309083	-0.008531	15.4384	-0.179849	-0.087598	NaN	NaN	NaN	NaN	NaN	NaN
15.653	-0.290052	-0.008232	15.452	-0.207405	-0.089624	NaN	NaN	NaN	NaN	NaN	NaN
15.6712	-0.326645	-0.020552	15.4926	-0.277011	-0.100685	NaN	NaN	NaN	NaN	NaN	NaN
15.6906	-0.352166	-0.034497	15.5118	-0.30129	-0.119261	NaN	NaN	NaN	NaN	NaN	NaN
15.6939	-0.30576	-0.019353	15.5129	-0.307563	-0.121718	NaN	NaN	NaN	NaN	NaN	NaN
15.7185	-0.3512	-0.028582	15.5217	-0.343602	-0.136079	NaN	NaN	NaN	NaN	NaN	NaN
15.7357	-0.319234	-0.030207	15.5314	-0.334043	-0.14185	NaN	NaN	NaN	NaN	NaN	NaN
15.7485	-0.340894	-0.019504	15.5486	-0.399925	-0.159578	NaN	NaN	NaN	NaN	NaN	NaN
15.7576	-0.37397	-0.038109	15.5654	-0.371488	-0.14728	NaN	NaN	NaN	NaN	NaN	NaN
15.756	-0.34925	-0.033155	15.5885	-0.382429	-0.147539	NaN	NaN	NaN	NaN	NaN	NaN
15.7625	-0.35115	-0.035015	15.6009	-0.409808	-0.154901	15.6677	-0.310329	-0.043245	15.5254	-0.484806	0.070091
15.7688	-0.328086	-0.042705	15.5977	-0.345959	-0.146366	15.6793	-0.361393	-0.054845	15.5472	-0.437463	0.085324
15.7771	-0.355888	-0.057681	15.6087	-0.334178	-0.155375	15.6816	-0.330228	-0.046604	15.5742	-0.516872	0.036226
15.8002	-0.353853	-0.056607	15.6145	-0.328745	-0.156497	15.7042	-0.385008	-0.053664	15.6547	-0.561753	-0.03194
15.8074	-0.323105	-0.044501	15.631	-0.330849	-0.15441	15.7112	-0.359099	-0.054027	15.7233	-0.373351	-0.072966
15.8223	-0.320025	-0.048738	15.6437	-0.331988	-0.152166	15.7214	-0.352643	-0.051071	15.8105	-0.259681	-0.091875
15.8468	-0.368348	-0.060611	15.6487	-0.314841	-0.15199	15.7328	-0.36716	-0.061242	15.8425	-0.106489	-0.066604
15.8554	-0.337933	-0.050705	15.6644	-0.348518	-0.158042	15.7464	-0.361375	-0.053403	15.8596	-0.037192	-0.045032
15.8613	-0.319975	-0.047081	15.68	-0.373945	-0.17167	15.7524	-0.352654	-0.05507	15.8693	-0.0551	-0.058236
15.8679	-0.313355	-0.049639	15.6862	-0.348863	-0.169449	15.7506	-0.286011	-0.048674	15.8149	-0.167718	-0.093424
15.8752	-0.330588	-0.057114	15.6962	-0.317048	-0.170008	15.7617	-0.307629	-0.062492	15.7159	-0.109172	-0.066126
15.8695	-0.329546	-0.058536	15.7155	-0.345627	-0.179396	15.7839	-0.37956	-0.076772	15.6779	-0.38983	-0.031396
15.8809	-0.296728	-0.057896	15.7116	-0.311293	-0.170031	15.7914	-0.351066	-0.072324	15.6476	-0.387115	-4.4e-05
15.9076	-0.345729	-0.0749	15.7197	-0.300749	-0.168944	15.8053	-0.336083	-0.071212	15.641	-0.356897	0.025126
15.9213	-0.296846	-0.065613	15.7286	-0.265396	-0.171874	15.816	-0.317135	-0.068	15.6567	-0.417907	0.021656
15.9382	-0.379454	-0.0829	15.741	-0.295508	-0.183652	15.8361	-0.388597	-0.086944	15.7403	-0.709885	-0.056558
15.9521	-0.405793	-0.095419	15.7478	-0.289831	-0.193787	15.845	-0.393743	-0.094166	15.7578	-0.498474	-0.059644
15.9647	-0.405862	-0.096514	15.7506	-0.259052	-0.187885	15.8547	-0.394018	-0.092267	15.8571	-0.5856	-0.118985
15.9759	-0.412475	-0.100275	15.7563	-0.255766	-0.199124	15.8731	-0.401273	-0.094845	15.9378	-0.473714	-0.138461
15.9861	-0.394598	-0.091524	15.7746	-0.297256	-0.209699	15.8924	-0.413974	-0.09574	16.0083	-0.379237	-0.133099
15.9888	-0.350315	-0.087917	15.7829	-0.26855	-0.203323	15.8907	-0.356832	-0.089508	16.0353	-0.180197	-0.086309
16.0001	-0.349217	-0.08903	15.7957	-0.276588	-0.208667	15.9021	-0.379835	-0.096421	16.018	-0.079606	-0.099766
15.9993	-0.26687	-0.088139	15.8161	-0.325287	-0.216728	15.9103	-0.382627	-0.097034	15.9337	-0.200548	-0.106137
15.9894	-0.205025	-0.082866	15.8123	-0.285874	-0.21153	15.9095	-0.365252	-0.096079	15.8213	-0.203122	-0.082316
15.9944	-0.239173	-0.093766	15.8281	-0.312215	-0.219462	15.9251	-0.357672	-0.104776	15.7627	-0.253174	-0.044482
16.0078	-0.232369	-0.089922	15.8417	-0.318686	-0.218922	15.9366	-0.359268	-0.108783	15.7599	-0.445888	-0.023619
16.0496	-0.326743	-0.102052	15.8502	-0.301093	-0.213066	15.9519	-0.376699	-0.114436	15.783	-0.377699	-0.012653
16.0549	-0.330844	-0.110796	15.8624	-0.310008	-0.221589	15.9593	-0.379519	-0.110931	15.8004	-0.226775	-0.010777
16.0569	-0.329459	-0.120415	15.8754	-0.338808	-0.235086	15.9803	-0.400141	-0.117619	15.844	-0.359197	-0.064097
16.0776	-0.376418	-0.134909	15.8866	-0.371513	-0.241035	15.9788	-0.360274	-0.113188	15.957	-0.68562	-0.143471
16.0835	-0.377057	-0.133926	15.9067	-0.351765	-0.237988	15.9887	-0.369255	-0.110953	16.0088	-0.394515	-0.174901
16.0955	-0.398505	-0.137917	15.9135	-0.308661	-0.236688	15.9975	-0.360214	-0.125726	16.1144	-0.342375	-0.180325
16.1044	-0.391566	-0.135664	15.9192	-0.283608	-0.229731	16.0062	-0.341621	-0.130453	16.1786	-0.191827	-0.148617
16.1223	-0.389947	-0.134709	15.9218	-0.259106	-0.225988	16.0175	-0.332706	-0.133139	16.2146	-0.158916	-0.134093
16.135	-0.364397	-0.125538	15.9247	-0.230221	-0.225271	16.0221	-0.312738	-0.130101	16.1806	-0.168222	-0.15605
16.1407	-0.356594	-0.131238	15.9332	-0.2294	-0.233859	16.032	-0.324613	-0.139915	16.1044	-0.287026	-0.202801
16.1516	-0.373662	-0.138612	15.9331	-0.181343	-0.226374	16.0545	-0.415416	-0.15824	15.9983	-0.323963	-0.167552
16.1567	-0.351105	-0.128359	15.9727	-0.315763	-0.255208	16.0592	-0.378606	-0.15291	15.9009	-0.287948	-0.09331
16.1642	-0.341808	-0.129431	15.9812	-0.283577	-0.248295	16.07	-0.37232	-0.153023	15.9055	-0.310877	-0.04973
16.1774	-0.317954	-0.126287	15.9957	-0.278842	-0.251346	16.0766	-0.353762	-0.149447	15.9271	-0.312159	-0.025175
16.1806	-0.264103	-0.12653	15.9909	-0.230518	-0.246135	16.089	-0.374847	-0.153904	15.9669	-0.441154	-0.035391
16.2036	-0.356302	-0.153394	16.0069	-0.28219	-0.254513	16.0963	-0.371659	-0.15255	15.9878	-0.606929	-0.103456
16.2122	-0.313892	-0.148554	16.0299	-0.334661	-0.271884	16.095	-0.328423	-0.152366	16.0871	-0.73261	-0.160863
16.2268	-0.302389	-0.147768	16.0547	-0.384269	-0.281536	16.1031	-0.319338	-0.156969	16.2051	-0.778758	-0.223914
16.2418	-0.292898	-0.148632	16.0486	-0.302394	-0.271703	16.1175	-0.300585	-0.152853	16.2695	-0.482095	-0.227334
16.2504	-0.287197	-0.146983	16.0544	-0.272607	-0.27278	16.1343	-0.31011	-0.153955	16.3205	-0.215244	-0.168921
16.2454	-0.27603	-0.145384	16.0568	-0.251074	-0.26671	16.1351	-0.278224	-0.146334	16.3724	-0.291816	-0.163901
16.2492	-0.275157	-0.150406	16.0688	-0.255695	-0.271535	16.1546	-0.324133	-0.161966	16.3243	-0.122521	-0.144374
16.2708	-0.369929	-0.165955	16.081	-0.287822	-0.267042	16.1684	-0.362882	-0.173104	16.2711	-0.193902	-0.196695
16.2803	-0.360212	-0.172293	16.1015	-0.299543	-0.284485	16.1735	-0.34178	-0.172194	16.2482	-0.513851	-0.252863
16.2874	-0.349057	-0.169036	16.1203	-0.362605	-0.301173	16.1927	-0.378789	-0.175411	16.1199	-0.455104	-0.180966
16.2994	-0.37057	-0.184667	16.1222	-0.307911	-0.290463	16.1921	-0.324954	-0.167035	16.0534	-0.428828	-0.135526
16.3038	-0.359904	-0.188532	16.1395	-0.294313	-0.288975	16.193	-0.28941	-0.167834	16.0363	-0.348665	-0.083878
16.3016	-0.295628	-0.178351	16.1442	-0.307744	-0.302322	16.1935	-0.265486	-0.164585	16.0695	-0.444363	-0.104425
16.3123	-0.310466	-0.188076	16.1532	-0.328761	-0.317035	16.2075	-0.321346	-0.184298	16.122	-0.615865	-0.144339
16.3277	-0.365082	-0.195504	16.1493	-0.314282	-0.321001	16.2268	-0.3469	-0.193434	16.1619	-0.714671	-0.176675
16.3295	-0.336831	-0.191897	16.1661	-0.315092	-0.324839	16.2362	-0.355875	-0.191369	16.2365	-0.709632	-0.237925
16.3442	-0.3304	-0.18928	16.1761	-0.320182	-0.333818	16.2531	-0.33484	-0.201894	16.3048	-0.502008	-0.244507
16.3697	-0.365395	-0.192011	16.1869	-0.322239	-0.336606	16.2792	-0.352837	-0.209657	16.3978	-0.247735	-0.215646
16.3789	-0.335188	-0.182543	16.2097	-0.334376	-0.327234	16.2864	-0.324237	-0.206461	16.4411	-0.093966	-0.182849
16.3803	-0.328126	-0.184626	16.2368	-0.384347	-0.330919	16.2922	-0.304508	-0.198123	16.4604	-0.132613	-0.164852
16.3856	-0.284073	-0.187499	16.2388	-0.306545	-0.327876	16.3013	-0.284933	-0.196626	16.4716	-0.217023	-0.192473
16.3894	-0.23601	-0.185838	16.2412	-0.319739	-0.340192	16.3119	-0.256719	-0.185656	16.3805	-0.245639	-0.240068
16.4091	-0.253658	-0.18248	16.2597	-0.364651	-0.345749	16.3279	-0.341071	-0.21297	16.3097	-0.339407	-0.253482
16.4182	-0.229762	-0.180453	16.2717	-0.38363	-0.357022	16.3386	-0.35564	-0.21932	16.2179	-0.380949	-0.20988
16.4308	-0.252407	-0.184457	16.2722	-0.302373	-0.34211	16.3452	-0.341151	-0.211441	16.1668	-0.38018	-0.157513
16.4547	-0.32582	-0.203013	16.2884	-0.279854	-0.343559	16.3568	-0.328583	-0.209288	16.1859	-0.418953	-0.139276
16.467	-0.322146	-0.207336	16.31	-0.287616	-0.347731	16.359	-0.330623	-0.209864	16.1957	-0.356004	-0.124404
16.4667	-0.335648	-0.21405	16.3222	-0.340409	-0.352916	16.3663	-0.33827	-0.212454	16.2785	-0.590385	-0.186015
16.4753	-0.328774	-0.214719	16.3336	-0.37004	-0.354552	16.3723	-0.335374	-0.209558	16.3447	-0.643273	-0.234154
16.4926	-0.345737	-0.208597	16.3363	-0.361563	-0.346378	16.3925	-0.339487	-0.22043	16.4559	-0.546267	-0.241142
16.5049	-0.325163	-0.206335	16.3411	-0.353727	-0.349165	16.4023	-0.356489	-0.228725	16.528	-0.297216	-0.224311
16.5159	-0.305404	-0.202585	16.3639	-0.371987	-0.356269	16.4153	-0.373706	-0.233358	16.5953	-0.299715	-0.200379
16.5255	-0.332252	-0.206217	16.3722	-0.372616	-0.351128	16.4329	-0.394432	-0.229921	16.6385	-0.316962	-0.196627
16.5223	-0.280765	-0.201256	16.3719	-0.381207	-0.355855	16.4431	-0.326252	-0.220363	16.5997	-0.135175	-0.168164
16.5388	-0.311736	-0.21072	16.379	-0.372076	-0.355711	16.4675	-0.365835	-0.217938	16.5275	-0.146546	-0.210541
16.5398	-0.274499	-0.205884	16.3993	-0.420238	-0.368264	16.4618	-0.291884	-0.20552	16.5	-0.396779	-0.291076
16.5481	-0.278978	-0.209505	16.4091	-0.405039	-0.379214	16.4523	-0.290515	-0.219273	16.3702	-0.46605	-0.249918
16.5426	-0.220274	-0.202089	16.4155	-0.387564	-0.382088	16.4469	-0.262571	-0.229042	16.2968	-0.485207	-0.19364
16.562	-0.27196	-0.209669	16.4225	-0.35926	-0.372991	16.4595	-0.316258	-0.232508	16.3409	-0.632878	-0.184544
16.5671	-0.217589	-0.20024	16.4429	-0.402637	-0.37449	16.4646	-0.308171	-0.226638	16.325	-0.398781	-0.140894
16.5891	-0.274768	-0.209722	16.4645	-0.436214	-0.378028	16.4773	-0.321522	-0.228255	16.3858	-0.438621	-0.190735
16.6004	-0.272766	-0.203382	16.4629	-0.372105	-0.375069	16.4845	-0.320187	-0.228665	16.4371	-0.493936	-0.234468
16.6258	-0.321002	-0.208108	16.4701	-0.340679	-0.369073	16.5021	-0.313968	-0.228221	16.513	-0.432243	-0.272153
16.6337	-0.31252	-0.200758	16.4786	-0.359087	-0.371601	16.5193	-0.298293	-0.22115	16.6351	-0.498811	-0.295466
16.6582	-0.369456	-0.212213	16.4921	-0.371519	-0.376991	16.5387	-0.334009	-0.230584	16.6915	-0.272942	-0.259611
16.6709	-0.366164	-0.202474	16.4917	-0.348826	-0.368585	16.5565	-0.33639	-0.234766	16.7068	-0.041226	-0.200206
16.6725	-0.351087	-0.207868	16.4971	-0.31834	-0.37272	16.5619	-0.312317	-0.230198	16.7305	-0.138256	-0.196461
16.683	-0.372747	-0.214239	16.4926	-0.25661	-0.364122	16.5645	-0.281588	-0.221195	16.7252	-0.163705	-0.209705
16.6766	-0.325715	-0.217278	16.51	-0.2892	-0.37211	16.5883	-0.339194	-0.239739	16.642	-0.099524	-0.263685
16.6843	-0.346424	-0.23008	16.521	-0.265858	-0.362769	16.6074	-0.364544	-0.246381	16.5868	-0.273905	-0.288665
16.7005	-0.383962	-0.239438	16.5475	-0.33323	-0.375073	16.6182	-0.372885	-0.250521	16.4869	-0.266446	-0.243919
16.7187	-0.411036	-0.24301	16.5552	-0.333392	-0.36865	16.6303	-0.350297	-0.24723	16.4452	-0.342162	-0.206643
16.728	-0.396088	-0.252153	16.5696	-0.341307	-0.37052	16.6361	-0.374966	-0.248312	16.4372	-0.330392	-0.182111
16.7346	-0.384067	-0.248232	16.5619	-0.267539	-0.364247	16.6416	-0.379164	-0.251423	16.4396	-0.245694	-0.149915
16.7395	-0.33272	-0.240718	16.5648	-0.229583	-0.366964	16.6463	-0.375685	-0.250537	16.5088	-0.445267	-0.194781
16.7613	-0.381203	-0.240258	16.5884	-0.303903	-0.366603	16.6576	-0.379585	-0.251735	16.5852	-0.45315	-0.239559
16.7835	-0.405748	-0.239384	16.6076	-0.338803	-0.371514	16.6646	-0.359821	-0.245925	16.6674	-0.346866	-0.258168
16.7727	-0.304888	-0.220551	16.6055	-0.302904	-0.365241	16.6886	-0.387404	-0.251456	16.752	-0.157973	-0.260197
16.7764	-0.278665	-0.218503	16.623	-0.357782	-0.375702	16.6926	-0.374365	-0.247591	16.8211	-0.110786	-0.234945
16.7975	-0.342564	-0.230546	16.6366	-0.336351	-0.36526	16.6986	-0.383855	-0.252	16.8586	-0.136327	-0.192501
16.807	-0.354336	-0.223927	16.652	-0.346619	-0.372388	16.7033	-0.363012	-0.249543	16.8583	-0.157944	-0.200244
16.8264	-0.399685	-0.23175	16.6562	-0.335658	-0.366919	16.7233	-0.391828	-0.251763	16.8192	-0.29268	-0.268121
16.8266	-0.326035	-0.226752	16.6619	-0.324942	-0.371961	16.7146	-0.323548	-0.245565	16.7258	-0.220116	-0.26878
16.8395	-0.347807	-0.229078	16.6585	-0.277131	-0.362524	16.72	-0.326878	-0.248611	16.6681	-0.354484	-0.255113
16.8516	-0.36132	-0.22521	16.6643	-0.268051	-0.370692	16.7187	-0.316059	-0.257137	16.6069	-0.475068	-0.236595
16.8528	-0.316175	-0.229588	16.6723	-0.246424	-0.36057	16.7238	-0.321365	-0.26597	16.5841	-0.37782	-0.199816
16.8555	-0.280207	-0.223066	16.685	-0.249585	-0.364598	16.728	-0.340765	-0.268128	16.5839	-0.351003	-0.17056
16.8714	-0.334458	-0.229852	16.6944	-0.270051	-0.365344	16.7452	-0.331526	-0.258477	16.5998	-0.295916	-0.14284
16.8926	-0.37813	-0.230813	16.7059	-0.261751	-0.368369	16.761	-0.351629	-0.263604	16.6037	-0.416856	-0.181675
16.8982	-0.356046	-0.224057	16.7248	-0.292636	-0.364302	16.7815	-0.37684	-0.269942	16.7417	-0.74737	-0.258272
16.9115	-0.377268	-0.228882	16.7463	-0.34689	-0.370469	16.7883	-0.308202	-0.248672	16.83	-0.464566	-0.292885
16.9067	-0.314982	-0.224233	16.7536	-0.32927	-0.367786	16.8044	-0.315215	-0.244057	16.9019	-0.212655	-0.263996
16.9235	-0.321858	-0.220481	16.7605	-0.341697	-0.371674	16.827	-0.333175	-0.238555	16.9726	-0.192561	-0.222782
16.947	-0.363106	-0.221259	16.7627	-0.325538	-0.366359	16.8472	-0.367405	-0.246253	16.9962	-0.191366	-0.197728
16.9456	-0.33707	-0.222974	16.771	-0.359715	-0.382639	16.8559	-0.378712	-0.246621	17.0349	-0.285161	-0.208853
16.9413	-0.317706	-0.213907	16.7974	-0.401342	-0.391885	16.8687	-0.391898	-0.247058	17.01	-0.353206	-0.245233
16.9412	-0.29097	-0.212427	16.8164	-0.406223	-0.393765	16.8759	-0.414913	-0.250469	16.9358	-0.2595	-0.274465
16.9433	-0.261828	-0.203422	16.8246	-0.419154	-0.394505	16.881	-0.424449	-0.247691	16.863	-0.299347	-0.276206
16.957	-0.286148	-0.202658	16.8305	-0.391141	-0.391337	16.8871	-0.435167	-0.25397	16.7642	-0.368998	-0.246525
16.973	-0.277721	-0.205801	16.8444	-0.392547	-0.390223	16.8942	-0.413744	-0.258797	16.7316	-0.43359	-0.225612
16.9847	-0.271055	-0.199626	16.8567	-0.39025	-0.389669	16.8931	-0.353864	-0.248052	16.7257	-0.381472	-0.182999
17.0053	-0.336294	-0.217397	16.8543	-0.361023	-0.38011	16.9007	-0.356219	-0.247239	16.7408	-0.349637	-0.177891
17.0161	-0.352269	-0.227464	16.8789	-0.3827	-0.384249	16.9122	-0.351905	-0.247155	16.8367	-0.697291	-0.234131
17.0164	-0.314464	-0.211945	16.8913	-0.364399	-0.379409	16.9246	-0.351892	-0.242805	16.9387	-0.771865	-0.29054
17.0215	-0.316136	-0.204284	16.899	-0.38264	-0.386768	16.9344	-0.354058	-0.247218	16.9699	-0.461504	-0.299708
17.0397	-0.343743	-0.203641	16.9072	-0.378804	-0.387826	16.9526	-0.39059	-0.246326	17.028	-0.233584	-0.268052
17.0558	-0.375998	-0.207059	16.9223	-0.402593	-0.391989	16.9701	-0.429866	-0.25186	17.0777	-0.009258	-0.206602
17.0605	-0.359172	-0.204258	16.9262	-0.374899	-0.387824	16.9742	-0.421325	-0.248481	17.1155	-0.115036	-0.195172
17.065	-0.360834	-0.207084	16.9442	-0.39186	-0.392277	16.9882	-0.417321	-0.250053	17.1646	-0.228052	-0.188661
17.0703	-0.336491	-0.203803	16.9501	-0.390566	-0.390254	16.9947	-0.39544	-0.24002	17.1296	-0.247894	-0.216945
17.0757	-0.343654	-0.208576	16.964	-0.40312	-0.381045	17.0105	-0.412642	-0.248866	17.0191	-0.11434	-0.248844
17.0838	-0.347012	-0.192532	16.9701	-0.403444	-0.372497	17.0125	-0.420998	-0.248839	16.9246	-0.184603	-0.257028
17.0937	-0.358053	-0.183188	16.9764	-0.408629	-0.373172	17.0115	-0.418737	-0.249232	16.8355	-0.248113	-0.234606
17.1078	-0.334455	-0.175634	16.9728	-0.324303	-0.362037	17.0086	-0.374755	-0.247869	16.839	-0.371001	-0.201925
17.1228	-0.376578	-0.189795	16.9829	-0.290654	-0.356702	17.007	-0.340096	-0.243297	16.7756	-0.128512	-0.126949
17.1268	-0.334648	-0.190028	17.0011	-0.334184	-0.362139	NaN	NaN	NaN	NaN	NaN	NaN
17.1339	-0.340362	-0.185016	17.0195	-0.390089	-0.370844	NaN	NaN	NaN	NaN	NaN	NaN
17.1178	-0.262586	-0.170991	17.0265	-0.388065	-0.367475	NaN	NaN	NaN	NaN	NaN	NaN
17.1331	-0.308377	-0.174116	17.0384	-0.390173	-0.369553	NaN	NaN	NaN	NaN	NaN	NaN
17.1483	-0.344146	-0.183199	17.0463	-0.392643	-0.369199	NaN	NaN	NaN	NaN	NaN	NaN
17.1707	-0.360781	-0.192913	17.0504	-0.347047	-0.357967	NaN	NaN	NaN	NaN	NaN	NaN
17.1813	-0.365663	-0.191839	17.0585	-0.335192	-0.351498	NaN	NaN	NaN	NaN	NaN	NaN
17.194	-0.340163	-0.181279	17.0622	-0.310158	-0.346314	NaN	NaN	NaN	NaN	NaN	NaN
17.1948	-0.335585	-0.181838	17.0656	-0.306906	-0.343409	NaN	NaN	NaN	NaN	NaN	NaN
17.2117	-0.351954	-0.185284	17.0826	-0.330921	-0.346563	NaN	NaN	NaN	NaN	NaN	NaN
17.2165	-0.336412	-0.180513	17.079	-0.30573	-0.345528	NaN	NaN	NaN	NaN	NaN	NaN
17.2253	-0.343769	-0.183808	17.0878	-0.293102	-0.342794	NaN	NaN	NaN	NaN	NaN	NaN
17.2282	-0.340845	-0.185926	17.1019	-0.30882	-0.342404	NaN	NaN	NaN	NaN	NaN	NaN
17.236	-0.33409	-0.183225	17.1135	-0.307483	-0.346246	NaN	NaN	NaN	NaN	NaN	NaN
17.2324	-0.292306	-0.16969	17.1094	-0.304907	-0.344705	NaN	NaN	NaN	NaN	NaN	NaN
17.2255	-0.257821	-0.159039	17.1322	-0.355533	-0.346835	NaN	NaN	NaN	NaN	NaN	NaN
17.2362	-0.277934	-0.158578	17.1352	-0.354152	-0.337902	NaN	NaN	NaN	NaN	NaN	NaN
17.2572	-0.283667	-0.160337	17.1492	-0.333056	-0.333074	NaN	NaN	NaN	NaN	NaN	NaN
17.2598	-0.253204	-0.156098	17.1573	-0.357781	-0.337307	NaN	NaN	NaN	NaN	NaN	NaN
17.2682	-0.27253	-0.158036	17.1738	-0.406643	-0.348684	NaN	NaN	NaN	NaN	NaN	NaN
17.2764	-0.259124	-0.159629	17.1714	-0.379702	-0.338987	NaN	NaN	NaN	NaN	NaN	NaN
17.2921	-0.246434	-0.154874	17.1801	-0.357213	-0.338843	NaN	NaN	NaN	NaN	NaN	NaN
17.2968	-0.24659	-0.161109	17.1969	-0.399043	-0.350232	NaN	NaN	NaN	NaN	NaN	NaN
17.3127	-0.275217	-0.140229	17.1839	-0.326426	-0.330308	NaN	NaN	NaN	NaN	NaN	NaN
17.3222	-0.293134	-0.144894	17.1824	-0.255323	-0.312026	NaN	NaN	NaN	NaN	NaN	NaN
17.3234	-0.267732	-0.141073	17.1891	-0.253928	-0.306025	NaN	NaN	NaN	NaN	NaN	NaN
17.341	-0.300657	-0.141229	17.1875	-0.231615	-0.299435	NaN	NaN	NaN	NaN	NaN	NaN
17.3421	-0.259643	-0.137327	17.2034	-0.266345	-0.311509	NaN	NaN	NaN	NaN	NaN	NaN
17.3695	-0.332011	-0.142475	17.2281	-0.345038	-0.317546	NaN	NaN	NaN	NaN	NaN	NaN
17.3758	-0.328237	-0.139431	17.243	-0.348805	-0.298834	NaN	NaN	NaN	NaN	NaN	NaN
17.381	-0.31724	-0.129962	17.2553	-0.381242	-0.301247	NaN	NaN	NaN	NaN	NaN	NaN
17.3868	-0.28492	-0.119941	17.257	-0.343415	-0.305187	NaN	NaN	NaN	NaN	NaN	NaN
17.3863	-0.233553	-0.114217	17.243	-0.269668	-0.280611	NaN	NaN	NaN	NaN	NaN	NaN
17.39	-0.205082	-0.112074	17.246	-0.282525	-0.279591	NaN	NaN	NaN	NaN	NaN	NaN
17.4017	-0.202488	-0.114709	17.2509	-0.30466	-0.282748	NaN	NaN	NaN	NaN	NaN	NaN
17.4006	-0.179188	-0.11473	17.2869	-0.353179	-0.28724	NaN	NaN	NaN	NaN	NaN	NaN
17.4161	-0.244547	-0.116597	17.311	-0.37493	-0.284561	NaN	NaN	NaN	NaN	NaN	NaN
17.4185	-0.267145	-0.118609	17.3018	-0.346124	-0.272908	NaN	NaN	NaN	NaN	NaN	NaN
17.4205	-0.243445	-0.118996	17.2814	-0.286151	-0.260619	NaN	NaN	NaN	NaN	NaN	NaN
17.4272	-0.261823	-0.119252	17.298	-0.288478	-0.257329	NaN	NaN	NaN	NaN	NaN	NaN
17.4464	-0.281193	-0.114997	17.3186	-0.26288	-0.247146	NaN	NaN	NaN	NaN	NaN	NaN
17.4873	-0.370902	-0.126317	17.3265	-0.243841	-0.23924	NaN	NaN	NaN	NaN	NaN	NaN
17.5015	-0.341238	-0.10939	17.3201	-0.23716	-0.239106	NaN	NaN	NaN	NaN	NaN	NaN
17.494	-0.304847	-0.098991	17.3378	-0.279122	-0.240969	NaN	NaN	NaN	NaN	NaN	NaN
17.508	-0.329381	-0.096282	17.3516	-0.330147	-0.243188	NaN	NaN	NaN	NaN	NaN	NaN
17.5032	-0.289151	-0.100751	17.3522	-0.319877	-0.241809	NaN	NaN	NaN	NaN	NaN	NaN
17.5199	-0.33257	-0.100844	17.3485	-0.275049	-0.230459	NaN	NaN	NaN	NaN	NaN	NaN
17.5268	-0.316646	-0.096534	17.3466	-0.239486	-0.221005	NaN	NaN	NaN	NaN	NaN	NaN
17.5409	-0.34305	-0.098835	17.3449	-0.228208	-0.215052	NaN	NaN	NaN	NaN	NaN	NaN
17.5428	-0.319478	-0.09908	17.3551	-0.223566	-0.215231	NaN	NaN	NaN	NaN	NaN	NaN
17.5477	-0.310916	-0.091998	17.3678	-0.244328	-0.220528	NaN	NaN	NaN	NaN	NaN	NaN
17.5554	-0.328396	-0.100119	17.3679	-0.241967	-0.221766	NaN	NaN	NaN	NaN	NaN	NaN
17.5524	-0.261256	-0.079216	17.3741	-0.220121	-0.214556	NaN	NaN	NaN	NaN	NaN	NaN
17.5618	-0.277216	-0.081421	17.384	-0.234948	-0.216719	NaN	NaN	NaN	NaN	NaN	NaN
17.5618	-0.252779	-0.062752	17.4158	-0.272004	-0.219788	NaN	NaN	NaN	NaN	NaN	NaN
17.5705	-0.269956	-0.058449	17.4266	-0.257068	-0.208832	NaN	NaN	NaN	NaN	NaN	NaN
17.5758	-0.269217	-0.053971	17.4202	-0.238319	-0.19557	NaN	NaN	NaN	NaN	NaN	NaN
17.5656	-0.193771	-0.052997	17.4238	-0.197102	-0.182673	NaN	NaN	NaN	NaN	NaN	NaN
17.5746	-0.170703	-0.053697	17.4232	-0.156718	-0.172402	NaN	NaN	NaN	NaN	NaN	NaN
17.5823	-0.158527	-0.0453	17.4342	-0.172409	-0.174548	NaN	NaN	NaN	NaN	NaN	NaN
17.6136	-0.235335	-0.05618	17.4417	-0.165751	-0.174323	NaN	NaN	NaN	NaN	NaN	NaN
17.6282	-0.264042	-0.051514	17.4456	-0.177857	-0.176513	NaN	NaN	NaN	NaN	NaN	NaN
17.616	-0.178266	-0.03142	17.4462	-0.20633	-0.178182	NaN	NaN	NaN	NaN	NaN	NaN
17.6384	-0.262312	-0.035268	17.4365	-0.143961	-0.164592	NaN	NaN	NaN	NaN	NaN	NaN
17.6353	-0.227162	-0.025375	17.4535	-0.165308	-0.155604	NaN	NaN	NaN	NaN	NaN	NaN
17.6531	-0.256114	-0.038179	17.4618	-0.141347	-0.151404	NaN	NaN	NaN	NaN	NaN	NaN
17.6611	-0.274082	-0.03635	17.4829	-0.168362	-0.150451	NaN	NaN	NaN	NaN	NaN	NaN
17.6776	-0.28188	-0.031376	17.4967	-0.224242	-0.154614	NaN	NaN	NaN	NaN	NaN	NaN
17.7096	-0.380216	-0.040222	17.4975	-0.231183	-0.153772	NaN	NaN	NaN	NaN	NaN	NaN
17.7249	-0.390932	-0.02836	17.4972	-0.200587	-0.143384	NaN	NaN	NaN	NaN	NaN	NaN
17.7067	-0.297162	-0.013923	17.4912	-0.15852	-0.129836	NaN	NaN	NaN	NaN	NaN	NaN
17.7174	-0.315724	-0.013147	17.5023	-0.17307	-0.134949	NaN	NaN	NaN	NaN	NaN	NaN
17.726	-0.34844	-0.018844	17.5302	-0.240895	-0.134553	NaN	NaN	NaN	NaN	NaN	NaN
17.7233	-0.311697	-0.01047	17.5275	-0.234931	-0.134189	NaN	NaN	NaN	NaN	NaN	NaN
17.7187	-0.275819	-0.0087	17.5179	-0.182979	-0.114898	NaN	NaN	NaN	NaN	NaN	NaN
17.7103	-0.232847	-0.006245	17.5405	-0.200589	-0.113763	NaN	NaN	NaN	NaN	NaN	NaN
17.7068	-0.212392	-0.003131	17.5607	-0.215094	-0.113214	NaN	NaN	NaN	NaN	NaN	NaN
17.7375	-0.239597	0.014354	17.5704	-0.246565	-0.115175	NaN	NaN	NaN	NaN	NaN	NaN
17.7588	-0.244083	0.013521	17.5809	-0.209765	-0.104402	NaN	NaN	NaN	NaN	NaN	NaN
17.7794	-0.241384	0.015961	17.5733	-0.136722	-0.081117	NaN	NaN	NaN	NaN	NaN	NaN
17.7775	-0.20431	0.030635	17.5622	-0.102182	-0.068279	NaN	NaN	NaN	NaN	NaN	NaN
17.7847	-0.207411	0.0303	17.5952	-0.193855	-0.085211	NaN	NaN	NaN	NaN	NaN	NaN
17.7795	-0.178271	0.03073	17.613	-0.246056	-0.094647	NaN	NaN	NaN	NaN	NaN	NaN
17.7783	-0.192914	0.029874	17.6016	-0.181487	-0.073255	NaN	NaN	NaN	NaN	NaN	NaN
17.7943	-0.201018	0.027538	17.6109	-0.221319	-0.072578	NaN	NaN	NaN	NaN	NaN	NaN
17.7981	-0.181942	0.041738	17.625	-0.254844	-0.078001	NaN	NaN	NaN	NaN	NaN	NaN
17.8101	-0.192083	0.059105	17.6274	-0.248242	-0.0743	NaN	NaN	NaN	NaN	NaN	NaN
17.8213	-0.163611	0.073849	17.6422	-0.268956	-0.07767	NaN	NaN	NaN	NaN	NaN	NaN
17.8427	-0.225619	0.056493	17.6502	-0.243118	-0.065839	NaN	NaN	NaN	NaN	NaN	NaN
17.8496	-0.219225	0.065061	17.6534	-0.198724	-0.053484	NaN	NaN	NaN	NaN	NaN	NaN
17.8466	-0.192779	0.063511	17.6549	-0.20951	-0.053429	NaN	NaN	NaN	NaN	NaN	NaN
17.8551	-0.189977	0.069806	17.6663	-0.146141	-0.040819	NaN	NaN	NaN	NaN	NaN	NaN
17.8635	-0.194165	0.069945	17.6619	-0.092908	-0.025647	NaN	NaN	NaN	NaN	NaN	NaN
17.8812	-0.233972	0.068459	17.6784	-0.147472	-0.029907	NaN	NaN	NaN	NaN	NaN	NaN
17.8979	-0.271567	0.069225	17.6927	-0.187566	-0.033812	NaN	NaN	NaN	NaN	NaN	NaN
17.9038	-0.249389	0.072573	17.6903	-0.149529	-0.024765	NaN	NaN	NaN	NaN	NaN	NaN
17.8974	-0.219407	0.086182	17.7181	-0.228903	-0.032659	NaN	NaN	NaN	NaN	NaN	NaN
17.8974	-0.210505	0.086067	17.7243	-0.220806	-0.021562	NaN	NaN	NaN	NaN	NaN	NaN
17.9048	-0.193595	0.088412	17.7142	-0.163254	-0.009092	NaN	NaN	NaN	NaN	NaN	NaN
17.9178	-0.206423	0.091476	17.7287	-0.196513	-0.01126	NaN	NaN	NaN	NaN	NaN	NaN
17.9237	-0.21439	0.0887	17.7304	-0.189531	-0.010656	NaN	NaN	NaN	NaN	NaN	NaN
17.9184	-0.18657	0.08788	17.7334	-0.16948	0.000888	NaN	NaN	NaN	NaN	NaN	NaN
17.9245	-0.160349	0.099793	17.7254	-0.109621	0.010302	NaN	NaN	NaN	NaN	NaN	NaN
17.9337	-0.148649	0.112219	17.7257	-0.10407	0.011228	NaN	NaN	NaN	NaN	NaN	NaN
17.9489	-0.146488	0.116338	17.763	-0.194131	0.007382	NaN	NaN	NaN	NaN	NaN	NaN
17.9729	-0.175323	0.11605	17.7684	-0.180766	0.010969	NaN	NaN	NaN	NaN	NaN	NaN
17.9925	-0.208958	0.111048	17.7731	-0.205482	0.004225	NaN	NaN	NaN	NaN	NaN	NaN
18.0123	-0.248424	0.107533	17.7883	-0.190452	0.018224	NaN	NaN	NaN	NaN	NaN	NaN
18.0047	-0.233479	0.120821	17.7977	-0.183251	0.029902	NaN	NaN	NaN	NaN	NaN	NaN
18.0076	-0.208415	0.131409	17.8089	-0.193435	0.032042	NaN	NaN	NaN	NaN	NaN	NaN
18.0046	-0.173592	0.130318	17.8122	-0.218317	0.028139	NaN	NaN	NaN	NaN	NaN	NaN
18.0194	-0.185274	0.133207	17.8136	-0.160375	0.038639	NaN	NaN	NaN	NaN	NaN	NaN
18.0324	-0.193281	0.13494	17.8077	-0.111632	0.052652	NaN	NaN	NaN	NaN	NaN	NaN
18.0366	-0.186665	0.133728	17.8207	-0.094645	0.05785	NaN	NaN	NaN	NaN	NaN	NaN
18.0253	-0.15062	0.140421	17.8334	-0.110505	0.052358	NaN	NaN	NaN	NaN	NaN	NaN
18.0367	-0.155068	0.151498	17.8341	-0.113375	0.051104	NaN	NaN	NaN	NaN	NaN	NaN
18.0369	-0.13142	0.151119	17.8331	-0.086755	0.060375	NaN	NaN	NaN	NaN	NaN	NaN
18.0564	-0.173656	0.151222	17.8395	-0.077934	0.063435	NaN	NaN	NaN	NaN	NaN	NaN
18.0832	-0.211829	0.151044	17.8335	-0.040759	0.076168	NaN	NaN	NaN	NaN	NaN	NaN
18.0857	-0.147575	0.15614	17.8466	-0.053985	0.089477	NaN	NaN	NaN	NaN	NaN	NaN
18.1033	-0.163261	0.162264	17.871	-0.107389	0.079565	NaN	NaN	NaN	NaN	NaN	NaN
18.0859	-0.072483	0.1782	17.892	-0.145171	0.071837	NaN	NaN	NaN	NaN	NaN	NaN
18.1044	-0.11666	0.178193	17.8945	-0.117549	0.076492	NaN	NaN	NaN	NaN	NaN	NaN
18.1207	-0.154187	0.175807	17.8952	-0.069562	0.084699	NaN	NaN	NaN	NaN	NaN	NaN
18.121	-0.160543	0.170725	17.8837	-0.035053	0.09606	NaN	NaN	NaN	NaN	NaN	NaN
18.1132	-0.125079	0.173863	17.9115	-0.118434	0.091819	NaN	NaN	NaN	NaN	NaN	NaN
18.1289	-0.16005	0.171588	17.9146	-0.124067	0.092802	NaN	NaN	NaN	NaN	NaN	NaN
18.146	-0.192406	0.171429	17.9241	-0.123018	0.091544	NaN	NaN	NaN	NaN	NaN	NaN
18.1498	-0.185622	0.172363	17.927	-0.111169	0.091919	NaN	NaN	NaN	NaN	NaN	NaN
18.1601	-0.202258	0.168758	17.9563	-0.148624	0.092061	NaN	NaN	NaN	NaN	NaN	NaN
18.1694	-0.158103	0.182303	17.9634	-0.144169	0.104062	NaN	NaN	NaN	NaN	NaN	NaN
18.1819	-0.132663	0.19494	17.97	-0.124508	0.114922	NaN	NaN	NaN	NaN	NaN	NaN
18.1884	-0.103397	0.200805	17.9817	-0.106554	0.124383	NaN	NaN	NaN	NaN	NaN	NaN
18.1985	-0.12184	0.193248	17.9737	-0.047844	0.136888	NaN	NaN	NaN	NaN	NaN	NaN
18.199	-0.131004	0.19373	17.9849	-0.056746	0.135487	NaN	NaN	NaN	NaN	NaN	NaN
18.2015	-0.123392	0.204315	17.9786	-0.039856	0.135784	NaN	NaN	NaN	NaN	NaN	NaN
18.2072	-0.127772	0.214329	17.9839	-0.060694	0.134025	NaN	NaN	NaN	NaN	NaN	NaN
18.2158	-0.128794	0.212832	17.9802	-0.035364	0.133598	NaN	NaN	NaN	NaN	NaN	NaN
18.2259	-0.130296	0.215198	18.0109	-0.083152	0.134092	NaN	NaN	NaN	NaN	NaN	NaN
18.2521	-0.123702	0.213789	18.0207	-0.114046	0.13447	NaN	NaN	NaN	NaN	NaN	NaN
18.2622	-0.140363	0.204866	18.033	-0.127887	0.132065	NaN	NaN	NaN	NaN	NaN	NaN
18.2717	-0.136212	0.211624	18.0345	-0.105677	0.134046	NaN	NaN	NaN	NaN	NaN	NaN
18.2587	-0.090686	0.223946	18.0446	-0.121071	0.133146	NaN	NaN	NaN	NaN	NaN	NaN
18.2597	-0.079119	0.236206	18.0488	-0.07466	0.146573	NaN	NaN	NaN	NaN	NaN	NaN
18.2819	-0.103925	0.225512	18.0461	-0.0432	0.158093	NaN	NaN	NaN	NaN	NaN	NaN
18.2763	-0.073261	0.241297	18.0587	-0.057592	0.154654	NaN	NaN	NaN	NaN	NaN	NaN
18.2936	-0.121768	0.233649	18.0513	-0.003944	0.167225	NaN	NaN	NaN	NaN	NaN	NaN
18.2951	-0.094495	0.244359	18.0726	-0.020106	0.1743	NaN	NaN	NaN	NaN	NaN	NaN
18.3016	-0.055259	0.250566	18.0824	-0.049175	0.178438	NaN	NaN	NaN	NaN	NaN	NaN
18.32	-0.077551	0.249135	18.1046	-0.094956	0.161712	NaN	NaN	NaN	NaN	NaN	NaN
18.3299	-0.062986	0.255778	18.1173	-0.10711	0.154203	NaN	NaN	NaN	NaN	NaN	NaN
18.3422	-0.05098	0.261221	18.1395	-0.141525	0.151903	NaN	NaN	NaN	NaN	NaN	NaN
18.36	-0.098689	0.245703	18.1308	-0.076585	0.165564	NaN	NaN	NaN	NaN	NaN	NaN
18.3581	-0.118384	0.237821	18.1301	-0.042459	0.176079	NaN	NaN	NaN	NaN	NaN	NaN
18.3533	-0.115453	0.244872	18.1456	-0.056832	0.180816	NaN	NaN	NaN	NaN	NaN	NaN
18.3392	-0.052871	0.255407	18.1616	-0.065047	0.173855	NaN	NaN	NaN	NaN	NaN	NaN
18.3534	-0.050486	0.256548	18.1657	-0.027949	0.182155	NaN	NaN	NaN	NaN	NaN	NaN
18.3933	-0.119973	0.257047	18.1789	-0.036523	0.177945	NaN	NaN	NaN	NaN	NaN	NaN
18.4043	-0.130979	0.260074	18.1857	-0.028981	0.181254	NaN	NaN	NaN	NaN	NaN	NaN
18.4107	-0.126219	0.250586	18.1946	-0.038097	0.173329	NaN	NaN	NaN	NaN	NaN	NaN
18.409	-0.090767	0.265427	18.2001	-0.088312	0.171836	NaN	NaN	NaN	NaN	NaN	NaN
18.4279	-0.136176	0.260068	18.2106	-0.097553	0.177878	NaN	NaN	NaN	NaN	NaN	NaN
18.4495	-0.210201	0.250721	18.2188	-0.104482	0.180591	NaN	NaN	NaN	NaN	NaN	NaN
18.4467	-0.148543	0.264276	18.2279	-0.115957	0.172709	NaN	NaN	NaN	NaN	NaN	NaN
18.4548	-0.138426	0.277493	18.2436	-0.141304	0.174546	NaN	NaN	NaN	NaN	NaN	NaN
18.4594	-0.107738	0.280811	18.2321	-0.077501	0.184935	NaN	NaN	NaN	NaN	NaN	NaN
18.449	-0.073589	0.286126	18.2382	-0.022367	0.198683	NaN	NaN	NaN	NaN	NaN	NaN
18.4378	-0.013468	0.296616	18.2536	-0.026624	0.201465	NaN	NaN	NaN	NaN	NaN	NaN
18.4375	0.028924	0.298295	18.2667	-0.037338	0.196463	NaN	NaN	NaN	NaN	NaN	NaN
18.4687	-0.024913	0.299694	18.2685	-0.03729	0.201074	NaN	NaN	NaN	NaN	NaN	NaN
18.4934	-0.048873	0.302485	18.2889	-0.06325	0.197615	NaN	NaN	NaN	NaN	NaN	NaN
18.504	-0.039603	0.298759	18.2945	-0.043386	0.195951	NaN	NaN	NaN	NaN	NaN	NaN
18.5028	-0.041239	0.299813	18.3014	-0.029042	0.200227	NaN	NaN	NaN	NaN	NaN	NaN
18.512	-0.084618	0.296974	18.3036	-0.00774	0.206602	NaN	NaN	NaN	NaN	NaN	NaN
18.5303	-0.135826	0.295758	18.3026	0.001061	0.209822	NaN	NaN	NaN	NaN	NaN	NaN
18.531	-0.114236	0.298075	18.312	-0.013562	0.216231	NaN	NaN	NaN	NaN	NaN	NaN
18.4956	-0.054661	0.317034	18.3239	-0.035155	0.217711	NaN	NaN	NaN	NaN	NaN	NaN
18.5021	-0.054076	0.317215	18.317	-0.043937	0.217655	NaN	NaN	NaN	NaN	NaN	NaN
18.5007	-0.05671	0.318075	18.32	-0.04004	0.218256	NaN	NaN	NaN	NaN	NaN	NaN
18.4936	-0.002216	0.333925	18.321	-0.023383	0.219928	NaN	NaN	NaN	NaN	NaN	NaN
18.4999	-0.055093	0.339821	18.3335	-0.029995	0.20909	NaN	NaN	NaN	NaN	NaN	NaN
18.51	-0.108015	0.337735	18.3356	-0.034517	0.215302	NaN	NaN	NaN	NaN	NaN	NaN
18.4975	-0.085973	0.347316	18.3355	-0.035406	0.21805	NaN	NaN	NaN	NaN	NaN	NaN
18.498	-0.068542	0.357135	18.3337	0.006829	0.218724	NaN	NaN	NaN	NaN	NaN	NaN
18.4785	-0.022289	0.369976	18.3472	0.027808	0.211718	NaN	NaN	NaN	NaN	NaN	NaN
18.4858	-0.06499	0.377969	18.3437	0.002909	0.204097	NaN	NaN	NaN	NaN	NaN	NaN
18.488	-0.074133	0.377916	18.354	-0.020788	0.196744	NaN	NaN	NaN	NaN	NaN	NaN
18.4797	-0.066106	0.376963	18.3482	0.025107	0.200164	NaN	NaN	NaN	NaN	NaN	NaN
18.4765	-0.069271	0.376472	18.3495	0.018748	0.208914	NaN	NaN	NaN	NaN	NaN	NaN
18.4702	-0.066805	0.377743	18.355	0.025712	0.211346	NaN	NaN	NaN	NaN	NaN	NaN
18.4617	-0.061344	0.378684	18.353	0.057178	0.220984	NaN	NaN	NaN	NaN	NaN	NaN
18.4597	-0.050367	0.379887	18.358	0.020799	0.209844	NaN	NaN	NaN	NaN	NaN	NaN
18.4657	-0.064175	0.379376	18.3585	0.03981	0.215527	NaN	NaN	NaN	NaN	NaN	NaN
18.4748	-0.105747	0.376808	18.3447	0.097416	0.223017	NaN	NaN	NaN	NaN	NaN	NaN
NaN	NaN	NaN	NaN	NaN	NaN	NaN	NaN	NaN	NaN	NaN	NaN
NaN	NaN	NaN	NaN	NaN	NaN	NaN	NaN	NaN	NaN	NaN	NaN
NaN	NaN	NaN	NaN	NaN	NaN	NaN	NaN	NaN	NaN	NaN	NaN
NaN	NaN	NaN	NaN	NaN	NaN	NaN	NaN	NaN	NaN	NaN	NaN
NaN	NaN	NaN	NaN	NaN	NaN	NaN	NaN	NaN	NaN	NaN	NaN
NaN	NaN	NaN	NaN	NaN	NaN	NaN	NaN	NaN	NaN	NaN	NaN
NaN	NaN	NaN	NaN	NaN	NaN	NaN	NaN	NaN	NaN	NaN	NaN
NaN	NaN	NaN	NaN	NaN	NaN	NaN	NaN	NaN	NaN	NaN	NaN
NaN	NaN	NaN	NaN	NaN	NaN	NaN	NaN	NaN	NaN	NaN	NaN
NaN	NaN	NaN	NaN	NaN	NaN	NaN	NaN	NaN	NaN	NaN	NaN
NaN	NaN	NaN	NaN	NaN	NaN	NaN	NaN	NaN	NaN	NaN	NaN
NaN	NaN	NaN	NaN	NaN	NaN	NaN	NaN	NaN	NaN	NaN	NaN
NaN	NaN	NaN	NaN	NaN	NaN	NaN	NaN	NaN	NaN	NaN	NaN
NaN	NaN	NaN	NaN	NaN	NaN	NaN	NaN	NaN	NaN	NaN	NaN
NaN	NaN	NaN	NaN	NaN	NaN	NaN	NaN	NaN	NaN	NaN	NaN
NaN	NaN	NaN	NaN	NaN	NaN	NaN	NaN	NaN	NaN	NaN	NaN
NaN	NaN	NaN	NaN	NaN	NaN	NaN	NaN	NaN	NaN	NaN	NaN
NaN	NaN	NaN	NaN	NaN	NaN	NaN	NaN	NaN	NaN	NaN	NaN
NaN	NaN	NaN	NaN	NaN	NaN	NaN	NaN	NaN	NaN	NaN	NaN
NaN	NaN	NaN	NaN	NaN	NaN	NaN	NaN	NaN	NaN	NaN	NaN
NaN	NaN	NaN	NaN	NaN	NaN	NaN	NaN	NaN	NaN	NaN	NaN
NaN	NaN	NaN	NaN	NaN	NaN	NaN	NaN	NaN	NaN	NaN	NaN
NaN	NaN	NaN	NaN	NaN	NaN	NaN	NaN	NaN	NaN	NaN	NaN
NaN	NaN	NaN	NaN	NaN	NaN	NaN	NaN	NaN	NaN	NaN	NaN
NaN	NaN	NaN	NaN	NaN	NaN	NaN	NaN	NaN	NaN	NaN	NaN
NaN	NaN	NaN	NaN	NaN	NaN	NaN	NaN	NaN	NaN	NaN	NaN
NaN	NaN	NaN	NaN	NaN	NaN	NaN	NaN	NaN	NaN	NaN	NaN
NaN	NaN	NaN	NaN	NaN	NaN	NaN	NaN	NaN	NaN	NaN	NaN
NaN	NaN	NaN	NaN	NaN	NaN	NaN	NaN	NaN	NaN	NaN	NaN
[truncated: 95 more rows]

## Sheet: Control_afterConvection_Ind30_xyzpts
pt1_X	pt1_Y	pt1_Z	pt2_X	pt2_Y	pt2_Z	pt3_X	pt3_Y	pt3_Z	pt4_X	pt4_Y	pt4_Z
NaN	NaN	NaN	NaN	NaN	NaN	NaN	NaN	NaN	NaN	NaN	NaN
NaN	NaN	NaN	NaN	NaN	NaN	NaN	NaN	NaN	NaN	NaN	NaN
NaN	NaN	NaN	NaN	NaN	NaN	NaN	NaN	NaN	NaN	NaN	NaN
NaN	NaN	NaN	NaN	NaN	NaN	NaN	NaN	NaN	NaN	NaN	NaN
NaN	NaN	NaN	NaN	NaN	NaN	NaN	NaN	NaN	NaN	NaN	NaN
NaN	NaN	NaN	NaN	NaN	NaN	NaN	NaN	NaN	NaN	NaN	NaN
NaN	NaN	NaN	NaN	NaN	NaN	NaN	NaN	NaN	NaN	NaN	NaN
NaN	NaN	NaN	NaN	NaN	NaN	NaN	NaN	NaN	NaN	NaN	NaN
NaN	NaN	NaN	NaN	NaN	NaN	NaN	NaN	NaN	NaN	NaN	NaN
NaN	NaN	NaN	NaN	NaN	NaN	NaN	NaN	NaN	NaN	NaN	NaN
NaN	NaN	NaN	NaN	NaN	NaN	NaN	NaN	NaN	NaN	NaN	NaN
NaN	NaN	NaN	NaN	NaN	NaN	NaN	NaN	NaN	NaN	NaN	NaN
NaN	NaN	NaN	NaN	NaN	NaN	NaN	NaN	NaN	NaN	NaN	NaN
NaN	NaN	NaN	NaN	NaN	NaN	NaN	NaN	NaN	NaN	NaN	NaN
NaN	NaN	NaN	NaN	NaN	NaN	NaN	NaN	NaN	NaN	NaN	NaN
NaN	NaN	NaN	NaN	NaN	NaN	NaN	NaN	NaN	NaN	NaN	NaN
NaN	NaN	NaN	NaN	NaN	NaN	NaN	NaN	NaN	NaN	NaN	NaN
NaN	NaN	NaN	NaN	NaN	NaN	NaN	NaN	NaN	NaN	NaN	NaN
NaN	NaN	NaN	NaN	NaN	NaN	NaN	NaN	NaN	NaN	NaN	NaN
NaN	NaN	NaN	NaN	NaN	NaN	NaN	NaN	NaN	NaN	NaN	NaN
NaN	NaN	NaN	NaN	NaN	NaN	NaN	NaN	NaN	NaN	NaN	NaN
NaN	NaN	NaN	NaN	NaN	NaN	NaN	NaN	NaN	NaN	NaN	NaN
NaN	NaN	NaN	NaN	NaN	NaN	NaN	NaN	NaN	NaN	NaN	NaN
NaN	NaN	NaN	NaN	NaN	NaN	NaN	NaN	NaN	NaN	NaN	NaN
NaN	NaN	NaN	NaN	NaN	NaN	NaN	NaN	NaN	NaN	NaN	NaN
NaN	NaN	NaN	NaN	NaN	NaN	NaN	NaN	NaN	NaN	NaN	NaN
NaN	NaN	NaN	NaN	NaN	NaN	NaN	NaN	NaN	NaN	NaN	NaN
NaN	NaN	NaN	NaN	NaN	NaN	NaN	NaN	NaN	NaN	NaN	NaN
NaN	NaN	NaN	NaN	NaN	NaN	NaN	NaN	NaN	NaN	NaN	NaN
NaN	NaN	NaN	NaN	NaN	NaN	NaN	NaN	NaN	NaN	NaN	NaN
NaN	NaN	NaN	NaN	NaN	NaN	NaN	NaN	NaN	NaN	NaN	NaN
NaN	NaN	NaN	NaN	NaN	NaN	NaN	NaN	NaN	NaN	NaN	NaN
NaN	NaN	NaN	NaN	NaN	NaN	NaN	NaN	NaN	NaN	NaN	NaN
NaN	NaN	NaN	NaN	NaN	NaN	NaN	NaN	NaN	NaN	NaN	NaN
NaN	NaN	NaN	NaN	NaN	NaN	NaN	NaN	NaN	NaN	NaN	NaN
NaN	NaN	NaN	NaN	NaN	NaN	NaN	NaN	NaN	NaN	NaN	NaN
NaN	NaN	NaN	NaN	NaN	NaN	NaN	NaN	NaN	NaN	NaN	NaN
NaN	NaN	NaN	NaN	NaN	NaN	NaN	NaN	NaN	NaN	NaN	NaN
NaN	NaN	NaN	NaN	NaN	NaN	NaN	NaN	NaN	NaN	NaN	NaN
NaN	NaN	NaN	NaN	NaN	NaN	NaN	NaN	NaN	NaN	NaN	NaN
NaN	NaN	NaN	NaN	NaN	NaN	NaN	NaN	NaN	NaN	NaN	NaN
NaN	NaN	NaN	NaN	NaN	NaN	NaN	NaN	NaN	NaN	NaN	NaN
NaN	NaN	NaN	NaN	NaN	NaN	NaN	NaN	NaN	NaN	NaN	NaN
NaN	NaN	NaN	NaN	NaN	NaN	NaN	NaN	NaN	NaN	NaN	NaN
NaN	NaN	NaN	NaN	NaN	NaN	NaN	NaN	NaN	NaN	NaN	NaN
NaN	NaN	NaN	NaN	NaN	NaN	NaN	NaN	NaN	NaN	NaN	NaN
NaN	NaN	NaN	NaN	NaN	NaN	NaN	NaN	NaN	NaN	NaN	NaN
NaN	NaN	NaN	NaN	NaN	NaN	NaN	NaN	NaN	NaN	NaN	NaN
NaN	NaN	NaN	NaN	NaN	NaN	NaN	NaN	NaN	NaN	NaN	NaN
NaN	NaN	NaN	NaN	NaN	NaN	NaN	NaN	NaN	NaN	NaN	NaN
NaN	NaN	NaN	NaN	NaN	NaN	NaN	NaN	NaN	NaN	NaN	NaN
NaN	NaN	NaN	NaN	NaN	NaN	NaN	NaN	NaN	NaN	NaN	NaN
NaN	NaN	NaN	NaN	NaN	NaN	NaN	NaN	NaN	NaN	NaN	NaN
NaN	NaN	NaN	NaN	NaN	NaN	NaN	NaN	NaN	NaN	NaN	NaN
NaN	NaN	NaN	NaN	NaN	NaN	NaN	NaN	NaN	NaN	NaN	NaN
NaN	NaN	NaN	NaN	NaN	NaN	NaN	NaN	NaN	NaN	NaN	NaN
NaN	NaN	NaN	NaN	NaN	NaN	NaN	NaN	NaN	NaN	NaN	NaN
NaN	NaN	NaN	NaN	NaN	NaN	NaN	NaN	NaN	NaN	NaN	NaN
NaN	NaN	NaN	NaN	NaN	NaN	NaN	NaN	NaN	NaN	NaN	NaN
NaN	NaN	NaN	NaN	NaN	NaN	NaN	NaN	NaN	NaN	NaN	NaN
NaN	NaN	NaN	NaN	NaN	NaN	NaN	NaN	NaN	NaN	NaN	NaN
NaN	NaN	NaN	NaN	NaN	NaN	NaN	NaN	NaN	NaN	NaN	NaN
NaN	NaN	NaN	NaN	NaN	NaN	NaN	NaN	NaN	NaN	NaN	NaN
NaN	NaN	NaN	NaN	NaN	NaN	NaN	NaN	NaN	NaN	NaN	NaN
NaN	NaN	NaN	NaN	NaN	NaN	NaN	NaN	NaN	NaN	NaN	NaN
NaN	NaN	NaN	NaN	NaN	NaN	NaN	NaN	NaN	NaN	NaN	NaN
NaN	NaN	NaN	NaN	NaN	NaN	NaN	NaN	NaN	NaN	NaN	NaN
NaN	NaN	NaN	NaN	NaN	NaN	NaN	NaN	NaN	NaN	NaN	NaN
NaN	NaN	NaN	NaN	NaN	NaN	NaN	NaN	NaN	NaN	NaN	NaN
NaN	NaN	NaN	NaN	NaN	NaN	NaN	NaN	NaN	NaN	NaN	NaN
NaN	NaN	NaN	NaN	NaN	NaN	NaN	NaN	NaN	NaN	NaN	NaN
NaN	NaN	NaN	NaN	NaN	NaN	NaN	NaN	NaN	NaN	NaN	NaN
NaN	NaN	NaN	NaN	NaN	NaN	NaN	NaN	NaN	NaN	NaN	NaN
NaN	NaN	NaN	NaN	NaN	NaN	NaN	NaN	NaN	NaN	NaN	NaN
NaN	NaN	NaN	NaN	NaN	NaN	NaN	NaN	NaN	NaN	NaN	NaN
NaN	NaN	NaN	NaN	NaN	NaN	NaN	NaN	NaN	NaN	NaN	NaN
NaN	NaN	NaN	NaN	NaN	NaN	NaN	NaN	NaN	NaN	NaN	NaN
NaN	NaN	NaN	NaN	NaN	NaN	NaN	NaN	NaN	NaN	NaN	NaN
NaN	NaN	NaN	NaN	NaN	NaN	NaN	NaN	NaN	NaN	NaN	NaN
NaN	NaN	NaN	NaN	NaN	NaN	NaN	NaN	NaN	NaN	NaN	NaN
NaN	NaN	NaN	NaN	NaN	NaN	NaN	NaN	NaN	NaN	NaN	NaN
NaN	NaN	NaN	NaN	NaN	NaN	NaN	NaN	NaN	NaN	NaN	NaN
NaN	NaN	NaN	NaN	NaN	NaN	NaN	NaN	NaN	NaN	NaN	NaN
NaN	NaN	NaN	NaN	NaN	NaN	NaN	NaN	NaN	NaN	NaN	NaN
NaN	NaN	NaN	NaN	NaN	NaN	NaN	NaN	NaN	NaN	NaN	NaN
NaN	NaN	NaN	NaN	NaN	NaN	NaN	NaN	NaN	NaN	NaN	NaN
NaN	NaN	NaN	NaN	NaN	NaN	NaN	NaN	NaN	NaN	NaN	NaN
NaN	NaN	NaN	NaN	NaN	NaN	NaN	NaN	NaN	NaN	NaN	NaN
NaN	NaN	NaN	NaN	NaN	NaN	NaN	NaN	NaN	NaN	NaN	NaN
NaN	NaN	NaN	NaN	NaN	NaN	NaN	NaN	NaN	NaN	NaN	NaN
NaN	NaN	NaN	NaN	NaN	NaN	NaN	NaN	NaN	NaN	NaN	NaN
NaN	NaN	NaN	NaN	NaN	NaN	NaN	NaN	NaN	NaN	NaN	NaN
NaN	NaN	NaN	NaN	NaN	NaN	NaN	NaN	NaN	NaN	NaN	NaN
NaN	NaN	NaN	NaN	NaN	NaN	NaN	NaN	NaN	NaN	NaN	NaN
NaN	NaN	NaN	NaN	NaN	NaN	NaN	NaN	NaN	NaN	NaN	NaN
NaN	NaN	NaN	NaN	NaN	NaN	NaN	NaN	NaN	NaN	NaN	NaN
NaN	NaN	NaN	NaN	NaN	NaN	NaN	NaN	NaN	NaN	NaN	NaN
NaN	NaN	NaN	NaN	NaN	NaN	NaN	NaN	NaN	NaN	NaN	NaN
NaN	NaN	NaN	NaN	NaN	NaN	NaN	NaN	NaN	NaN	NaN	NaN
NaN	NaN	NaN	NaN	NaN	NaN	NaN	NaN	NaN	NaN	NaN	NaN
NaN	NaN	NaN	NaN	NaN	NaN	NaN	NaN	NaN	NaN	NaN	NaN
NaN	NaN	NaN	NaN	NaN	NaN	NaN	NaN	NaN	NaN	NaN	NaN
NaN	NaN	NaN	NaN	NaN	NaN	NaN	NaN	NaN	NaN	NaN	NaN
NaN	NaN	NaN	NaN	NaN	NaN	NaN	NaN	NaN	NaN	NaN	NaN
NaN	NaN	NaN	NaN	NaN	NaN	NaN	NaN	NaN	NaN	NaN	NaN
NaN	NaN	NaN	NaN	NaN	NaN	NaN	NaN	NaN	NaN	NaN	NaN
NaN	NaN	NaN	NaN	NaN	NaN	NaN	NaN	NaN	NaN	NaN	NaN
NaN	NaN	NaN	NaN	NaN	NaN	NaN	NaN	NaN	NaN	NaN	NaN
NaN	NaN	NaN	NaN	NaN	NaN	NaN	NaN	NaN	NaN	NaN	NaN
NaN	NaN	NaN	NaN	NaN	NaN	NaN	NaN	NaN	NaN	NaN	NaN
NaN	NaN	NaN	NaN	NaN	NaN	NaN	NaN	NaN	NaN	NaN	NaN
NaN	NaN	NaN	NaN	NaN	NaN	NaN	NaN	NaN	NaN	NaN	NaN
NaN	NaN	NaN	NaN	NaN	NaN	NaN	NaN	NaN	NaN	NaN	NaN
NaN	NaN	NaN	NaN	NaN	NaN	NaN	NaN	NaN	NaN	NaN	NaN
NaN	NaN	NaN	NaN	NaN	NaN	NaN	NaN	NaN	NaN	NaN	NaN
NaN	NaN	NaN	NaN	NaN	NaN	NaN	NaN	NaN	NaN	NaN	NaN
NaN	NaN	NaN	NaN	NaN	NaN	NaN	NaN	NaN	NaN	NaN	NaN
NaN	NaN	NaN	NaN	NaN	NaN	NaN	NaN	NaN	NaN	NaN	NaN
NaN	NaN	NaN	NaN	NaN	NaN	NaN	NaN	NaN	NaN	NaN	NaN
NaN	NaN	NaN	NaN	NaN	NaN	NaN	NaN	NaN	NaN	NaN	NaN
NaN	NaN	NaN	NaN	NaN	NaN	NaN	NaN	NaN	NaN	NaN	NaN
NaN	NaN	NaN	NaN	NaN	NaN	NaN	NaN	NaN	NaN	NaN	NaN
NaN	NaN	NaN	NaN	NaN	NaN	NaN	NaN	NaN	NaN	NaN	NaN
NaN	NaN	NaN	NaN	NaN	NaN	NaN	NaN	NaN	NaN	NaN	NaN
NaN	NaN	NaN	NaN	NaN	NaN	NaN	NaN	NaN	NaN	NaN	NaN
NaN	NaN	NaN	NaN	NaN	NaN	NaN	NaN	NaN	NaN	NaN	NaN
NaN	NaN	NaN	NaN	NaN	NaN	NaN	NaN	NaN	NaN	NaN	NaN
NaN	NaN	NaN	NaN	NaN	NaN	NaN	NaN	NaN	NaN	NaN	NaN
NaN	NaN	NaN	NaN	NaN	NaN	NaN	NaN	NaN	NaN	NaN	NaN
NaN	NaN	NaN	NaN	NaN	NaN	NaN	NaN	NaN	NaN	NaN	NaN
NaN	NaN	NaN	NaN	NaN	NaN	NaN	NaN	NaN	NaN	NaN	NaN
NaN	NaN	NaN	NaN	NaN	NaN	NaN	NaN	NaN	NaN	NaN	NaN
NaN	NaN	NaN	NaN	NaN	NaN	NaN	NaN	NaN	NaN	NaN	NaN
NaN	NaN	NaN	NaN	NaN	NaN	NaN	NaN	NaN	NaN	NaN	NaN
NaN	NaN	NaN	NaN	NaN	NaN	NaN	NaN	NaN	NaN	NaN	NaN
NaN	NaN	NaN	NaN	NaN	NaN	NaN	NaN	NaN	NaN	NaN	NaN
NaN	NaN	NaN	NaN	NaN	NaN	NaN	NaN	NaN	NaN	NaN	NaN
NaN	NaN	NaN	NaN	NaN	NaN	NaN	NaN	NaN	NaN	NaN	NaN
NaN	NaN	NaN	NaN	NaN	NaN	NaN	NaN	NaN	NaN	NaN	NaN
NaN	NaN	NaN	NaN	NaN	NaN	NaN	NaN	NaN	NaN	NaN	NaN
NaN	NaN	NaN	NaN	NaN	NaN	NaN	NaN	NaN	NaN	NaN	NaN
NaN	NaN	NaN	NaN	NaN	NaN	NaN	NaN	NaN	NaN	NaN	NaN
NaN	NaN	NaN	NaN	NaN	NaN	NaN	NaN	NaN	NaN	NaN	NaN
NaN	NaN	NaN	NaN	NaN	NaN	NaN	NaN	NaN	NaN	NaN	NaN
NaN	NaN	NaN	NaN	NaN	NaN	NaN	NaN	NaN	NaN	NaN	NaN
NaN	NaN	NaN	NaN	NaN	NaN	NaN	NaN	NaN	NaN	NaN	NaN
NaN	NaN	NaN	NaN	NaN	NaN	NaN	NaN	NaN	NaN	NaN	NaN
NaN	NaN	NaN	NaN	NaN	NaN	NaN	NaN	NaN	NaN	NaN	NaN
NaN	NaN	NaN	NaN	NaN	NaN	NaN	NaN	NaN	NaN	NaN	NaN
NaN	NaN	NaN	NaN	NaN	NaN	NaN	NaN	NaN	NaN	NaN	NaN
NaN	NaN	NaN	NaN	NaN	NaN	NaN	NaN	NaN	NaN	NaN	NaN
NaN	NaN	NaN	NaN	NaN	NaN	NaN	NaN	NaN	NaN	NaN	NaN
NaN	NaN	NaN	NaN	NaN	NaN	NaN	NaN	NaN	NaN	NaN	NaN
NaN	NaN	NaN	NaN	NaN	NaN	NaN	NaN	NaN	NaN	NaN	NaN
NaN	NaN	NaN	NaN	NaN	NaN	NaN	NaN	NaN	NaN	NaN	NaN
NaN	NaN	NaN	NaN	NaN	NaN	NaN	NaN	NaN	NaN	NaN	NaN
NaN	NaN	NaN	NaN	NaN	NaN	NaN	NaN	NaN	NaN	NaN	NaN
NaN	NaN	NaN	NaN	NaN	NaN	NaN	NaN	NaN	NaN	NaN	NaN
NaN	NaN	NaN	NaN	NaN	NaN	NaN	NaN	NaN	NaN	NaN	NaN
NaN	NaN	NaN	NaN	NaN	NaN	NaN	NaN	NaN	NaN	NaN	NaN
NaN	NaN	NaN	NaN	NaN	NaN	NaN	NaN	NaN	NaN	NaN	NaN
NaN	NaN	NaN	NaN	NaN	NaN	NaN	NaN	NaN	NaN	NaN	NaN
NaN	NaN	NaN	NaN	NaN	NaN	NaN	NaN	NaN	NaN	NaN	NaN
NaN	NaN	NaN	NaN	NaN	NaN	NaN	NaN	NaN	NaN	NaN	NaN
NaN	NaN	NaN	NaN	NaN	NaN	NaN	NaN	NaN	NaN	NaN	NaN
NaN	NaN	NaN	NaN	NaN	NaN	NaN	NaN	NaN	NaN	NaN	NaN
NaN	NaN	NaN	NaN	NaN	NaN	NaN	NaN	NaN	NaN	NaN	NaN
NaN	NaN	NaN	NaN	NaN	NaN	NaN	NaN	NaN	NaN	NaN	NaN
NaN	NaN	NaN	NaN	NaN	NaN	NaN	NaN	NaN	NaN	NaN	NaN
NaN	NaN	NaN	NaN	NaN	NaN	NaN	NaN	NaN	NaN	NaN	NaN
NaN	NaN	NaN	NaN	NaN	NaN	NaN	NaN	NaN	NaN	NaN	NaN
NaN	NaN	NaN	NaN	NaN	NaN	NaN	NaN	NaN	NaN	NaN	NaN
NaN	NaN	NaN	NaN	NaN	NaN	NaN	NaN	NaN	NaN	NaN	NaN
NaN	NaN	NaN	NaN	NaN	NaN	NaN	NaN	NaN	NaN	NaN	NaN
NaN	NaN	NaN	NaN	NaN	NaN	NaN	NaN	NaN	NaN	NaN	NaN
NaN	NaN	NaN	NaN	NaN	NaN	NaN	NaN	NaN	NaN	NaN	NaN
NaN	NaN	NaN	NaN	NaN	NaN	NaN	NaN	NaN	NaN	NaN	NaN
NaN	NaN	NaN	NaN	NaN	NaN	NaN	NaN	NaN	NaN	NaN	NaN
NaN	NaN	NaN	NaN	NaN	NaN	NaN	NaN	NaN	NaN	NaN	NaN
NaN	NaN	NaN	NaN	NaN	NaN	NaN	NaN	NaN	NaN	NaN	NaN
NaN	NaN	NaN	NaN	NaN	NaN	NaN	NaN	NaN	NaN	NaN	NaN
NaN	NaN	NaN	NaN	NaN	NaN	NaN	NaN	NaN	NaN	NaN	NaN
NaN	NaN	NaN	NaN	NaN	NaN	NaN	NaN	NaN	NaN	NaN	NaN
NaN	NaN	NaN	NaN	NaN	NaN	NaN	NaN	NaN	NaN	NaN	NaN
NaN	NaN	NaN	NaN	NaN	NaN	NaN	NaN	NaN	NaN	NaN	NaN
NaN	NaN	NaN	NaN	NaN	NaN	NaN	NaN	NaN	NaN	NaN	NaN
NaN	NaN	NaN	NaN	NaN	NaN	NaN	NaN	NaN	NaN	NaN	NaN
NaN	NaN	NaN	NaN	NaN	NaN	NaN	NaN	NaN	NaN	NaN	NaN
NaN	NaN	NaN	NaN	NaN	NaN	NaN	NaN	NaN	NaN	NaN	NaN
NaN	NaN	NaN	NaN	NaN	NaN	NaN	NaN	NaN	NaN	NaN	NaN
NaN	NaN	NaN	NaN	NaN	NaN	NaN	NaN	NaN	NaN	NaN	NaN
-3.71846	2.34309	1.20888	-3.83785	2.29015	1.38616	-3.70857	2.30355	1.32853	-3.55681	2.35284	1.47123
-3.71075	2.33157	1.20361	-3.8409	2.25286	1.38145	-3.70764	2.28223	1.32793	-3.56032	2.37306	1.47067
-3.71079	2.29945	1.1934	-3.84138	2.2392	1.37794	-3.69311	2.32124	1.31898	-3.62608	2.44689	1.45801
-3.70127	2.30068	1.19401	-3.81892	2.27057	1.37721	-3.68474	2.37443	1.3197	-3.53719	2.90416	1.436
-3.666	2.36874	1.20393	-3.7983	2.31122	1.37778	-3.68093	2.35484	1.30948	-3.74248	2.49899	1.25291
-3.67382	2.33972	1.18601	-3.80824	2.25627	1.36667	-3.70631	2.28911	1.30984	-3.68554	2.64335	1.18613
-3.64506	2.40403	1.19653	-3.787	2.27205	1.36835	-3.69847	2.27567	1.30866	-3.73568	2.42226	1.06753
-3.62758	2.40411	1.18724	-3.78333	2.2706	1.36625	-3.6628	2.31657	1.3113	-3.65446	2.48648	1.07555
-3.62544	2.3874	1.18432	-3.77246	2.27911	1.36775	-3.65154	2.32068	1.3081	-3.66012	2.43778	1.07989
-3.62263	2.36954	1.17685	-3.78001	2.23866	1.35738	-3.62611	2.3575	1.31075	-3.67901	2.51237	1.11253
-3.62091	2.3582	1.17434	-3.75152	2.27188	1.36668	-3.62394	2.3357	1.30672	-3.69631	2.53638	1.20096
-3.59031	2.37503	1.17752	-3.76012	2.24549	1.35731	-3.60653	2.3606	1.31163	-3.66622	2.42244	1.31706
-3.58264	2.36958	1.1765	-3.73138	2.264	1.34477	-3.57413	2.41512	1.30951	-3.48033	2.40388	1.41338
-3.557	2.41401	1.17682	-3.72091	2.26109	1.33686	-3.57195	2.38527	1.29119	-3.46476	2.21566	1.40156
-3.54141	2.43774	1.17353	-3.68985	2.30374	1.34743	-3.56208	2.35711	1.27723	-3.35723	2.3966	1.40296
-3.54459	2.38493	1.15468	-3.69927	2.27694	1.34541	-3.56155	2.30178	1.24998	-3.34756	2.33515	1.37098
-3.53732	2.37861	1.14561	-3.67497	2.31256	1.34695	-3.56008	2.29395	1.24433	-3.36756	2.46551	1.37455
-3.52181	2.37646	1.14696	-3.66302	2.34502	1.3475	-3.54974	2.28658	1.24589	-3.43476	2.54081	1.31118
-3.53244	2.31626	1.13573	-3.6547	2.33231	1.33275	-3.52522	2.33147	1.24818	-3.56193	2.42893	1.20071
-3.53328	2.30806	1.13371	-3.63762	2.35426	1.32879	-3.50697	2.37426	1.25318	-3.54779	2.52712	1.05727
-3.51456	2.32267	1.12662	-3.62679	2.36345	1.32927	-3.50008	2.37708	1.25358	-3.56329	2.4269	1.01153
-3.50271	2.3222	1.11864	-3.62715	2.3209	1.31967	-3.4958	2.36463	1.25044	-3.53256	2.45145	0.991785
-3.48948	2.32394	1.11914	-3.63113	2.27888	1.30653	-3.48065	2.37271	1.25355	-3.53727	2.38224	0.978887
-3.47955	2.32388	1.11976	-3.60678	2.32328	1.31044	-3.47401	2.37484	1.24113	-3.51678	2.47336	1.016
-3.45438	2.35757	1.12077	-3.57874	2.36645	1.31015	-3.46324	2.37435	1.23489	-3.48882	2.58465	1.07015
-3.45846	2.32538	1.11022	-3.56087	2.37661	1.2978	-3.45624	2.37942	1.23365	-3.34428	2.83653	1.2293
-3.44531	2.32845	1.0997	-3.56088	2.3508	1.28552	-3.44636	2.34861	1.22408	-3.33665	2.33721	1.36708
-3.41219	2.37806	1.09486	-3.52689	2.39111	1.28237	-3.42442	2.33379	1.20846	-3.31681	2.17862	1.36235
-3.39475	2.34621	1.09494	-3.5194	2.39924	1.27579	-3.39075	2.37265	1.19966	-3.25114	2.28254	1.33109
-3.36623	2.39983	1.09639	-3.51766	2.37012	1.27054	-3.36559	2.40529	1.1903	-3.21829	2.28551	1.33073
-3.36847	2.3643	1.08896	-3.50426	2.40221	1.26925	-3.3453	2.41552	1.18558	-3.26987	2.28312	1.32674
-3.37262	2.3376	1.07884	-3.48876	2.40289	1.26169	-3.35289	2.36059	1.17384	-3.33002	2.15699	1.33796
-3.38142	2.2607	1.06754	-3.50237	2.3468	1.23868	-3.34093	2.36358	1.16685	-3.42049	2.11999	1.26392
-3.3553	2.29404	1.06862	-3.49499	2.32299	1.22945	-3.35892	2.33516	1.16653	-3.50221	2.1224	1.15888
-3.35159	2.27448	1.05888	-3.48606	2.31339	1.23197	-3.31251	2.39381	1.16765	-3.43895	2.27903	1.1484
-3.34991	2.24564	1.04647	-3.43219	2.43525	1.22862	-3.30948	2.37819	1.15423	-3.40359	2.30663	1.12064
-3.34576	2.25457	1.05076	-3.42078	2.43888	1.23137	-3.3014	2.36515	1.14581	-3.38099	2.28672	1.10065
-3.32316	2.27792	1.05186	-3.42894	2.38	1.21027	-3.2955	2.37246	1.14402	-3.46706	2.07338	1.09859
-3.29635	2.30443	1.03919	-3.41656	2.38285	1.20303	-3.29528	2.3587	1.13852	-3.48887	1.8691	1.07562
-3.26538	2.34827	1.0387	-3.3765	2.44423	1.189	-3.26331	2.3976	1.13891	-3.39989	2.05941	1.24764
-3.22757	2.39766	1.04589	-3.3814	2.41829	1.17554	-3.23582	2.42966	1.13542	-3.27641	2.19771	1.32185
-3.22698	2.36619	1.02865	-3.353	2.46287	1.17406	-3.2253	2.44595	1.13944	-3.17107	2.29575	1.34264
-3.22248	2.33238	1.023	-3.35247	2.42383	1.15876	-3.214	2.40792	1.12879	-3.10867	2.32638	1.31106
-3.20973	2.32207	1.0079	-3.32839	2.46984	1.15561	-3.21226	2.36828	1.10431	-3.09064	2.34983	1.30764
-3.23145	2.23463	0.989735	-3.33459	2.40916	1.13687	-3.20427	2.36323	1.09728	-3.13106	2.27786	1.31469
-3.19052	2.28838	0.99042	-3.33505	2.38567	1.13284	-3.17603	2.40357	1.09584	-3.2133	2.22663	1.32206
-3.19126	2.24356	0.977964	-3.29897	2.45152	1.1375	-3.15514	2.42142	1.09143	-3.25535	2.28283	1.27383
-3.14221	2.34419	0.994437	-3.30224	2.4115	1.11413	-3.1645	2.35121	1.07719	-3.34424	2.13886	1.1182
-3.14915	2.26525	0.978662	-3.27849	2.43497	1.1074	-3.16353	2.31786	1.06792	-3.28495	2.20962	1.05965
-3.1253	2.27596	0.972546	-3.27295	2.41488	1.09315	-3.1707	2.2748	1.05531	-3.22882	2.23271	0.995786
-3.1093	2.28319	0.96995	-3.23726	2.44457	1.08027	-3.17107	2.25753	1.04903	-3.20177	2.19266	0.975278
-3.10531	2.2804	0.962184	-3.20927	2.4754	1.07182	-3.15737	2.28715	1.05725	-3.23524	2.19358	0.987169
-3.087	2.29193	0.963928	-3.1883	2.49249	1.06358	-3.14796	2.28855	1.06204	-3.29814	2.00525	1.02385
-3.06138	2.30229	0.962864	-3.18173	2.48487	1.05602	-3.13291	2.29643	1.05898	-3.2606	2.1963	1.18027
-3.04028	2.3015	0.953163	-3.19512	2.42701	1.02408	-3.09115	2.32961	1.04798	-3.18215	2.29396	1.25413
-3.03099	2.29961	0.943591	-3.17349	2.4289	1.01897	-3.08646	2.28324	1.03266	-3.11362	2.2531	1.26638
-3.01265	2.31229	0.944681	-3.16216	2.44098	1.01805	-3.07284	2.28051	1.01282	-3.02715	2.34637	1.27964
-2.97999	2.31586	0.946354	-3.11981	2.5116	1.0168	-3.06603	2.26139	1.00588	-3.0374	2.34048	1.25471
-2.98654	2.27752	0.930675	-3.11056	2.48699	0.998474	-3.05416	2.27091	0.994777	-3.09855	2.31673	1.22608
-2.9655	2.28335	0.918641	-3.11987	2.44194	0.97807	-3.04808	2.24306	0.980042	-3.13601	2.26648	1.18094
-2.95759	2.2641	0.906967	-3.10866	2.44904	0.958798	-3.02882	2.25623	0.978532	-3.17014	2.19934	1.07953
-2.93256	2.2915	0.909329	-3.07654	2.49177	0.960764	-3.0051	2.2923	0.97599	-3.12774	2.15892	0.967201
-2.89583	2.36584	0.919202	-3.08718	2.42841	0.939782	-3.0144	2.23738	0.957509	-3.03598	2.24715	0.908314
-2.89503	2.30528	0.910235	-3.0679	2.43125	0.931379	-3.01734	2.1948	0.944124	-2.96609	2.261	0.896043
-2.88393	2.29384	0.908007	-3.05474	2.43224	0.924131	-2.99808	2.20139	0.949945	-2.98862	2.09669	0.871807
-2.87757	2.27341	0.887084	-3.03089	2.46346	0.923975	-2.97194	2.22367	0.944078	-2.96096	2.13852	0.889518
-2.86419	2.26874	0.87905	-3.00738	2.50837	0.922926	-2.93769	2.28592	0.944233	-3.09683	2.14357	0.990302
-2.83293	2.29545	0.879519	-3.01512	2.42244	0.899652	-2.90668	2.32677	0.946444	-3.08297	2.23969	1.077
-2.81902	2.28355	0.869398	-2.9982	2.4063	0.88296	-2.87734	2.33918	0.947583	-3.0031	2.33773	1.14594
-2.80839	2.26154	0.864435	-2.9842	2.42021	0.878499	-2.87366	2.29933	0.936225	-2.94317	2.33349	1.16713
-2.79282	2.26456	0.86128	-2.98012	2.39585	0.863768	-2.86402	2.3178	0.923188	-2.90775	2.29523	1.15079
-2.79974	2.20704	0.845773	-2.96415	2.39092	0.845105	-2.85277	2.32886	0.920121	-2.94635	2.27469	1.12129
-2.75954	2.26302	0.843713	-2.93333	2.44001	0.851685	-2.84496	2.29625	0.896982	-3.00037	2.18884	1.0437
-2.76918	2.19354	0.813531	-2.92112	2.45693	0.84365	-2.83507	2.27657	0.879025	-3.02231	2.0752	0.940533
-2.76486	2.18642	0.808968	-2.90849	2.4561	0.824438	-2.82347	2.26404	0.872702	-2.93956	2.14362	0.857626
-2.73899	2.21478	0.805592	-2.91855	2.39316	0.807875	-2.80806	2.25753	0.863416	-2.85369	2.12929	0.777974
-2.7223	2.23161	0.812583	-2.88769	2.41935	0.816397	-2.79117	2.27125	0.866163	-2.70103	2.27636	0.795907
-2.70812	2.21622	0.807545	-2.87667	2.40936	0.811579	-2.77674	2.27178	0.868004	-2.6961	2.32921	0.813315
-2.68567	2.22641	0.807061	-2.83619	2.43661	0.802831	-2.75883	2.28004	0.859917	-2.68654	2.21005	0.754754
-2.6539	2.27359	0.809617	-2.82428	2.41863	0.795146	-2.73063	2.28951	0.849681	-2.74953	2.2224	0.75405
-2.62576	2.3002	0.811009	-2.82527	2.41624	0.78163	-2.71763	2.27194	0.846	-2.86281	2.08764	0.767412
-2.61503	2.27973	0.805421	-2.79907	2.44388	0.773092	-2.69362	2.2953	0.84554	-2.8804	2.18715	0.874305
-2.58767	2.29167	0.791797	-2.76277	2.47347	0.771102	-2.68839	2.27739	0.830097	-2.84928	2.29979	0.98928
-2.56699	2.29142	0.789605	-2.77015	2.39218	0.744744	-2.66961	2.28484	0.829092	-2.82661	2.236	1.01217
-2.55644	2.27849	0.785631	-2.74706	2.41298	0.730719	-2.6478	2.3134	0.825907	-2.74144	2.33246	1.022
-2.56217	2.23667	0.773264	-2.74424	2.36472	0.71447	-2.64425	2.28819	0.811431	-2.7279	2.35132	1.01897
-2.54359	2.24036	0.770009	-2.73993	2.32507	0.701627	-2.63277	2.29427	0.806811	-2.73922	2.35502	0.949428
-2.51058	2.27591	0.773118	-2.68678	2.42838	0.695301	-2.60546	2.30109	0.793382	-2.7331	2.27198	0.843157
-2.48212	2.30341	0.775391	-2.67828	2.40414	0.698274	-2.59553	2.25751	0.779944	-2.63974	2.1614	0.736551
-2.46639	2.30725	0.770913	-2.66532	2.38673	0.68136	-2.58472	2.25367	0.776917	-2.51886	2.18478	0.717489
-2.45365	2.30154	0.763391	-2.6368	2.40577	0.678087	-2.57206	2.23419	0.772998	-2.37101	2.26853	0.734785
-2.43231	2.31339	0.75568	-2.60785	2.43315	0.678447	-2.55219	2.23679	0.773345	-2.29865	2.37397	0.773883
-2.43028	2.30529	0.752855	-2.63469	2.31878	0.639252	-2.53396	2.23421	0.773154	-2.3377	2.23501	0.735004
-2.42602	2.29598	0.748775	-2.60596	2.34325	0.638393	-2.5061	2.26959	0.774923	-2.33992	2.33596	0.732858
-2.41908	2.24694	0.731227	-2.5975	2.31612	0.618713	-2.46998	2.31984	0.776218	-2.40509	2.36533	0.692168
-2.42193	2.22328	0.736761	-2.57837	2.32952	0.620263	-2.47266	2.2681	0.757501	-2.56249	2.25712	0.729895
-2.40788	2.20238	0.730916	-2.53342	2.4005	0.614087	-2.47663	2.22721	0.744897	-2.63651	2.29041	0.786861
-2.38273	2.23333	0.731059	-2.50223	2.41981	0.604959	-2.49024	2.20246	0.733484	-2.63792	2.30341	0.852865
-2.35705	2.24894	0.734788	-2.48204	2.39472	0.595813	-2.45905	2.2368	0.732421	-2.59936	2.37946	0.886247
-2.32728	2.28421	0.7368	-2.48418	2.35831	0.584432	-2.43879	2.24197	0.730078	-2.60948	2.33244	0.861142
-2.311	2.29122	0.727089	-2.48174	2.28159	0.567665	-2.41075	2.28612	0.730741	-2.58732	2.3866	0.83444
-2.30373	2.26783	0.719008	-2.44435	2.33746	0.56279	-2.39789	2.27999	0.718469	-2.61027	2.20798	0.700935
-2.28875	2.25845	0.716706	-2.41291	2.37806	0.563825	-2.4104	2.21635	0.703971	-2.49821	2.23647	0.649247
-2.26936	2.27893	0.722551	-2.39778	2.38269	0.549101	-2.38705	2.25902	0.707626	-2.3893	2.27211	0.62856
-2.25634	2.26856	0.718109	-2.38418	2.3829	0.537687	-2.37216	2.26696	0.700086	-2.23981	2.27009	0.651733
-2.23913	2.25533	0.719202	-2.34334	2.42061	0.541737	-2.34317	2.30324	0.699108	-2.18135	2.22475	0.709337
-2.22092	2.27169	0.722656	-2.34364	2.35437	0.530084	-2.31392	2.33099	0.702868	-2.14364	2.25611	0.758513
-2.20871	2.26859	0.720895	-2.35078	2.29273	0.508898	-2.32523	2.26883	0.681588	-2.13165	2.28604	0.748692
-2.20001	2.24802	0.712184	-2.32643	2.30032	0.511439	-2.33341	2.19689	0.65911	-2.18127	2.39808	0.697905
-2.20541	2.17787	0.688329	-2.29439	2.33075	0.511671	-2.32931	2.16491	0.64448	-2.33004	2.27835	0.628323
-2.19477	2.16703	0.67676	-2.27122	2.34487	0.511234	-2.31414	2.13806	0.637166	-2.41538	2.39366	0.674596
-2.16587	2.20278	0.676723	-2.26024	2.33752	0.502906	-2.28908	2.16577	0.636419	-2.43127	2.4057	0.728468
-2.14567	2.21646	0.679653	-2.25547	2.29975	0.488401	-2.25811	2.21196	0.643593	-2.46316	2.28814	0.714808
-2.13347	2.21101	0.68015	-2.24726	2.27747	0.481024	-2.23001	2.24449	0.650423	-2.45047	2.2301	0.676277
-2.11059	2.22036	0.681226	-2.23963	2.24374	0.469354	-2.22188	2.22422	0.634431	-2.41402	2.28735	0.634521
-2.09244	2.21665	0.679823	-2.22796	2.23643	0.467825	-2.21113	2.21536	0.622752	-2.28545	2.44732	0.584371
-2.0833	2.21918	0.671374	-2.20203	2.27287	0.470919	-2.21639	2.15853	0.605066	-2.16244	2.38406	0.556712
-2.06359	2.22581	0.659679	-2.17817	2.29028	0.471167	-2.20966	2.13485	0.592588	-2.07538	2.30508	0.544943
-2.0703	2.17369	0.652266	-2.14713	2.31545	0.471636	-2.1966	2.11864	0.579724	-1.97822	2.37767	0.616831
-2.05609	2.15611	0.643035	-2.14809	2.24811	0.451469	-2.16489	2.16113	0.58498	-1.8892	2.48783	0.710433
-2.03065	2.20289	0.655885	-2.14417	2.21745	0.44041	-2.13979	2.17181	0.586569	-1.90073	2.43834	0.715283
-2.01426	2.2268	0.662259	-2.1339	2.19177	0.43132	-2.1238	2.16416	0.583563	-1.86201	2.73377	0.680184
-1.9806	2.26015	0.660434	-2.11698	2.19099	0.43039	-2.10236	2.16901	0.583573	-2.04615	2.53104	0.609886
-1.97635	2.22048	0.644243	-2.10502	2.21965	0.431319	-2.09072	2.16024	0.583443	-2.1652	2.51051	0.613208
-1.94519	2.26001	0.641674	-2.08322	2.23225	0.432734	-2.06595	2.2048	0.584674	-2.24177	2.37704	0.620965
-1.93311	2.25635	0.630522	-2.05121	2.26542	0.434198	-2.0404	2.24152	0.587391	-2.2658	2.28669	0.656646
-1.91871	2.25573	0.625661	-2.05153	2.20462	0.413652	-2.02271	2.26689	0.585794	-2.20242	2.40098	0.643246
-1.91465	2.21169	0.622844	-2.05222	2.16473	0.400509	-1.99673	2.29699	0.585765	-2.15646	2.40472	0.579196
-1.88743	2.2305	0.624569	-2.04643	2.13632	0.392391	-1.97716	2.29824	0.590001	-2.04642	2.5553	0.572497
-1.87227	2.24466	0.624281	-2.00739	2.20499	0.403812	-1.95292	2.31451	0.590189	-1.94576	2.40637	0.526676
-1.86687	2.20782	0.614547	-1.98041	2.23452	0.40204	-1.95469	2.26872	0.574335	-1.80429	2.4989	0.541009
-1.84896	2.18555	0.606041	-1.96808	2.23196	0.396152	-1.9618	2.20972	0.556209	-1.69267	2.5043	0.594263
-1.87253	2.11053	0.584301	-1.95078	2.22576	0.394216	-1.96218	2.17311	0.544313	-1.64765	2.48671	0.642182
-1.87342	2.06667	0.567692	-1.9469	2.20857	0.392973	-1.94982	2.17371	0.532912	-1.71456	2.23084	0.603616
-1.85796	2.10216	0.567979	-1.93774	2.21013	0.39472	-1.92104	2.21981	0.538934	-1.68178	2.31578	0.60544
-1.83654	2.12657	0.563287	-1.917	2.21291	0.394191	-1.91242	2.20346	0.530766	-1.6581	2.48101	0.556769
-1.8085	2.15045	0.565865	-1.89399	2.22011	0.396625	-1.89235	2.19685	0.538177	-1.78681	2.49543	0.519216
-1.79166	2.14839	0.567116	-1.89952	2.18465	0.384646	-1.87474	2.18816	0.532558	-1.96488	2.42587	0.542745
-1.75497	2.1698	0.567158	-1.89424	2.16197	0.37481	-1.85262	2.20348	0.529242	-2.02686	2.35122	0.583385
-1.73168	2.19609	0.567723	-1.87674	2.15429	0.373468	-1.83168	2.20572	0.532478	-1.99619	2.35286	0.639207
-1.70939	2.1974	0.56726	-1.85526	2.15885	0.37451	NaN	NaN	NaN	NaN	NaN	NaN
-1.70366	2.1668	0.556351	-1.81869	2.21827	0.374123	NaN	NaN	NaN	NaN	NaN	NaN
-1.69885	2.13654	0.547704	-1.80333	2.24527	0.376801	NaN	NaN	NaN	NaN	NaN	NaN
-1.68338	2.11042	0.537223	-1.78101	2.25977	0.375406	NaN	NaN	NaN	NaN	NaN	NaN
-1.66611	2.11088	0.529269	-1.74778	2.29789	0.378846	NaN	NaN	NaN	NaN	NaN	NaN
-1.64744	2.13202	0.529575	-1.72832	2.2959	0.379443	NaN	NaN	NaN	NaN	NaN	NaN
-1.62916	2.14408	0.530555	-1.73155	2.26479	0.37942	NaN	NaN	NaN	NaN	NaN	NaN
-1.61405	2.15487	0.530001	-1.7426	2.22836	0.368392	NaN	NaN	NaN	NaN	NaN	NaN
-1.60399	2.15161	0.530466	-1.74589	2.192	0.363321	NaN	NaN	NaN	NaN	NaN	NaN
-1.57597	2.18841	0.531645	-1.73206	2.16353	0.354734	NaN	NaN	NaN	NaN	NaN	NaN
-1.55716	2.20739	0.525671	-1.71023	2.16329	0.353493	NaN	NaN	NaN	NaN	NaN	NaN
-1.54439	2.19168	0.529386	-1.68562	2.18332	0.361094	NaN	NaN	NaN	NaN	NaN	NaN
-1.5218	2.20623	0.531315	-1.66877	2.17048	0.355849	NaN	NaN	NaN	NaN	NaN	NaN
-1.50462	2.22206	0.531656	-1.67254	2.11539	0.335723	NaN	NaN	NaN	NaN	NaN	NaN
-1.50603	2.15558	0.520446	-1.66945	2.11486	0.32696	NaN	NaN	NaN	NaN	NaN	NaN
-1.49638	2.13842	0.509652	-1.64104	2.14932	0.327492	NaN	NaN	NaN	NaN	NaN	NaN
-1.47275	2.15873	0.50972	-1.59835	2.24105	0.343755	NaN	NaN	NaN	NaN	NaN	NaN
-1.46601	2.12845	0.500693	-1.57688	2.25476	0.343547	NaN	NaN	NaN	NaN	NaN	NaN
-1.46422	2.08894	0.489061	-1.56003	2.24645	0.340549	NaN	NaN	NaN	NaN	NaN	NaN
-1.453	2.07839	0.483123	-1.55887	2.22525	0.341628	NaN	NaN	NaN	NaN	NaN	NaN
-1.43437	2.09628	0.488485	-1.54181	2.21132	0.339043	NaN	NaN	NaN	NaN	NaN	NaN
-1.41406	2.12196	0.497799	-1.53189	2.18731	0.33877	NaN	NaN	NaN	NaN	NaN	NaN
-1.4085	2.0998	0.489692	-1.51304	2.18599	0.338819	NaN	NaN	NaN	NaN	NaN	NaN
-1.39468	2.11504	0.490447	-1.50805	2.18696	0.337963	NaN	NaN	NaN	NaN	NaN	NaN
-1.36928	2.13058	0.497517	-1.49407	2.18012	0.335407	NaN	NaN	NaN	NaN	NaN	NaN
-1.35668	2.12478	0.497261	-1.47048	2.19502	0.342033	NaN	NaN	NaN	NaN	NaN	NaN
-1.34893	2.11486	0.483272	-1.46907	2.15732	0.32823	NaN	NaN	NaN	NaN	NaN	NaN
-1.31686	2.16629	0.491412	-1.4655	2.13212	0.317988	NaN	NaN	NaN	NaN	NaN	NaN
-1.29585	2.16943	0.493337	-1.45162	2.12991	0.318513	NaN	NaN	NaN	NaN	NaN	NaN
-1.27887	2.18027	0.493345	-1.43334	2.12806	0.317395	NaN	NaN	NaN	NaN	NaN	NaN
-1.28255	2.13856	0.490468	-1.41475	2.12921	0.3183	NaN	NaN	NaN	NaN	NaN	NaN
-1.26125	2.16323	0.490713	-1.39194	2.13313	0.317708	NaN	NaN	NaN	NaN	NaN	NaN
-1.23957	2.17291	0.493408	-1.38709	2.13106	0.318137	NaN	NaN	NaN	NaN	NaN	NaN
-1.21724	2.18003	0.495134	-1.37848	2.13323	0.318922	NaN	NaN	NaN	NaN	NaN	NaN
-1.20829	2.17281	0.491867	-1.35962	2.12919	0.317063	NaN	NaN	NaN	NaN	NaN	NaN
-1.18529	2.1887	0.497168	-1.33894	2.13827	0.31938	NaN	NaN	NaN	NaN	NaN	NaN
-1.16905	2.19307	0.495188	-1.32809	2.14213	0.318155	NaN	NaN	NaN	NaN	NaN	NaN
-1.16081	2.17781	0.492644	-1.31483	2.13658	0.317827	NaN	NaN	NaN	NaN	NaN	NaN
-1.16094	2.15639	0.483272	-1.29269	2.14746	0.311922	NaN	NaN	NaN	NaN	NaN	NaN
-1.1587	2.11918	0.474664	-1.28554	2.14111	0.305771	NaN	NaN	NaN	NaN	NaN	NaN
-1.14028	2.12203	0.472609	-1.26732	2.14128	0.299103	NaN	NaN	NaN	NaN	NaN	NaN
-1.1339	2.12498	0.472591	-1.24125	2.14788	0.300277	NaN	NaN	NaN	NaN	NaN	NaN
-1.11876	2.12269	0.471154	-1.21918	2.18089	0.311061	NaN	NaN	NaN	NaN	NaN	NaN
-1.11747	2.09327	0.471879	-1.20088	2.19494	0.315727	NaN	NaN	NaN	NaN	NaN	NaN
-1.09223	2.11924	0.471901	-1.18321	2.18229	0.321035	NaN	NaN	NaN	NaN	NaN	NaN
-1.06819	2.12968	0.475384	-1.16801	2.18817	0.320756	NaN	NaN	NaN	NaN	NaN	NaN
-1.04823	2.16127	0.476593	-1.16734	2.18209	0.312351	NaN	NaN	NaN	NaN	NaN	NaN
-1.05526	2.10802	0.461662	-1.15824	2.16271	0.30539	NaN	NaN	NaN	NaN	NaN	NaN
-1.04632	2.10065	0.453263	-1.14731	2.15471	0.300662	NaN	NaN	NaN	NaN	NaN	NaN
-1.01819	2.14883	0.458552	-1.13916	2.15538	0.299412	NaN	NaN	NaN	NaN	NaN	NaN
-1.00578	2.14952	0.452554	-1.12652	2.14555	0.296615	NaN	NaN	NaN	NaN	NaN	NaN
-0.993124	2.14436	0.452672	-1.10768	2.16721	0.304244	NaN	NaN	NaN	NaN	NaN	NaN
-0.978963	2.14719	0.455048	-1.10052	2.15608	0.299996	NaN	NaN	NaN	NaN	NaN	NaN
-0.972361	2.12946	0.453503	-1.08404	2.15328	0.299251	NaN	NaN	NaN	NaN	NaN	NaN
-0.960258	2.141	0.456647	-1.06066	2.16001	0.30111	NaN	NaN	NaN	NaN	NaN	NaN
-0.940762	2.14446	0.455745	-1.03653	2.16401	0.302557	NaN	NaN	NaN	NaN	NaN	NaN
-0.905364	2.18034	0.457479	-1.05735	2.12936	0.291249	NaN	NaN	NaN	NaN	NaN	NaN
-0.879005	2.20455	0.458881	-1.0502	2.1346	0.292161	NaN	NaN	NaN	NaN	NaN	NaN
-0.861802	2.21023	0.458511	-1.03511	2.15328	0.298438	NaN	NaN	NaN	NaN	NaN	NaN
-0.855702	2.18629	0.44681	-1.01426	2.15995	0.300259	NaN	NaN	NaN	NaN	NaN	NaN
-0.847954	2.16554	0.440733	-0.999027	2.19815	0.303762	NaN	NaN	NaN	NaN	NaN	NaN
-0.853115	2.10676	0.430159	-0.988185	2.18528	0.301487	NaN	NaN	NaN	NaN	NaN	NaN
-0.845435	2.10393	0.433432	-0.983558	2.16183	0.300521	NaN	NaN	NaN	NaN	NaN	NaN
-0.837318	2.08116	0.431695	-0.967578	2.17539	0.301646	NaN	NaN	NaN	NaN	NaN	NaN
-0.815876	2.12065	0.436224	-0.957304	2.17036	0.301483	NaN	NaN	NaN	NaN	NaN	NaN
-0.790289	2.14159	0.433216	-0.953883	2.16401	0.301442	NaN	NaN	NaN	NaN	NaN	NaN
-0.767976	2.16651	0.440598	-0.943304	2.17023	0.302205	NaN	NaN	NaN	NaN	NaN	NaN
-0.729863	2.22844	0.439127	-0.927401	2.13537	0.291362	NaN	NaN	NaN	NaN	NaN	NaN
-0.710533	2.23215	0.440863	-0.918375	2.11149	0.281398	NaN	NaN	NaN	NaN	NaN	NaN
-0.695682	2.23468	0.442393	-0.907786	2.11586	0.282429	NaN	NaN	NaN	NaN	NaN	NaN
-0.693927	2.22215	0.440265	-0.904464	2.10133	0.27905	NaN	NaN	NaN	NaN	NaN	NaN
-0.68267	2.23009	0.438198	-0.887901	2.12208	0.283407	NaN	NaN	NaN	NaN	NaN	NaN
-0.686851	2.19731	0.427379	-0.876215	2.1333	0.279881	NaN	NaN	NaN	NaN	NaN	NaN
-0.681902	2.17755	0.421765	-0.863984	2.14627	0.283988	NaN	NaN	NaN	NaN	NaN	NaN
-0.672134	2.17057	0.414952	-0.864405	2.11883	0.279274	NaN	NaN	NaN	NaN	NaN	NaN
-0.653771	2.16821	0.419101	-0.83908	2.12015	0.283249	NaN	NaN	NaN	NaN	NaN	NaN
-0.630409	2.19439	0.425323	-0.810666	2.15792	0.285591	NaN	NaN	NaN	NaN	NaN	NaN
-0.621988	2.17667	0.42175	-0.784589	2.1973	0.286902	NaN	NaN	NaN	NaN	NaN	NaN
-0.60603	2.17962	0.421682	-0.769964	2.19615	0.288092	NaN	NaN	NaN	NaN	NaN	NaN
-0.604785	2.16959	0.419707	-0.760329	2.1778	0.282178	NaN	NaN	NaN	NaN	NaN	NaN
-0.596261	2.16189	0.414988	-0.742912	2.18144	0.284087	NaN	NaN	NaN	NaN	NaN	NaN
-0.571827	2.18972	0.422937	-0.721357	2.19169	0.285977	NaN	NaN	NaN	NaN	NaN	NaN
-0.556757	2.17728	0.420684	-0.709025	2.19456	0.276338	NaN	NaN	NaN	NaN	NaN	NaN
-0.535519	2.17441	0.420409	-0.682555	2.24788	0.281462	NaN	NaN	NaN	NaN	NaN	NaN
-0.519098	2.1948	0.426723	-0.690174	2.2103	0.277659	NaN	NaN	NaN	NaN	NaN	NaN
-0.511178	2.16254	0.418061	-0.6708	2.23744	0.28298	NaN	NaN	NaN	NaN	NaN	NaN
-0.499034	2.16642	0.415566	-0.648766	2.26141	0.287894	NaN	NaN	NaN	NaN	NaN	NaN
-0.485314	2.17345	0.421095	-0.635299	2.2554	0.287033	NaN	NaN	NaN	NaN	NaN	NaN
-0.466248	2.19678	0.422385	-0.615818	2.26072	0.288861	NaN	NaN	NaN	NaN	NaN	NaN
-0.465909	2.14547	0.420405	-0.622695	2.21747	0.273603	NaN	NaN	NaN	NaN	NaN	NaN
-0.455523	2.12568	0.421165	-0.618432	2.18837	0.265632	NaN	NaN	NaN	NaN	NaN	NaN
-0.454919	2.13625	0.425297	-0.595515	2.21281	0.270927	NaN	NaN	NaN	NaN	NaN	NaN
-0.449754	2.11907	0.418302	-0.595715	2.1909	0.267769	NaN	NaN	NaN	NaN	NaN	NaN
-0.436754	2.14176	0.418016	-0.574933	2.20231	0.267913	NaN	NaN	NaN	NaN	NaN	NaN
-0.428361	2.12979	0.417977	-0.556489	2.20237	0.267441	NaN	NaN	NaN	NaN	NaN	NaN
-0.403508	2.14809	0.421659	-0.538272	2.20043	0.267419	NaN	NaN	NaN	NaN	NaN	NaN
-0.389537	2.16154	0.434041	-0.515079	2.20839	0.269347	NaN	NaN	NaN	NaN	NaN	NaN
-0.367156	2.19366	0.443549	-0.503941	2.2021	0.266996	NaN	NaN	NaN	NaN	NaN	NaN
-0.352432	2.21725	0.442554	-0.504927	2.20442	0.267403	NaN	NaN	NaN	NaN	NaN	NaN
-0.352386	2.18867	0.438295	-0.489525	2.20581	0.266118	NaN	NaN	NaN	NaN	NaN	NaN
-0.340375	2.18955	0.442721	-0.475039	2.20524	0.267738	NaN	NaN	NaN	NaN	NaN	NaN
-0.328427	2.18675	0.441795	-0.458605	2.20813	0.268204	NaN	NaN	NaN	NaN	NaN	NaN
-0.311546	2.18999	0.441753	-0.44355	2.20877	0.26869	NaN	NaN	NaN	NaN	NaN	NaN
-0.289516	2.2176	0.450186	-0.429418	2.20827	0.268371	NaN	NaN	NaN	NaN	NaN	NaN
-0.278223	2.21165	0.446211	-0.419186	2.22608	0.273731	NaN	NaN	NaN	NaN	NaN	NaN
-0.273428	2.14862	0.440298	-0.412192	2.20595	0.266865	NaN	NaN	NaN	NaN	NaN	NaN
-0.259882	2.15348	0.438178	-0.388916	2.21757	0.269189	NaN	NaN	NaN	NaN	NaN	NaN
-0.246719	2.18205	0.439467	-0.379393	2.21112	0.268317	NaN	NaN	NaN	NaN	NaN	NaN
-0.224638	2.19646	0.441015	-0.371784	2.21712	0.268433	NaN	NaN	NaN	NaN	NaN	NaN
-0.218583	2.1919	0.439262	-0.344613	2.21891	0.269972	NaN	NaN	NaN	NaN	NaN	NaN
-0.203275	2.19622	0.44341	-0.346285	2.21825	0.26824	NaN	NaN	NaN	NaN	NaN	NaN
-0.186191	2.19668	0.4406	-0.331417	2.22186	0.268817	NaN	NaN	NaN	NaN	NaN	NaN
-0.175483	2.18088	0.43709	-0.313031	2.21821	0.267591	NaN	NaN	NaN	NaN	NaN	NaN
-0.175706	2.15106	0.439654	-0.308246	2.21551	0.267643	NaN	NaN	NaN	NaN	NaN	NaN
-0.166314	2.13703	0.43949	-0.299726	2.22677	0.270421	NaN	NaN	NaN	NaN	NaN	NaN
-0.165094	2.12525	0.437848	-0.284919	2.22336	0.267437	NaN	NaN	NaN	NaN	NaN	NaN
-0.147021	2.11586	0.433461	-0.271282	2.22492	0.269497	NaN	NaN	NaN	NaN	NaN	NaN
-0.10832	2.19561	0.452075	-0.26259	2.23304	0.274527	NaN	NaN	NaN	NaN	NaN	NaN
-0.097311	2.20928	0.462445	-0.249432	2.22211	0.268404	NaN	NaN	NaN	NaN	NaN	NaN
-0.063212	2.28337	0.467871	-0.232151	2.22809	0.270087	NaN	NaN	NaN	NaN	NaN	NaN
-0.062788	2.25515	0.451361	-0.222308	2.2281	0.269445	NaN	NaN	NaN	NaN	NaN	NaN
-0.068987	2.20058	0.440971	-0.219087	2.22428	0.26951	NaN	NaN	NaN	NaN	NaN	NaN
-0.055206	2.21482	0.442904	-0.203454	2.22997	0.271124	NaN	NaN	NaN	NaN	NaN	NaN
-0.06701	2.15529	0.439208	-0.187276	2.23868	0.2712	NaN	NaN	NaN	NaN	NaN	NaN
-0.058669	2.1607	0.446107	-0.184827	2.26227	0.281353	NaN	NaN	NaN	NaN	NaN	NaN
-0.041314	2.14297	0.443217	-0.175081	2.26146	0.291671	NaN	NaN	NaN	NaN	NaN	NaN
-0.017001	2.164	0.447751	-0.173886	2.21729	0.28395	NaN	NaN	NaN	NaN	NaN	NaN
0.008833	2.18312	0.4453	-0.158542	2.22554	0.290132	NaN	NaN	NaN	NaN	NaN	NaN
0.016023	2.17994	0.443056	-0.147085	2.22089	0.288659	NaN	NaN	NaN	NaN	NaN	NaN
0.02812	2.16734	0.442149	-0.119583	2.258	0.289467	NaN	NaN	NaN	NaN	NaN	NaN
0.039418	2.19074	0.447535	-0.101876	2.27658	0.293567	NaN	NaN	NaN	NaN	NaN	NaN
0.046371	2.16925	0.448919	-0.100927	2.26394	0.29113	NaN	NaN	NaN	NaN	NaN	NaN
0.074937	2.22671	0.446187	-0.097809	2.22708	0.289251	NaN	NaN	NaN	NaN	NaN	NaN
0.078724	2.20881	0.439933	-0.086565	2.2324	0.28953	NaN	NaN	NaN	NaN	NaN	NaN
0.095935	2.23163	0.446021	-0.069369	2.22931	0.288311	NaN	NaN	NaN	NaN	NaN	NaN
0.103562	2.21605	0.441097	-0.053976	2.23643	0.291659	NaN	NaN	NaN	NaN	NaN	NaN
0.112806	2.2164	0.445789	-0.038726	2.23952	0.288916	NaN	NaN	NaN	NaN	NaN	NaN
0.131954	2.25242	0.45376	-0.037129	2.24081	0.291737	NaN	NaN	NaN	NaN	NaN	NaN
0.138877	2.23014	0.449408	-0.024574	2.24048	0.292153	NaN	NaN	NaN	NaN	NaN	NaN
0.149485	2.23902	0.449356	-0.00836	2.26531	0.299424	NaN	NaN	NaN	NaN	NaN	NaN
0.160676	2.20567	0.447073	-0.003542	2.25203	0.295506	NaN	NaN	NaN	NaN	NaN	NaN
0.17862	2.21089	0.443492	0.022702	2.26876	0.299885	NaN	NaN	NaN	NaN	NaN	NaN
0.203227	2.25052	0.456133	0.022512	2.25386	0.296407	NaN	NaN	NaN	NaN	NaN	NaN
0.228362	2.28716	0.467852	0.037705	2.27113	0.30117	NaN	NaN	NaN	NaN	NaN	NaN
0.221988	2.24277	0.463028	0.057492	2.29876	0.311754	NaN	NaN	NaN	NaN	NaN	NaN
0.230223	2.23563	0.465348	0.078641	2.30979	0.313286	NaN	NaN	NaN	NaN	NaN	NaN
0.23849	2.23717	0.460066	0.081199	2.27535	0.301937	NaN	NaN	NaN	NaN	NaN	NaN
0.251289	2.24425	0.466272	0.101786	2.30227	0.310933	NaN	NaN	NaN	NaN	NaN	NaN
0.251096	2.21068	0.460519	0.103788	2.27141	0.310637	NaN	NaN	NaN	NaN	NaN	NaN
0.2777	2.2667	0.466993	0.11074	2.2394	0.311121	NaN	NaN	NaN	NaN	NaN	NaN
0.270033	2.2162	0.463432	0.124451	2.23654	0.310323	NaN	NaN	NaN	NaN	NaN	NaN
0.290032	2.2252	0.466597	0.141443	2.31114	0.315405	NaN	NaN	NaN	NaN	NaN	NaN
0.312613	2.23584	0.469057	0.156502	2.36341	0.316738	NaN	NaN	NaN	NaN	NaN	NaN
0.33111	2.23218	0.467487	0.170483	2.37775	0.314439	NaN	NaN	NaN	NaN	NaN	NaN
0.344736	2.2309	0.466864	0.180129	2.33638	0.313589	NaN	NaN	NaN	NaN	NaN	NaN
0.352777	2.22678	0.467084	0.186957	2.31219	0.313511	NaN	NaN	NaN	NaN	NaN	NaN
0.367573	2.28353	0.478722	0.198157	2.27818	0.313093	NaN	NaN	NaN	NaN	NaN	NaN
0.368884	2.26483	0.474561	0.206615	2.27673	0.31269	NaN	NaN	NaN	NaN	NaN	NaN
0.371908	2.22404	0.460904	0.219772	2.25242	0.31185	NaN	NaN	NaN	NaN	NaN	NaN
0.370534	2.19518	0.453955	0.229086	2.25223	0.311805	NaN	NaN	NaN	NaN	NaN	NaN
0.407302	2.27906	0.479456	0.238349	2.27723	0.310846	NaN	NaN	NaN	NaN	NaN	NaN
0.434284	2.31432	0.489188	0.251372	2.29691	0.313997	NaN	NaN	NaN	NaN	NaN	NaN
0.441213	2.31362	0.491379	0.270255	2.32043	0.312575	NaN	NaN	NaN	NaN	NaN	NaN
0.453612	2.31597	0.49141	0.27455	2.28937	0.314047	NaN	NaN	NaN	NaN	NaN	NaN
0.456751	2.27803	0.480977	0.285317	2.27513	0.319736	NaN	NaN	NaN	NaN	NaN	NaN
0.484023	2.31796	0.490163	0.295434	2.24408	0.314254	NaN	NaN	NaN	NaN	NaN	NaN
0.494174	2.32261	0.492196	0.300622	2.25523	0.312396	NaN	NaN	NaN	NaN	NaN	NaN
0.489736	2.28375	0.4819	0.311426	2.25378	0.309549	NaN	NaN	NaN	NaN	NaN	NaN
0.496771	2.28461	0.479045	0.331588	2.29191	0.3235	NaN	NaN	NaN	NaN	NaN	NaN
0.522787	2.31976	0.49222	0.353479	2.3261	0.335324	NaN	NaN	NaN	NaN	NaN	NaN
0.538272	2.32269	0.49186	0.364854	2.33157	0.336271	NaN	NaN	NaN	NaN	NaN	NaN
0.540607	2.31492	0.48882	0.378988	2.29414	0.322829	NaN	NaN	NaN	NaN	NaN	NaN
0.541044	2.2556	0.481518	0.387057	2.28575	0.32088	NaN	NaN	NaN	NaN	NaN	NaN
0.554622	2.24003	0.486176	0.397497	2.26511	0.313053	NaN	NaN	NaN	NaN	NaN	NaN
0.564783	2.25097	0.481704	0.413215	2.28837	0.32039	NaN	NaN	NaN	NaN	NaN	NaN
0.571417	2.25176	0.488916	0.419049	2.27741	0.316775	NaN	NaN	NaN	NaN	NaN	NaN
0.581015	2.25145	0.487582	0.4288	2.26842	0.311924	NaN	NaN	NaN	NaN	NaN	NaN
0.585666	2.23157	0.481863	0.430296	2.26262	0.312622	NaN	NaN	NaN	NaN	NaN	NaN
0.616432	2.28986	0.489129	0.447906	2.29427	0.322288	NaN	NaN	NaN	NaN	NaN	NaN
0.628984	2.3098	0.489236	0.450858	2.28355	0.319343	NaN	NaN	NaN	NaN	NaN	NaN
0.647969	2.33113	0.490988	0.460477	2.26715	0.312444	NaN	NaN	NaN	NaN	NaN	NaN
0.650721	2.28365	0.48927	0.469775	2.27416	0.314602	NaN	NaN	NaN	NaN	NaN	NaN
0.652065	2.2675	0.488834	0.486343	2.29845	0.331818	NaN	NaN	NaN	NaN	NaN	NaN
0.653617	2.23608	0.48299	0.500549	2.31717	0.337941	NaN	NaN	NaN	NaN	NaN	NaN
0.687199	2.291	0.486932	0.51692	2.33172	0.33933	NaN	NaN	NaN	NaN	NaN	NaN
0.705341	2.3259	0.491195	0.532105	2.33774	0.336253	NaN	NaN	NaN	NaN	NaN	NaN
0.717461	2.31695	0.488975	0.552622	2.32356	0.331473	NaN	NaN	NaN	NaN	NaN	NaN
0.722706	2.30235	0.484908	0.548065	2.30327	0.335429	NaN	NaN	NaN	NaN	NaN	NaN
0.726527	2.27834	0.486566	0.550661	2.30339	0.342192	NaN	NaN	NaN	NaN	NaN	NaN
0.73258	2.26337	0.488051	0.553732	2.30039	0.340856	NaN	NaN	NaN	NaN	NaN	NaN
0.742886	2.25942	0.487446	0.563005	2.27261	0.332293	NaN	NaN	NaN	NaN	NaN	NaN
0.761981	2.30595	0.489873	0.575449	2.26287	0.330752	NaN	NaN	NaN	NaN	NaN	NaN
0.785556	2.33841	0.490255	0.592574	2.2736	0.333303	NaN	NaN	NaN	NaN	NaN	NaN
0.791872	2.29148	0.488042	0.6015	2.26429	0.330874	NaN	NaN	NaN	NaN	NaN	NaN
0.795126	2.2634	0.490849	0.621481	2.28757	0.33533	NaN	NaN	NaN	NaN	NaN	NaN
0.802516	2.27203	0.487767	0.634123	2.29571	0.34114	NaN	NaN	NaN	NaN	NaN	NaN
0.810108	2.26442	0.488734	0.648982	2.30652	0.342849	NaN	NaN	NaN	NaN	NaN	NaN
0.816958	2.25544	0.483278	0.647732	2.27169	0.343111	NaN	NaN	NaN	NaN	NaN	NaN
0.828099	2.25803	0.487279	0.65993	2.27767	0.352985	NaN	NaN	NaN	NaN	NaN	NaN
0.844683	2.26775	0.486702	0.667566	2.26948	0.351923	NaN	NaN	NaN	NaN	NaN	NaN
0.857655	2.25858	0.486374	0.68166	2.29169	0.353554	NaN	NaN	NaN	NaN	NaN	NaN
0.863514	2.24936	0.483624	0.685021	2.26148	0.35173	NaN	NaN	NaN	NaN	NaN	NaN
0.877299	2.2638	0.487504	0.702124	2.30309	0.357797	NaN	NaN	NaN	NaN	NaN	NaN
0.898893	2.263	0.488799	0.710088	2.28835	0.350153	NaN	NaN	NaN	NaN	NaN	NaN
0.904626	2.25782	0.489137	0.719636	2.29217	0.354891	NaN	NaN	NaN	NaN	NaN	NaN
0.923207	2.27114	0.487246	0.722721	2.26201	0.349588	NaN	NaN	NaN	NaN	NaN	NaN
0.93038	2.2628	0.488558	0.747149	2.32272	0.365706	NaN	NaN	NaN	NaN	NaN	NaN
0.944374	2.28743	0.490255	0.758549	2.33538	0.372514	NaN	NaN	NaN	NaN	NaN	NaN
0.946748	2.25995	0.485631	0.774463	2.35596	0.375831	NaN	NaN	NaN	NaN	NaN	NaN
0.964413	2.28565	0.48936	0.775437	2.30171	0.362136	NaN	NaN	NaN	NaN	NaN	NaN
0.974848	2.27172	0.488555	0.787831	2.29021	0.353532	NaN	NaN	NaN	NaN	NaN	NaN
0.988105	2.28248	0.489308	0.799142	2.28492	0.354538	NaN	NaN	NaN	NaN	NaN	NaN
0.996058	2.273	0.489829	0.812749	2.28717	0.351777	NaN	NaN	NaN	NaN	NaN	NaN
1.00397	2.27483	0.486994	0.818015	2.28373	0.354551	NaN	NaN	NaN	NaN	NaN	NaN
1.01804	2.26597	0.487468	0.837769	2.29367	0.35282	NaN	NaN	NaN	NaN	NaN	NaN
1.02559	2.28482	0.49512	0.842001	2.26054	0.352805	NaN	NaN	NaN	NaN	NaN	NaN
1.03584	2.2813	0.489511	0.868345	2.31221	0.358759	NaN	NaN	NaN	NaN	NaN	NaN
1.04609	2.28109	0.489819	0.880139	2.31522	0.365004	NaN	NaN	NaN	NaN	NaN	NaN
1.06175	2.28662	0.489586	0.899182	2.35964	0.376015	NaN	NaN	NaN	NaN	NaN	NaN
1.08227	2.31221	0.50077	0.900564	2.35474	0.376262	NaN	NaN	NaN	NaN	NaN	NaN
1.09592	2.33551	0.509824	0.906844	2.35098	0.372051	NaN	NaN	NaN	NaN	NaN	NaN
1.09391	2.31311	0.506469	0.91568	2.34577	0.373551	NaN	NaN	NaN	NaN	NaN	NaN
1.11941	2.35241	0.509817	0.930269	2.36327	0.375768	NaN	NaN	NaN	NaN	NaN	NaN
1.12156	2.30314	0.495943	0.938182	2.35121	0.374216	NaN	NaN	NaN	NaN	NaN	NaN
1.12417	2.24405	0.487894	0.956927	2.35609	0.375669	NaN	NaN	NaN	NaN	NaN	NaN
1.12916	2.20958	0.485286	0.974055	2.36778	0.376835	NaN	NaN	NaN	NaN	NaN	NaN
1.14661	2.21368	0.486748	0.975307	2.35714	0.375268	NaN	NaN	NaN	NaN	NaN	NaN
1.17349	2.25274	0.488328	0.984893	2.36048	0.374669	NaN	NaN	NaN	NaN	NaN	NaN
1.18014	2.21425	0.486052	0.98968	2.32857	0.363539	NaN	NaN	NaN	NaN	NaN	NaN
1.19735	2.22574	0.489593	1.00756	2.35345	0.374203	NaN	NaN	NaN	NaN	NaN	NaN
1.20472	2.26324	0.50007	1.02293	2.36223	0.374969	NaN	NaN	NaN	NaN	NaN	NaN
1.21717	2.27317	0.504543	1.03306	2.3529	0.374053	NaN	NaN	NaN	NaN	NaN	NaN
1.23023	2.28222	0.510043	1.03897	2.33848	0.375885	NaN	NaN	NaN	NaN	NaN	NaN
1.24793	2.30992	0.511025	1.04981	2.34298	0.373603	NaN	NaN	NaN	NaN	NaN	NaN
1.2547	2.29734	0.509796	1.06608	2.37266	0.377441	NaN	NaN	NaN	NaN	NaN	NaN
1.26675	2.30232	0.50991	1.07187	2.35885	0.374441	NaN	NaN	NaN	NaN	NaN	NaN
1.27548	2.30146	0.509773	1.08455	2.33915	0.375177	NaN	NaN	NaN	NaN	NaN	NaN
1.26991	2.29366	0.509286	1.10247	2.35296	0.375686	NaN	NaN	NaN	NaN	NaN	NaN
1.27239	2.28289	0.505067	1.12236	2.36369	0.375539	NaN	NaN	NaN	NaN	NaN	NaN
1.29756	2.31164	0.507605	1.11822	2.32872	0.375251	NaN	NaN	NaN	NaN	NaN	NaN
1.31315	2.29201	0.508102	1.12153	2.31044	0.373082	NaN	NaN	NaN	NaN	NaN	NaN
1.32586	2.28671	0.50884	1.12505	2.29228	0.373058	NaN	NaN	NaN	NaN	NaN	NaN
1.33974	2.28784	0.50824	1.13843	2.3158	0.376539	NaN	NaN	NaN	NaN	NaN	NaN
1.35211	2.28601	0.510581	1.15583	2.32774	0.385444	NaN	NaN	NaN	NaN	NaN	NaN
1.3714	2.31253	0.512236	1.17856	2.37346	0.394026	NaN	NaN	NaN	NaN	NaN	NaN
1.38256	2.30252	0.509495	1.18979	2.36885	0.396156	NaN	NaN	NaN	NaN	NaN	NaN
1.39051	2.29307	0.510043	1.18952	2.32759	0.382492	NaN	NaN	NaN	NaN	NaN	NaN
1.39332	2.31172	0.510409	1.21069	2.35002	0.386394	NaN	NaN	NaN	NaN	NaN	NaN
1.39337	2.29812	0.508157	1.2244	2.37062	0.397793	NaN	NaN	NaN	NaN	NaN	NaN
1.39758	2.29706	0.505951	1.23605	2.38124	0.394757	NaN	NaN	NaN	NaN	NaN	NaN
1.41379	2.29828	0.505521	1.24547	2.37238	0.39642	NaN	NaN	NaN	NaN	NaN	NaN
1.42367	2.28635	0.507281	1.25709	2.37734	0.395667	NaN	NaN	NaN	NaN	NaN	NaN
1.43157	2.28866	0.507231	1.26123	2.3437	0.386781	NaN	NaN	NaN	NaN	NaN	NaN
1.45045	2.3025	0.511464	1.28023	2.37369	0.394572	NaN	NaN	NaN	NaN	NaN	NaN
1.46167	2.31162	0.509659	1.29729	2.38473	0.395903	NaN	NaN	NaN	NaN	NaN	NaN
1.46462	2.29041	0.507535	1.302	2.37634	0.396979	NaN	NaN	NaN	NaN	NaN	NaN
1.47899	2.30661	0.511304	1.3119	2.37787	0.395936	NaN	NaN	NaN	NaN	NaN	NaN
1.48796	2.29778	0.508618	1.32568	2.38549	0.399466	NaN	NaN	NaN	NaN	NaN	NaN
1.51293	2.32281	0.512088	1.33353	2.38052	0.394363	NaN	NaN	NaN	NaN	NaN	NaN
1.52478	2.31202	0.513075	1.34112	2.3809	0.397878	NaN	NaN	NaN	NaN	NaN	NaN
1.53737	2.29254	0.505136	1.35204	2.37796	0.393982	NaN	NaN	NaN	NaN	NaN	NaN
1.54049	2.26907	0.509315	1.36668	2.38665	0.399432	NaN	NaN	NaN	NaN	NaN	NaN
1.54577	2.24731	0.506636	1.37891	2.39176	0.398834	NaN	NaN	NaN	NaN	NaN	NaN
1.56453	2.28085	0.509537	1.38328	2.37416	0.394918	NaN	NaN	NaN	NaN	NaN	NaN
1.56708	2.2758	0.505671	1.39985	2.39343	0.398022	NaN	NaN	NaN	NaN	NaN	NaN
1.58913	2.3271	0.512732	1.41171	2.38182	0.397883	NaN	NaN	NaN	NaN	NaN	NaN
1.59813	2.30092	0.508119	1.42567	2.3814	0.396514	NaN	NaN	NaN	NaN	NaN	NaN
1.6182	2.32613	0.512835	1.44131	2.38778	0.395884	NaN	NaN	NaN	NaN	NaN	NaN
1.61428	2.24123	0.508459	1.44974	2.39035	0.399078	NaN	NaN	NaN	NaN	NaN	NaN
1.63292	2.28027	0.509622	1.45844	2.37814	0.394119	NaN	NaN	NaN	NaN	NaN	NaN
1.63679	2.25922	0.513268	1.46643	2.39558	0.399807	NaN	NaN	NaN	NaN	NaN	NaN
1.6448	2.24119	0.506463	1.48906	2.38041	0.394109	NaN	NaN	NaN	NaN	NaN	NaN
1.66213	2.2873	0.511475	1.48571	2.35969	0.398521	NaN	NaN	NaN	NaN	NaN	NaN
1.665	2.25578	0.506974	1.48482	2.32369	0.393706	NaN	NaN	NaN	NaN	NaN	NaN
1.6724	2.24699	0.510038	1.49045	2.32224	0.396186	NaN	NaN	NaN	NaN	NaN	NaN
1.67835	2.2119	0.503955	1.52281	2.36264	0.395621	NaN	NaN	NaN	NaN	NaN	NaN
1.70222	2.27496	0.51671	1.5379	2.4006	0.400647	NaN	NaN	NaN	NaN	NaN	NaN
1.71693	2.27256	0.505574	1.55208	2.38803	0.394146	NaN	NaN	NaN	NaN	NaN	NaN
1.72419	2.24133	0.505048	1.56832	2.4069	0.401187	NaN	NaN	NaN	NaN	NaN	NaN
1.74835	2.26049	0.510855	1.57674	2.39389	0.397836	NaN	NaN	NaN	NaN	NaN	NaN
1.75913	2.26182	0.511698	1.58734	2.36022	0.38653	NaN	NaN	NaN	NaN	NaN	NaN
1.77212	2.25704	0.509972	1.59858	2.34263	0.377868	NaN	NaN	NaN	NaN	NaN	NaN
1.78793	2.27079	0.509931	1.60504	2.33812	0.378806	NaN	NaN	NaN	NaN	NaN	NaN
1.7915	2.25896	0.511056	1.60372	2.33715	0.37718	NaN	NaN	NaN	NaN	NaN	NaN
1.80061	2.2652	0.509175	1.61085	2.34143	0.376735	NaN	NaN	NaN	NaN	NaN	NaN
1.81153	2.25914	0.510951	1.63277	2.33946	0.378002	NaN	NaN	NaN	NaN	NaN	NaN
1.81866	2.25189	0.50657	1.64774	2.35657	0.38523	NaN	NaN	NaN	NaN	NaN	NaN
1.83059	2.2596	0.511631	1.6558	2.34835	0.382175	NaN	NaN	NaN	NaN	NaN	NaN
1.84165	2.25973	0.504872	1.66123	2.32819	0.37526	NaN	NaN	NaN	NaN	NaN	NaN
1.85168	2.25344	0.507028	1.67772	2.35848	0.380059	NaN	NaN	NaN	NaN	NaN	NaN
1.86628	2.28339	0.511199	1.67911	2.29489	0.373809	NaN	NaN	NaN	NaN	NaN	NaN
1.87011	2.24821	0.506203	1.68939	2.27729	0.377395	NaN	NaN	NaN	NaN	NaN	NaN
1.89235	2.28205	0.511557	1.70065	2.27973	0.376714	NaN	NaN	NaN	NaN	NaN	NaN
1.90437	2.25248	0.506784	1.70703	2.2664	0.374288	NaN	NaN	NaN	NaN	NaN	NaN
1.91943	2.27191	0.51232	1.72069	2.28769	0.377253	NaN	NaN	NaN	NaN	NaN	NaN
1.92777	2.24836	0.510092	1.72749	2.27192	0.373802	NaN	NaN	NaN	NaN	NaN	NaN
1.94555	2.26117	0.510601	1.74027	2.29018	0.3782	NaN	NaN	NaN	NaN	NaN	NaN
1.96649	2.29339	0.514936	1.74601	2.27664	0.374733	NaN	NaN	NaN	NaN	NaN	NaN
1.96574	2.26429	0.512118	1.75943	2.29075	0.378332	NaN	NaN	NaN	NaN	NaN	NaN
1.98155	2.27934	0.508835	1.77617	2.29923	0.38428	NaN	NaN	NaN	NaN	NaN	NaN
1.98696	2.25057	0.506387	1.79018	2.29626	0.379021	NaN	NaN	NaN	NaN	NaN	NaN
1.99653	2.27341	0.512684	1.79973	2.28338	0.378795	NaN	NaN	NaN	NaN	NaN	NaN
2.00066	2.26769	0.506227	1.81157	2.29252	0.377749	NaN	NaN	NaN	NaN	NaN	NaN
2.00699	2.28744	0.50874	1.82056	2.28896	0.378303	NaN	NaN	NaN	NaN	NaN	NaN
2.00997	2.25336	0.511043	1.83268	2.29054	0.37735	NaN	NaN	NaN	NaN	NaN	NaN
2.03502	2.29943	0.517824	1.85751	2.31567	0.376806	NaN	NaN	NaN	NaN	NaN	NaN
2.04471	2.27856	0.512271	1.8715	2.30435	0.378791	NaN	NaN	NaN	NaN	NaN	NaN
2.06128	2.28791	0.512707	1.8865	2.28708	0.377529	NaN	NaN	NaN	NaN	NaN	NaN
2.07414	2.27718	0.512765	1.89936	2.32421	0.378439	NaN	NaN	NaN	NaN	NaN	NaN
2.08051	2.28625	0.511571	1.9049	2.29399	0.376833	NaN	NaN	NaN	NaN	NaN	NaN
2.08446	2.26448	0.508137	1.92089	2.29395	0.375236	NaN	NaN	NaN	NaN	NaN	NaN
2.09608	2.26849	0.516485	1.92115	2.30802	0.381251	NaN	NaN	NaN	NaN	NaN	NaN
2.10413	2.25982	0.508654	1.92734	2.27302	0.371641	NaN	NaN	NaN	NaN	NaN	NaN
2.12282	2.30416	0.513951	1.94626	2.29347	0.377214	NaN	NaN	NaN	NaN	NaN	NaN
2.12634	2.25811	0.507071	1.95381	2.31049	0.374076	NaN	NaN	NaN	NaN	NaN	NaN
2.14179	2.28205	0.512963	1.96805	2.32932	0.379651	NaN	NaN	NaN	NaN	NaN	NaN
2.14936	2.2855	0.509043	1.97067	2.29463	0.376138	NaN	NaN	NaN	NaN	NaN	NaN
2.15277	2.27367	0.507713	1.98537	2.31475	0.379075	NaN	NaN	NaN	NaN	NaN	NaN
2.15393	2.25162	0.507415	1.99035	2.28732	0.376195	NaN	NaN	NaN	NaN	NaN	NaN
2.16418	2.27323	0.509319	2.0047	2.30958	0.378987	NaN	NaN	NaN	NaN	NaN	NaN
2.18855	2.29354	0.511277	2.00724	2.29702	0.378004	NaN	NaN	NaN	NaN	NaN	NaN
2.20016	2.28666	0.513918	2.01745	2.29938	0.376569	NaN	NaN	NaN	NaN	NaN	NaN
2.2183	2.30108	0.513321	2.03382	2.31071	0.378939	NaN	NaN	NaN	NaN	NaN	NaN
2.22275	2.28159	0.512242	2.03972	2.29186	0.377107	NaN	NaN	NaN	NaN	NaN	NaN
2.23609	2.29388	0.512612	2.04972	2.30541	0.377337	NaN	NaN	NaN	NaN	NaN	NaN
2.242	2.28814	0.513073	2.05803	2.30307	0.378458	NaN	NaN	NaN	NaN	NaN	NaN
2.25884	2.30251	0.514464	2.08465	2.34827	0.381028	NaN	NaN	NaN	NaN	NaN	NaN
2.27831	2.31237	0.514662	2.09915	2.35961	0.377213	NaN	NaN	NaN	NaN	NaN	NaN
2.287	2.28479	0.513873	2.11427	2.37184	0.38138	NaN	NaN	NaN	NaN	NaN	NaN
2.30513	2.30776	0.514112	2.1287	2.36675	0.377803	NaN	NaN	NaN	NaN	NaN	NaN
2.30791	2.29985	0.516269	2.12871	2.34393	0.381303	NaN	NaN	NaN	NaN	NaN	NaN
2.31533	2.29461	0.508854	2.13159	2.32019	0.380232	NaN	NaN	NaN	NaN	NaN	NaN
2.31814	2.29	0.510233	2.1354	2.29422	0.376452	NaN	NaN	NaN	NaN	NaN	NaN
2.32637	2.28944	0.509329	2.15593	2.34972	0.380889	NaN	NaN	NaN	NaN	NaN	NaN
2.33034	2.2884	0.510607	2.17723	2.3718	0.380919	NaN	NaN	NaN	NaN	NaN	NaN
2.34865	2.3015	0.512845	2.18938	2.36982	0.380407	NaN	NaN	NaN	NaN	NaN	NaN
2.36055	2.29887	0.513286	2.20229	2.38617	0.38165	NaN	NaN	NaN	NaN	NaN	NaN
2.36645	2.28198	0.509422	2.20754	2.37053	0.380123	NaN	NaN	NaN	NaN	NaN	NaN
2.38156	2.2763	0.504615	2.21946	2.38722	0.381607	NaN	NaN	NaN	NaN	NaN	NaN
2.39595	2.31116	0.518455	2.2384	2.41396	0.383009	NaN	NaN	NaN	NaN	NaN	NaN
2.4106	2.30724	0.513252	2.24295	2.35371	0.371142	NaN	NaN	NaN	NaN	NaN	NaN
2.42348	2.3024	0.508592	2.25018	2.35214	0.379286	NaN	NaN	NaN	NaN	NaN	NaN
2.42705	2.26747	0.504212	2.26234	2.35126	0.377797	NaN	NaN	NaN	NaN	NaN	NaN
2.44079	2.29644	0.508665	2.27927	2.39396	0.383386	NaN	NaN	NaN	NaN	NaN	NaN
2.45811	2.31395	0.515841	2.2859	2.38008	0.380388	NaN	NaN	NaN	NaN	NaN	NaN
2.46305	2.29116	0.508913	2.29976	2.4033	0.383769	NaN	NaN	NaN	NaN	NaN	NaN
2.47278	2.28602	0.51344	2.30419	2.36974	0.378996	NaN	NaN	NaN	NaN	NaN	NaN
2.49214	2.30674	0.515103	2.31718	2.36637	0.373077	NaN	NaN	NaN	NaN	NaN	NaN
2.51026	2.32397	0.516508	2.32629	2.37241	0.379589	NaN	NaN	NaN	NaN	NaN	NaN
2.52151	2.30731	0.515256	2.34406	2.39244	0.381109	NaN	NaN	NaN	NaN	NaN	NaN
2.52771	2.28798	0.504438	2.35443	2.37953	0.381069	NaN	NaN	NaN	NaN	NaN	NaN
2.541	2.292	0.50964	2.38151	2.39637	0.381585	NaN	NaN	NaN	NaN	NaN	NaN
2.54955	2.30453	0.512632	2.37156	2.36382	0.373065	NaN	NaN	NaN	NaN	NaN	NaN
2.5559	2.30899	0.514647	2.38824	2.39112	0.379685	NaN	NaN	NaN	NaN	NaN	NaN
2.56229	2.29617	0.505294	2.39376	2.384	0.381557	NaN	NaN	NaN	NaN	NaN	NaN
2.57782	2.32535	0.515128	2.40512	2.40025	0.383195	NaN	NaN	NaN	NaN	NaN	NaN
2.58107	2.29517	0.51087	2.42072	2.38191	0.380438	NaN	NaN	NaN	NaN	NaN	NaN
2.59536	2.30056	0.505834	2.43656	2.4108	0.385186	NaN	NaN	NaN	NaN	NaN	NaN
2.60697	2.31698	0.514914	2.42829	2.33211	0.362879	NaN	NaN	NaN	NaN	NaN	NaN
2.6195	2.32249	0.512056	2.44131	2.34086	0.361275	NaN	NaN	NaN	NaN	NaN	NaN
2.62581	2.3156	0.514966	2.4468	2.31921	0.359914	NaN	NaN	NaN	NaN	NaN	NaN
2.63882	2.31539	0.511547	2.47273	2.37313	0.372972	NaN	NaN	NaN	NaN	NaN	NaN
2.64773	2.32354	0.516605	2.48842	2.38094	0.384459	NaN	NaN	NaN	NaN	NaN	NaN
2.66352	2.31812	0.512419	2.50305	2.3913	0.386239	NaN	NaN	NaN	NaN	NaN	NaN
2.66983	2.25702	0.495317	2.51797	2.40215	0.38215	NaN	NaN	NaN	NaN	NaN	NaN
2.68311	2.25361	0.493856	2.52405	2.40153	0.384426	NaN	NaN	NaN	NaN	NaN	NaN
2.6972	2.24834	0.491609	2.5355	2.40226	0.381276	NaN	NaN	NaN	NaN	NaN	NaN
2.70606	2.27035	0.498811	2.53045	2.34806	0.365044	NaN	NaN	NaN	NaN	NaN	NaN
2.71681	2.26565	0.494184	2.53869	2.30873	0.360622	NaN	NaN	NaN	NaN	NaN	NaN
2.72466	2.24216	0.489201	2.55172	2.31098	0.358942	NaN	NaN	NaN	NaN	NaN	NaN
2.7412	2.27906	0.497573	2.57265	2.35069	0.364333	NaN	NaN	NaN	NaN	NaN	NaN
2.74352	2.24532	0.490509	2.58366	2.33496	0.360813	NaN	NaN	NaN	NaN	NaN	NaN
2.75934	2.28718	0.496734	2.59811	2.34468	0.363749	NaN	NaN	NaN	NaN	NaN	NaN
2.75967	2.22354	0.491681	2.61481	2.34079	0.361912	NaN	NaN	NaN	NaN	NaN	NaN
2.76583	2.21401	0.494131	2.62305	2.35433	0.365656	NaN	NaN	NaN	NaN	NaN	NaN
2.77315	2.18927	0.490015	2.63279	2.34484	0.360989	NaN	NaN	NaN	NaN	NaN	NaN
2.79207	2.24512	0.495491	2.64602	2.35426	0.364157	NaN	NaN	NaN	NaN	NaN	NaN
2.80445	2.25522	0.492585	2.64887	2.34187	0.362002	NaN	NaN	NaN	NaN	NaN	NaN
2.81895	2.2822	0.496834	2.662	2.35129	0.362502	NaN	NaN	NaN	NaN	NaN	NaN
2.82164	2.25205	0.491231	2.66699	2.31131	0.361589	NaN	NaN	NaN	NaN	NaN	NaN
2.8424	2.28019	0.496366	2.66602	2.29008	0.360907	NaN	NaN	NaN	NaN	NaN	NaN
2.8508	2.28262	0.500298	2.66899	2.28514	0.361653	NaN	NaN	NaN	NaN	NaN	NaN
2.86267	2.27189	0.494146	2.68836	2.28714	0.359889	NaN	NaN	NaN	NaN	NaN	NaN
2.86432	2.22221	0.490341	2.69613	2.2687	0.358437	NaN	NaN	NaN	NaN	NaN	NaN
2.87556	2.20818	0.495311	2.71173	2.28963	0.362179	NaN	NaN	NaN	NaN	NaN	NaN
2.906	2.27795	0.498171	2.72697	2.29073	0.360537	NaN	NaN	NaN	NaN	NaN	NaN
2.91716	2.27436	0.497284	2.73207	2.28671	0.362529	NaN	NaN	NaN	NaN	NaN	NaN
2.93073	2.26939	0.498639	2.74661	2.29748	0.359896	NaN	NaN	NaN	NaN	NaN	NaN
2.92788	2.28152	0.499466	2.7526	2.29481	0.364809	NaN	NaN	NaN	NaN	NaN	NaN
2.93791	2.27837	0.492531	2.76641	2.28851	0.359304	NaN	NaN	NaN	NaN	NaN	NaN
2.93985	2.24307	0.495942	2.77934	2.27088	0.352678	NaN	NaN	NaN	NaN	NaN	NaN
2.94746	2.2104	0.492161	2.78819	2.28039	0.357992	NaN	NaN	NaN	NaN	NaN	NaN
2.9619	2.22319	0.496155	2.80445	2.29424	0.360618	NaN	NaN	NaN	NaN	NaN	NaN
2.96651	2.19839	0.490332	2.81593	2.29793	0.363132	NaN	NaN	NaN	NaN	NaN	NaN
2.98679	2.25388	0.495965	2.82693	2.29751	0.360848	NaN	NaN	NaN	NaN	NaN	NaN
2.9996	2.27856	0.496354	2.83564	2.30181	0.363547	NaN	NaN	NaN	NaN	NaN	NaN
3.01355	2.29175	0.499254	2.85264	2.30353	0.363506	NaN	NaN	NaN	NaN	NaN	NaN
3.01311	2.24127	0.493649	2.85878	2.29299	0.364171	NaN	NaN	NaN	NaN	NaN	NaN
3.02615	2.2268	0.495253	2.87075	2.29355	0.359088	NaN	NaN	NaN	NaN	NaN	NaN
3.03146	2.21209	0.496596	2.8784	2.3002	0.364691	NaN	NaN	NaN	NaN	NaN	NaN
3.04595	2.23191	0.491062	2.89028	2.29036	0.359624	NaN	NaN	NaN	NaN	NaN	NaN
3.06147	2.26277	0.497505	2.9082	2.3244	0.365316	NaN	NaN	NaN	NaN	NaN	NaN
3.07343	2.27065	0.492432	2.91657	2.29213	0.361562	NaN	NaN	NaN	NaN	NaN	NaN
3.09075	2.30333	0.498581	2.92901	2.30601	0.363306	NaN	NaN	NaN	NaN	NaN	NaN
3.09509	2.27596	0.493256	2.94561	2.31184	0.36479	NaN	NaN	NaN	NaN	NaN	NaN
3.1098	2.26959	0.498021	2.9459	2.26979	0.35357	NaN	NaN	NaN	NaN	NaN	NaN
3.12473	2.27375	0.494924	2.95899	2.29357	0.358315	NaN	NaN	NaN	NaN	NaN	NaN
3.1513	2.32141	0.507604	2.9728	2.30179	0.362781	NaN	NaN	NaN	NaN	NaN	NaN
3.17051	2.35098	0.517601	2.98862	2.30239	0.361565	NaN	NaN	NaN	NaN	NaN	NaN
3.1661	2.31735	0.516933	2.99419	2.31064	0.366032	NaN	NaN	NaN	NaN	NaN	NaN
3.16796	2.30126	0.519017	3.00565	2.30334	0.360115	NaN	NaN	NaN	NaN	NaN	NaN
3.17584	2.29434	0.516078	3.00457	2.30233	0.365247	NaN	NaN	NaN	NaN	NaN	NaN
3.19178	2.29187	0.513982	3.0154	2.30348	0.360546	NaN	NaN	NaN	NaN	NaN	NaN
3.19814	2.28621	0.51786	3.0233	2.30643	0.364518	NaN	NaN	NaN	NaN	NaN	NaN
3.20854	2.29107	0.51403	3.03544	2.27603	0.351848	NaN	NaN	NaN	NaN	NaN	NaN
3.22149	2.29863	0.517277	3.04119	2.25012	0.343899	NaN	NaN	NaN	NaN	NaN	NaN
3.23098	2.2845	0.514638	3.06004	2.26179	0.345533	NaN	NaN	NaN	NaN	NaN	NaN
3.23962	2.30782	0.517871	3.06582	2.2713	0.354227	NaN	NaN	NaN	NaN	NaN	NaN
3.24939	2.29208	0.513841	3.08695	2.31571	0.363574	NaN	NaN	NaN	NaN	NaN	NaN
3.27241	2.33313	0.519657	3.09901	2.30813	0.364079	NaN	NaN	NaN	NaN	NaN	NaN
3.27684	2.299	0.518548	3.11478	2.31531	0.363123	NaN	NaN	NaN	NaN	NaN	NaN
3.28879	2.29814	0.514737	3.12232	2.3141	0.365555	NaN	NaN	NaN	NaN	NaN	NaN
3.2941	2.29333	0.517112	3.14466	2.32436	0.364479	NaN	NaN	NaN	NaN	NaN	NaN
3.29732	2.26374	0.504999	3.14816	2.31203	0.36427	NaN	NaN	NaN	NaN	NaN	NaN
3.29932	2.23766	0.497808	3.16165	2.32334	0.363502	NaN	NaN	NaN	NaN	NaN	NaN
3.32006	2.27928	0.498853	3.17056	2.31207	0.36569	NaN	NaN	NaN	NaN	NaN	NaN
3.34194	2.30988	0.495826	3.18225	2.31806	0.363085	NaN	NaN	NaN	NaN	NaN	NaN
3.35503	2.30472	0.500556	3.17872	2.31947	0.365603	NaN	NaN	NaN	NaN	NaN	NaN
3.36281	2.29289	0.501348	3.19156	2.31916	0.362944	NaN	NaN	NaN	NaN	NaN	NaN
3.38109	2.31518	0.501549	3.19829	2.31871	0.366611	NaN	NaN	NaN	NaN	NaN	NaN
3.38954	2.31757	0.50206	3.20677	2.29727	0.353009	NaN	NaN	NaN	NaN	NaN	NaN
3.39554	2.29476	0.501266	3.20819	2.26104	0.346713	NaN	NaN	NaN	NaN	NaN	NaN
3.40475	2.29264	0.495499	3.2197	2.25637	0.341806	NaN	NaN	NaN	NaN	NaN	NaN
3.41937	2.28803	0.499524	3.22686	2.26034	0.344453	NaN	NaN	NaN	NaN	NaN	NaN
3.43316	2.28969	0.494796	3.25604	2.32372	0.363667	NaN	NaN	NaN	NaN	NaN	NaN
3.45199	2.31307	0.500617	3.27118	2.34391	0.372672	NaN	NaN	NaN	NaN	NaN	NaN
3.44775	2.26155	0.494052	3.27564	2.32972	0.363949	NaN	NaN	NaN	NaN	NaN	NaN
3.45826	2.25922	0.499192	3.28058	2.31156	0.362279	NaN	NaN	NaN	NaN	NaN	NaN
3.46417	2.24521	0.497679	3.29578	2.3573	0.370969	NaN	NaN	NaN	NaN	NaN	NaN
3.47332	2.25939	0.501432	3.29989	2.31144	0.363671	NaN	NaN	NaN	NaN	NaN	NaN
3.48065	2.24495	0.493577	3.31409	2.31173	0.357338	NaN	NaN	NaN	NaN	NaN	NaN
3.49828	2.2626	0.499841	3.32292	2.29883	0.356537	NaN	NaN	NaN	NaN	NaN	NaN
3.50917	2.24947	0.499979	3.34348	2.33929	0.367215	NaN	NaN	NaN	NaN	NaN	NaN
3.52662	2.26631	0.500412	3.3533	2.32233	0.363799	NaN	NaN	NaN	NaN	NaN	NaN
3.52455	2.29539	0.511486	3.36708	2.34758	0.367845	NaN	NaN	NaN	NaN	NaN	NaN
3.54184	2.31632	0.515281	3.37545	2.34094	0.36979	NaN	NaN	NaN	NaN	NaN	NaN
3.55385	2.30699	0.516934	3.37994	2.2984	0.363323	NaN	NaN	NaN	NaN	NaN	NaN
3.57071	2.26929	0.504934	3.39161	2.3156	0.366177	NaN	NaN	NaN	NaN	NaN	NaN
3.58153	2.2551	0.499665	3.40704	2.3081	0.356006	NaN	NaN	NaN	NaN	NaN	NaN
3.59679	2.25761	0.499473	3.41245	2.30174	0.356027	NaN	NaN	NaN	NaN	NaN	NaN
3.61286	2.27148	0.499806	3.42655	2.33127	0.36249	NaN	NaN	NaN	NaN	NaN	NaN
3.62053	2.25721	0.499574	3.43124	2.29685	0.363402	NaN	NaN	NaN	NaN	NaN	NaN
3.61891	2.27248	0.501637	3.43852	2.28313	0.365803	NaN	NaN	NaN	NaN	NaN	NaN
3.61609	2.25669	0.497323	3.44236	2.26084	0.361481	NaN	NaN	NaN	NaN	NaN	NaN
3.62183	2.25275	0.498214	3.46473	2.31601	0.367918	NaN	NaN	NaN	NaN	NaN	NaN
3.64608	2.29002	0.505912	3.47491	2.32986	0.364821	NaN	NaN	NaN	NaN	NaN	NaN
3.65958	2.22908	0.501565	3.48732	2.34721	0.367653	NaN	NaN	NaN	NaN	NaN	NaN
3.66997	2.19722	0.499864	3.49432	2.3319	0.36497	NaN	NaN	NaN	NaN	NaN	NaN
3.68158	2.21035	0.499313	3.50705	2.35191	0.368075	NaN	NaN	NaN	NaN	NaN	NaN
3.68481	2.18753	0.493902	3.51476	2.33851	0.365846	NaN	NaN	NaN	NaN	NaN	NaN
3.70117	2.25139	0.511373	3.52796	2.3618	0.371749	NaN	NaN	NaN	NaN	NaN	NaN
3.71231	2.26222	0.519329	3.53362	2.33545	0.365051	NaN	NaN	NaN	NaN	NaN	NaN
3.72279	2.26155	0.515928	3.54596	2.35001	0.368185	NaN	NaN	NaN	NaN	NaN	NaN
3.7376	2.30099	0.521083	3.55551	2.34451	0.366982	NaN	NaN	NaN	NaN	NaN	NaN
3.74185	2.26725	0.514448	3.57083	2.34766	0.365673	NaN	NaN	NaN	NaN	NaN	NaN
3.74556	2.26071	0.518542	3.57657	2.3424	0.367612	NaN	NaN	NaN	NaN	NaN	NaN
3.75292	2.26408	0.516223	3.60084	2.36042	0.366827	NaN	NaN	NaN	NaN	NaN	NaN
3.77042	2.33857	0.522953	3.60616	2.36144	0.370676	NaN	NaN	NaN	NaN	NaN	NaN
3.78355	2.34032	0.519606	3.61296	2.31686	0.353456	NaN	NaN	NaN	NaN	NaN	NaN
3.78985	2.33159	0.521506	3.6144	2.27986	0.347708	NaN	NaN	NaN	NaN	NaN	NaN
3.79725	2.29721	0.516939	3.62839	2.28943	0.344845	NaN	NaN	NaN	NaN	NaN	NaN
3.80699	2.31101	0.521366	3.62286	2.25213	0.346152	NaN	NaN	NaN	NaN	NaN	NaN
3.8183	2.31552	0.517132	3.62438	2.223	0.344272	NaN	NaN	NaN	NaN	NaN	NaN
3.83575	2.35351	0.521644	3.63475	2.21814	0.342919	NaN	NaN	NaN	NaN	NaN	NaN
3.8428	2.33681	0.519534	3.65225	2.2441	0.34942	NaN	NaN	NaN	NaN	NaN	NaN
3.85493	2.32072	0.521352	3.66642	2.2211	0.345117	NaN	NaN	NaN	NaN	NaN	NaN
3.87044	2.31675	0.516881	3.68663	2.25703	0.346246	NaN	NaN	NaN	NaN	NaN	NaN
3.87639	2.33631	0.521484	3.70499	2.24505	0.345919	NaN	NaN	NaN	NaN	NaN	NaN
3.88873	2.33731	0.517942	3.71067	2.22546	0.34515	NaN	NaN	NaN	NaN	NaN	NaN
3.89507	2.3396	0.521279	3.7267	2.22038	0.343316	NaN	NaN	NaN	NaN	NaN	NaN
3.90944	2.34703	0.519448	3.7411	2.23373	0.346187	NaN	NaN	NaN	NaN	NaN	NaN
3.90546	2.31306	0.521967	3.75701	2.26539	0.346367	NaN	NaN	NaN	NaN	NaN	NaN
3.90774	2.27287	0.517866	3.75676	2.23209	0.343524	NaN	NaN	NaN	NaN	NaN	NaN
3.91554	2.27345	0.520225	3.76878	2.24112	0.347233	NaN	NaN	NaN	NaN	NaN	NaN
3.93003	2.27776	0.517722	3.77199	2.22456	0.344348	NaN	NaN	NaN	NaN	NaN	NaN
3.94686	2.31702	0.521465	3.78819	2.26786	0.345352	NaN	NaN	NaN	NaN	NaN	NaN
3.95759	2.33521	0.51882	3.79654	2.30532	0.348147	NaN	NaN	NaN	NaN	NaN	NaN
3.96967	2.35994	0.521789	3.80697	2.33151	0.348438	NaN	NaN	NaN	NaN	NaN	NaN
3.9776	2.30922	0.519078	3.81407	2.31184	0.350773	NaN	NaN	NaN	NaN	NaN	NaN
3.97826	2.28174	0.520651	3.81895	2.29677	0.347637	NaN	NaN	NaN	NaN	NaN	NaN
3.99562	2.30741	0.50886	3.82638	2.29587	0.347122	NaN	NaN	NaN	NaN	NaN	NaN
4.00263	2.28981	0.501689	3.84347	2.30619	0.347771	NaN	NaN	NaN	NaN	NaN	NaN
4.01458	2.28471	0.498165	3.85932	2.29788	0.347609	NaN	NaN	NaN	NaN	NaN	NaN
4.0163	2.28301	0.500842	3.85426	2.2974	0.34656	NaN	NaN	NaN	NaN	NaN	NaN
4.02467	2.2869	0.498564	3.87183	2.31311	0.346807	NaN	NaN	NaN	NaN	NaN	NaN
4.02905	2.29673	0.503273	3.87462	2.3082	0.349494	NaN	NaN	NaN	NaN	NaN	NaN
4.03866	2.28726	0.500015	3.88298	2.30498	0.344584	NaN	NaN	NaN	NaN	NaN	NaN
4.03935	2.29115	0.501816	3.8947	2.30005	0.348147	NaN	NaN	NaN	NaN	NaN	NaN
4.05614	2.29011	0.499943	3.91484	2.34237	0.357886	NaN	NaN	NaN	NaN	NaN	NaN
4.0697	2.28805	0.502029	3.92232	2.31206	0.349684	NaN	NaN	NaN	NaN	NaN	NaN
4.08148	2.28576	0.498376	3.93303	2.31705	0.34945	NaN	NaN	NaN	NaN	NaN	NaN
4.08714	2.29404	0.502071	3.93949	2.30719	0.34712	NaN	NaN	NaN	NaN	NaN	NaN
4.10198	2.30036	0.499448	3.94923	2.32936	0.350914	NaN	NaN	NaN	NaN	NaN	NaN
4.10783	2.29574	0.503371	3.95735	2.31564	0.349043	NaN	NaN	NaN	NaN	NaN	NaN
4.12145	2.29642	0.498858	3.96182	2.31996	0.349014	NaN	NaN	NaN	NaN	NaN	NaN
4.12708	2.29232	0.501988	3.97084	2.30948	0.348775	NaN	NaN	NaN	NaN	NaN	NaN
4.14596	2.2967	0.499287	3.98749	2.32422	0.350156	NaN	NaN	NaN	NaN	NaN	NaN
4.15698	2.29482	0.502284	3.99885	2.30765	0.346626	NaN	NaN	NaN	NaN	NaN	NaN
4.17166	2.28575	0.498447	4.01153	2.32526	0.350062	NaN	NaN	NaN	NaN	NaN	NaN
4.18131	2.29876	0.502076	4.01803	2.31227	0.346865	NaN	NaN	NaN	NaN	NaN	NaN
4.19243	2.29878	0.502128	4.0291	2.33326	0.351145	NaN	NaN	NaN	NaN	NaN	NaN
4.20333	2.30466	0.502914	4.0299	2.31045	0.348318	NaN	NaN	NaN	NaN	NaN	NaN
4.20775	2.29745	0.500479	4.04674	2.31769	0.347463	NaN	NaN	NaN	NaN	NaN	NaN
4.21265	2.30696	0.502887	4.05362	2.33138	0.340984	NaN	NaN	NaN	NaN	NaN	NaN
4.21888	2.29221	0.499307	4.05954	2.37086	0.346351	NaN	NaN	NaN	NaN	NaN	NaN
4.23088	2.30656	0.501804	4.07409	2.39336	0.35296	NaN	NaN	NaN	NaN	NaN	NaN
4.23833	2.29967	0.499962	4.08534	2.3868	0.349759	NaN	NaN	NaN	NaN	NaN	NaN
4.25172	2.31561	0.504237	4.09906	2.40494	0.356448	NaN	NaN	NaN	NaN	NaN	NaN
4.25988	2.30148	0.500885	4.09899	2.313	0.337374	NaN	NaN	NaN	NaN	NaN	NaN
4.27457	2.34348	0.503401	4.1068	2.26812	0.329471	NaN	NaN	NaN	NaN	NaN	NaN
4.2881	2.36226	0.501931	4.12731	2.32515	0.330736	NaN	NaN	NaN	NaN	NaN	NaN
4.29939	2.38157	0.504769	4.1371	2.37092	0.331474	NaN	NaN	NaN	NaN	NaN	NaN
4.30713	2.36417	0.502446	4.14133	2.39532	0.333156	NaN	NaN	NaN	NaN	NaN	NaN
4.31739	2.38109	0.504065	4.15846	2.36878	0.331003	NaN	NaN	NaN	NaN	NaN	NaN
4.32289	2.33834	0.493238	4.18229	2.39611	0.341706	NaN	NaN	NaN	NaN	NaN	NaN
4.32388	2.28927	0.484757	4.1959	2.41588	0.33936	NaN	NaN	NaN	NaN	NaN	NaN
4.33488	2.28129	0.47984	4.20981	2.38926	0.329229	NaN	NaN	NaN	NaN	NaN	NaN
4.34992	2.33035	0.485663	4.20036	2.38357	0.32774	NaN	NaN	NaN	NaN	NaN	NaN
4.35565	2.31362	0.481637	4.21266	2.40855	0.334081	NaN	NaN	NaN	NaN	NaN	NaN
4.36737	2.32063	0.483935	4.22021	2.39371	0.331384	NaN	NaN	NaN	NaN	NaN	NaN
4.37174	2.2965	0.480059	4.2325	2.40664	0.334482	NaN	NaN	NaN	NaN	NaN	NaN
4.38804	2.34107	0.485563	4.23982	2.40807	0.332524	NaN	NaN	NaN	NaN	NaN	NaN
4.39447	2.312	0.483468	4.24383	2.40329	0.336767	NaN	NaN	NaN	NaN	NaN	NaN
4.4063	2.32733	0.48448	4.26274	2.4037	0.331878	NaN	NaN	NaN	NaN	NaN	NaN
4.41418	2.31052	0.481786	4.27472	2.41296	0.336005	NaN	NaN	NaN	NaN	NaN	NaN
4.43004	2.35834	0.485084	4.2886	2.40927	0.333284	NaN	NaN	NaN	NaN	NaN	NaN
4.44147	2.37496	0.483178	4.28733	2.4069	0.334186	NaN	NaN	NaN	NaN	NaN	NaN
4.45366	2.39441	0.486218	4.29933	2.40942	0.333781	NaN	NaN	NaN	NaN	NaN	NaN
4.45676	2.35002	0.483287	4.30463	2.38295	0.322999	NaN	NaN	NaN	NaN	NaN	NaN
4.47143	2.3882	0.488003	4.31133	2.34278	0.312465	NaN	NaN	NaN	NaN	NaN	NaN
4.47961	2.37253	0.48288	4.30903	2.29612	0.296812	NaN	NaN	NaN	NaN	NaN	NaN
4.48854	2.40159	0.486796	4.3256	2.31429	0.30183	NaN	NaN	NaN	NaN	NaN	NaN
4.49356	2.35677	0.474353	4.33271	2.2866	0.291181	NaN	NaN	NaN	NaN	NaN	NaN
4.4965	2.33032	0.467327	4.33348	2.2754	0.290092	NaN	NaN	NaN	NaN	NaN	NaN
4.50565	2.31908	0.460934	4.34414	2.325	0.30363	NaN	NaN	NaN	NaN	NaN	NaN
4.51338	2.32924	0.465651	4.36114	2.38756	0.313874	NaN	NaN	NaN	NaN	NaN	NaN
4.53191	2.36448	0.47542	4.36743	2.42523	0.319204	NaN	NaN	NaN	NaN	NaN	NaN
4.5422	2.32818	0.466406	4.38279	2.41147	0.313041	NaN	NaN	NaN	NaN	NaN	NaN
4.54331	2.32805	0.465659	4.39453	2.42504	0.317312	NaN	NaN	NaN	NaN	NaN	NaN
4.55799	2.33153	0.463353	4.40622	2.41471	0.315523	NaN	NaN	NaN	NaN	NaN	NaN
4.56204	2.33501	0.466522	4.41213	2.36104	0.304912	NaN	NaN	NaN	NaN	NaN	NaN
4.57706	2.3316	0.463434	4.42648	2.35305	0.303342	NaN	NaN	NaN	NaN	NaN	NaN
4.58178	2.33666	0.466077	4.43309	2.36142	0.295875	NaN	NaN	NaN	NaN	NaN	NaN
4.59184	2.30217	0.454839	4.44246	2.35662	0.293509	NaN	NaN	NaN	NaN	NaN	NaN
4.59042	2.30643	0.447182	4.4442	2.36668	0.294986	NaN	NaN	NaN	NaN	NaN	NaN
4.598	2.32179	0.45661	4.44261	2.34203	0.291092	NaN	NaN	NaN	NaN	NaN	NaN
4.6177	2.36553	0.465952	4.45637	2.3938	0.293628	NaN	NaN	NaN	NaN	NaN	NaN
4.62158	2.3543	0.467909	4.47517	2.42041	0.29528	NaN	NaN	NaN	NaN	NaN	NaN
4.62157	2.29573	0.453485	4.48379	2.42397	0.2974	NaN	NaN	NaN	NaN	NaN	NaN
4.63171	2.31313	0.44678	4.49489	2.39641	0.295754	NaN	NaN	NaN	NaN	NaN	NaN
4.648	2.38232	0.458607	4.49396	2.37342	0.287484	NaN	NaN	NaN	NaN	NaN	NaN
4.66626	2.42396	0.470522	4.50339	2.39797	0.28776	NaN	NaN	NaN	NaN	NaN	NaN
4.67858	2.41912	0.472749	4.50709	2.40357	0.288342	NaN	NaN	NaN	NaN	NaN	NaN
4.67766	2.34448	0.445263	4.51688	2.33899	0.275923	NaN	NaN	NaN	NaN	NaN	NaN
4.68062	2.3184	0.439367	4.52227	2.33257	0.275132	NaN	NaN	NaN	NaN	NaN	NaN
4.69554	2.35165	0.447249	4.53618	2.30544	0.273373	NaN	NaN	NaN	NaN	NaN	NaN
4.7069	2.37014	0.446168	4.54915	2.33362	0.276152	NaN	NaN	NaN	NaN	NaN	NaN
4.71625	2.36021	0.44873	4.5673	2.34842	0.275149	NaN	NaN	NaN	NaN	NaN	NaN
4.71232	2.31482	0.436529	4.57784	2.41009	0.278636	NaN	NaN	NaN	NaN	NaN	NaN
4.71434	2.27005	0.424362	4.59027	2.43503	0.276478	NaN	NaN	NaN	NaN	NaN	NaN
4.73474	2.3609	0.429071	4.59705	2.45465	0.280415	NaN	NaN	NaN	NaN	NaN	NaN
4.75217	2.37853	0.43773	4.60628	2.43604	0.278182	NaN	NaN	NaN	NaN	NaN	NaN
4.76301	2.37838	0.435572	4.60042	2.41061	0.279194	NaN	NaN	NaN	NaN	NaN	NaN
4.77093	2.36702	0.432029	4.61908	2.41183	0.277102	NaN	NaN	NaN	NaN	NaN	NaN
4.77534	2.367	0.432648	4.63641	2.44782	0.280311	NaN	NaN	NaN	NaN	NaN	NaN
4.77902	2.34855	0.427796	4.63556	2.41741	0.281914	NaN	NaN	NaN	NaN	NaN	NaN
4.80294	2.40193	0.432826	4.64512	2.39921	0.27621	NaN	NaN	NaN	NaN	NaN	NaN
4.81211	2.4103	0.428297	4.65491	2.41344	0.279569	NaN	NaN	NaN	NaN	NaN	NaN
4.82572	2.40999	0.426987	4.67453	2.44486	0.279602	NaN	NaN	NaN	NaN	NaN	NaN
4.83689	2.40982	0.433273	4.6643	2.41701	0.270355	NaN	NaN	NaN	NaN	NaN	NaN
4.84049	2.40327	0.427625	4.67833	2.41684	0.269431	NaN	NaN	NaN	NaN	NaN	NaN
4.84089	2.40567	0.422951	4.68544	2.391	0.258664	NaN	NaN	NaN	NaN	NaN	NaN
4.84476	2.41874	0.428491	4.68863	2.38577	0.259254	NaN	NaN	NaN	NaN	NaN	NaN
4.84404	2.43126	0.432465	4.70218	2.39705	0.258946	NaN	NaN	NaN	NaN	NaN	NaN
4.85838	2.42432	0.430751	4.70783	2.37565	0.257462	NaN	NaN	NaN	NaN	NaN	NaN
4.85871	2.35873	0.419395	4.72337	2.35882	0.247266	NaN	NaN	NaN	NaN	NaN	NaN
4.87195	2.35918	0.413068	4.72255	2.32193	0.237654	NaN	NaN	NaN	NaN	NaN	NaN
4.89667	2.37776	0.414079	4.73437	2.32385	0.236864	NaN	NaN	NaN	NaN	NaN	NaN
4.90288	2.37337	0.415226	4.73609	2.32441	0.238032	NaN	NaN	NaN	NaN	NaN	NaN
4.91302	2.38216	0.409825	4.74279	2.36385	0.250302	NaN	NaN	NaN	NaN	NaN	NaN
4.91558	2.36246	0.410541	4.77011	2.42412	0.261613	NaN	NaN	NaN	NaN	NaN	NaN
4.92036	2.36736	0.409557	4.77997	2.43709	0.264562	NaN	NaN	NaN	NaN	NaN	NaN
4.92884	2.37118	0.409338	4.78273	2.39813	0.241246	NaN	NaN	NaN	NaN	NaN	NaN
4.93548	2.36021	0.408848	4.77589	2.35034	0.226544	NaN	NaN	NaN	NaN	NaN	NaN
4.94743	2.38157	0.412571	4.78637	2.36289	0.228138	NaN	NaN	NaN	NaN	NaN	NaN
4.95797	2.39445	0.409617	4.78449	2.32685	0.217697	NaN	NaN	NaN	NaN	NaN	NaN
4.96278	2.35483	0.401558	4.79579	2.34211	0.220174	NaN	NaN	NaN	NaN	NaN	NaN
4.96429	2.30073	0.388873	4.79831	2.32852	0.21823	NaN	NaN	NaN	NaN	NaN	NaN
4.97451	2.34818	0.394417	4.80768	2.34293	0.220844	NaN	NaN	NaN	NaN	NaN	NaN
4.98482	2.32161	0.388293	4.81639	2.34276	0.220862	NaN	NaN	NaN	NaN	NaN	NaN
4.99049	2.34961	0.395076	4.82038	2.32949	0.217574	NaN	NaN	NaN	NaN	NaN	NaN
4.99395	2.32329	0.388723	4.83353	2.36449	0.230535	NaN	NaN	NaN	NaN	NaN	NaN
4.99417	2.3038	0.387914	4.85631	2.44378	0.243894	NaN	NaN	NaN	NaN	NaN	NaN
5.01407	2.38003	0.391335	4.86856	2.46854	0.245244	NaN	NaN	NaN	NaN	NaN	NaN
5.0223	2.40487	0.39254	4.87911	2.48635	0.2457	NaN	NaN	NaN	NaN	NaN	NaN
5.02449	2.40121	0.395109	4.8834	2.44651	0.233926	NaN	NaN	NaN	NaN	NaN	NaN
5.03018	2.38228	0.391727	4.89436	2.44813	0.236414	NaN	NaN	NaN	NaN	NaN	NaN
5.04411	2.38906	0.394047	4.90717	2.47506	0.244607	NaN	NaN	NaN	NaN	NaN	NaN
5.05072	2.37544	0.391019	4.90627	2.41179	0.223586	NaN	NaN	NaN	NaN	NaN	NaN
5.06839	2.3928	0.384991	4.91354	2.37864	0.212983	NaN	NaN	NaN	NaN	NaN	NaN
5.08038	2.44482	0.394089	4.92292	2.39116	0.215139	NaN	NaN	NaN	NaN	NaN	NaN
5.08674	2.41813	0.383391	4.92702	2.40878	0.221682	NaN	NaN	NaN	NaN	NaN	NaN
5.08933	2.38257	0.373939	4.93452	2.4036	0.221404	NaN	NaN	NaN	NaN	NaN	NaN
5.10139	2.39737	0.376721	4.93506	2.41465	0.22183	NaN	NaN	NaN	NaN	NaN	NaN
5.11057	2.3853	0.372589	4.95376	2.41858	0.224231	NaN	NaN	NaN	NaN	NaN	NaN
5.11672	2.39769	0.377017	4.96844	2.40731	0.221085	NaN	NaN	NaN	NaN	NaN	NaN
5.1258	2.38733	0.372171	4.97743	2.41271	0.223837	NaN	NaN	NaN	NaN	NaN	NaN
5.12845	2.35933	0.37486	4.98388	2.40698	0.221645	NaN	NaN	NaN	NaN	NaN	NaN
5.12866	2.32575	0.371314	5.00204	2.42012	0.225122	NaN	NaN	NaN	NaN	NaN	NaN
5.13403	2.36066	0.372829	5.01415	2.41274	0.222639	NaN	NaN	NaN	NaN	NaN	NaN
5.1468	2.39492	0.374544	5.0166	2.39018	0.214949	NaN	NaN	NaN	NaN	NaN	NaN
5.16143	2.36129	0.364821	5.02105	2.39697	0.216542	NaN	NaN	NaN	NaN	NaN	NaN
5.17352	2.38965	0.373568	5.02952	2.41792	0.22378	NaN	NaN	NaN	NaN	NaN	NaN
5.18495	2.39536	0.37344	5.03769	2.39424	0.204537	NaN	NaN	NaN	NaN	NaN	NaN
5.18962	2.39583	0.375566	5.04741	2.39201	0.193866	NaN	NaN	NaN	NaN	NaN	NaN
5.19528	2.32902	0.351788	5.05662	2.36989	0.184735	NaN	NaN	NaN	NaN	NaN	NaN
5.20187	2.33281	0.354794	5.05808	2.38538	0.191796	NaN	NaN	NaN	NaN	NaN	NaN
5.21384	2.33812	0.353679	5.05781	2.37826	0.196689	NaN	NaN	NaN	NaN	NaN	NaN
5.22129	2.36121	0.355969	5.06854	2.4006	0.20006	NaN	NaN	NaN	NaN	NaN	NaN
5.23069	2.36822	0.356793	5.07241	2.42959	0.205524	NaN	NaN	NaN	NaN	NaN	NaN
5.23609	2.32545	0.352029	5.0685	2.39591	0.195174	NaN	NaN	NaN	NaN	NaN	NaN
5.24991	2.34878	0.356819	5.08867	2.39735	0.194104	NaN	NaN	NaN	NaN	NaN	NaN
5.25648	2.36056	0.352489	5.0939	2.3654	0.184191	NaN	NaN	NaN	NaN	NaN	NaN
5.26035	2.36826	0.35773	5.09655	2.36675	0.184825	NaN	NaN	NaN	NaN	NaN	NaN
5.26274	2.33955	0.354775	5.11138	2.36574	0.185046	NaN	NaN	NaN	NaN	NaN	NaN
5.27719	2.38249	0.357345	5.11514	2.3644	0.183868	NaN	NaN	NaN	NaN	NaN	NaN
5.28908	2.4019	0.354243	5.13549	2.40305	0.185212	NaN	NaN	NaN	NaN	NaN	NaN
5.29694	2.4192	0.359224	5.14169	2.43505	0.187383	NaN	NaN	NaN	NaN	NaN	NaN
5.30505	2.39486	0.354102	5.14893	2.42343	0.184365	NaN	NaN	NaN	NaN	NaN	NaN
5.31593	2.41011	0.358807	5.17025	2.44494	0.188232	NaN	NaN	NaN	NaN	NaN	NaN
5.31961	2.37396	0.344314	5.17807	2.43497	0.18564	NaN	NaN	NaN	NaN	NaN	NaN
5.3219	2.33768	0.334605	5.17798	2.43654	0.187218	NaN	NaN	NaN	NaN	NaN	NaN
5.33601	2.35616	0.339242	5.18232	2.44541	0.186987	NaN	NaN	NaN	NaN	NaN	NaN
5.34275	2.33852	0.332615	5.19119	2.43004	0.183791	NaN	NaN	NaN	NaN	NaN	NaN
5.35684	2.35938	0.340203	5.20954	2.4015	0.183966	NaN	NaN	NaN	NaN	NaN	NaN
5.36337	2.36329	0.33296	5.2185	2.40858	0.186541	NaN	NaN	NaN	NaN	NaN	NaN
5.37609	2.37685	0.339726	5.22473	2.39811	0.174593	NaN	NaN	NaN	NaN	NaN	NaN
5.37773	2.34133	0.333818	5.22805	2.37554	0.165414	NaN	NaN	NaN	NaN	NaN	NaN
5.37339	2.38078	0.335051	5.22733	2.3453	0.165409	NaN	NaN	NaN	NaN	NaN	NaN
5.38685	2.41737	0.337631	5.2323	2.31869	0.165749	NaN	NaN	NaN	NaN	NaN	NaN
5.39403	2.41757	0.337673	5.24135	2.31067	0.162831	NaN	NaN	NaN	NaN	NaN	NaN
5.40607	2.42036	0.336865	5.25923	2.38719	0.166933	NaN	NaN	NaN	NaN	NaN	NaN
5.41645	2.42313	0.340224	5.26799	2.41274	0.166253	NaN	NaN	NaN	NaN	NaN	NaN
5.42412	2.38019	0.326698	5.27566	2.44963	0.168816	NaN	NaN	NaN	NaN	NaN	NaN
5.42637	2.36982	0.31877	5.28456	2.47898	0.169459	NaN	NaN	NaN	NaN	NaN	NaN
5.43727	2.35811	0.316148	5.28825	2.48038	0.170287	NaN	NaN	NaN	NaN	NaN	NaN
5.44145	2.40144	0.322365	5.30035	2.45982	0.168975	NaN	NaN	NaN	NaN	NaN	NaN
5.44386	2.37049	0.320395	5.30512	2.44211	0.168338	NaN	NaN	NaN	NaN	NaN	NaN
5.4575	2.39445	0.317836	5.31208	2.44219	0.167477	NaN	NaN	NaN	NaN	NaN	NaN
5.47088	2.41902	0.321369	5.32422	2.45433	0.170034	NaN	NaN	NaN	NaN	NaN	NaN
5.48198	2.42982	0.318557	5.33176	2.41086	0.16634	NaN	NaN	NaN	NaN	NaN	NaN
5.48826	2.42644	0.321314	5.3383	2.45106	0.169168	NaN	NaN	NaN	NaN	NaN	NaN
5.50125	2.44157	0.319982	5.346	2.44804	0.168133	NaN	NaN	NaN	NaN	NaN	NaN
5.50842	2.43925	0.323915	5.35029	2.43438	0.162323	NaN	NaN	NaN	NaN	NaN	NaN
5.51283	2.39614	0.317759	5.36045	2.4206	0.158997	NaN	NaN	NaN	NaN	NaN	NaN
5.52562	2.4378	0.322239	5.37109	2.44174	0.165151	NaN	NaN	NaN	NaN	NaN	NaN
5.53262	2.42071	0.318103	5.37995	2.43097	0.160604	NaN	NaN	NaN	NaN	NaN	NaN
5.54012	2.4453	0.322757	5.3851	2.42569	0.159481	NaN	NaN	NaN	NaN	NaN	NaN
5.54637	2.402	0.308441	5.38971	2.44063	0.164812	NaN	NaN	NaN	NaN	NaN	NaN
5.55003	2.37277	0.301401	5.40253	2.4341	0.159881	NaN	NaN	NaN	NaN	NaN	NaN
5.56144	2.36577	0.298169	5.4062	2.43408	0.163313	NaN	NaN	NaN	NaN	NaN	NaN
5.57085	2.38628	0.304985	5.41124	2.47377	0.172229	NaN	NaN	NaN	NaN	NaN	NaN
5.57293	2.32986	0.295112	5.41829	2.43434	0.151633	NaN	NaN	NaN	NaN	NaN	NaN
5.58314	2.37827	0.303812	5.43595	2.46557	0.151803	NaN	NaN	NaN	NaN	NaN	NaN
5.5836	2.35401	0.296529	5.44134	2.50177	0.153439	NaN	NaN	NaN	NaN	NaN	NaN
5.59114	2.3766	0.298464	5.45036	2.4593	0.149759	NaN	NaN	NaN	NaN	NaN	NaN
5.59182	2.35744	0.29725	5.45753	2.46828	0.151826	NaN	NaN	NaN	NaN	NaN	NaN
5.60332	2.3598	0.289405	5.46009	2.47164	0.152909	NaN	NaN	NaN	NaN	NaN	NaN
5.60917	2.33551	0.283276	5.47471	2.39435	0.140156	NaN	NaN	NaN	NaN	NaN	NaN
5.6164	2.30368	0.276697	5.4792	2.37644	0.139252	NaN	NaN	NaN	NaN	NaN	NaN
5.62804	2.324	0.281251	5.48642	2.38108	0.142708	NaN	NaN	NaN	NaN	NaN	NaN
5.63366	2.33704	0.27756	5.5002	2.46801	0.152944	NaN	NaN	NaN	NaN	NaN	NaN
5.63819	2.32801	0.281652	5.51455	2.49385	0.151549	NaN	NaN	NaN	NaN	NaN	NaN
5.6504	2.34276	0.277269	5.51266	2.44486	0.132994	NaN	NaN	NaN	NaN	NaN	NaN
5.6685	2.3903	0.283343	5.52524	2.41838	0.123079	NaN	NaN	NaN	NaN	NaN	NaN
5.67926	2.37143	0.279887	5.53026	2.44964	0.125838	NaN	NaN	NaN	NaN	NaN	NaN
5.682	2.37825	0.277667	5.53563	2.50535	0.142033	NaN	NaN	NaN	NaN	NaN	NaN
5.68885	2.38635	0.280064	5.53284	2.37498	0.119408	NaN	NaN	NaN	NaN	NaN	NaN
5.69123	2.37032	0.280096	5.52972	2.33403	0.108482	NaN	NaN	NaN	NaN	NaN	NaN
5.69956	2.35776	0.270206	5.52378	2.31459	0.097778	NaN	NaN	NaN	NaN	NaN	NaN
5.70678	2.30401	0.256757	5.55627	2.38173	0.119098	NaN	NaN	NaN	NaN	NaN	NaN
5.7171	2.32562	0.257374	5.57484	2.35608	0.11135	NaN	NaN	NaN	NaN	NaN	NaN
5.728	2.33963	0.263994	5.5813	2.35473	0.110398	NaN	NaN	NaN	NaN	NaN	NaN
5.73332	2.32276	0.259814	5.58187	2.34104	0.111573	NaN	NaN	NaN	NaN	NaN	NaN
5.74525	2.33787	0.263437	5.60695	2.35347	0.108917	NaN	NaN	NaN	NaN	NaN	NaN
5.74754	2.3473	0.268336	5.60944	2.38723	0.111978	NaN	NaN	NaN	NaN	NaN	NaN
5.75031	2.35436	0.261391	5.62328	2.41624	0.110921	NaN	NaN	NaN	NaN	NaN	NaN
5.75446	2.34634	0.264176	5.62687	2.44556	0.114008	NaN	NaN	NaN	NaN	NaN	NaN
5.77062	2.35475	0.259207	5.6342	2.45726	0.113821	NaN	NaN	NaN	NaN	NaN	NaN
5.78161	2.39364	0.2648	5.63918	2.42231	0.112228	NaN	NaN	NaN	NaN	NaN	NaN
5.79273	2.39525	0.262246	5.65055	2.42234	0.111918	NaN	NaN	NaN	NaN	NaN	NaN
5.80225	2.40225	0.268608	5.65294	2.41844	0.111968	NaN	NaN	NaN	NaN	NaN	NaN
5.81304	2.40089	0.261775	5.6578	2.38371	0.112288	NaN	NaN	NaN	NaN	NaN	NaN
5.81731	2.39191	0.266242	5.6643	2.3418	0.107463	NaN	NaN	NaN	NaN	NaN	NaN
5.8211	2.38912	0.260858	5.66795	2.32876	0.110002	NaN	NaN	NaN	NaN	NaN	NaN
5.82524	2.37747	0.265007	5.68244	2.34112	0.107516	NaN	NaN	NaN	NaN	NaN	NaN
5.83077	2.396	0.262818	5.68907	2.43152	0.115454	NaN	NaN	NaN	NaN	NaN	NaN
5.8342	2.39899	0.263127	5.69137	2.44391	0.112949	NaN	NaN	NaN	NaN	NaN	NaN
5.83397	2.39039	0.262256	5.68866	2.43577	0.111871	NaN	NaN	NaN	NaN	NaN	NaN
5.84958	2.37111	0.252731	5.71988	2.39462	0.101429	NaN	NaN	NaN	NaN	NaN	NaN
5.85181	2.34327	0.24492	5.72635	2.36245	0.092232	NaN	NaN	NaN	NaN	NaN	NaN
5.86212	2.32881	0.24084	5.71938	2.3557	0.090364	NaN	NaN	NaN	NaN	NaN	NaN
5.87156	2.34144	0.244751	5.74698	2.36547	0.090472	NaN	NaN	NaN	NaN	NaN	NaN
5.88312	2.33428	0.239983	5.75863	2.39878	0.103068	NaN	NaN	NaN	NaN	NaN	NaN
5.89348	2.37506	0.245664	5.77066	2.43044	0.112951	NaN	NaN	NaN	NaN	NaN	NaN
5.90253	2.35059	0.242741	5.77712	2.43316	0.113436	NaN	NaN	NaN	NaN	NaN	NaN
5.91339	2.3504	0.248104	5.77902	2.40187	0.103468	NaN	NaN	NaN	NaN	NaN	NaN
5.93671	2.39274	0.248188	5.78238	2.39811	0.103324	NaN	NaN	NaN	NaN	NaN	NaN
5.95871	2.40676	0.248974	5.78116	2.40245	0.103108	NaN	NaN	NaN	NaN	NaN	NaN
5.95632	2.3799	0.23947	5.77978	2.36603	0.090262	NaN	NaN	NaN	NaN	NaN	NaN
5.96304	2.40379	0.240165	5.78096	2.34764	0.08346	NaN	NaN	NaN	NaN	NaN	NaN
5.9649	2.42626	0.245145	5.80209	2.36544	0.087875	NaN	NaN	NaN	NaN	NaN	NaN
5.97063	2.41893	0.244348	5.80718	2.33732	0.08335	NaN	NaN	NaN	NaN	NaN	NaN
5.97533	2.41381	0.244776	5.81482	2.35013	0.084658	NaN	NaN	NaN	NaN	NaN	NaN
5.97408	2.39192	0.237726	5.82521	2.43916	0.095861	NaN	NaN	NaN	NaN	NaN	NaN
5.97942	2.40104	0.240524	5.83516	2.41235	0.074967	NaN	NaN	NaN	NaN	NaN	NaN
5.98714	2.41527	0.244852	5.83954	2.41038	0.064098	NaN	NaN	NaN	NaN	NaN	NaN
5.9952	2.37688	0.234428	5.84285	2.37855	0.064484	NaN	NaN	NaN	NaN	NaN	NaN
6.00361	2.39609	0.228711	5.84983	2.33604	0.05194	NaN	NaN	NaN	NaN	NaN	NaN
6.01431	2.41494	0.225058	5.8506	2.33647	0.049681	NaN	NaN	NaN	NaN	NaN	NaN
6.02676	2.41815	0.226558	5.85967	2.39668	0.057128	NaN	NaN	NaN	NaN	NaN	NaN
6.03565	2.42787	0.227715	5.87738	2.40539	0.063448	NaN	NaN	NaN	NaN	NaN	NaN
6.04014	2.38487	0.227894	5.88372	2.39845	0.062246	NaN	NaN	NaN	NaN	NaN	NaN
6.04763	2.35463	0.223796	5.88757	2.37887	0.054259	NaN	NaN	NaN	NaN	NaN	NaN
6.05242	2.35538	0.228201	5.89503	2.35425	0.054036	NaN	NaN	NaN	NaN	NaN	NaN
6.05826	2.38504	0.223222	5.9062	2.40804	0.076027	NaN	NaN	NaN	NaN	NaN	NaN
6.06766	2.44564	0.231336	5.91644	2.39852	0.077012	NaN	NaN	NaN	NaN	NaN	NaN
6.07659	2.37675	0.215034	5.9202	2.41688	0.078149	NaN	NaN	NaN	NaN	NaN	NaN
6.0846	2.36918	0.210809	5.92297	2.39113	0.07296	NaN	NaN	NaN	NaN	NaN	NaN
6.09571	2.3611	0.204298	5.92803	2.39075	0.07544	NaN	NaN	NaN	NaN	NaN	NaN
6.10661	2.39865	0.210088	5.93466	2.38609	0.073989	NaN	NaN	NaN	NaN	NaN	NaN
6.11724	2.4039	0.215067	5.95097	2.42894	0.068371	NaN	NaN	NaN	NaN	NaN	NaN
6.11984	2.36737	0.210525	5.95684	2.45101	0.067809	NaN	NaN	NaN	NaN	NaN	NaN
6.12359	2.35948	0.203425	5.96269	2.46634	0.059774	NaN	NaN	NaN	NaN	NaN	NaN
6.13839	2.40721	0.210936	5.98008	2.44086	0.056119	NaN	NaN	NaN	NaN	NaN	NaN
6.14916	2.4379	0.209078	5.99125	2.46382	0.059737	NaN	NaN	NaN	NaN	NaN	NaN
6.15949	2.44213	0.213641	5.99431	2.4282	0.057716	NaN	NaN	NaN	NaN	NaN	NaN
6.16762	2.43062	0.20586	6.00931	2.40979	0.055514	NaN	NaN	NaN	NaN	NaN	NaN
6.17618	2.39022	0.211622	6.01517	2.39107	0.056674	NaN	NaN	NaN	NaN	NaN	NaN
6.18981	2.37469	0.211509	6.01219	2.38515	0.054358	NaN	NaN	NaN	NaN	NaN	NaN
6.18297	2.3718	0.202066	6.01387	2.39764	0.056993	NaN	NaN	NaN	NaN	NaN	NaN
6.18032	2.39136	0.205231	6.02552	2.40307	0.05653	NaN	NaN	NaN	NaN	NaN	NaN
6.18784	2.4403	0.208387	6.04279	2.43616	0.059428	NaN	NaN	NaN	NaN	NaN	NaN
6.19232	2.44929	0.20949	6.05478	2.45136	0.057275	NaN	NaN	NaN	NaN	NaN	NaN
6.20316	2.37355	0.187219	6.06062	2.46125	0.059418	NaN	NaN	NaN	NaN	NaN	NaN
6.20851	2.37904	0.190301	6.0684	2.43397	0.048646	NaN	NaN	NaN	NaN	NaN	NaN
6.21726	2.36141	0.185314	6.07046	2.39617	0.036485	6.10313	2.37791	0.159346	5.92881	2.54775	0.280093
6.22467	2.37868	0.191103	6.06735	2.36991	0.027208	6.11927	2.40982	0.170174	5.94414	2.53644	0.265273
6.23256	2.40667	0.186869	6.08303	2.3705	0.016458	6.12062	2.43826	0.169739	5.9955	2.62581	0.243886
6.23987	2.43498	0.190425	6.08578	2.37882	0.008859	6.13819	2.43687	0.173384	6.04721	2.5843	0.167861
6.24288	2.42009	0.190854	6.09843	2.50172	0.044186	6.15547	2.44811	0.173303	6.11506	2.60635	0.149347
6.26119	2.43278	0.191953	6.0973	2.40849	0.038804	6.16063	2.45242	0.174052	6.19404	2.53697	0.107699
6.27056	2.45767	0.193115	6.10298	2.43486	0.039548	6.1676	2.44338	0.173743	6.31166	2.5263	0.143207
6.27001	2.38952	0.188863	6.10807	2.41859	0.037979	6.17859	2.44026	0.171212	6.36702	2.58609	0.173318
6.27568	2.39199	0.192202	6.10988	2.41168	0.038845	6.18505	2.44423	0.173474	6.39427	2.63821	0.191104
6.27478	2.34571	0.176053	6.1322	2.44879	0.040634	6.19836	2.44944	0.172026	6.36536	2.54709	0.16
6.28605	2.37212	0.172921	6.1432	2.47305	0.040366	6.20201	2.44959	0.173185	6.29276	2.51523	0.099323
6.29756	2.3875	0.168619	6.14869	2.47668	0.043571	6.19872	2.44678	0.173444	6.19472	2.65415	0.128023
6.30776	2.36957	0.17368	6.16148	2.43151	0.03664	6.20009	2.44962	0.172612	6.09499	2.64254	0.201767
6.32014	2.4118	0.178925	6.17376	2.42676	0.030827	6.2123	2.45201	0.171621	6.04491	2.6407	0.23288
6.32635	2.3965	0.175352	6.18891	2.44799	0.031788	6.225	2.42715	0.164873	6.03448	2.50258	0.231749
6.33062	2.38463	0.167706	6.18467	2.45109	0.032638	6.23209	2.43956	0.17125	6.03514	2.48674	0.246956
6.3376	2.36422	0.164687	6.1952	2.48714	0.043276	6.25216	2.45015	0.172297	6.06218	2.54985	0.237507
6.34656	2.40336	0.17342	6.20013	2.47229	0.039272	6.25957	2.4461	0.171797	6.10347	2.60332	0.20423
6.35606	2.38816	0.170042	6.20274	2.48514	0.04304	6.25713	2.38826	0.153668	6.15708	2.55181	0.139553
6.36327	2.39688	0.174011	6.22349	2.48676	0.041498	6.27104	2.41081	0.148339	6.22189	2.51898	0.091283
6.37324	2.42591	0.172128	6.22917	2.41924	0.021285	6.27545	2.4432	0.150739	6.31985	2.47367	0.078191
6.38737	2.46891	0.1759	6.23829	2.38555	0.008916	6.28145	2.4558	0.153332	6.41725	2.54656	0.112959
6.38841	2.4073	0.169978	6.23557	2.35343	-0.001025	6.28657	2.42309	0.142626	6.47513	2.64234	0.160223
6.38962	2.37738	0.165039	6.23464	2.35821	-0.001178	6.29334	2.40338	0.135069	6.4909	2.56742	0.149544
6.39389	2.37798	0.16622	6.23872	2.3556	-0.002422	6.30084	2.39317	0.132245	6.46885	2.56785	0.129778
6.3968	2.4254	0.170872	6.25061	2.36228	-0.000325	6.30897	2.39079	0.131434	6.40787	2.56396	0.078189
6.39965	2.46254	0.17267	6.25328	2.35724	0.000628	6.31077	2.39289	0.132284	6.30656	2.66545	0.10939
6.41627	2.37735	0.160605	6.26469	2.35428	-0.002885	6.31585	2.39305	0.130814	6.19633	2.58744	0.160846
6.42583	2.33384	0.151971	6.26915	2.39295	0.000851	6.32025	2.39643	0.131933	6.15388	2.6335	0.213433
6.43794	2.35259	0.148188	6.28266	2.42921	0.001867	6.33375	2.40734	0.134328	6.14606	2.58446	0.227346
6.44571	2.33704	0.15256	6.27991	2.38899	0.00051	6.34007	2.3942	0.132882	6.15615	2.6032	0.243786
6.45352	2.36644	0.148592	6.28675	2.36477	-0.001444	6.35673	2.41028	0.135287	6.17237	2.51449	0.213085
6.46287	2.4166	0.155866	6.30096	2.40206	0.001359	6.3625	2.39739	0.133668	6.21492	2.63588	0.198089
6.47132	2.40719	0.15289	6.31041	2.42611	0.00147	6.37663	2.40437	0.134575	6.27016	2.57906	0.121452
6.47964	2.40576	0.155338	6.31246	2.42562	0.00089	6.38388	2.40766	0.136818	6.34498	2.69704	0.130367
6.49063	2.40968	0.15402	6.31428	2.43013	0.004312	6.39427	2.43876	0.135015	6.48606	2.63964	0.113075
6.48657	2.40214	0.146319	6.33403	2.42861	0.000744	6.39545	2.41286	0.126617	6.55381	2.59094	0.115369
6.48907	2.40075	0.148931	6.3427	2.4314	0.003001	6.40069	2.44035	0.126193	6.60492	2.65997	0.153676
6.49015	2.40091	0.151407	6.34919	2.42452	0.000826	6.39965	2.40585	0.113654	6.6142	2.61711	0.144167
6.49496	2.40635	0.152016	6.35222	2.4313	0.003023	6.40224	2.39631	0.109312	6.58529	2.55755	0.114156
6.5066	2.38135	0.141626	6.35788	2.43813	0.002409	6.40584	2.41341	0.117976	6.51265	2.65165	0.086178
6.51349	2.35462	0.136071	6.37222	2.44499	0.005025	6.41392	2.41319	0.114052	6.42685	2.65457	0.0781
6.52642	2.38011	0.132563	6.3765	2.4208	4.4e-05	6.41462	2.40105	0.112638	6.29973	2.64164	0.147636
6.53634	2.41353	0.136371	6.38215	2.433	0.00325	6.42077	2.40783	0.113665	6.26255	2.60543	0.181458
6.54768	2.41088	0.132148	6.40697	2.46712	0.004424	6.43251	2.41106	0.115746	6.25269	2.56486	0.20349
6.55456	2.37991	0.136286	6.41655	2.50357	0.006967	6.44643	2.41425	0.118193	6.26493	2.55767	0.211142
6.56163	2.33926	0.128854	6.41952	2.47034	-0.005782	6.45653	2.41658	0.116258	6.28393	2.62983	0.220181
6.56605	2.3546	0.135356	6.41496	2.41194	-0.017592	6.46903	2.40498	0.113403	6.31503	2.52725	0.143313
6.57271	2.34876	0.132329	6.41187	2.40861	-0.025914	6.48168	2.44953	0.120335	6.39345	2.63522	0.112549
6.57679	2.37642	0.132294	6.40964	2.40732	-0.029207	6.49013	2.39643	0.105586	6.46653	2.64103	0.093401
6.58709	2.39681	0.135626	6.4115	2.38244	-0.036533	6.48938	2.35381	0.096464	6.55365	2.54962	0.054747
6.59513	2.41172	0.136254	6.432	2.38198	-0.037401	6.49458	2.38429	0.094476	6.65756	2.5607	0.08314
6.60116	2.41891	0.13482	6.43586	2.41275	-0.025606	6.49741	2.38007	0.09374	6.69829	2.5752	0.107544
6.61104	2.43262	0.137676	6.43966	2.44534	-0.014515	6.501	2.41955	0.095522	6.71671	2.62681	0.125368
6.61771	2.40034	0.133227	6.45603	2.44186	-0.01514	6.50569	2.43877	0.097457	6.67665	2.58785	0.092182
6.62935	2.44841	0.138748	6.45991	2.45903	-0.012317	6.51538	2.45628	0.097443	6.59686	2.59183	0.048739
6.6375	2.41123	0.133746	6.46973	2.43395	-0.016971	6.52388	2.48891	0.099155	6.50559	2.68322	0.091464
6.64955	2.43689	0.139337	6.48985	2.38572	-0.03691	6.52979	2.47448	0.099361	6.40886	2.7518	0.168095
6.65708	2.40431	0.13224	6.49521	2.34928	-0.049811	6.54392	2.49177	0.098602	6.37181	2.61674	0.178442
6.66416	2.37708	0.117553	6.49431	2.31743	-0.060361	6.55934	2.46318	0.102071	6.36071	2.55483	0.187874
6.67098	2.33659	0.108975	6.50512	2.35128	-0.047851	6.55988	2.39626	0.089947	6.36691	2.61106	0.21749
6.67344	2.3706	0.115975	6.52649	2.36782	-0.044901	6.56658	2.39721	0.09082	6.3874	2.53485	0.175434
6.67742	2.35385	0.111532	6.53913	2.38666	-0.037177	6.56979	2.41608	0.095387	6.42362	2.56554	0.129499
6.67828	2.3444	0.109075	6.53318	2.36343	-0.045196	6.58842	2.4291	0.098821	6.48819	2.52794	0.069241
6.68561	2.39464	0.115842	6.5336	2.36401	-0.045175	6.59481	2.43149	0.100828	6.56615	2.5905	0.06426
6.69475	2.43438	0.117647	6.53737	2.38874	-0.036701	6.59671	2.39926	0.086854	6.67861	2.53972	0.039132
6.70462	2.38868	0.104688	6.53743	2.35168	-0.050333	6.60538	2.39358	0.085341	6.76427	2.5866	0.08472
6.70949	2.38205	0.10103	6.54296	2.35517	-0.058351	6.6054	2.3961	0.079154	6.81133	2.67232	0.123698
6.7159	2.36431	0.093334	6.55637	2.40395	-0.052183	6.61148	2.38242	0.075955	6.81454	2.58695	0.088926
6.71665	2.34452	0.090273	6.55769	2.42653	-0.05327	6.62122	2.3803	0.08009	6.78749	2.5155	0.070105
6.72518	2.37793	0.095273	6.57478	2.43475	-0.052013	6.62964	2.3685	0.075669	6.70252	2.57697	0.021103
6.72899	2.35914	0.093808	6.59579	2.47315	-0.047965	6.63446	2.33968	0.067881	6.62383	2.72468	0.078087
6.74983	2.36773	0.09401	6.60939	2.46338	-0.051938	6.64086	2.37908	0.079602	6.50814	2.58717	0.11502
6.7542	2.36991	0.098284	6.60203	2.42716	-0.052646	6.64306	2.36828	0.075609	6.47283	2.56938	0.15036
6.76119	2.3844	0.099462	6.61395	2.39736	-0.055429	6.65098	2.3758	0.077149	6.45847	2.52987	0.167671
6.76382	2.36138	0.09287	6.61756	2.39535	-0.054172	6.65554	2.39628	0.077936	6.47951	2.51692	0.183052
6.77627	2.3798	0.099161	6.62089	2.39296	-0.055208	6.66745	2.41842	0.087546	6.49655	2.52312	0.159685
6.78304	2.36408	0.093253	6.62491	2.40253	-0.054387	6.6812	2.41617	0.081818	6.51672	2.48922	0.10719
6.79311	2.37813	0.101832	6.63154	2.39637	-0.054981	6.69777	2.44471	0.083411	6.58727	2.58405	0.071954
6.80144	2.41066	0.098794	6.64272	2.4067	-0.054123	6.70308	2.41176	0.072438	6.66907	2.52978	0.030784
6.81056	2.43197	0.098361	6.64785	2.39091	-0.053472	6.71089	2.43192	0.076154	6.78051	2.49969	0.018248
6.81937	2.45277	0.10189	6.65374	2.36664	-0.066857	6.71572	2.42538	0.078003	6.87213	2.62116	0.07478
6.83057	2.43289	0.096404	6.65814	2.33048	-0.077378	6.71864	2.46685	0.078764	6.92036	2.66425	0.104217
6.83181	2.39038	0.08546	6.66198	2.34081	-0.084683	6.71939	2.47507	0.080609	6.92301	2.59987	0.082013
6.84109	2.34527	0.071032	6.66913	2.40693	-0.073318	6.71934	2.47565	0.080629	6.91045	2.56583	0.06487
6.84574	2.39156	0.084983	6.67145	2.43795	-0.0725	6.73109	2.44599	0.070185	6.84314	2.60338	0.02286
6.85105	2.3888	0.077674	6.67407	2.37717	-0.0748	6.73739	2.44952	0.063357	6.72726	2.64383	0.043718
6.85778	2.40262	0.083187	6.68921	2.39305	-0.075369	6.74444	2.45491	0.062495	6.62848	2.5989	0.09639
6.8651	2.37813	0.075613	6.69489	2.40303	-0.072427	6.75293	2.44366	0.060169	6.5818	2.60882	0.1516
6.8679	2.36826	0.07483	6.70392	2.41592	-0.071209	6.77074	2.46418	0.065433	6.57086	2.49059	0.146978
6.87704	2.39579	0.081671	6.71118	2.40216	-0.074472	6.77607	2.41785	0.06318	6.58864	2.62344	0.1875
6.89159	2.41158	0.076887	6.71436	2.41081	-0.071612	6.78754	2.41417	0.069151	6.5905	2.53667	0.152736
6.90311	2.45172	0.083483	6.72401	2.41154	-0.073429	6.79226	2.38779	0.06241	6.62104	2.62773	0.117105
6.89887	2.38375	0.068017	6.74104	2.37553	-0.074591	6.80921	2.38375	0.059697	6.69309	2.59658	0.069057
6.9095	2.38948	0.059392	6.75022	2.41196	-0.071759	6.82086	2.39171	0.062778	6.76468	2.58407	0.037494
6.91267	2.37434	0.056894	6.75024	2.39669	-0.075094	6.83774	2.3825	0.058499	6.84971	2.53482	-0.011495
6.91861	2.38569	0.065946	6.7566	2.40569	-0.07481	6.84479	2.42788	0.062473	6.97315	2.62747	0.044153
6.93019	2.39004	0.069409	6.75843	2.4028	-0.07415	6.85188	2.44811	0.060834	7.01958	2.61549	0.075242
6.93764	2.39101	0.058675	6.76558	2.37509	-0.08491	6.84742	2.39994	0.052777	7.03416	2.5399	0.064326
6.94756	2.38722	0.062538	6.76757	2.3221	-0.094507	6.84849	2.4242	0.053405	7.02258	2.52877	0.040188
6.9599	2.40194	0.05882	6.78055	2.36027	-0.091963	6.85327	2.4417	0.055511	6.96363	2.64994	0.021499
6.96988	2.38676	0.058438	6.79229	2.34531	-0.093167	6.85836	2.45199	0.061284	6.86782	2.72489	0.028285
6.97289	2.42171	0.06612	6.80381	2.36023	-0.091304	6.86429	2.45801	0.061419	6.74839	2.54897	0.051614
6.98182	2.40673	0.062909	6.81396	2.34731	-0.094693	6.87587	2.42348	0.050152	6.70156	2.5588	0.106909
6.98822	2.38009	0.057104	6.81833	2.35946	-0.092761	6.88579	2.40856	0.043919	6.68883	2.59736	0.135884
6.99914	2.44605	0.075365	6.82344	2.34678	-0.095022	6.89521	2.39443	0.042028	6.6938	2.58157	0.151
7.00822	2.45546	0.078819	6.83364	2.36329	-0.092489	6.9075	2.43688	0.054101	6.71922	2.58522	0.151332
7.01785	2.45802	0.08445	6.84207	2.35182	-0.09395	6.9158	2.45139	0.061331	6.74939	2.57346	0.115686
7.02307	2.45643	0.080053	6.8431	2.34996	-0.094601	6.92115	2.45741	0.064038	6.77731	2.59289	0.06142
7.0263	2.4216	0.067488	6.84252	2.36458	-0.090905	6.93155	2.4351	0.054093	6.85921	2.5122	0.01122
7.02814	2.38534	0.05902	6.84822	2.34686	-0.097212	6.93883	2.44441	0.058279	6.95502	2.57676	-0.009142
7.0331	2.38842	0.054657	6.8637	2.39666	-0.090505	6.94413	2.46447	0.052515	7.05513	2.58105	0.011162
7.02733	2.36533	0.055546	6.8735	2.4159	-0.091873	6.95053	2.43191	0.032182	7.12346	2.64284	0.057242
7.03504	2.38853	0.05847	6.87717	2.42231	-0.089671	6.95778	2.42658	0.031754	7.14321	2.64118	0.06123
7.03617	2.38817	0.058472	6.87977	2.38908	-0.091154	6.96432	2.43736	0.032229	7.13193	2.56921	0.026676
7.05706	2.40883	0.060308	6.88129	2.36896	-0.090726	6.95726	2.40617	0.022426	7.08041	2.60352	0.008311
7.06403	2.35229	0.044167	6.8886	2.36536	-0.093524	6.95728	2.46156	0.036301	6.98092	2.70555	0.004447
7.07424	2.36334	0.045614	6.89708	2.4055	-0.087305	6.97241	2.45155	0.033696	6.87487	2.6517	0.064316
7.08156	2.32636	0.036721	6.91125	2.42465	-0.091489	6.9845	2.40257	0.020949	6.81876	2.65457	0.107339
7.0937	2.35571	0.042553	6.92683	2.45471	-0.087007	6.99468	2.43888	0.033129	6.79623	2.61274	0.129117
7.0999	2.32376	0.036319	6.9302	2.40781	-0.091404	7.00417	2.45031	0.039843	6.80163	2.53781	0.134052
7.11369	2.36033	0.043596	6.93245	2.39869	-0.099204	7.01566	2.4805	0.047433	6.81241	2.51622	0.141217
7.11634	2.35718	0.037573	6.94613	2.40638	-0.099735	7.02114	2.46247	0.043086	6.8438	2.65018	0.14259
7.12297	2.35901	0.043548	6.94832	2.39362	-0.10106	7.02567	2.46469	0.044887	6.8723	2.63207	0.063441
7.12728	2.34416	0.0401	6.94832	2.36638	-0.111221	7.03835	2.44575	0.035839	6.95895	2.63446	0.016895
7.12763	2.35194	0.04384	6.95345	2.36245	-0.114577	7.04239	2.45412	0.040358	7.03446	2.6658	-0.005004
7.12789	2.3381	0.037574	6.96324	2.34954	-0.113541	7.0461	2.43505	0.033138	7.15726	2.61172	0.005165
7.13563	2.36164	0.038221	6.97912	2.36105	-0.113964	7.05012	2.40797	0.022217	7.22024	2.60418	0.024664
7.13769	2.33818	0.037653	6.99007	2.39973	-0.109312	7.05255	2.37659	0.013134	7.2481	2.62383	0.049183
7.14736	2.33688	0.037803	6.98775	2.3866	-0.109546	7.06194	2.38331	0.011807	7.26065	2.63207	0.033848
7.15276	2.35459	0.044823	6.99544	2.37711	-0.110298	7.06192	2.34412	0.001817	7.20633	2.61014	0.013118
7.16115	2.38576	0.040845	7.00305	2.39894	-0.110965	7.06118	2.35293	0.001235	7.12661	2.66005	-0.008721
7.17516	2.43134	0.048863	7.01784	2.43996	-0.107492	7.06546	2.37995	0.012014	7.01357	2.71963	0.036464
7.17764	2.38232	0.030355	7.02192	2.44108	-0.107798	7.07883	2.36004	0.00311	6.93283	2.67404	0.081178
7.19226	2.36108	0.024592	7.03564	2.41268	-0.109033	7.09281	2.39112	0.015067	6.91218	2.57335	0.096638
7.20253	2.34603	0.018315	7.04004	2.389	-0.118248	7.10515	2.47323	0.029161	6.90898	2.5206	0.110266
7.20707	2.35108	0.022957	7.05427	2.44428	-0.117898	7.11729	2.42383	0.02867	6.91273	2.54836	0.115308
7.21265	2.37006	0.019399	7.05934	2.45205	-0.125487	7.12334	2.38968	0.013859	6.9489	2.6945	0.133067
7.21305	2.35774	0.020019	7.05486	2.44753	-0.12687	7.12889	2.34499	0.000561	6.9778	2.64209	0.060429
7.2139	2.35546	0.022211	7.05562	2.45853	-0.125011	7.13599	2.38186	0.014669	7.05413	2.6114	0.016351
7.23263	2.42022	0.034326	7.0705	2.41387	-0.130414	7.15289	2.44938	0.024978	7.13812	2.64097	0.002336
7.24094	2.42299	0.026129	7.08177	2.41793	-0.125609	7.16581	2.491	0.029277	7.24022	2.7005	-0.006271
7.25192	2.43528	0.027658	7.09342	2.40807	-0.129429	7.17463	2.41211	0.013695	7.31253	2.67527	0.020323
7.25608	2.37114	0.020625	7.09395	2.38191	-0.128372	7.17552	2.3667	0.005406	7.35554	2.65402	0.026
7.26694	2.37531	0.026349	7.08909	2.38271	-0.128196	7.18239	2.45234	0.005681	7.37025	2.66605	0.034513
7.27402	2.37574	0.021283	7.09838	2.39559	-0.126378	7.1832	2.4658	0.007768	7.31571	2.64133	0.008466
7.27953	2.39131	0.022176	7.10952	2.39675	-0.12932	7.18263	2.46084	0.006044	7.23919	2.63632	-0.041774
7.28343	2.42584	0.024039	7.11659	2.38065	-0.124527	7.18142	2.49212	0.008475	7.11793	2.74232	0.033509
7.28482	2.4288	0.023413	7.1299	2.41207	-0.129642	7.18451	2.46321	0.005049	7.04775	2.66533	0.06707
7.29862	2.4267	0.024058	7.13746	2.45624	-0.123779	7.20165	2.4995	0.008881	7.01601	2.5719	0.084887
7.31789	2.41283	0.018504	7.14423	2.47728	-0.125081	7.20896	2.46844	0.011179	7.00912	2.5556	0.10274
7.32698	2.42553	0.027413	7.14471	2.49111	-0.122931	7.22343	2.43218	0.006568	7.02426	2.51837	0.102502
7.33429	2.41178	0.022133	7.1688	2.48977	-0.124177	NaN	NaN	NaN	NaN	NaN	NaN
7.34203	2.44591	0.028499	7.17706	2.52504	-0.122666	NaN	NaN	NaN	NaN	NaN	NaN
7.35083	2.42931	0.025007	7.17837	2.48436	-0.121879	NaN	NaN	NaN	NaN	NaN	NaN
7.35821	2.40711	0.020118	7.18188	2.46606	-0.123786	NaN	NaN	NaN	NaN	NaN	NaN
7.36569	2.43459	0.024327	7.18295	2.44364	-0.127418	NaN	NaN	NaN	NaN	NaN	NaN
7.37209	2.44577	0.02881	7.18361	2.45298	-0.127826	NaN	NaN	NaN	NaN	NaN	NaN
7.38095	2.42762	0.029613	7.18976	2.45195	-0.126925	NaN	NaN	NaN	NaN	NaN	NaN
7.38487	2.36322	0.001334	7.19648	2.43773	-0.133476	NaN	NaN	NaN	NaN	NaN	NaN
7.38785	2.33777	-0.001026	7.19994	2.45372	-0.127613	NaN	NaN	NaN	NaN	NaN	NaN
7.39413	2.38406	0.002336	7.21801	2.48297	-0.121191	NaN	NaN	NaN	NaN	NaN	NaN
7.40114	2.41542	0.01408	7.23109	2.39189	-0.14717	NaN	NaN	NaN	NaN	NaN	NaN
7.40566	2.37548	0.004033	7.22745	2.3522	-0.160482	NaN	NaN	NaN	NaN	NaN	NaN
7.41137	2.38474	0.007468	7.24279	2.34162	-0.16808	NaN	NaN	NaN	NaN	NaN	NaN
7.42219	2.43342	0.004474	7.24593	2.36833	-0.166785	NaN	NaN	NaN	NaN	NaN	NaN
7.43373	2.46289	0.011075	7.25242	2.46771	-0.142553	NaN	NaN	NaN	NaN	NaN	NaN
7.43988	2.42789	0.004315	7.26075	2.50852	-0.137444	NaN	NaN	NaN	NaN	NaN	NaN
7.45248	2.45555	0.01123	7.26915	2.468	-0.138511	NaN	NaN	NaN	NaN	NaN	NaN
7.45953	2.42911	0.005786	7.28122	2.42073	-0.155664	NaN	NaN	NaN	NaN	NaN	NaN
7.47153	2.46071	0.012864	7.2923	2.41377	-0.164272	NaN	NaN	NaN	NaN	NaN	NaN
7.46951	2.42744	0.00545	7.29706	2.36639	-0.165162	NaN	NaN	NaN	NaN	NaN	NaN
7.47649	2.44814	0.006028	7.3101	2.3746	-0.167561	NaN	NaN	NaN	NaN	NaN	NaN
7.47525	2.42125	0.005638	7.3148	2.40472	-0.164401	NaN	NaN	NaN	NaN	NaN	NaN
7.48462	2.40596	-0.004329	7.31349	2.37319	-0.16571	NaN	NaN	NaN	NaN	NaN	NaN
7.48809	2.39714	-0.010036	7.30919	2.33201	-0.169763	NaN	NaN	NaN	NaN	NaN	NaN
7.49476	2.39071	-0.014447	7.3188	2.37939	-0.167234	NaN	NaN	NaN	NaN	NaN	NaN
7.50286	2.42027	-0.004192	7.32964	2.40039	-0.165605	NaN	NaN	NaN	NaN	NaN	NaN
7.50358	2.38439	-0.013322	7.33885	2.40311	-0.166773	NaN	NaN	NaN	NaN	NaN	NaN
7.5021	2.38148	-0.015537	7.34714	2.44417	-0.162117	NaN	NaN	NaN	NaN	NaN	NaN
7.51858	2.41927	-0.013687	7.36046	2.44713	-0.163446	NaN	NaN	NaN	NaN	NaN	NaN
7.53742	2.44528	-0.011179	7.37035	2.44902	-0.171102	NaN	NaN	NaN	NaN	NaN	NaN
7.5363	2.4335	-0.009681	7.37271	2.45035	-0.17027	NaN	NaN	NaN	NaN	NaN	NaN
7.54234	2.44951	-0.013357	7.37554	2.4099	-0.165149	NaN	NaN	NaN	NaN	NaN	NaN
7.5515	2.42944	-0.007929	7.37851	2.40001	-0.165574	NaN	NaN	NaN	NaN	NaN	NaN
7.55918	2.3915	-0.012545	7.38021	2.35418	-0.186353	NaN	NaN	NaN	NaN	NaN	NaN
7.57091	2.43019	-0.007454	7.38496	2.29959	-0.20019	NaN	NaN	NaN	NaN	NaN	NaN
7.58463	2.41426	-0.009232	7.39328	2.29343	-0.207663	NaN	NaN	NaN	NaN	NaN	NaN
7.58872	2.39341	-0.00876	7.40266	2.32221	-0.205582	NaN	NaN	NaN	NaN	NaN	NaN
7.59673	2.38862	-0.014774	7.41484	2.36905	-0.185651	NaN	NaN	NaN	NaN	NaN	NaN
7.59735	2.34336	-0.027326	7.42093	2.36963	-0.178774	NaN	NaN	NaN	NaN	NaN	NaN
7.60269	2.3431	-0.034657	7.43432	2.42818	-0.180098	NaN	NaN	NaN	NaN	NaN	NaN
7.61277	2.35447	-0.027272	7.43955	2.46383	-0.177416	NaN	NaN	NaN	NaN	NaN	NaN
7.62017	2.36048	-0.034434	7.44883	2.48324	-0.180834	NaN	NaN	NaN	NaN	NaN	NaN
7.63165	2.4127	-0.027925	7.45836	2.45163	-0.179802	NaN	NaN	NaN	NaN	NaN	NaN
7.63758	2.38798	-0.034682	7.46795	2.41801	-0.183101	NaN	NaN	NaN	NaN	NaN	NaN
7.64464	2.40373	-0.027744	7.47036	2.42236	-0.181561	NaN	NaN	NaN	NaN	NaN	NaN
7.65477	2.39678	-0.033667	7.48545	2.42833	-0.182343	NaN	NaN	NaN	NaN	NaN	NaN
7.65838	2.40499	-0.028152	7.48793	2.42189	-0.182255	NaN	NaN	NaN	NaN	NaN	NaN
7.66692	2.43371	-0.030193	7.48796	2.42047	-0.181943	NaN	NaN	NaN	NaN	NaN	NaN
7.66989	2.46384	-0.028058	7.48516	2.42169	-0.182823	NaN	NaN	NaN	NaN	NaN	NaN
7.68865	2.47295	-0.028401	7.50281	2.41994	-0.186066	NaN	NaN	NaN	NaN	NaN	NaN
7.69721	2.46464	-0.026053	7.50381	2.41857	-0.184593	NaN	NaN	NaN	NaN	NaN	NaN
7.6904	2.46512	-0.029418	7.50944	2.41857	-0.183482	NaN	NaN	NaN	NaN	NaN	NaN
7.70582	2.45629	-0.024213	7.52228	2.39124	-0.194543	NaN	NaN	NaN	NaN	NaN	NaN
7.71504	2.49132	-0.019982	7.52132	2.3708	-0.202771	NaN	NaN	NaN	NaN	NaN	NaN
7.71647	2.47219	-0.028351	7.52203	2.37801	-0.201852	NaN	NaN	NaN	NaN	NaN	NaN
7.719	2.46624	-0.027649	7.53473	2.38485	-0.198176	NaN	NaN	NaN	NaN	NaN	NaN
7.72563	2.46945	-0.028924	7.5407	2.35604	-0.205448	NaN	NaN	NaN	NaN	NaN	NaN
7.7347	2.40512	-0.050525	7.54552	2.36768	-0.202594	NaN	NaN	NaN	NaN	NaN	NaN
7.74096	2.44296	-0.036742	7.56472	2.40357	-0.202634	NaN	NaN	NaN	NaN	NaN	NaN
7.75287	2.47143	-0.029752	7.57513	2.43558	-0.199473	NaN	NaN	NaN	NaN	NaN	NaN
7.762	2.47306	-0.025673	7.58352	2.43339	-0.20073	NaN	NaN	NaN	NaN	NaN	NaN
7.77179	2.47481	-0.029324	7.59626	2.44658	-0.199367	NaN	NaN	NaN	NaN	NaN	NaN
7.77952	2.41743	-0.044299	7.60353	2.44587	-0.197392	NaN	NaN	NaN	NaN	NaN	NaN
7.78867	2.41184	-0.050543	7.61309	2.47606	-0.197308	NaN	NaN	NaN	NaN	NaN	NaN
7.80031	2.41902	-0.04451	7.61686	2.51094	-0.19411	NaN	NaN	NaN	NaN	NaN	NaN
7.80246	2.40732	-0.052913	7.62142	2.50023	-0.198262	NaN	NaN	NaN	NaN	NaN	NaN
7.8125	2.38382	-0.054061	7.62594	2.44636	-0.198563	NaN	NaN	NaN	NaN	NaN	NaN
7.82189	2.38863	-0.052156	7.63235	2.47558	-0.196695	NaN	NaN	NaN	NaN	NaN	NaN
7.8234	2.41677	-0.05014	7.63846	2.44875	-0.200103	NaN	NaN	NaN	NaN	NaN	NaN
7.83127	2.43393	-0.048442	7.64499	2.45619	-0.197241	NaN	NaN	NaN	NaN	NaN	NaN
7.83601	2.43333	-0.04813	7.66233	2.45173	-0.207634	NaN	NaN	NaN	NaN	NaN	NaN
7.84285	2.43258	-0.044222	7.66854	2.47072	-0.207638	NaN	NaN	NaN	NaN	NaN	NaN
7.84693	2.41626	-0.050447	7.67166	2.44492	-0.217784	NaN	NaN	NaN	NaN	NaN	NaN
7.8535	2.46412	-0.043626	7.68196	2.41729	-0.219205	NaN	NaN	NaN	NaN	NaN	NaN
7.85855	2.48063	-0.048571	7.6877	2.41703	-0.218768	NaN	NaN	NaN	NaN	NaN	NaN
7.86303	2.47318	-0.05326	7.70096	2.44857	-0.218771	NaN	NaN	NaN	NaN	NaN	NaN
7.87688	2.47309	-0.050327	7.70695	2.45315	-0.217221	NaN	NaN	NaN	NaN	NaN	NaN
7.88342	2.52383	-0.039594	7.71117	2.4579	-0.216383	NaN	NaN	NaN	NaN	NaN	NaN
7.88246	2.49913	-0.042379	7.71418	2.45601	-0.217365	NaN	NaN	NaN	NaN	NaN	NaN
7.88772	2.45852	-0.056214	7.71851	2.43961	-0.218496	NaN	NaN	NaN	NaN	NaN	NaN
7.89492	2.41327	-0.071263	7.73459	2.48212	-0.217871	NaN	NaN	NaN	NaN	NaN	NaN
7.90429	2.43017	-0.062157	7.73981	2.52038	-0.21314	NaN	NaN	NaN	NaN	NaN	NaN
7.91327	2.42438	-0.068968	7.74079	2.51862	-0.213213	NaN	NaN	NaN	NaN	NaN	NaN
7.91002	2.41262	-0.070211	7.74266	2.4559	-0.216056	NaN	NaN	NaN	NaN	NaN	NaN
7.91702	2.45549	-0.068244	7.76228	2.45301	-0.217519	NaN	NaN	NaN	NaN	NaN	NaN
7.92544	2.50411	-0.065068	7.76992	2.4502	-0.215711	NaN	NaN	NaN	NaN	NaN	NaN
7.92712	2.49462	-0.064736	7.78632	2.48489	-0.216575	NaN	NaN	NaN	NaN	NaN	NaN
7.93856	2.42952	-0.077488	7.79708	2.52723	-0.212718	NaN	NaN	NaN	NaN	NaN	NaN
7.95414	2.44681	-0.081115	7.79899	2.52053	-0.222887	NaN	NaN	NaN	NaN	NaN	NaN
7.9645	2.41886	-0.088346	7.80014	2.48855	-0.235452	NaN	NaN	NaN	NaN	NaN	NaN
7.96631	2.41931	-0.082742	7.80208	2.50495	-0.241794	NaN	NaN	NaN	NaN	NaN	NaN
7.96782	2.45375	-0.077561	7.80922	2.49318	-0.241723	NaN	NaN	NaN	NaN	NaN	NaN
7.97606	2.43136	-0.08649	7.81689	2.52003	-0.233934	NaN	NaN	NaN	NaN	NaN	NaN
7.98607	2.4245	-0.080319	7.82468	2.43268	-0.237291	NaN	NaN	NaN	NaN	NaN	NaN
7.99362	2.42208	-0.08609	7.83217	2.46783	-0.234563	NaN	NaN	NaN	NaN	NaN	NaN
8.00183	2.44947	-0.081815	7.83303	2.4544	-0.235962	NaN	NaN	NaN	NaN	NaN	NaN
8.00998	2.43197	-0.086524	7.83114	2.46009	-0.236238	NaN	NaN	NaN	NaN	NaN	NaN
8.01469	2.44499	-0.079662	7.83836	2.46298	-0.236714	NaN	NaN	NaN	NaN	NaN	NaN
8.02526	2.45946	-0.079515	7.85579	2.47364	-0.233736	NaN	NaN	NaN	NaN	NaN	NaN
8.02922	2.43642	-0.086403	7.86144	2.47622	-0.233336	NaN	NaN	NaN	NaN	NaN	NaN
8.03072	2.43853	-0.085917	7.86935	2.46954	-0.232756	NaN	NaN	NaN	NaN	NaN	NaN
8.03784	2.44304	-0.085063	7.88241	2.42104	-0.247714	NaN	NaN	NaN	NaN	NaN	NaN
8.04254	2.43048	-0.086684	7.88864	2.40581	-0.257229	NaN	NaN	NaN	NaN	NaN	NaN
8.05338	2.44459	-0.085421	7.89179	2.46258	-0.247282	NaN	NaN	NaN	NaN	NaN	NaN
8.06134	2.43314	-0.086092	7.89994	2.49692	-0.246659	NaN	NaN	NaN	NaN	NaN	NaN
8.07243	2.45926	-0.08068	7.89907	2.50828	-0.251041	NaN	NaN	NaN	NaN	NaN	NaN
8.07889	2.43258	-0.086985	7.91599	2.51701	-0.249311	NaN	NaN	NaN	NaN	NaN	NaN
8.09167	2.45798	-0.080261	7.92344	2.47457	-0.253821	NaN	NaN	NaN	NaN	NaN	NaN
8.0993	2.44118	-0.084013	7.93251	2.48875	-0.250601	NaN	NaN	NaN	NaN	NaN	NaN
8.10739	2.49449	-0.077673	7.93602	2.47136	-0.255471	NaN	NaN	NaN	NaN	NaN	NaN
8.1168	2.51368	-0.083161	7.93897	2.47708	-0.252367	NaN	NaN	NaN	NaN	NaN	NaN
8.1235	2.50727	-0.076953	7.94852	2.4427	-0.255409	NaN	NaN	NaN	NaN	NaN	NaN
8.12107	2.46866	-0.088353	7.95749	2.47382	-0.252434	NaN	NaN	NaN	NaN	NaN	NaN
8.12525	2.5047	-0.085654	7.95792	2.48427	-0.251159	NaN	NaN	NaN	NaN	NaN	NaN
8.12958	2.5055	-0.08099	7.97827	2.48415	-0.252862	NaN	NaN	NaN	NaN	NaN	NaN
8.1398	2.50674	-0.08998	7.98692	2.49127	-0.25069	NaN	NaN	NaN	NaN	NaN	NaN
8.14436	2.43691	-0.103586	7.99352	2.48335	-0.248875	NaN	NaN	NaN	NaN	NaN	NaN
8.15146	2.44182	-0.101615	7.99514	2.44757	-0.25411	NaN	NaN	NaN	NaN	NaN	NaN
8.16326	2.45802	-0.104045	7.99624	2.48245	-0.25125	NaN	NaN	NaN	NaN	NaN	NaN
8.16666	2.45739	-0.098835	8.00276	2.48136	-0.253255	NaN	NaN	NaN	NaN	NaN	NaN
8.17288	2.4549	-0.103896	8.02374	2.46138	-0.261824	NaN	NaN	NaN	NaN	NaN	NaN
8.17755	2.46955	-0.098901	8.03048	2.45646	-0.262715	NaN	NaN	NaN	NaN	NaN	NaN
8.18212	2.44808	-0.104456	8.03037	2.41588	-0.275972	NaN	NaN	NaN	NaN	NaN	NaN
8.18282	2.4746	-0.096045	8.02813	2.41791	-0.278903	NaN	NaN	NaN	NaN	NaN	NaN
8.18376	2.45246	-0.102738	8.0343	2.38993	-0.288249	NaN	NaN	NaN	NaN	NaN	NaN
8.18877	2.45703	-0.102641	8.04864	2.35238	-0.297279	NaN	NaN	NaN	NaN	NaN	NaN
8.19807	2.42222	-0.1131	8.05771	2.36661	-0.295283	NaN	NaN	NaN	NaN	NaN	NaN
8.20246	2.38478	-0.125228	8.06489	2.39581	-0.284321	NaN	NaN	NaN	NaN	NaN	NaN
8.21367	2.40406	-0.12161	8.06915	2.37884	-0.289595	NaN	NaN	NaN	NaN	NaN	NaN
8.21831	2.39519	-0.124874	8.07154	2.37523	-0.294091	NaN	NaN	NaN	NaN	NaN	NaN
8.21943	2.40176	-0.124192	8.07848	2.37575	-0.294113	NaN	NaN	NaN	NaN	NaN	NaN
8.23389	2.43225	-0.122187	8.08267	2.38849	-0.284789	NaN	NaN	NaN	NaN	NaN	NaN
8.2434	2.46037	-0.121253	8.08641	2.38982	-0.288399	NaN	NaN	NaN	NaN	NaN	NaN
8.26837	2.45937	-0.121054	8.08714	2.37231	-0.29499	NaN	NaN	NaN	NaN	NaN	NaN
8.26749	2.46785	-0.116842	8.10699	2.3997	-0.284009	NaN	NaN	NaN	NaN	NaN	NaN
8.27381	2.48128	-0.116797	8.11253	2.39609	-0.284358	NaN	NaN	NaN	NaN	NaN	NaN
8.27776	2.46319	-0.12182	8.12637	2.39131	-0.287746	NaN	NaN	NaN	NaN	NaN	NaN
8.28335	2.4773	-0.116935	8.13099	2.3652	-0.295928	NaN	NaN	NaN	NaN	NaN	NaN
8.2875	2.47459	-0.119418	8.1345	2.36783	-0.295606	NaN	NaN	NaN	NaN	NaN	NaN
8.29153	2.46713	-0.11862	8.14137	2.40142	-0.293264	NaN	NaN	NaN	NaN	NaN	NaN
8.2941	2.47552	-0.117294	8.15078	2.43806	-0.290979	NaN	NaN	NaN	NaN	NaN	NaN
8.30805	2.46357	-0.121357	8.15386	2.45344	-0.29212	NaN	NaN	NaN	NaN	NaN	NaN
8.31007	2.5075	-0.114483	8.15455	2.45813	-0.290192	NaN	NaN	NaN	NaN	NaN	NaN
8.31961	2.48628	-0.120889	8.15553	2.44483	-0.290674	NaN	NaN	NaN	NaN	NaN	NaN
8.32445	2.45859	-0.125465	8.18336	2.41876	-0.300641	NaN	NaN	NaN	NaN	NaN	NaN
8.3261	2.4685	-0.123666	8.18278	2.41756	-0.300443	NaN	NaN	NaN	NaN	NaN	NaN
8.32783	2.46887	-0.119296	8.18223	2.40039	-0.301882	NaN	NaN	NaN	NaN	NaN	NaN
8.33709	2.51154	-0.118464	8.19554	2.399	-0.305687	NaN	NaN	NaN	NaN	NaN	NaN
8.35331	2.50518	-0.127748	8.21641	2.38349	-0.312964	NaN	NaN	NaN	NaN	NaN	NaN
8.36184	2.48637	-0.134162	8.22322	2.40983	-0.302184	NaN	NaN	NaN	NaN	NaN	NaN
8.36336	2.48423	-0.13413	8.22805	2.41205	-0.300565	NaN	NaN	NaN	NaN	NaN	NaN
8.36657	2.4685	-0.140273	8.24105	2.44624	-0.290959	NaN	NaN	NaN	NaN	NaN	NaN
8.36648	2.47304	-0.139685	8.24293	2.44511	-0.290809	NaN	NaN	NaN	NaN	NaN	NaN
8.38158	2.47496	-0.137306	8.24373	2.44621	-0.289228	NaN	NaN	NaN	NaN	NaN	NaN
8.38901	2.49362	-0.131681	8.23924	2.43845	-0.292825	NaN	NaN	NaN	NaN	NaN	NaN
8.39708	2.47812	-0.138478	8.24901	2.40985	-0.304271	NaN	NaN	NaN	NaN	NaN	NaN
8.40295	2.48915	-0.134811	8.24921	2.38306	-0.313075	NaN	NaN	NaN	NaN	NaN	NaN
8.40576	2.4719	-0.138779	8.27025	2.42276	-0.310221	NaN	NaN	NaN	NaN	NaN	NaN
8.41222	2.48839	-0.13767	8.28102	2.45521	-0.308457	NaN	NaN	NaN	NaN	NaN	NaN
8.41385	2.47901	-0.137862	8.27892	2.48415	-0.307195	NaN	NaN	NaN	NaN	NaN	NaN
8.42173	2.45882	-0.147847	8.28204	2.52322	-0.304575	NaN	NaN	NaN	NaN	NaN	NaN
8.42389	2.43793	-0.155297	8.29746	2.53032	-0.304133	NaN	NaN	NaN	NaN	NaN	NaN
8.4327	2.43247	-0.15709	8.30147	2.51391	-0.306065	NaN	NaN	NaN	NaN	NaN	NaN
8.44733	2.45076	-0.148919	8.30254	2.523	-0.304653	NaN	NaN	NaN	NaN	NaN	NaN
8.46604	2.47648	-0.150625	8.31582	2.52263	-0.305	NaN	NaN	NaN	NaN	NaN	NaN
8.46745	2.49607	-0.152328	8.32503	2.52085	-0.305609	NaN	NaN	NaN	NaN	NaN	NaN
8.47402	2.49053	-0.15732	8.32982	2.5296	-0.303954	NaN	NaN	NaN	NaN	NaN	NaN
8.48281	2.50202	-0.153309	8.33002	2.52102	-0.30588	NaN	NaN	NaN	NaN	NaN	NaN
8.49069	2.48442	-0.156232	8.35175	2.48811	-0.316832	NaN	NaN	NaN	NaN	NaN	NaN
8.49354	2.50105	-0.151703	8.35534	2.46735	-0.326715	NaN	NaN	NaN	NaN	NaN	NaN
8.50354	2.48944	-0.157514	8.36265	2.48916	-0.317281	NaN	NaN	NaN	NaN	NaN	NaN
8.5089	2.5019	-0.15233	8.36706	2.44143	-0.323447	NaN	NaN	NaN	NaN	NaN	NaN
8.5147	2.46753	-0.152441	8.3647	2.39744	-0.330297	NaN	NaN	NaN	NaN	NaN	NaN
8.51673	2.4183	-0.160859	8.36922	2.46562	-0.327762	NaN	NaN	NaN	NaN	NaN	NaN
8.51504	2.42044	-0.160216	8.38227	2.49275	-0.325993	NaN	NaN	NaN	NaN	NaN	NaN
8.51593	2.46955	-0.156709	8.38678	2.5356	-0.322404	NaN	NaN	NaN	NaN	NaN	NaN
8.52826	2.49583	-0.154935	8.38992	2.54904	-0.319964	NaN	NaN	NaN	NaN	NaN	NaN
8.53116	2.49903	-0.153885	8.40218	2.52175	-0.324506	NaN	NaN	NaN	NaN	NaN	NaN
8.54611	2.50119	-0.155255	8.40956	2.50491	-0.324046	NaN	NaN	NaN	NaN	NaN	NaN
8.55766	2.49577	-0.155806	8.41698	2.50733	-0.324386	NaN	NaN	NaN	NaN	NaN	NaN
8.55562	2.50168	-0.153193	8.41682	2.52816	-0.323865	NaN	NaN	NaN	NaN	NaN	NaN
8.56507	2.49643	-0.155892	8.41907	2.50256	-0.334304	NaN	NaN	NaN	NaN	NaN	NaN
8.56735	2.47077	-0.164872	8.44618	2.47355	-0.345864	NaN	NaN	NaN	NaN	NaN	NaN
8.56701	2.4419	-0.174193	8.45059	2.45195	-0.352923	NaN	NaN	NaN	NaN	NaN	NaN
8.57097	2.44364	-0.173647	8.45243	2.50101	-0.336369	NaN	NaN	NaN	NaN	NaN	NaN
8.58092	2.43802	-0.17668	8.45307	2.45808	-0.340895	NaN	NaN	NaN	NaN	NaN	NaN
8.58586	2.43048	-0.17783	8.45281	2.46462	-0.345282	NaN	NaN	NaN	NaN	NaN	NaN
8.58839	2.44145	-0.173728	8.46957	2.47099	-0.346248	NaN	NaN	NaN	NaN	NaN	NaN
8.59825	2.46951	-0.175954	8.49034	2.48032	-0.344248	NaN	NaN	NaN	NaN	NaN	NaN
8.60546	2.51294	-0.170992	8.491	2.47961	-0.343709	NaN	NaN	NaN	NaN	NaN	NaN
8.61872	2.54462	-0.16977	8.49008	2.48124	-0.344563	NaN	NaN	NaN	NaN	NaN	NaN
8.62585	2.5412	-0.17042	8.49057	2.48228	-0.342795	NaN	NaN	NaN	NaN	NaN	NaN
8.64898	2.49813	-0.174757	8.50265	2.4722	-0.345964	NaN	NaN	NaN	NaN	NaN	NaN
8.66374	2.52023	-0.170243	8.51457	2.48253	-0.343863	NaN	NaN	NaN	NaN	NaN	NaN
8.66347	2.46685	-0.185883	8.52007	2.47929	-0.344311	NaN	NaN	NaN	NaN	NaN	NaN
8.66907	2.4487	-0.196067	8.52051	2.47692	-0.344605	NaN	NaN	NaN	NaN	NaN	NaN
8.67245	2.45324	-0.193992	8.52327	2.44736	-0.356052	NaN	NaN	NaN	NaN	NaN	NaN
8.67388	2.47748	-0.185646	8.5456	2.42327	-0.366651	NaN	NaN	NaN	NaN	NaN	NaN
8.67942	2.45545	-0.192057	8.54645	2.40377	-0.371642	NaN	NaN	NaN	NaN	NaN	NaN
8.68713	2.46188	-0.189601	8.54729	2.42118	-0.366578	NaN	NaN	NaN	NaN	NaN	NaN
8.69931	2.44922	-0.195266	8.54827	2.42348	-0.365135	NaN	NaN	NaN	NaN	NaN	NaN
8.70574	2.48811	-0.189443	8.55502	2.41682	-0.367487	NaN	NaN	NaN	NaN	NaN	NaN
8.7033	2.44846	-0.196087	8.55623	2.42054	-0.365963	NaN	NaN	NaN	NaN	NaN	NaN
8.71688	2.48353	-0.194079	8.57582	2.45541	-0.354489	NaN	NaN	NaN	NaN	NaN	NaN
8.72611	2.52721	-0.186476	8.58588	2.48394	-0.343664	NaN	NaN	NaN	NaN	NaN	NaN
8.73432	2.52744	-0.192067	8.58697	2.48664	-0.34275	NaN	NaN	NaN	NaN	NaN	NaN
8.72507	2.52441	-0.189863	8.5895	2.44907	-0.352634	NaN	NaN	NaN	NaN	NaN	NaN
8.72732	2.52091	-0.191342	8.59108	2.44968	-0.356061	NaN	NaN	NaN	NaN	NaN	NaN
8.74139	2.45921	-0.203614	8.59532	2.45797	-0.363747	NaN	NaN	NaN	NaN	NaN	NaN
8.74828	2.44918	-0.214121	8.60105	2.4854	-0.363067	NaN	NaN	NaN	NaN	NaN	NaN
8.75105	2.46075	-0.211538	8.61075	2.51637	-0.361933	NaN	NaN	NaN	NaN	NaN	NaN
8.7551	2.45754	-0.214064	8.61318	2.5329	-0.35972	NaN	NaN	NaN	NaN	NaN	NaN
8.75849	2.4646	-0.211101	8.61996	2.56223	-0.358165	NaN	NaN	NaN	NaN	NaN	NaN
8.76458	2.45445	-0.213345	8.62675	2.54368	-0.360059	NaN	NaN	NaN	NaN	NaN	NaN
8.77331	2.44005	-0.209071	8.63728	2.53632	-0.359471	NaN	NaN	NaN	NaN	NaN	NaN
8.78513	2.44617	-0.213824	8.64629	2.53002	-0.360893	NaN	NaN	NaN	NaN	NaN	NaN
8.79202	2.49679	-0.197764	8.65296	2.55669	-0.359293	NaN	NaN	NaN	NaN	NaN	NaN
8.79536	2.51076	-0.192189	8.64295	2.52368	-0.360931	NaN	NaN	NaN	NaN	NaN	NaN
8.811	2.53506	-0.185625	8.6428	2.54778	-0.360028	NaN	NaN	NaN	NaN	NaN	NaN
8.80774	2.48279	-0.204027	8.66577	2.55689	-0.35962	NaN	NaN	NaN	NaN	NaN	NaN
8.81	2.46791	-0.212551	8.67666	2.53674	-0.358208	NaN	NaN	NaN	NaN	NaN	NaN
8.82588	2.46522	-0.214325	8.68387	2.56345	-0.356114	NaN	NaN	NaN	NaN	NaN	NaN
8.83337	2.45738	-0.212523	8.68431	2.55258	-0.358004	NaN	NaN	NaN	NaN	NaN	NaN
8.83366	2.4944	-0.211463	8.6827	2.56081	-0.358316	NaN	NaN	NaN	NaN	NaN	NaN
8.83937	2.52789	-0.209705	8.69598	2.60006	-0.355771	NaN	NaN	NaN	NaN	NaN	NaN
8.85186	2.53335	-0.208734	8.71125	2.56078	-0.368392	NaN	NaN	NaN	NaN	NaN	NaN
8.85655	2.53883	-0.206206	8.709	2.53863	-0.378152	NaN	NaN	NaN	NaN	NaN	NaN
8.86225	2.52401	-0.210359	8.71526	2.54277	-0.376846	NaN	NaN	NaN	NaN	NaN	NaN
8.87703	2.53997	-0.204348	8.72906	2.59656	-0.366593	NaN	NaN	NaN	NaN	NaN	NaN
8.8804	2.53251	-0.2091	8.73345	2.55607	-0.363144	NaN	NaN	NaN	NaN	NaN	NaN
8.88768	2.5453	-0.202473	8.73711	2.5621	-0.360236	NaN	NaN	NaN	NaN	NaN	NaN
8.88725	2.52686	-0.210208	8.73492	2.50439	-0.379155	NaN	NaN	NaN	NaN	NaN	NaN
8.89237	2.52233	-0.209403	8.74926	2.47033	-0.392397	NaN	NaN	NaN	NaN	NaN	NaN
8.90311	2.51043	-0.218572	8.75649	2.44491	-0.401992	NaN	NaN	NaN	NaN	NaN	NaN
8.90467	2.49821	-0.230983	8.75951	2.44149	-0.40316	NaN	NaN	NaN	NaN	NaN	NaN
8.91004	2.50847	-0.224076	8.76527	2.44789	-0.40123	NaN	NaN	NaN	NaN	NaN	NaN
8.91122	2.51823	-0.219434	8.77169	2.45905	-0.400149	NaN	NaN	NaN	NaN	NaN	NaN
8.91753	2.48704	-0.226302	8.77826	2.47837	-0.388212	NaN	NaN	NaN	NaN	NaN	NaN
8.92611	2.52217	-0.224876	8.78641	2.50733	-0.379546	NaN	NaN	NaN	NaN	NaN	NaN
8.93641	2.54142	-0.228592	8.78875	2.51403	-0.377703	NaN	NaN	NaN	NaN	NaN	NaN
8.94284	2.55869	-0.222277	8.80055	2.54184	-0.387338	NaN	NaN	NaN	NaN	NaN	NaN
8.94759	2.53386	-0.228992	8.80373	2.55335	-0.39554	NaN	NaN	NaN	NaN	NaN	NaN
8.95091	2.52704	-0.223136	8.81073	2.52282	-0.396299	NaN	NaN	NaN	NaN	NaN	NaN
8.95807	2.52717	-0.227832	8.82007	2.5475	-0.386216	NaN	NaN	NaN	NaN	NaN	NaN
8.96211	2.50948	-0.228241	8.82708	2.53181	-0.393361	NaN	NaN	NaN	NaN	NaN	NaN
8.96523	2.48047	-0.22926	8.83588	2.48517	-0.4006	NaN	NaN	NaN	NaN	NaN	NaN
8.96703	2.4756	-0.230813	8.84078	2.52663	-0.387597	NaN	NaN	NaN	NaN	NaN	NaN
8.97162	2.54238	-0.216052	8.84572	2.53797	-0.389313	NaN	NaN	NaN	NaN	NaN	NaN
8.97509	2.47825	-0.225134	8.84408	2.52009	-0.396713	NaN	NaN	NaN	NaN	NaN	NaN
8.99317	2.47838	-0.226727	8.84663	2.4882	-0.399076	NaN	NaN	NaN	NaN	NaN	NaN
9.0032	2.47925	-0.229653	8.8622	2.50536	-0.398135	NaN	NaN	NaN	NaN	NaN	NaN
9.00715	2.5348	-0.223938	8.86376	2.52567	-0.395913	NaN	NaN	NaN	NaN	NaN	NaN
9.0126	2.54977	-0.225549	8.86398	2.51778	-0.395617	NaN	NaN	NaN	NaN	NaN	NaN
9.02598	2.52739	-0.224415	8.87217	2.52239	-0.396621	NaN	NaN	NaN	NaN	NaN	NaN
9.02829	2.51097	-0.238417	8.87748	2.52022	-0.397152	NaN	NaN	NaN	NaN	NaN	NaN
9.03348	2.47963	-0.249843	8.88135	2.51695	-0.398168	NaN	NaN	NaN	NaN	NaN	NaN
9.05108	2.49958	-0.244843	8.90645	2.49553	-0.407069	NaN	NaN	NaN	NaN	NaN	NaN
9.05716	2.48234	-0.249698	8.90859	2.49796	-0.406574	NaN	NaN	NaN	NaN	NaN	NaN
9.06513	2.47284	-0.243363	8.90681	2.48428	-0.4107	NaN	NaN	NaN	NaN	NaN	NaN
9.07122	2.44828	-0.250452	8.91782	2.49987	-0.40721	NaN	NaN	NaN	NaN	NaN	NaN
9.06756	2.47099	-0.232867	8.92274	2.4965	-0.40708	NaN	NaN	NaN	NaN	NaN	NaN
9.0707	2.48328	-0.230042	8.93303	2.51973	-0.397465	NaN	NaN	NaN	NaN	NaN	NaN
9.07069	2.48176	-0.229167	8.93432	2.49823	-0.406589	NaN	NaN	NaN	NaN	NaN	NaN
9.07466	2.51957	-0.227018	8.93641	2.49621	-0.406511	NaN	NaN	NaN	NaN	NaN	NaN
9.07871	2.55876	-0.225559	8.93548	2.50192	-0.406035	NaN	NaN	NaN	NaN	NaN	NaN
9.0793	2.53331	-0.235461	8.94155	2.52521	-0.397302	NaN	NaN	NaN	NaN	NaN	NaN
9.0977	2.506	-0.24639	8.94718	2.53122	-0.396465	NaN	NaN	NaN	NaN	NaN	NaN
9.10426	2.50438	-0.241935	8.96803	2.50188	-0.404427	NaN	NaN	NaN	NaN	NaN	NaN
9.11534	2.49064	-0.248225	8.9671	2.50059	-0.406488	NaN	NaN	NaN	NaN	NaN	NaN
9.12189	2.50903	-0.242775	8.97241	2.49601	-0.407582	NaN	NaN	NaN	NaN	NaN	NaN
9.13337	2.4875	-0.248855	8.97592	2.46226	-0.419728	NaN	NaN	NaN	NaN	NaN	NaN
9.14439	2.50504	-0.24283	8.97492	2.44572	-0.426689	NaN	NaN	NaN	NaN	NaN	NaN
9.14737	2.48633	-0.24873	8.98843	2.45145	-0.424684	NaN	NaN	NaN	NaN	NaN	NaN
9.15142	2.5109	-0.2416	8.99589	2.49528	-0.417619	NaN	NaN	NaN	NaN	NaN	NaN
9.15538	2.50405	-0.245772	8.99474	2.49943	-0.414793	NaN	NaN	NaN	NaN	NaN	NaN
9.15862	2.49677	-0.245168	9.00287	2.4347	-0.421105	NaN	NaN	NaN	NaN	NaN	NaN
9.15797	2.49453	-0.247558	9.01392	2.45824	-0.41938	NaN	NaN	NaN	NaN	NaN	NaN
9.16186	2.49231	-0.24718	9.01671	2.46743	-0.417157	NaN	NaN	NaN	NaN	NaN	NaN
9.16507	2.49781	-0.246959	9.01614	2.46945	-0.417239	NaN	NaN	NaN	NaN	NaN	NaN
9.18392	2.51634	-0.241845	9.0274	2.46976	-0.418765	NaN	NaN	NaN	NaN	NaN	NaN
9.19194	2.51805	-0.244704	9.03372	2.47454	-0.416505	NaN	NaN	NaN	NaN	NaN	NaN
9.19247	2.49482	-0.247397	9.03593	2.47885	-0.41644	NaN	NaN	NaN	NaN	NaN	NaN
9.19779	2.50721	-0.245142	9.04711	2.43877	-0.42575	NaN	NaN	NaN	NaN	NaN	NaN
9.20838	2.50494	-0.246142	9.06517	2.46379	-0.430536	NaN	NaN	NaN	NaN	NaN	NaN
9.21507	2.5301	-0.246016	9.06963	2.51073	-0.4244	NaN	NaN	NaN	NaN	NaN	NaN
9.21869	2.51583	-0.241737	9.07229	2.52261	-0.426351	NaN	NaN	NaN	NaN	NaN	NaN
9.22203	2.46905	-0.257942	9.07112	2.47086	-0.436197	NaN	NaN	NaN	NaN	NaN	NaN
9.23785	2.48593	-0.262212	9.07124	2.47921	-0.436998	NaN	NaN	NaN	NaN	NaN	NaN
9.24354	2.49842	-0.266128	9.07581	2.44418	-0.439022	NaN	NaN	NaN	NaN	NaN	NaN
9.24845	2.52028	-0.25867	9.09002	2.51245	-0.423927	NaN	NaN	NaN	NaN	NaN	NaN
9.24605	2.50641	-0.263922	9.09113	2.5103	-0.414574	NaN	NaN	NaN	NaN	NaN	NaN
9.25623	2.51024	-0.265188	9.10589	2.57862	-0.408782	NaN	NaN	NaN	NaN	NaN	NaN
9.26711	2.51991	-0.259404	9.10961	2.56635	-0.411293	NaN	NaN	NaN	NaN	NaN	NaN
9.27978	2.5224	-0.257848	9.11115	2.5462	-0.41254	NaN	NaN	NaN	NaN	NaN	NaN
9.28475	2.51638	-0.258931	9.12326	2.51134	-0.415581	NaN	NaN	NaN	NaN	NaN	NaN
9.27768	2.51231	-0.263968	9.13069	2.5305	-0.413084	NaN	NaN	NaN	NaN	NaN	NaN
9.27788	2.51144	-0.265901	9.13097	2.54643	-0.412224	NaN	NaN	NaN	NaN	NaN	NaN
9.2979	2.52315	-0.252755	9.13133	2.56237	-0.408523	NaN	NaN	NaN	NaN	NaN	NaN
9.31285	2.55108	-0.242894	9.13198	2.5061	-0.416385	NaN	NaN	NaN	NaN	NaN	NaN
9.32016	2.58173	-0.237781	9.14287	2.48377	-0.416232	NaN	NaN	NaN	NaN	NaN	NaN
9.31646	2.5288	-0.245594	9.1497	2.50853	-0.415284	NaN	NaN	NaN	NaN	NaN	NaN
9.31832	2.52397	-0.249977	9.16357	2.49599	-0.415464	NaN	NaN	NaN	NaN	NaN	NaN
9.31653	2.56674	-0.245377	9.17307	2.51869	-0.413793	NaN	NaN	NaN	NaN	NaN	NaN
9.32172	2.57479	-0.242794	9.18203	2.58608	-0.410065	NaN	NaN	NaN	NaN	NaN	NaN
9.33203	2.54497	-0.252531	9.186	2.61137	-0.409651	NaN	NaN	NaN	NaN	NaN	NaN
9.3376	2.51454	-0.26313	9.1881	2.60066	-0.410122	NaN	NaN	NaN	NaN	NaN	NaN
9.3443	2.51385	-0.263245	9.19547	2.61089	-0.410199	NaN	NaN	NaN	NaN	NaN	NaN
9.34717	2.51365	-0.264888	9.20106	2.58478	-0.410237	NaN	NaN	NaN	NaN	NaN	NaN
9.34893	2.50806	-0.26397	9.20283	2.56713	-0.410593	NaN	NaN	NaN	NaN	NaN	NaN
9.34852	2.51271	-0.263545	9.20433	2.55073	-0.412687	NaN	NaN	NaN	NaN	NaN	NaN
9.35747	2.50893	-0.264642	9.20976	2.51229	-0.415422	NaN	NaN	NaN	NaN	NaN	NaN
9.35815	2.53978	-0.257918	9.21792	2.55316	-0.412417	NaN	NaN	NaN	NaN	NaN	NaN
9.37912	2.49478	-0.263672	9.22659	2.52676	-0.411073	NaN	NaN	NaN	NaN	NaN	NaN
9.39175	2.52246	-0.258411	9.23802	2.49466	-0.42408	NaN	NaN	NaN	NaN	NaN	NaN
9.39555	2.51329	-0.264214	9.24305	2.52746	-0.421443	NaN	NaN	NaN	NaN	NaN	NaN
9.40489	2.53566	-0.257784	9.24721	2.51941	-0.423821	NaN	NaN	NaN	NaN	NaN	NaN
9.40566	2.51654	-0.26362	9.25693	2.55409	-0.412857	NaN	NaN	NaN	NaN	NaN	NaN
9.40597	2.51399	-0.263929	9.2631	2.55331	-0.412029	NaN	NaN	NaN	NaN	NaN	NaN
9.4145	2.51405	-0.264659	9.26315	2.55986	-0.410784	NaN	NaN	NaN	NaN	NaN	NaN
9.42231	2.50022	-0.259683	9.27181	2.55353	-0.412024	NaN	NaN	NaN	NaN	NaN	NaN
9.43199	2.45522	-0.266241	9.27595	2.56592	-0.410284	NaN	NaN	NaN	NaN	NaN	NaN
9.42992	2.50792	-0.256507	9.28053	2.55351	-0.412872	NaN	NaN	NaN	NaN	NaN	NaN
9.43832	2.48578	-0.258934	9.28616	2.54763	-0.41307	NaN	NaN	NaN	NaN	NaN	NaN
9.44182	2.48272	-0.265516	9.29008	2.52125	-0.414042	NaN	NaN	NaN	NaN	NaN	NaN
9.44033	2.46759	-0.265926	9.29669	2.58685	-0.408834	NaN	NaN	NaN	NaN	NaN	NaN
9.45001	2.49076	-0.26512	9.29976	2.58425	-0.408715	NaN	NaN	NaN	NaN	NaN	NaN
9.45866	2.52325	-0.263902	9.29876	2.56179	-0.411594	NaN	NaN	NaN	NaN	NaN	NaN
9.47179	2.52947	-0.261488	9.31404	2.56229	-0.411174	NaN	NaN	NaN	NaN	NaN	NaN
9.47678	2.53798	-0.255873	9.32989	2.55498	-0.410701	NaN	NaN	NaN	NaN	NaN	NaN
9.47947	2.52802	-0.262106	9.3313	2.55946	-0.410606	NaN	NaN	NaN	NaN	NaN	NaN
9.48858	2.54157	-0.258204	9.33681	2.56313	-0.409737	NaN	NaN	NaN	NaN	NaN	NaN
9.49076	2.51918	-0.263234	9.3475	2.55911	-0.411466	NaN	NaN	NaN	NaN	NaN	NaN
9.50071	2.49225	-0.264361	9.35042	2.56209	-0.410183	NaN	NaN	NaN	NaN	NaN	NaN
9.50113	2.45566	-0.266763	9.35353	2.56408	-0.410341	NaN	NaN	NaN	NaN	NaN	NaN
9.51136	2.51112	-0.262578	9.3658	2.55663	-0.412264	NaN	NaN	NaN	NaN	NaN	NaN
9.51619	2.53684	-0.260362	9.36703	2.56937	-0.409116	NaN	NaN	NaN	NaN	NaN	NaN
9.51859	2.50197	-0.261946	9.3656	2.55885	-0.412701	NaN	NaN	NaN	NaN	NaN	NaN
9.52938	2.51511	-0.263274	9.37558	2.55565	-0.412436	NaN	NaN	NaN	NaN	NaN	NaN
9.53618	2.53765	-0.254637	9.38238	2.56283	-0.409689	NaN	NaN	NaN	NaN	NaN	NaN
9.5448	2.56873	-0.259357	9.38704	2.56684	-0.409735	NaN	NaN	NaN	NaN	NaN	NaN
9.55183	2.55768	-0.261049	9.39012	2.56154	-0.410995	NaN	NaN	NaN	NaN	NaN	NaN
9.55742	2.53034	-0.261137	9.40361	2.568	-0.410494	NaN	NaN	NaN	NaN	NaN	NaN
9.5589	2.51185	-0.262439	9.40701	2.5697	-0.408698	NaN	NaN	NaN	NaN	NaN	NaN
9.56474	2.53283	-0.261028	9.40807	2.5295	-0.420327	NaN	NaN	NaN	NaN	NaN	NaN
9.56963	2.52492	-0.26167	9.41407	2.54595	-0.418217	NaN	NaN	NaN	NaN	NaN	NaN
9.57884	2.53812	-0.261393	9.42486	2.56497	-0.410351	NaN	NaN	NaN	NaN	NaN	NaN
9.58821	2.554	-0.256375	9.42664	2.56734	-0.409483	NaN	NaN	NaN	NaN	NaN	NaN
9.59728	2.52692	-0.261659	9.42529	2.56916	-0.409398	NaN	NaN	NaN	NaN	NaN	NaN
9.60681	2.55138	-0.256994	9.4472	2.57091	-0.410201	NaN	NaN	NaN	NaN	NaN	NaN
9.61675	2.52397	-0.262067	9.45371	2.56906	-0.409775	NaN	NaN	NaN	NaN	NaN	NaN
9.62153	2.56354	-0.25358	9.45359	2.58004	-0.407662	NaN	NaN	NaN	NaN	NaN	NaN
9.63008	2.54716	-0.258126	9.45979	2.56674	-0.411186	NaN	NaN	NaN	NaN	NaN	NaN
9.63727	2.54829	-0.257797	9.47247	2.56766	-0.409962	NaN	NaN	NaN	NaN	NaN	NaN
9.63304	2.55499	-0.254751	9.47325	2.5742	-0.408264	NaN	NaN	NaN	NaN	NaN	NaN
9.6392	2.54071	-0.26143	9.48114	2.5645	-0.411181	NaN	NaN	NaN	NaN	NaN	NaN
9.63923	2.53884	-0.261897	9.4814	2.57401	-0.408653	NaN	NaN	NaN	NaN	NaN	NaN
9.63994	2.5104	-0.261437	9.4816	2.57346	-0.408478	NaN	NaN	NaN	NaN	NaN	NaN
9.64531	2.53269	-0.262625	9.49042	2.57296	-0.410094	NaN	NaN	NaN	NaN	NaN	NaN
9.65383	2.55217	-0.257853	9.49064	2.57792	-0.407731	NaN	NaN	NaN	NaN	NaN	NaN
9.65507	2.55365	-0.255886	9.49602	2.50517	-0.43276	NaN	NaN	NaN	NaN	NaN	NaN
9.66124	2.52697	-0.26381	9.50745	2.53836	-0.422767	NaN	NaN	NaN	NaN	NaN	NaN
9.66116	2.53667	-0.261489	9.5104	2.50874	-0.432363	NaN	NaN	NaN	NaN	NaN	NaN
9.66936	2.54341	-0.260176	9.52328	2.54155	-0.421371	NaN	NaN	NaN	NaN	NaN	NaN
9.67718	2.53342	-0.26176	9.53341	2.55354	-0.417835	NaN	NaN	NaN	NaN	NaN	NaN
9.68701	2.53733	-0.260756	9.53808	2.57144	-0.410312	NaN	NaN	NaN	NaN	NaN	NaN
9.69284	2.51733	-0.260303	9.53802	2.58241	-0.407498	NaN	NaN	NaN	NaN	NaN	NaN
9.7024	2.56356	-0.252829	9.54149	2.57465	-0.41021	NaN	NaN	NaN	NaN	NaN	NaN
9.70809	2.55896	-0.250477	9.54494	2.57409	-0.408736	NaN	NaN	NaN	NaN	NaN	NaN
9.71701	2.55698	-0.255999	9.56088	2.57343	-0.409034	NaN	NaN	NaN	NaN	NaN	NaN
9.7231	2.54394	-0.254272	9.56736	2.57709	-0.408567	NaN	NaN	NaN	NaN	NaN	NaN
9.7212	2.51185	-0.262163	9.56711	2.5815	-0.407772	NaN	NaN	NaN	NaN	NaN	NaN
9.72459	2.54166	-0.260357	9.57662	2.57748	-0.40813	NaN	NaN	NaN	NaN	NaN	NaN
9.72535	2.55339	-0.260114	9.5763	2.57509	-0.409514	NaN	NaN	NaN	NaN	NaN	NaN
9.74018	2.55316	-0.248868	9.58166	2.58722	-0.40665	NaN	NaN	NaN	NaN	NaN	NaN
9.74886	2.61469	-0.233509	9.58921	2.57162	-0.410121	NaN	NaN	NaN	NaN	NaN	NaN
9.74694	2.58532	-0.24537	9.59628	2.58141	-0.407571	NaN	NaN	NaN	NaN	NaN	NaN
9.74528	2.59221	-0.243133	9.60145	2.57985	-0.407939	NaN	NaN	NaN	NaN	NaN	NaN
9.74514	2.61288	-0.236901	9.60617	2.58414	-0.407927	NaN	NaN	NaN	NaN	NaN	NaN
9.7536	2.6059	-0.238544	9.61893	2.57966	-0.408601	NaN	NaN	NaN	NaN	NaN	NaN
9.76677	2.58744	-0.236055	9.6233	2.5791	-0.409282	NaN	NaN	NaN	NaN	NaN	NaN
9.77519	2.60446	-0.236932	9.62852	2.5867	-0.407041	NaN	NaN	NaN	NaN	NaN	NaN
9.78105	2.52047	-0.248327	9.63166	2.57704	-0.41062	NaN	NaN	NaN	NaN	NaN	NaN
9.78573	2.51379	-0.245766	9.6329	2.57583	-0.408812	NaN	NaN	NaN	NaN	NaN	NaN
9.78927	2.52141	-0.239623	9.63262	2.54954	-0.409889	NaN	NaN	NaN	NaN	NaN	NaN
9.79411	2.53389	-0.240674	9.64221	2.59896	-0.407422	NaN	NaN	NaN	NaN	NaN	NaN
9.80469	2.54969	-0.248913	9.6495	2.61033	-0.407039	NaN	NaN	NaN	NaN	NaN	NaN
9.80875	2.49946	-0.257204	9.65589	2.57848	-0.40755	NaN	NaN	NaN	NaN	NaN	NaN
9.81239	2.49052	-0.26305	9.66268	2.58975	-0.406546	NaN	NaN	NaN	NaN	NaN	NaN
9.82076	2.57434	-0.232064	9.66229	2.59151	-0.4064	NaN	NaN	NaN	NaN	NaN	NaN
9.83571	2.55743	-0.23687	9.68004	2.54498	-0.411189	NaN	NaN	NaN	NaN	NaN	NaN
9.83847	2.52485	-0.247613	9.69201	2.52224	-0.410529	NaN	NaN	NaN	NaN	NaN	NaN
9.84039	2.54142	-0.243704	9.69752	2.55366	-0.408995	NaN	NaN	NaN	NaN	NaN	NaN
9.84005	2.5516	-0.24003	9.69611	2.54812	-0.409358	NaN	NaN	NaN	NaN	NaN	NaN
9.84563	2.54859	-0.24082	9.70467	2.52475	-0.410152	NaN	NaN	NaN	NaN	NaN	NaN
9.85002	2.5511	-0.239833	9.71403	2.51653	-0.412862	NaN	NaN	NaN	NaN	NaN	NaN
9.8479	2.56037	-0.236346	9.7188	2.52523	-0.410215	NaN	NaN	NaN	NaN	NaN	NaN
9.85478	2.55556	-0.238145	9.72308	2.55446	-0.409986	NaN	NaN	NaN	NaN	NaN	NaN
9.86193	2.54709	-0.240354	9.72792	2.58372	-0.407878	NaN	NaN	NaN	NaN	NaN	NaN
9.87022	2.56161	-0.23479	9.72781	2.58977	-0.406959	NaN	NaN	NaN	NaN	NaN	NaN
9.87485	2.56169	-0.234553	9.72709	2.5877	-0.40766	NaN	NaN	NaN	NaN	NaN	NaN
9.88236	2.55087	-0.240527	9.72677	2.58974	-0.407543	NaN	NaN	NaN	NaN	NaN	NaN
9.88566	2.56762	-0.234154	9.72717	2.58857	-0.407784	NaN	NaN	NaN	NaN	NaN	NaN
9.89033	2.55704	-0.240005	9.74694	2.55786	-0.409185	NaN	NaN	NaN	NaN	NaN	NaN
9.88859	2.55725	-0.238371	9.75913	2.55364	-0.406849	NaN	NaN	NaN	NaN	NaN	NaN
9.89742	2.55272	-0.239917	9.75738	2.52076	-0.411684	NaN	NaN	NaN	NaN	NaN	NaN
9.9053	2.56129	-0.237324	9.77606	2.5595	-0.398947	NaN	NaN	NaN	NaN	NaN	NaN
9.91082	2.55428	-0.240221	9.78625	2.59373	-0.386541	NaN	NaN	NaN	NaN	NaN	NaN
9.92243	2.55025	-0.240508	9.79145	2.53795	-0.406563	NaN	NaN	NaN	NaN	NaN	NaN
9.93034	2.56806	-0.235094	9.7863	2.53057	-0.409909	NaN	NaN	NaN	NaN	NaN	NaN
9.93105	2.55144	-0.240225	9.78462	2.52425	-0.411955	NaN	NaN	NaN	NaN	NaN	NaN
9.93465	2.55509	-0.239198	9.78474	2.53252	-0.409415	NaN	NaN	NaN	NaN	NaN	NaN
9.93997	2.56328	-0.236585	9.79385	2.52514	-0.411255	NaN	NaN	NaN	NaN	NaN	NaN
9.94664	2.54873	-0.241357	9.81031	2.52234	-0.411249	NaN	NaN	NaN	NaN	NaN	NaN
9.94706	2.55856	-0.237593	9.8155	2.53483	-0.408511	NaN	NaN	NaN	NaN	NaN	NaN
9.94597	2.55289	-0.239772	9.81396	2.5312	-0.409825	NaN	NaN	NaN	NaN	NaN	NaN
9.94451	2.55767	-0.239204	9.81306	2.56276	-0.398681	NaN	NaN	NaN	NaN	NaN	NaN
9.95307	2.55663	-0.239787	9.81881	2.54494	-0.405163	NaN	NaN	NaN	NaN	NaN	NaN
9.97192	2.54444	-0.236693	9.83282	2.53611	-0.40983	NaN	NaN	NaN	NaN	NaN	NaN
9.98369	2.56125	-0.237086	9.83553	2.54194	-0.406512	NaN	NaN	NaN	NaN	NaN	NaN
9.98896	2.56258	-0.235952	9.83342	2.52541	-0.411195	NaN	NaN	NaN	NaN	NaN	NaN
9.98823	2.55843	-0.239392	9.8421	2.56462	-0.398115	NaN	NaN	NaN	NaN	NaN	NaN
10.0019	2.52566	-0.241627	9.84298	2.59568	-0.386684	NaN	NaN	NaN	NaN	NaN	NaN
10.0085	2.56577	-0.234951	9.84814	2.50583	-0.409141	NaN	NaN	NaN	NaN	NaN	NaN
10.0129	2.55363	-0.239967	9.85267	2.50508	-0.415854	NaN	NaN	NaN	NaN	NaN	NaN
10.0149	2.57416	-0.234733	9.85062	2.55246	-0.414041	NaN	NaN	NaN	NaN	NaN	NaN
10.0308	2.52964	-0.239591	9.86269	2.6341	-0.384542	NaN	NaN	NaN	NaN	NaN	NaN
10.0241	2.50817	-0.23669	9.86865	2.68005	-0.37687	NaN	NaN	NaN	NaN	NaN	NaN
10.0298	2.45007	-0.245564	9.87324	2.64607	-0.387022	NaN	NaN	NaN	NaN	NaN	NaN
10.0329	2.47171	-0.241288	9.88722	2.63166	-0.385234	NaN	NaN	NaN	NaN	NaN	NaN
10.0342	2.49364	-0.241424	9.88968	2.64532	-0.384268	NaN	NaN	NaN	NaN	NaN	NaN
10.0332	2.49664	-0.241701	9.88887	2.59417	-0.387765	NaN	NaN	NaN	NaN	NaN	NaN
10.0381	2.56829	-0.237743	9.89753	2.58118	-0.388576	NaN	NaN	NaN	NaN	NaN	NaN
10.0471	2.59276	-0.236308	9.89873	2.59953	-0.386848	NaN	NaN	NaN	NaN	NaN	NaN
10.0492	2.60279	-0.233062	9.90257	2.61053	-0.385179	NaN	NaN	NaN	NaN	NaN	NaN
10.0504	2.58189	-0.235609	9.90619	2.59125	-0.388518	NaN	NaN	NaN	NaN	NaN	NaN
10.0572	2.54317	-0.237327	9.92277	2.60441	-0.385751	NaN	NaN	NaN	NaN	NaN	NaN
10.0676	2.59671	-0.226388	9.92818	2.60148	-0.385997	NaN	NaN	NaN	NaN	NaN	NaN
10.0742	2.58739	-0.229703	9.92894	2.60164	-0.38636	NaN	NaN	NaN	NaN	NaN	NaN
10.0851	2.53061	-0.240021	9.92636	2.6063	-0.385906	NaN	NaN	NaN	NaN	NaN	NaN
10.0913	2.51166	-0.238683	9.93015	2.59878	-0.388483	NaN	NaN	NaN	NaN	NaN	NaN
10.0852	2.54462	-0.225781	9.94415	2.60954	-0.384872	NaN	NaN	NaN	NaN	NaN	NaN
10.0948	2.60677	-0.21489	9.94691	2.56643	-0.389437	NaN	NaN	NaN	NaN	NaN	NaN
10.0982	2.56856	-0.218562	9.95749	2.55139	-0.398722	NaN	NaN	NaN	NaN	NaN	NaN
10.1012	2.57474	-0.214835	9.95673	2.54245	-0.408523	NaN	NaN	NaN	NaN	NaN	NaN
10.1082	2.56256	-0.218395	9.96511	2.60411	-0.385949	NaN	NaN	NaN	NaN	NaN	NaN
10.1113	2.60861	-0.21516	9.97118	2.59472	-0.379582	NaN	NaN	NaN	NaN	NaN	NaN
10.1146	2.64259	-0.212941	9.97686	2.60862	-0.379408	NaN	NaN	NaN	NaN	NaN	NaN
10.114	2.65124	-0.21351	9.97539	2.60517	-0.385382	NaN	NaN	NaN	NaN	NaN	NaN
10.1251	2.60581	-0.22613	9.98265	2.61369	-0.385503	NaN	NaN	NaN	NaN	NaN	NaN
10.1266	2.58237	-0.234604	9.99341	2.56519	-0.388808	NaN	NaN	NaN	NaN	NaN	NaN
10.1291	2.51216	-0.238814	9.9957	2.53882	-0.389618	NaN	NaN	NaN	NaN	NaN	NaN
10.1392	2.53644	-0.228605	10.0052	2.53689	-0.390095	NaN	NaN	NaN	NaN	NaN	NaN
10.1479	2.56443	-0.219318	10.0047	2.53714	-0.389934	NaN	NaN	NaN	NaN	NaN	NaN
10.1522	2.5699	-0.217529	10.0136	2.57713	-0.386921	NaN	NaN	NaN	NaN	NaN	NaN
10.1534	2.57583	-0.21767	10.0218	2.57419	-0.388803	NaN	NaN	NaN	NaN	NaN	NaN
10.172	2.57642	-0.215799	10.0258	2.61415	-0.383716	NaN	NaN	NaN	NaN	NaN	NaN
10.1756	2.57843	-0.215209	10.0296	2.60551	-0.387494	NaN	NaN	NaN	NaN	NaN	NaN
10.1827	2.56272	-0.220433	10.0423	2.57118	-0.387565	NaN	NaN	NaN	NaN	NaN	NaN
10.1824	2.59114	-0.210767	10.043	2.5464	-0.387942	NaN	NaN	NaN	NaN	NaN	NaN
10.1824	2.58327	-0.213387	10.0417	2.54538	-0.388733	NaN	NaN	NaN	NaN	NaN	NaN
10.1905	2.57302	-0.218522	10.05	2.57528	-0.388102	NaN	NaN	NaN	NaN	NaN	NaN
10.1909	2.57195	-0.217964	10.0497	2.61084	-0.384872	NaN	NaN	NaN	NaN	NaN	NaN
10.1958	2.5783	-0.217592	10.0504	2.60982	-0.385281	NaN	NaN	NaN	NaN	NaN	NaN
10.2103	2.54643	-0.218963	10.0739	2.58794	-0.385832	NaN	NaN	NaN	NaN	NaN	NaN
10.2142	2.56916	-0.215993	10.0796	2.58809	-0.386945	NaN	NaN	NaN	NaN	NaN	NaN
10.214	2.5756	-0.216592	10.0795	2.6145	-0.384575	NaN	NaN	NaN	NaN	NaN	NaN
10.2209	2.54401	-0.21916	10.0872	2.63962	-0.374828	NaN	NaN	NaN	NaN	NaN	NaN
10.22	2.57077	-0.217164	10.09	2.60867	-0.376158	NaN	NaN	NaN	NaN	NaN	NaN
10.2328	2.57489	-0.217778	10.0903	2.63742	-0.373318	NaN	NaN	NaN	NaN	NaN	NaN
10.246	2.55209	-0.216667	10.0945	2.66968	-0.364588	NaN	NaN	NaN	NaN	NaN	NaN
10.2492	2.58784	-0.213736	10.1111	2.61977	-0.373841	NaN	NaN	NaN	NaN	NaN	NaN
10.2476	2.54433	-0.217442	10.1137	2.63655	-0.3739	NaN	NaN	NaN	NaN	NaN	NaN
10.2521	2.51129	-0.220511	10.1143	2.64706	-0.371685	NaN	NaN	NaN	NaN	NaN	NaN
10.2566	2.48633	-0.229596	10.1202	2.61164	-0.365758	NaN	NaN	NaN	NaN	NaN	NaN
10.2644	2.50053	-0.224825	10.1258	2.59969	-0.367338	NaN	NaN	NaN	NaN	NaN	NaN
10.2673	2.54896	-0.218719	10.1263	2.57871	-0.377503	NaN	NaN	NaN	NaN	NaN	NaN
10.2675	2.58011	-0.216351	10.1267	2.55013	-0.387726	NaN	NaN	NaN	NaN	NaN	NaN
10.2788	2.55427	-0.217705	10.1275	2.55242	-0.388154	NaN	NaN	NaN	NaN	NaN	NaN
10.2785	2.58638	-0.212865	10.1419	2.55538	-0.38636	NaN	NaN	NaN	NaN	NaN	NaN
10.279	2.58693	-0.215294	10.1558	2.57911	-0.377951	NaN	NaN	NaN	NaN	NaN	NaN
10.2837	2.55522	-0.216478	10.1573	2.59334	-0.37333	NaN	NaN	NaN	NaN	NaN	NaN
10.2867	2.58093	-0.21629	10.1554	2.615	-0.365374	NaN	NaN	NaN	NaN	NaN	NaN
10.2915	2.6152	-0.204722	10.1542	2.61349	-0.366166	NaN	NaN	NaN	NaN	NaN	NaN
10.3053	2.60416	-0.207667	10.1584	2.6188	-0.364959	NaN	NaN	NaN	NaN	NaN	NaN
10.3142	2.52088	-0.217742	10.1722	2.6118	-0.366904	NaN	NaN	NaN	NaN	NaN	NaN
10.319	2.5217	-0.216179	10.1727	2.62391	-0.3638	NaN	NaN	NaN	NaN	NaN	NaN
10.3224	2.54738	-0.207262	10.1812	2.61018	-0.367225	NaN	NaN	NaN	NaN	NaN	NaN
10.3286	2.61117	-0.197182	10.1833	2.60978	-0.366527	NaN	NaN	NaN	NaN	NaN	NaN
10.3355	2.62465	-0.191382	10.1921	2.61808	-0.364528	NaN	NaN	NaN	NaN	NaN	NaN
10.3446	2.59137	-0.193425	10.2009	2.61671	-0.365642	NaN	NaN	NaN	NaN	NaN	NaN
10.3481	2.59282	-0.192934	10.2016	2.61656	-0.365478	NaN	NaN	NaN	NaN	NaN	NaN
10.3458	2.57783	-0.198186	10.1995	2.64602	-0.354499	NaN	NaN	NaN	NaN	NaN	NaN
10.3508	2.587	-0.197666	10.1994	2.67927	-0.342972	NaN	NaN	NaN	NaN	NaN	NaN
10.3651	2.60529	-0.189626	10.2034	2.70594	-0.334476	NaN	NaN	NaN	NaN	NaN	NaN
10.3585	2.58053	-0.19647	10.2187	2.64803	-0.353527	NaN	NaN	NaN	NaN	NaN	NaN
10.371	2.58435	-0.197723	10.2196	2.65935	-0.350098	NaN	NaN	NaN	NaN	NaN	NaN
10.3678	2.57853	-0.19833	10.2184	2.67744	-0.343351	NaN	NaN	NaN	NaN	NaN	NaN
10.3772	2.55443	-0.198056	10.2184	2.68011	-0.343012	NaN	NaN	NaN	NaN	NaN	NaN
10.3795	2.61119	-0.196977	10.2333	2.65041	-0.354137	NaN	NaN	NaN	NaN	NaN	NaN
10.3918	2.58235	-0.197466	10.2402	2.58379	-0.367768	NaN	NaN	NaN	NaN	NaN	NaN
10.3949	2.55911	-0.195267	10.2395	2.6105	-0.366718	NaN	NaN	NaN	NaN	NaN	NaN
10.3956	2.52988	-0.195284	10.2414	2.64839	-0.354831	NaN	NaN	NaN	NaN	NaN	NaN
10.4053	2.49533	-0.202142	10.259	2.63223	-0.359648	NaN	NaN	NaN	NaN	NaN	NaN
10.4108	2.52436	-0.194552	10.2586	2.62036	-0.36476	NaN	NaN	NaN	NaN	NaN	NaN
10.4205	2.5233	-0.198834	10.2528	2.61641	-0.356116	NaN	NaN	NaN	NaN	NaN	NaN
10.4264	2.5653	-0.193107	10.2583	2.62685	-0.359549	NaN	NaN	NaN	NaN	NaN	NaN
10.4252	2.5213	-0.200311	10.2612	2.65154	-0.353437	NaN	NaN	NaN	NaN	NaN	NaN
10.4273	2.52343	-0.201643	10.275	2.68582	-0.342012	NaN	NaN	NaN	NaN	NaN	NaN
10.4295	2.52319	-0.199054	10.2753	2.69239	-0.340012	NaN	NaN	NaN	NaN	NaN	NaN
10.4334	2.55354	-0.198949	10.2803	2.64607	-0.354936	NaN	NaN	NaN	NaN	NaN	NaN
10.4436	2.55418	-0.199133	10.2869	2.61986	-0.365072	NaN	NaN	NaN	NaN	NaN	NaN
10.4488	2.58559	-0.19756	10.293	2.58602	-0.367311	NaN	NaN	NaN	NaN	NaN	NaN
10.448	2.58704	-0.196391	10.2966	2.58558	-0.357577	NaN	NaN	NaN	NaN	NaN	NaN
10.4547	2.61428	-0.177954	10.3022	2.60584	-0.350991	NaN	NaN	NaN	NaN	NaN	NaN
10.4635	2.6572	-0.172473	10.3052	2.61704	-0.347093	NaN	NaN	NaN	NaN	NaN	NaN
10.4687	2.62424	-0.172883	10.311	2.58921	-0.346549	NaN	NaN	NaN	NaN	NaN	NaN
10.4598	2.59217	-0.18355	10.3219	2.64464	-0.344862	NaN	NaN	NaN	NaN	NaN	NaN
10.4665	2.57712	-0.181746	10.3274	2.60264	-0.346812	NaN	NaN	NaN	NaN	NaN	NaN
10.4702	2.61878	-0.175825	10.3321	2.60675	-0.347128	NaN	NaN	NaN	NaN	NaN	NaN
10.4743	2.59601	-0.17709	10.3339	2.62013	-0.345532	NaN	NaN	NaN	NaN	NaN	NaN
10.4821	2.58262	-0.178166	10.3332	2.62134	-0.346062	NaN	NaN	NaN	NaN	NaN	NaN
10.48	2.61266	-0.176267	10.3368	2.65122	-0.33444	NaN	NaN	NaN	NaN	NaN	NaN
10.4822	2.61351	-0.176017	10.342	2.65311	-0.324896	NaN	NaN	NaN	NaN	NaN	NaN
10.4879	2.59487	-0.176297	10.3438	2.70982	-0.309412	NaN	NaN	NaN	NaN	NaN	NaN
10.5039	2.58325	-0.178822	10.3582	2.7083	-0.323938	NaN	NaN	NaN	NaN	NaN	NaN
10.5067	2.59321	-0.175919	10.3599	2.67833	-0.330214	NaN	NaN	NaN	NaN	NaN	NaN
10.5063	2.59423	-0.176103	10.3613	2.6172	-0.337344	NaN	NaN	NaN	NaN	NaN	NaN
10.5061	2.59642	-0.174504	10.362	2.6297	-0.336319	NaN	NaN	NaN	NaN	NaN	NaN
10.516	2.6184	-0.1772	10.3715	2.62346	-0.345374	NaN	NaN	NaN	NaN	NaN	NaN
10.5245	2.59888	-0.175598	10.3715	2.6257	-0.345807	NaN	NaN	NaN	NaN	NaN	NaN
10.5275	2.56018	-0.17642	10.3748	2.65778	-0.333544	NaN	NaN	NaN	NaN	NaN	NaN
10.5259	2.52289	-0.178773	10.3812	2.68508	-0.323762	NaN	NaN	NaN	NaN	NaN	NaN
10.5293	2.58318	-0.177161	10.3882	2.68547	-0.323945	NaN	NaN	NaN	NaN	NaN	NaN
10.5326	2.58901	-0.17791	10.389	2.65147	-0.325748	NaN	NaN	NaN	NaN	NaN	NaN
10.5368	2.59242	-0.177258	10.3889	2.66912	-0.324775	NaN	NaN	NaN	NaN	NaN	NaN
10.5458	2.59243	-0.177601	10.3968	2.68561	-0.323621	NaN	NaN	NaN	NaN	NaN	NaN
10.5569	2.60338	-0.172986	10.4085	2.65763	-0.323656	NaN	NaN	NaN	NaN	NaN	NaN
10.5634	2.60582	-0.173509	10.4102	2.62789	-0.325393	NaN	NaN	NaN	NaN	NaN	NaN
10.5581	2.57547	-0.173498	10.409	2.62892	-0.323625	NaN	NaN	NaN	NaN	NaN	NaN
10.5701	2.59037	-0.177926	10.4286	2.62659	-0.325766	NaN	NaN	NaN	NaN	NaN	NaN
10.5788	2.59492	-0.177481	10.4383	2.62962	-0.324976	NaN	NaN	NaN	NaN	NaN	NaN
10.5856	2.56609	-0.175898	10.4394	2.62364	-0.326263	NaN	NaN	NaN	NaN	NaN	NaN
10.5935	2.52384	-0.18032	10.4369	2.62626	-0.325623	NaN	NaN	NaN	NaN	NaN	NaN
10.5972	2.59196	-0.175501	10.4495	2.62498	-0.326516	NaN	NaN	NaN	NaN	NaN	NaN
10.6006	2.60504	-0.17436	10.4522	2.62985	-0.325468	NaN	NaN	NaN	NaN	NaN	NaN
10.6071	2.5958	-0.176073	10.4569	2.628	-0.325009	NaN	NaN	NaN	NaN	NaN	NaN
10.6127	2.57561	-0.171522	10.4535	2.66238	-0.313189	NaN	NaN	NaN	NaN	NaN	NaN
10.6249	2.53681	-0.179133	10.4539	2.68831	-0.304528	NaN	NaN	NaN	NaN	NaN	NaN
10.6356	2.53379	-0.177232	10.4534	2.68621	-0.305035	NaN	NaN	NaN	NaN	NaN	NaN
10.6408	2.54553	-0.170205	10.4593	2.65334	-0.305731	NaN	NaN	NaN	NaN	NaN	NaN
10.6473	2.5324	-0.180239	10.4764	2.58945	-0.319223	NaN	NaN	NaN	NaN	NaN	NaN
10.6412	2.57418	-0.16714	10.4784	2.56338	-0.328513	NaN	NaN	NaN	NaN	NaN	NaN
10.6425	2.55402	-0.163332	10.4786	2.56089	-0.329398	NaN	NaN	NaN	NaN	NaN	NaN
10.6445	2.59943	-0.155019	10.4768	2.59545	-0.316278	NaN	NaN	NaN	NaN	NaN	NaN
10.6456	2.59087	-0.158634	10.485	2.62036	-0.307521	NaN	NaN	NaN	NaN	NaN	NaN
10.6483	2.62887	-0.156657	10.4854	2.62713	-0.306381	NaN	NaN	NaN	NaN	NaN	NaN
10.6518	2.6623	-0.154881	10.49	2.6204	-0.307619	NaN	NaN	NaN	NaN	NaN	NaN
10.6551	2.62764	-0.156088	10.4993	2.6199	-0.308163	NaN	NaN	NaN	NaN	NaN	NaN
10.6649	2.61748	-0.148534	10.5111	2.59681	-0.317401	NaN	NaN	NaN	NaN	NaN	NaN
10.6686	2.60493	-0.152323	10.5184	2.60637	-0.313796	NaN	NaN	NaN	NaN	NaN	NaN
10.6872	2.59893	-0.156169	10.5224	2.62538	-0.30665	NaN	NaN	NaN	NaN	NaN	NaN
10.6851	2.60201	-0.142587	10.5207	2.62802	-0.305927	NaN	NaN	NaN	NaN	NaN	NaN
10.6866	2.58608	-0.140124	10.522	2.65044	-0.297929	NaN	NaN	NaN	NaN	NaN	NaN
10.687	2.57592	-0.141206	10.5316	2.63526	-0.303811	NaN	NaN	NaN	NaN	NaN	NaN
10.6835	2.59086	-0.139069	10.5329	2.62741	-0.306257	NaN	NaN	NaN	NaN	NaN	NaN
10.6984	2.56001	-0.150567	10.541	2.62532	-0.307604	NaN	NaN	NaN	NaN	NaN	NaN
10.7087	2.55109	-0.153228	10.5508	2.62649	-0.306356	NaN	NaN	NaN	NaN	NaN	NaN
10.702	2.59976	-0.147506	10.5519	2.63111	-0.30574	NaN	NaN	NaN	NaN	NaN	NaN
10.7083	2.63485	-0.135812	10.552	2.62684	-0.305218	NaN	NaN	NaN	NaN	NaN	NaN
10.7119	2.65297	-0.136329	10.5519	2.62588	-0.306774	NaN	NaN	NaN	NaN	NaN	NaN
10.7099	2.66026	-0.135484	10.5497	2.65792	-0.295921	NaN	NaN	NaN	NaN	NaN	NaN
10.7148	2.6315	-0.146414	10.5545	2.65632	-0.28664	NaN	NaN	NaN	NaN	NaN	NaN
10.7273	2.56801	-0.158009	10.559	2.67161	-0.285811	NaN	NaN	NaN	NaN	NaN	NaN
10.7364	2.54086	-0.158644	10.5727	2.68772	-0.284972	NaN	NaN	NaN	NaN	NaN	NaN
10.7391	2.5322	-0.158586	10.5787	2.65666	-0.286353	NaN	NaN	NaN	NaN	NaN	NaN
10.7389	2.54163	-0.155493	10.5815	2.6831	-0.284856	NaN	NaN	NaN	NaN	NaN	NaN
10.7368	2.54683	-0.154068	10.5843	2.69341	-0.283739	NaN	NaN	NaN	NaN	NaN	NaN
10.757	2.54262	-0.159982	10.5835	2.65486	-0.287357	NaN	NaN	NaN	NaN	NaN	NaN
10.7612	2.56623	-0.15116	10.5867	2.67469	-0.286194	NaN	NaN	NaN	NaN	NaN	NaN
10.7707	2.54194	-0.159235	10.5948	2.68766	-0.285576	NaN	NaN	NaN	NaN	NaN	NaN
10.7819	2.53837	-0.155012	10.5964	2.69314	-0.284006	NaN	NaN	NaN	NaN	NaN	NaN
10.7787	2.641	-0.134729	10.6021	2.66314	-0.284647	NaN	NaN	NaN	NaN	NaN	NaN
10.7824	2.66942	-0.134524	10.6061	2.67744	-0.285958	NaN	NaN	NaN	NaN	NaN	NaN
10.7768	2.68313	-0.131817	10.6059	2.70018	-0.281363	NaN	NaN	NaN	NaN	NaN	NaN
10.7863	2.59859	-0.139193	10.6238	2.65407	-0.286392	NaN	NaN	NaN	NaN	NaN	NaN
10.787	2.59938	-0.138172	10.6276	2.63052	-0.28718	NaN	NaN	NaN	NaN	NaN	NaN
10.787	2.60241	-0.137485	10.6283	2.62527	-0.287637	NaN	NaN	NaN	NaN	NaN	NaN
10.7905	2.6336	-0.126202	10.6301	2.65631	-0.277109	NaN	NaN	NaN	NaN	NaN	NaN
10.7934	2.66261	-0.116903	10.6415	2.64962	-0.280246	NaN	NaN	NaN	NaN	NaN	NaN
10.7965	2.66465	-0.114859	10.646	2.63392	-0.286714	NaN	NaN	NaN	NaN	NaN	NaN
10.8075	2.65739	-0.115931	10.6468	2.61785	-0.288246	NaN	NaN	NaN	NaN	NaN	NaN
10.8202	2.68822	-0.107158	10.6475	2.64216	-0.2843	NaN	NaN	NaN	NaN	NaN	NaN
10.8282	2.63574	-0.126759	10.6603	2.62403	-0.289323	NaN	NaN	NaN	NaN	NaN	NaN
10.8274	2.6692	-0.113704	10.6705	2.63153	-0.286763	NaN	NaN	NaN	NaN	NaN	NaN
10.8309	2.66106	-0.117522	10.6722	2.59725	-0.288678	NaN	NaN	NaN	NaN	NaN	NaN
10.8302	2.66483	-0.116984	10.6792	2.59772	-0.279553	NaN	NaN	NaN	NaN	NaN	NaN
10.8272	2.63476	-0.126878	10.6863	2.57578	-0.28664	NaN	NaN	NaN	NaN	NaN	NaN
10.8349	2.60606	-0.138616	10.6869	2.56895	-0.289454	NaN	NaN	NaN	NaN	NaN	NaN
10.8417	2.61427	-0.136397	10.6888	2.60621	-0.276919	NaN	NaN	NaN	NaN	NaN	NaN
10.8466	2.59424	-0.139329	10.6924	2.65701	-0.266787	NaN	NaN	NaN	NaN	NaN	NaN
10.8536	2.63345	-0.127083	10.6928	2.65091	-0.266726	NaN	NaN	NaN	NaN	NaN	NaN
10.8573	2.62345	-0.13096	10.6935	2.62404	-0.268819	NaN	NaN	NaN	NaN	NaN	NaN
10.8628	2.60102	-0.137942	10.7012	2.65509	-0.268298	NaN	NaN	NaN	NaN	NaN	NaN
10.8716	2.61298	-0.125197	10.7112	2.64337	-0.267743	NaN	NaN	NaN	NaN	NaN	NaN
10.8719	2.65556	-0.117282	10.7224	2.66397	-0.265932	NaN	NaN	NaN	NaN	NaN	NaN
10.871	2.65939	-0.115851	10.7212	2.63011	-0.269192	NaN	NaN	NaN	NaN	NaN	NaN
10.874	2.64646	-0.113315	10.719	2.64333	-0.265308	NaN	NaN	NaN	NaN	NaN	NaN
10.8849	2.65751	-0.116889	10.7389	2.65042	-0.269832	NaN	NaN	NaN	NaN	NaN	NaN
10.8934	2.62718	-0.118117	10.7497	2.64472	-0.266923	NaN	NaN	NaN	NaN	NaN	NaN
10.8984	2.60074	-0.116699	10.7516	2.62667	-0.268551	NaN	NaN	NaN	NaN	NaN	NaN
10.9033	2.63192	-0.117334	10.7538	2.63266	-0.268085	NaN	NaN	NaN	NaN	NaN	NaN
10.9139	2.62005	-0.114518	10.7591	2.63171	-0.268518	NaN	NaN	NaN	NaN	NaN	NaN
10.9077	2.61435	-0.116673	10.7593	2.63292	-0.267501	NaN	NaN	NaN	NaN	NaN	NaN
10.9132	2.61549	-0.116407	10.7589	2.64249	-0.26532	NaN	NaN	NaN	NaN	NaN	NaN
10.9194	2.60545	-0.118585	10.7746	2.63473	-0.266467	NaN	NaN	NaN	NaN	NaN	NaN
10.9166	2.60238	-0.119052	10.7789	2.63641	-0.267609	NaN	NaN	NaN	NaN	NaN	NaN
10.9225	2.63928	-0.107395	10.7796	2.63492	-0.267515	NaN	NaN	NaN	NaN	NaN	NaN
10.9278	2.61237	-0.115608	10.7783	2.63186	-0.268404	NaN	NaN	NaN	NaN	NaN	NaN
10.9345	2.61536	-0.11507	10.8017	2.63398	-0.268693	NaN	NaN	NaN	NaN	NaN	NaN
10.9401	2.59569	-0.120243	10.8076	2.63559	-0.267416	NaN	NaN	NaN	NaN	NaN	NaN
10.9519	2.61359	-0.114925	10.8073	2.63227	-0.26797	NaN	NaN	NaN	NaN	NaN	NaN
10.9585	2.60967	-0.116488	10.8053	2.64222	-0.26707	NaN	NaN	NaN	NaN	NaN	NaN
10.9643	2.60172	-0.115698	10.8108	2.62729	-0.269186	NaN	NaN	NaN	NaN	NaN	NaN
10.9662	2.60964	-0.118844	10.8156	2.63934	-0.267248	NaN	NaN	NaN	NaN	NaN	NaN
10.9629	2.63313	-0.10668	10.8175	2.63175	-0.268367	NaN	NaN	NaN	NaN	NaN	NaN
10.9766	2.68723	-0.091127	10.8152	2.63684	-0.267935	NaN	NaN	NaN	NaN	NaN	NaN
10.9831	2.66487	-0.09702	10.8153	2.63922	-0.267075	NaN	NaN	NaN	NaN	NaN	NaN
10.9817	2.66787	-0.096142	10.8231	2.66575	-0.256786	NaN	NaN	NaN	NaN	NaN	NaN
10.9853	2.68012	-0.095082	10.8272	2.71109	-0.242732	NaN	NaN	NaN	NaN	NaN	NaN
10.995	2.67677	-0.095322	10.8403	2.70436	-0.233262	NaN	NaN	NaN	NaN	NaN	NaN
11.0007	2.66866	-0.097713	10.8511	2.69498	-0.227291	NaN	NaN	NaN	NaN	NaN	NaN
10.9977	2.66611	-0.097592	10.8504	2.67203	-0.235114	NaN	NaN	NaN	NaN	NaN	NaN
11.0012	2.67161	-0.096272	10.8497	2.70462	-0.233366	NaN	NaN	NaN	NaN	NaN	NaN
11.0012	2.67166	-0.096652	10.8493	2.71436	-0.226385	NaN	NaN	NaN	NaN	NaN	NaN
11.0025	2.6368	-0.098603	10.8554	2.60845	-0.258844	NaN	NaN	NaN	NaN	NaN	NaN
11.0023	2.6593	-0.097578	10.8525	2.65342	-0.251144	NaN	NaN	NaN	NaN	NaN	NaN
11	2.68046	-0.093398	10.8508	2.65284	-0.246477	NaN	NaN	NaN	NaN	NaN	NaN
11.0021	2.66809	-0.096273	10.8572	2.6269	-0.250723	NaN	NaN	NaN	NaN	NaN	NaN
11.0078	2.6423	-0.097979	10.8674	2.63001	-0.250039	NaN	NaN	NaN	NaN	NaN	NaN
11.022	2.65682	-0.097396	10.8765	2.66857	-0.246787	NaN	NaN	NaN	NaN	NaN	NaN
11.0303	2.68243	-0.091748	10.8826	2.74011	-0.242106	NaN	NaN	NaN	NaN	NaN	NaN
11.0407	2.66898	-0.097409	10.8881	2.70229	-0.246016	NaN	NaN	NaN	NaN	NaN	NaN
11.0427	2.68581	-0.090962	10.8885	2.7052	-0.244375	NaN	NaN	NaN	NaN	NaN	NaN
11.0442	2.69208	-0.092013	10.8967	2.70618	-0.244585	NaN	NaN	NaN	NaN	NaN	NaN
11.0468	2.68424	-0.09511	10.9007	2.67835	-0.244341	NaN	NaN	NaN	NaN	NaN	NaN
11.0485	2.67563	-0.096585	10.8997	2.69163	-0.245326	NaN	NaN	NaN	NaN	NaN	NaN
11.0557	2.70977	-0.08488	10.8982	2.70151	-0.245219	NaN	NaN	NaN	NaN	NaN	NaN
11.0634	2.67061	-0.087	10.9088	2.66968	-0.247202	NaN	NaN	NaN	NaN	NaN	NaN
11.0755	2.61644	-0.0969	10.9189	2.68728	-0.246305	NaN	NaN	NaN	NaN	NaN	NaN
11.0827	2.61505	-0.097411	10.928	2.70375	-0.244601	NaN	NaN	NaN	NaN	NaN	NaN
11.083	2.64521	-0.095221	10.9288	2.67124	-0.246626	NaN	NaN	NaN	NaN	NaN	NaN
11.083	2.62714	-0.093633	10.9398	2.61025	-0.249202	NaN	NaN	NaN	NaN	NaN	NaN
11.0808	2.60713	-0.098637	10.9372	2.66037	-0.248004	NaN	NaN	NaN	NaN	NaN	NaN
11.0811	2.61399	-0.098684	10.9447	2.61265	-0.250041	NaN	NaN	NaN	NaN	NaN	NaN
11.091	2.605	-0.099762	10.9491	2.63105	-0.248905	NaN	NaN	NaN	NaN	NaN	NaN
11.1024	2.62239	-0.094946	10.9534	2.64008	-0.247855	NaN	NaN	NaN	NaN	NaN	NaN
11.1097	2.60595	-0.100476	10.9571	2.6436	-0.248075	NaN	NaN	NaN	NaN	NaN	NaN
11.1132	2.6253	-0.09258	10.9723	2.64271	-0.247028	NaN	NaN	NaN	NaN	NaN	NaN
11.121	2.62211	-0.097811	10.9751	2.68276	-0.24499	NaN	NaN	NaN	NaN	NaN	NaN
11.1392	2.63937	-0.09141	10.9759	2.68174	-0.244316	NaN	NaN	NaN	NaN	NaN	NaN
11.1331	2.63597	-0.089216	10.9744	2.70922	-0.244055	NaN	NaN	NaN	NaN	NaN	NaN
11.1366	2.62255	-0.096687	10.9734	2.70746	-0.244495	NaN	NaN	NaN	NaN	NaN	NaN
11.1368	2.61675	-0.098093	10.9889	2.67731	-0.246546	NaN	NaN	NaN	NaN	NaN	NaN
11.137	2.61788	-0.097487	10.9949	2.68962	-0.245803	NaN	NaN	NaN	NaN	NaN	NaN
11.1414	2.6119	-0.099919	10.9932	2.70936	-0.244825	NaN	NaN	NaN	NaN	NaN	NaN
11.1467	2.61083	-0.099364	10.9983	2.67598	-0.246377	NaN	NaN	NaN	NaN	NaN	NaN
11.1575	2.62643	-0.094403	11.0056	2.71227	-0.242976	NaN	NaN	NaN	NaN	NaN	NaN
11.1609	2.62592	-0.092574	11.0089	2.71063	-0.244087	NaN	NaN	NaN	NaN	NaN	NaN
11.1677	2.61295	-0.099087	11.0159	2.64272	-0.247944	NaN	NaN	NaN	NaN	NaN	NaN
11.173	2.61336	-0.096204	11.0097	2.6663	-0.237249	NaN	NaN	NaN	NaN	NaN	NaN
11.1726	2.64554	-0.088159	11.0191	2.61895	-0.247394	NaN	NaN	NaN	NaN	NaN	NaN
11.1878	2.63815	-0.091523	11.0266	2.67752	-0.245591	NaN	NaN	NaN	NaN	NaN	NaN
11.1893	2.61312	-0.098003	11.04	2.669	-0.245772	NaN	NaN	NaN	NaN	NaN	NaN
11.1943	2.61878	-0.099172	11.0446	2.65399	-0.245928	NaN	NaN	NaN	NaN	NaN	NaN
11.201	2.63047	-0.096108	11.0375	2.68926	-0.233515	NaN	NaN	NaN	NaN	NaN	NaN
11.2052	2.61032	-0.099228	11.0381	2.70328	-0.226572	NaN	NaN	NaN	NaN	NaN	NaN
11.2048	2.61631	-0.098368	11.0479	2.72015	-0.22295	NaN	NaN	NaN	NaN	NaN	NaN
11.2034	2.61726	-0.098953	11.0626	2.65052	-0.246914	NaN	NaN	NaN	NaN	NaN	NaN
11.2175	2.62105	-0.097074	11.0626	2.62897	-0.25398	NaN	NaN	NaN	NaN	NaN	NaN
11.2293	2.67826	-0.077401	11.074	2.67378	-0.239692	NaN	NaN	NaN	NaN	NaN	NaN
11.2328	2.69439	-0.071014	11.0808	2.6718	-0.240005	NaN	NaN	NaN	NaN	NaN	NaN
11.2433	2.62157	-0.095448	11.0803	2.65227	-0.246379	NaN	NaN	NaN	NaN	NaN	NaN
11.2455	2.63107	-0.092748	11.0828	2.65908	-0.245265	NaN	NaN	NaN	NaN	NaN	NaN
11.2505	2.61812	-0.099146	11.0907	2.65088	-0.24713	NaN	NaN	NaN	NaN	NaN	NaN
11.2559	2.62515	-0.096936	11.0916	2.61632	-0.249615	NaN	NaN	NaN	NaN	NaN	NaN
11.25	2.61618	-0.088905	11.099	2.64591	-0.246961	NaN	NaN	NaN	NaN	NaN	NaN
11.2584	2.55613	-0.101265	11.1002	2.65503	-0.24634	NaN	NaN	NaN	NaN	NaN	NaN
11.263	2.55386	-0.10174	11.1009	2.6214	-0.248184	NaN	NaN	NaN	NaN	NaN	NaN
11.263	2.62861	-0.087795	11.0988	2.64856	-0.247022	NaN	NaN	NaN	NaN	NaN	NaN
11.2668	2.64986	-0.092112	11.1078	2.66632	-0.244336	NaN	NaN	NaN	NaN	NaN	NaN
11.2731	2.5901	-0.099056	11.1214	2.6164	-0.24782	NaN	NaN	NaN	NaN	NaN	NaN
11.2749	2.55556	-0.101212	11.1288	2.58939	-0.249454	NaN	NaN	NaN	NaN	NaN	NaN
11.2737	2.61609	-0.078967	11.1302	2.58759	-0.249614	NaN	NaN	NaN	NaN	NaN	NaN
11.2822	2.66072	-0.074453	11.1389	2.5841	-0.251229	NaN	NaN	NaN	NaN	NaN	NaN
11.2903	2.63837	-0.075771	11.142	2.5923	-0.249458	NaN	NaN	NaN	NaN	NaN	NaN
11.2987	2.61296	-0.080391	11.1443	2.61962	-0.238444	NaN	NaN	NaN	NaN	NaN	NaN
11.2976	2.629	-0.084513	11.146	2.64819	-0.228741	NaN	NaN	NaN	NaN	NaN	NaN
11.2959	2.63123	-0.077358	11.149	2.59766	-0.248327	NaN	NaN	NaN	NaN	NaN	NaN
11.299	2.62002	-0.078647	11.1553	2.56118	-0.258766	NaN	NaN	NaN	NaN	NaN	NaN
11.3101	2.65897	-0.077597	11.1597	2.56569	-0.259089	NaN	NaN	NaN	NaN	NaN	NaN
11.3238	2.64939	-0.086038	11.1682	2.59477	-0.247549	NaN	NaN	NaN	NaN	NaN	NaN
11.3308	2.61641	-0.097564	11.1721	2.62859	-0.247077	NaN	NaN	NaN	NaN	NaN	NaN
11.3339	2.62368	-0.100963	11.1758	2.66216	-0.244993	NaN	NaN	NaN	NaN	NaN	NaN
11.3373	2.6337	-0.098074	11.1658	2.71284	-0.233716	NaN	NaN	NaN	NaN	NaN	NaN
11.342	2.64551	-0.095435	11.1721	2.65934	-0.244362	NaN	NaN	NaN	NaN	NaN	NaN
11.3464	2.64882	-0.091899	11.1909	2.62375	-0.247751	NaN	NaN	NaN	NaN	NaN	NaN
11.3558	2.59706	-0.099261	11.1983	2.59607	-0.248756	NaN	NaN	NaN	NaN	NaN	NaN
11.3605	2.66991	-0.082383	11.1998	2.59669	-0.248351	NaN	NaN	NaN	NaN	NaN	NaN
11.3702	2.6568	-0.078442	11.2047	2.6226	-0.239102	NaN	NaN	NaN	NaN	NaN	NaN
11.3763	2.6971	-0.071037	11.2168	2.61296	-0.243304	NaN	NaN	NaN	NaN	NaN	NaN
11.3758	2.67949	-0.077619	11.2182	2.5964	-0.248808	NaN	NaN	NaN	NaN	NaN	NaN
11.3775	2.68819	-0.076724	11.2211	2.59156	-0.250154	NaN	NaN	NaN	NaN	NaN	NaN
11.3879	2.67728	-0.07062	11.2292	2.6039	-0.24778	NaN	NaN	NaN	NaN	NaN	NaN
11.3949	2.65736	-0.084794	11.2358	2.59509	-0.248389	NaN	NaN	NaN	NaN	NaN	NaN
11.4023	2.64506	-0.081457	11.2368	2.58994	-0.250288	NaN	NaN	NaN	NaN	NaN	NaN
11.4039	2.61414	-0.080289	11.2301	2.59497	-0.249735	NaN	NaN	NaN	NaN	NaN	NaN
11.3996	2.65256	-0.077487	11.2476	2.59814	-0.24931	NaN	NaN	NaN	NaN	NaN	NaN
11.4061	2.62903	-0.081651	11.2552	2.60299	-0.247534	NaN	NaN	NaN	NaN	NaN	NaN
11.416	2.59627	-0.089731	11.2557	2.59972	-0.247694	NaN	NaN	NaN	NaN	NaN	NaN
11.4193	2.61596	-0.097452	11.2536	2.60594	-0.248118	NaN	NaN	NaN	NaN	NaN	NaN
11.4338	2.63033	-0.090211	11.2628	2.60387	-0.247583	NaN	NaN	NaN	NaN	NaN	NaN
11.4423	2.62615	-0.097876	11.2648	2.59344	-0.249445	NaN	NaN	NaN	NaN	NaN	NaN
11.4393	2.64478	-0.092916	11.2691	2.60409	-0.24778	NaN	NaN	NaN	NaN	NaN	NaN
11.4407	2.59808	-0.099652	11.2757	2.62757	-0.238631	NaN	NaN	NaN	NaN	NaN	NaN
11.446	2.59431	-0.099634	11.2863	2.65039	-0.24064	NaN	NaN	NaN	NaN	NaN	NaN
11.4527	2.56547	-0.101124	11.2888	2.66737	-0.245215	NaN	NaN	NaN	NaN	NaN	NaN
11.4544	2.56393	-0.10075	11.2838	2.71756	-0.233565	NaN	NaN	NaN	NaN	NaN	NaN
11.4515	2.60638	-0.095802	11.2825	2.67031	-0.23836	NaN	NaN	NaN	NaN	NaN	NaN
11.4549	2.60885	-0.086184	11.2923	2.63422	-0.256425	NaN	NaN	NaN	NaN	NaN	NaN
11.4592	2.62511	-0.080656	11.2946	2.63406	-0.246841	NaN	NaN	NaN	NaN	NaN	NaN
11.4654	2.68402	-0.069402	11.3023	2.66162	-0.24595	NaN	NaN	NaN	NaN	NaN	NaN
11.4713	2.70355	-0.073269	11.3066	2.66921	-0.245156	NaN	NaN	NaN	NaN	NaN	NaN
11.4797	2.66771	-0.087008	11.3126	2.67202	-0.243943	NaN	NaN	NaN	NaN	NaN	NaN
11.4847	2.63852	-0.096831	11.317	2.6694	-0.244572	NaN	NaN	NaN	NaN	NaN	NaN
11.4837	2.64782	-0.096788	11.3214	2.61238	-0.255517	NaN	NaN	NaN	NaN	NaN	NaN
11.4911	2.60965	-0.098137	11.3165	2.6521	-0.251967	NaN	NaN	NaN	NaN	NaN	NaN
11.4944	2.63969	-0.096772	11.3183	2.68977	-0.2358	NaN	NaN	NaN	NaN	NaN	NaN
11.5027	2.63852	-0.096459	11.3363	2.66267	-0.23861	NaN	NaN	NaN	NaN	NaN	NaN
11.5074	2.63492	-0.097366	11.3462	2.62478	-0.256339	NaN	NaN	NaN	NaN	NaN	NaN
11.5086	2.65425	-0.091123	11.3505	2.60219	-0.267922	NaN	NaN	NaN	NaN	NaN	NaN
11.5258	2.6027	-0.099379	11.3538	2.65683	-0.240853	NaN	NaN	NaN	NaN	NaN	NaN
11.5309	2.64586	-0.092578	11.3628	2.67841	-0.242118	NaN	NaN	NaN	NaN	NaN	NaN
11.536	2.64214	-0.094	11.3633	2.67998	-0.242786	NaN	NaN	NaN	NaN	NaN	NaN
11.5387	2.64692	-0.091922	11.3618	2.6677	-0.246067	NaN	NaN	NaN	NaN	NaN	NaN
11.5431	2.63518	-0.097115	11.373	2.66846	-0.245009	NaN	NaN	NaN	NaN	NaN	NaN
11.5482	2.65689	-0.091801	11.3818	2.67511	-0.245017	NaN	NaN	NaN	NaN	NaN	NaN
11.5625	2.65965	-0.089115	11.3814	2.64303	-0.244981	NaN	NaN	NaN	NaN	NaN	NaN
11.5663	2.66303	-0.089563	11.392	2.68234	-0.242288	NaN	NaN	NaN	NaN	NaN	NaN
11.5723	2.62629	-0.099477	11.403	2.63761	-0.247336	NaN	NaN	NaN	NaN	NaN	NaN
11.5703	2.65054	-0.094419	11.4106	2.67946	-0.242757	NaN	NaN	NaN	NaN	NaN	NaN
11.56	2.65189	-0.094589	11.4065	2.62341	-0.244703	NaN	NaN	NaN	NaN	NaN	NaN
11.5682	2.64207	-0.097314	11.4026	2.63595	-0.247286	NaN	NaN	NaN	NaN	NaN	NaN
11.5798	2.60937	-0.098513	11.4156	2.59202	-0.258027	NaN	NaN	NaN	NaN	NaN	NaN
11.5836	2.63695	-0.096066	11.4201	2.54883	-0.26908	NaN	NaN	NaN	NaN	NaN	NaN
11.5835	2.6402	-0.095733	11.4198	2.547	-0.269732	NaN	NaN	NaN	NaN	NaN	NaN
11.5949	2.60312	-0.108659	11.4236	2.61526	-0.257419	NaN	NaN	NaN	NaN	NaN	NaN
11.6028	2.59507	-0.113759	11.4318	2.656	-0.251488	NaN	NaN	NaN	NaN	NaN	NaN
11.6127	2.59156	-0.114785	11.4316	2.68187	-0.241923	NaN	NaN	NaN	NaN	NaN	NaN
11.6114	2.58879	-0.113756	11.4362	2.64725	-0.245251	NaN	NaN	NaN	NaN	NaN	NaN
11.6144	2.57614	-0.11835	11.4481	2.61132	-0.266038	NaN	NaN	NaN	NaN	NaN	NaN
[truncated: 1,032 more rows]

## Sheet: Control_afterConvection_Ind29_xyzpts
pt1_X	pt1_Y	pt1_Z	pt2_X	pt2_Y	pt2_Z	pt3_X	pt3_Y	pt3_Z	pt4_X	pt4_Y	pt4_Z
NaN	NaN	NaN	NaN	NaN	NaN	NaN	NaN	NaN	NaN	NaN	NaN
NaN	NaN	NaN	NaN	NaN	NaN	NaN	NaN	NaN	NaN	NaN	NaN
NaN	NaN	NaN	NaN	NaN	NaN	NaN	NaN	NaN	NaN	NaN	NaN
NaN	NaN	NaN	NaN	NaN	NaN	NaN	NaN	NaN	NaN	NaN	NaN
NaN	NaN	NaN	NaN	NaN	NaN	NaN	NaN	NaN	NaN	NaN	NaN
NaN	NaN	NaN	NaN	NaN	NaN	NaN	NaN	NaN	NaN	NaN	NaN
NaN	NaN	NaN	NaN	NaN	NaN	NaN	NaN	NaN	NaN	NaN	NaN
NaN	NaN	NaN	NaN	NaN	NaN	NaN	NaN	NaN	NaN	NaN	NaN
NaN	NaN	NaN	NaN	NaN	NaN	NaN	NaN	NaN	NaN	NaN	NaN
NaN	NaN	NaN	NaN	NaN	NaN	NaN	NaN	NaN	NaN	NaN	NaN
NaN	NaN	NaN	NaN	NaN	NaN	NaN	NaN	NaN	NaN	NaN	NaN
NaN	NaN	NaN	NaN	NaN	NaN	NaN	NaN	NaN	NaN	NaN	NaN
NaN	NaN	NaN	NaN	NaN	NaN	NaN	NaN	NaN	NaN	NaN	NaN
NaN	NaN	NaN	NaN	NaN	NaN	NaN	NaN	NaN	NaN	NaN	NaN
NaN	NaN	NaN	NaN	NaN	NaN	NaN	NaN	NaN	NaN	NaN	NaN
NaN	NaN	NaN	NaN	NaN	NaN	NaN	NaN	NaN	NaN	NaN	NaN
NaN	NaN	NaN	NaN	NaN	NaN	NaN	NaN	NaN	NaN	NaN	NaN
NaN	NaN	NaN	NaN	NaN	NaN	NaN	NaN	NaN	NaN	NaN	NaN
NaN	NaN	NaN	NaN	NaN	NaN	NaN	NaN	NaN	NaN	NaN	NaN
NaN	NaN	NaN	NaN	NaN	NaN	NaN	NaN	NaN	NaN	NaN	NaN
NaN	NaN	NaN	NaN	NaN	NaN	NaN	NaN	NaN	NaN	NaN	NaN
NaN	NaN	NaN	NaN	NaN	NaN	NaN	NaN	NaN	NaN	NaN	NaN
NaN	NaN	NaN	NaN	NaN	NaN	NaN	NaN	NaN	NaN	NaN	NaN
NaN	NaN	NaN	NaN	NaN	NaN	NaN	NaN	NaN	NaN	NaN	NaN
NaN	NaN	NaN	NaN	NaN	NaN	NaN	NaN	NaN	NaN	NaN	NaN
NaN	NaN	NaN	NaN	NaN	NaN	NaN	NaN	NaN	NaN	NaN	NaN
NaN	NaN	NaN	NaN	NaN	NaN	NaN	NaN	NaN	NaN	NaN	NaN
NaN	NaN	NaN	NaN	NaN	NaN	NaN	NaN	NaN	NaN	NaN	NaN
NaN	NaN	NaN	NaN	NaN	NaN	NaN	NaN	NaN	NaN	NaN	NaN
NaN	NaN	NaN	NaN	NaN	NaN	NaN	NaN	NaN	NaN	NaN	NaN
NaN	NaN	NaN	NaN	NaN	NaN	NaN	NaN	NaN	NaN	NaN	NaN
NaN	NaN	NaN	NaN	NaN	NaN	NaN	NaN	NaN	NaN	NaN	NaN
NaN	NaN	NaN	NaN	NaN	NaN	NaN	NaN	NaN	NaN	NaN	NaN
NaN	NaN	NaN	NaN	NaN	NaN	NaN	NaN	NaN	NaN	NaN	NaN
NaN	NaN	NaN	NaN	NaN	NaN	NaN	NaN	NaN	NaN	NaN	NaN
NaN	NaN	NaN	NaN	NaN	NaN	NaN	NaN	NaN	NaN	NaN	NaN
NaN	NaN	NaN	NaN	NaN	NaN	NaN	NaN	NaN	NaN	NaN	NaN
NaN	NaN	NaN	NaN	NaN	NaN	NaN	NaN	NaN	NaN	NaN	NaN
NaN	NaN	NaN	NaN	NaN	NaN	NaN	NaN	NaN	NaN	NaN	NaN
NaN	NaN	NaN	NaN	NaN	NaN	NaN	NaN	NaN	NaN	NaN	NaN
NaN	NaN	NaN	NaN	NaN	NaN	NaN	NaN	NaN	NaN	NaN	NaN
NaN	NaN	NaN	NaN	NaN	NaN	NaN	NaN	NaN	NaN	NaN	NaN
NaN	NaN	NaN	NaN	NaN	NaN	NaN	NaN	NaN	NaN	NaN	NaN
NaN	NaN	NaN	NaN	NaN	NaN	NaN	NaN	NaN	NaN	NaN	NaN
NaN	NaN	NaN	NaN	NaN	NaN	NaN	NaN	NaN	NaN	NaN	NaN
NaN	NaN	NaN	NaN	NaN	NaN	NaN	NaN	NaN	NaN	NaN	NaN
NaN	NaN	NaN	NaN	NaN	NaN	NaN	NaN	NaN	NaN	NaN	NaN
NaN	NaN	NaN	NaN	NaN	NaN	NaN	NaN	NaN	NaN	NaN	NaN
NaN	NaN	NaN	NaN	NaN	NaN	NaN	NaN	NaN	NaN	NaN	NaN
NaN	NaN	NaN	NaN	NaN	NaN	NaN	NaN	NaN	NaN	NaN	NaN
NaN	NaN	NaN	NaN	NaN	NaN	NaN	NaN	NaN	NaN	NaN	NaN
NaN	NaN	NaN	NaN	NaN	NaN	NaN	NaN	NaN	NaN	NaN	NaN
NaN	NaN	NaN	NaN	NaN	NaN	NaN	NaN	NaN	NaN	NaN	NaN
NaN	NaN	NaN	NaN	NaN	NaN	NaN	NaN	NaN	NaN	NaN	NaN
NaN	NaN	NaN	NaN	NaN	NaN	NaN	NaN	NaN	NaN	NaN	NaN
NaN	NaN	NaN	NaN	NaN	NaN	NaN	NaN	NaN	NaN	NaN	NaN
NaN	NaN	NaN	NaN	NaN	NaN	NaN	NaN	NaN	NaN	NaN	NaN
NaN	NaN	NaN	NaN	NaN	NaN	NaN	NaN	NaN	NaN	NaN	NaN
NaN	NaN	NaN	NaN	NaN	NaN	NaN	NaN	NaN	NaN	NaN	NaN
NaN	NaN	NaN	NaN	NaN	NaN	NaN	NaN	NaN	NaN	NaN	NaN
NaN	NaN	NaN	NaN	NaN	NaN	NaN	NaN	NaN	NaN	NaN	NaN
NaN	NaN	NaN	NaN	NaN	NaN	NaN	NaN	NaN	NaN	NaN	NaN
NaN	NaN	NaN	NaN	NaN	NaN	NaN	NaN	NaN	NaN	NaN	NaN
NaN	NaN	NaN	NaN	NaN	NaN	NaN	NaN	NaN	NaN	NaN	NaN
NaN	NaN	NaN	NaN	NaN	NaN	NaN	NaN	NaN	NaN	NaN	NaN
NaN	NaN	NaN	NaN	NaN	NaN	NaN	NaN	NaN	NaN	NaN	NaN
NaN	NaN	NaN	NaN	NaN	NaN	NaN	NaN	NaN	NaN	NaN	NaN
NaN	NaN	NaN	NaN	NaN	NaN	NaN	NaN	NaN	NaN	NaN	NaN
NaN	NaN	NaN	NaN	NaN	NaN	NaN	NaN	NaN	NaN	NaN	NaN
NaN	NaN	NaN	NaN	NaN	NaN	NaN	NaN	NaN	NaN	NaN	NaN
NaN	NaN	NaN	NaN	NaN	NaN	NaN	NaN	NaN	NaN	NaN	NaN
NaN	NaN	NaN	NaN	NaN	NaN	NaN	NaN	NaN	NaN	NaN	NaN
NaN	NaN	NaN	NaN	NaN	NaN	NaN	NaN	NaN	NaN	NaN	NaN
NaN	NaN	NaN	NaN	NaN	NaN	NaN	NaN	NaN	NaN	NaN	NaN
NaN	NaN	NaN	NaN	NaN	NaN	NaN	NaN	NaN	NaN	NaN	NaN
NaN	NaN	NaN	NaN	NaN	NaN	NaN	NaN	NaN	NaN	NaN	NaN
NaN	NaN	NaN	NaN	NaN	NaN	NaN	NaN	NaN	NaN	NaN	NaN
NaN	NaN	NaN	NaN	NaN	NaN	NaN	NaN	NaN	NaN	NaN	NaN
NaN	NaN	NaN	NaN	NaN	NaN	NaN	NaN	NaN	NaN	NaN	NaN
NaN	NaN	NaN	NaN	NaN	NaN	NaN	NaN	NaN	NaN	NaN	NaN
NaN	NaN	NaN	NaN	NaN	NaN	NaN	NaN	NaN	NaN	NaN	NaN
NaN	NaN	NaN	NaN	NaN	NaN	NaN	NaN	NaN	NaN	NaN	NaN
NaN	NaN	NaN	NaN	NaN	NaN	NaN	NaN	NaN	NaN	NaN	NaN
NaN	NaN	NaN	NaN	NaN	NaN	NaN	NaN	NaN	NaN	NaN	NaN
NaN	NaN	NaN	NaN	NaN	NaN	NaN	NaN	NaN	NaN	NaN	NaN
NaN	NaN	NaN	NaN	NaN	NaN	NaN	NaN	NaN	NaN	NaN	NaN
NaN	NaN	NaN	NaN	NaN	NaN	NaN	NaN	NaN	NaN	NaN	NaN
NaN	NaN	NaN	NaN	NaN	NaN	NaN	NaN	NaN	NaN	NaN	NaN
NaN	NaN	NaN	NaN	NaN	NaN	NaN	NaN	NaN	NaN	NaN	NaN
NaN	NaN	NaN	NaN	NaN	NaN	NaN	NaN	NaN	NaN	NaN	NaN
NaN	NaN	NaN	NaN	NaN	NaN	NaN	NaN	NaN	NaN	NaN	NaN
NaN	NaN	NaN	NaN	NaN	NaN	NaN	NaN	NaN	NaN	NaN	NaN
NaN	NaN	NaN	NaN	NaN	NaN	NaN	NaN	NaN	NaN	NaN	NaN
NaN	NaN	NaN	NaN	NaN	NaN	NaN	NaN	NaN	NaN	NaN	NaN
NaN	NaN	NaN	NaN	NaN	NaN	NaN	NaN	NaN	NaN	NaN	NaN
NaN	NaN	NaN	NaN	NaN	NaN	NaN	NaN	NaN	NaN	NaN	NaN
NaN	NaN	NaN	NaN	NaN	NaN	NaN	NaN	NaN	NaN	NaN	NaN
NaN	NaN	NaN	NaN	NaN	NaN	NaN	NaN	NaN	NaN	NaN	NaN
NaN	NaN	NaN	NaN	NaN	NaN	NaN	NaN	NaN	NaN	NaN	NaN
NaN	NaN	NaN	NaN	NaN	NaN	NaN	NaN	NaN	NaN	NaN	NaN
NaN	NaN	NaN	NaN	NaN	NaN	NaN	NaN	NaN	NaN	NaN	NaN
NaN	NaN	NaN	NaN	NaN	NaN	NaN	NaN	NaN	NaN	NaN	NaN
NaN	NaN	NaN	NaN	NaN	NaN	NaN	NaN	NaN	NaN	NaN	NaN
NaN	NaN	NaN	NaN	NaN	NaN	NaN	NaN	NaN	NaN	NaN	NaN
NaN	NaN	NaN	NaN	NaN	NaN	NaN	NaN	NaN	NaN	NaN	NaN
NaN	NaN	NaN	NaN	NaN	NaN	NaN	NaN	NaN	NaN	NaN	NaN
NaN	NaN	NaN	NaN	NaN	NaN	NaN	NaN	NaN	NaN	NaN	NaN
NaN	NaN	NaN	NaN	NaN	NaN	NaN	NaN	NaN	NaN	NaN	NaN
NaN	NaN	NaN	NaN	NaN	NaN	NaN	NaN	NaN	NaN	NaN	NaN
NaN	NaN	NaN	NaN	NaN	NaN	NaN	NaN	NaN	NaN	NaN	NaN
NaN	NaN	NaN	NaN	NaN	NaN	NaN	NaN	NaN	NaN	NaN	NaN
NaN	NaN	NaN	NaN	NaN	NaN	NaN	NaN	NaN	NaN	NaN	NaN
NaN	NaN	NaN	NaN	NaN	NaN	NaN	NaN	NaN	NaN	NaN	NaN
NaN	NaN	NaN	NaN	NaN	NaN	NaN	NaN	NaN	NaN	NaN	NaN
NaN	NaN	NaN	NaN	NaN	NaN	NaN	NaN	NaN	NaN	NaN	NaN
NaN	NaN	NaN	NaN	NaN	NaN	NaN	NaN	NaN	NaN	NaN	NaN
NaN	NaN	NaN	NaN	NaN	NaN	NaN	NaN	NaN	NaN	NaN	NaN
NaN	NaN	NaN	NaN	NaN	NaN	NaN	NaN	NaN	NaN	NaN	NaN
NaN	NaN	NaN	NaN	NaN	NaN	NaN	NaN	NaN	NaN	NaN	NaN
NaN	NaN	NaN	NaN	NaN	NaN	NaN	NaN	NaN	NaN	NaN	NaN
NaN	NaN	NaN	NaN	NaN	NaN	NaN	NaN	NaN	NaN	NaN	NaN
NaN	NaN	NaN	NaN	NaN	NaN	NaN	NaN	NaN	NaN	NaN	NaN
NaN	NaN	NaN	NaN	NaN	NaN	NaN	NaN	NaN	NaN	NaN	NaN
NaN	NaN	NaN	NaN	NaN	NaN	NaN	NaN	NaN	NaN	NaN	NaN
NaN	NaN	NaN	NaN	NaN	NaN	NaN	NaN	NaN	NaN	NaN	NaN
NaN	NaN	NaN	NaN	NaN	NaN	NaN	NaN	NaN	NaN	NaN	NaN
NaN	NaN	NaN	NaN	NaN	NaN	NaN	NaN	NaN	NaN	NaN	NaN
NaN	NaN	NaN	NaN	NaN	NaN	NaN	NaN	NaN	NaN	NaN	NaN
NaN	NaN	NaN	NaN	NaN	NaN	NaN	NaN	NaN	NaN	NaN	NaN
NaN	NaN	NaN	NaN	NaN	NaN	NaN	NaN	NaN	NaN	NaN	NaN
NaN	NaN	NaN	NaN	NaN	NaN	NaN	NaN	NaN	NaN	NaN	NaN
NaN	NaN	NaN	NaN	NaN	NaN	NaN	NaN	NaN	NaN	NaN	NaN
NaN	NaN	NaN	NaN	NaN	NaN	NaN	NaN	NaN	NaN	NaN	NaN
NaN	NaN	NaN	NaN	NaN	NaN	NaN	NaN	NaN	NaN	NaN	NaN
NaN	NaN	NaN	NaN	NaN	NaN	NaN	NaN	NaN	NaN	NaN	NaN
NaN	NaN	NaN	NaN	NaN	NaN	NaN	NaN	NaN	NaN	NaN	NaN
NaN	NaN	NaN	NaN	NaN	NaN	NaN	NaN	NaN	NaN	NaN	NaN
NaN	NaN	NaN	NaN	NaN	NaN	NaN	NaN	NaN	NaN	NaN	NaN
NaN	NaN	NaN	NaN	NaN	NaN	NaN	NaN	NaN	NaN	NaN	NaN
NaN	NaN	NaN	NaN	NaN	NaN	NaN	NaN	NaN	NaN	NaN	NaN
NaN	NaN	NaN	NaN	NaN	NaN	NaN	NaN	NaN	NaN	NaN	NaN
NaN	NaN	NaN	NaN	NaN	NaN	NaN	NaN	NaN	NaN	NaN	NaN
NaN	NaN	NaN	NaN	NaN	NaN	NaN	NaN	NaN	NaN	NaN	NaN
NaN	NaN	NaN	NaN	NaN	NaN	NaN	NaN	NaN	NaN	NaN	NaN
NaN	NaN	NaN	NaN	NaN	NaN	NaN	NaN	NaN	NaN	NaN	NaN
NaN	NaN	NaN	NaN	NaN	NaN	NaN	NaN	NaN	NaN	NaN	NaN
NaN	NaN	NaN	NaN	NaN	NaN	NaN	NaN	NaN	NaN	NaN	NaN
NaN	NaN	NaN	NaN	NaN	NaN	NaN	NaN	NaN	NaN	NaN	NaN
NaN	NaN	NaN	NaN	NaN	NaN	NaN	NaN	NaN	NaN	NaN	NaN
NaN	NaN	NaN	NaN	NaN	NaN	NaN	NaN	NaN	NaN	NaN	NaN
NaN	NaN	NaN	NaN	NaN	NaN	NaN	NaN	NaN	NaN	NaN	NaN
NaN	NaN	NaN	NaN	NaN	NaN	NaN	NaN	NaN	NaN	NaN	NaN
NaN	NaN	NaN	NaN	NaN	NaN	NaN	NaN	NaN	NaN	NaN	NaN
NaN	NaN	NaN	NaN	NaN	NaN	NaN	NaN	NaN	NaN	NaN	NaN
NaN	NaN	NaN	NaN	NaN	NaN	NaN	NaN	NaN	NaN	NaN	NaN
NaN	NaN	NaN	NaN	NaN	NaN	NaN	NaN	NaN	NaN	NaN	NaN
NaN	NaN	NaN	NaN	NaN	NaN	NaN	NaN	NaN	NaN	NaN	NaN
NaN	NaN	NaN	NaN	NaN	NaN	NaN	NaN	NaN	NaN	NaN	NaN
NaN	NaN	NaN	NaN	NaN	NaN	NaN	NaN	NaN	NaN	NaN	NaN
NaN	NaN	NaN	NaN	NaN	NaN	NaN	NaN	NaN	NaN	NaN	NaN
NaN	NaN	NaN	NaN	NaN	NaN	NaN	NaN	NaN	NaN	NaN	NaN
NaN	NaN	NaN	NaN	NaN	NaN	NaN	NaN	NaN	NaN	NaN	NaN
NaN	NaN	NaN	NaN	NaN	NaN	NaN	NaN	NaN	NaN	NaN	NaN
NaN	NaN	NaN	NaN	NaN	NaN	NaN	NaN	NaN	NaN	NaN	NaN
NaN	NaN	NaN	NaN	NaN	NaN	NaN	NaN	NaN	NaN	NaN	NaN
NaN	NaN	NaN	NaN	NaN	NaN	NaN	NaN	NaN	NaN	NaN	NaN
NaN	NaN	NaN	NaN	NaN	NaN	NaN	NaN	NaN	NaN	NaN	NaN
NaN	NaN	NaN	NaN	NaN	NaN	NaN	NaN	NaN	NaN	NaN	NaN
NaN	NaN	NaN	NaN	NaN	NaN	NaN	NaN	NaN	NaN	NaN	NaN
NaN	NaN	NaN	NaN	NaN	NaN	NaN	NaN	NaN	NaN	NaN	NaN
NaN	NaN	NaN	NaN	NaN	NaN	NaN	NaN	NaN	NaN	NaN	NaN
NaN	NaN	NaN	NaN	NaN	NaN	NaN	NaN	NaN	NaN	NaN	NaN
NaN	NaN	NaN	NaN	NaN	NaN	NaN	NaN	NaN	NaN	NaN	NaN
NaN	NaN	NaN	NaN	NaN	NaN	NaN	NaN	NaN	NaN	NaN	NaN
NaN	NaN	NaN	NaN	NaN	NaN	NaN	NaN	NaN	NaN	NaN	NaN
NaN	NaN	NaN	NaN	NaN	NaN	NaN	NaN	NaN	NaN	NaN	NaN
NaN	NaN	NaN	NaN	NaN	NaN	NaN	NaN	NaN	NaN	NaN	NaN
NaN	NaN	NaN	NaN	NaN	NaN	NaN	NaN	NaN	NaN	NaN	NaN
NaN	NaN	NaN	NaN	NaN	NaN	NaN	NaN	NaN	NaN	NaN	NaN
NaN	NaN	NaN	NaN	NaN	NaN	NaN	NaN	NaN	NaN	NaN	NaN
NaN	NaN	NaN	NaN	NaN	NaN	NaN	NaN	NaN	NaN	NaN	NaN
NaN	NaN	NaN	NaN	NaN	NaN	NaN	NaN	NaN	NaN	NaN	NaN
NaN	NaN	NaN	NaN	NaN	NaN	NaN	NaN	NaN	NaN	NaN	NaN
NaN	NaN	NaN	NaN	NaN	NaN	NaN	NaN	NaN	NaN	NaN	NaN
NaN	NaN	NaN	NaN	NaN	NaN	NaN	NaN	NaN	NaN	NaN	NaN
NaN	NaN	NaN	NaN	NaN	NaN	NaN	NaN	NaN	NaN	NaN	NaN
NaN	NaN	NaN	NaN	NaN	NaN	NaN	NaN	NaN	NaN	NaN	NaN
NaN	NaN	NaN	NaN	NaN	NaN	NaN	NaN	NaN	NaN	NaN	NaN
NaN	NaN	NaN	NaN	NaN	NaN	NaN	NaN	NaN	NaN	NaN	NaN
NaN	NaN	NaN	NaN	NaN	NaN	NaN	NaN	NaN	NaN	NaN	NaN
NaN	NaN	NaN	NaN	NaN	NaN	NaN	NaN	NaN	NaN	NaN	NaN
NaN	NaN	NaN	NaN	NaN	NaN	NaN	NaN	NaN	NaN	NaN	NaN
NaN	NaN	NaN	NaN	NaN	NaN	NaN	NaN	NaN	NaN	NaN	NaN
NaN	NaN	NaN	NaN	NaN	NaN	NaN	NaN	NaN	NaN	NaN	NaN
NaN	NaN	NaN	NaN	NaN	NaN	NaN	NaN	NaN	NaN	NaN	NaN
NaN	NaN	NaN	NaN	NaN	NaN	NaN	NaN	NaN	NaN	NaN	NaN
NaN	NaN	NaN	NaN	NaN	NaN	NaN	NaN	NaN	NaN	NaN	NaN
NaN	NaN	NaN	NaN	NaN	NaN	NaN	NaN	NaN	NaN	NaN	NaN
NaN	NaN	NaN	NaN	NaN	NaN	NaN	NaN	NaN	NaN	NaN	NaN
NaN	NaN	NaN	NaN	NaN	NaN	NaN	NaN	NaN	NaN	NaN	NaN
NaN	NaN	NaN	NaN	NaN	NaN	NaN	NaN	NaN	NaN	NaN	NaN
NaN	NaN	NaN	NaN	NaN	NaN	NaN	NaN	NaN	NaN	NaN	NaN
NaN	NaN	NaN	NaN	NaN	NaN	NaN	NaN	NaN	NaN	NaN	NaN
NaN	NaN	NaN	NaN	NaN	NaN	NaN	NaN	NaN	NaN	NaN	NaN
NaN	NaN	NaN	NaN	NaN	NaN	NaN	NaN	NaN	NaN	NaN	NaN
NaN	NaN	NaN	NaN	NaN	NaN	NaN	NaN	NaN	NaN	NaN	NaN
NaN	NaN	NaN	NaN	NaN	NaN	NaN	NaN	NaN	NaN	NaN	NaN
NaN	NaN	NaN	NaN	NaN	NaN	NaN	NaN	NaN	NaN	NaN	NaN
NaN	NaN	NaN	NaN	NaN	NaN	NaN	NaN	NaN	NaN	NaN	NaN
NaN	NaN	NaN	NaN	NaN	NaN	NaN	NaN	NaN	NaN	NaN	NaN
NaN	NaN	NaN	NaN	NaN	NaN	NaN	NaN	NaN	NaN	NaN	NaN
NaN	NaN	NaN	NaN	NaN	NaN	NaN	NaN	NaN	NaN	NaN	NaN
-4.27806	2.74597	1.16681	-4.45327	2.71496	1.29203	-4.29178	2.77228	1.25887	-4.18515	2.72052	1.4296
-4.26483	2.76557	1.15908	-4.43525	2.76055	1.30063	-4.29847	2.74302	1.24397	-4.18255	2.68328	1.41333
-4.24914	2.8037	1.16009	-4.41809	2.77592	1.31005	-4.26123	2.82165	1.26444	-4.18141	2.58639	1.36695
-4.24565	2.80099	1.15951	-4.42621	2.75139	1.305	-4.25041	2.84778	1.27256	-4.1666	2.63104	1.3622
-4.24049	2.80271	1.1603	-4.43491	2.72592	1.31111	-4.25483	2.82643	1.26619	-4.21152	2.593	1.31311
-4.2568	2.7359	1.15692	-4.41001	2.69367	1.29932	-4.24213	2.82719	1.27357	-4.2602	2.52846	1.20854
-4.23173	2.76642	1.16941	-4.40269	2.74654	1.30991	-4.25936	2.76752	1.27253	-4.32749	2.52624	1.11627
-4.21315	2.80108	1.18052	-4.39318	2.72338	1.30877	-4.25917	2.76751	1.27254	-4.36972	2.4842	1.04167
-4.21832	2.77586	1.17294	-4.37849	2.75244	1.31097	-4.25853	2.77196	1.27384	-4.27021	2.70702	1.02073
-4.21366	2.74491	1.1791	-4.36363	2.76227	1.31998	-4.25286	2.76942	1.27251	-4.23678	2.73896	1.03455
-4.21619	2.73164	1.17553	-4.34269	2.81525	1.32932	-4.23679	2.77357	1.27467	-4.24472	2.63685	1.01601
-4.21904	2.71523	1.17062	-4.33821	2.79292	1.32333	-4.22463	2.75269	1.26885	-4.27069	2.6025	1.02664
-4.19613	2.72943	1.18323	-4.3466	2.74684	1.32829	-4.24284	2.68796	1.26916	-4.32796	2.56954	1.03053
-4.16759	2.76045	1.1831	-4.35033	2.73011	1.31815	-4.24184	2.69029	1.26917	-4.32176	2.62236	1.11536
-4.17403	2.72881	1.17361	-4.35035	2.71684	1.31388	-4.213	2.72079	1.27324	-4.26256	2.71208	1.29356
-4.16353	2.74363	1.17849	-4.3247	2.75877	1.32	-4.18559	2.76069	1.2733	-4.14668	2.73667	1.4431
-4.16342	2.73411	1.17575	-4.30265	2.78904	1.32891	-4.19077	2.7437	1.26814	-4.16552	2.536	1.41271
-4.13865	2.75396	1.17915	-4.28862	2.80648	1.32017	-4.16622	2.74595	1.26807	-4.12843	2.55962	1.40858
-4.12865	2.72083	1.17504	-4.28545	2.79555	1.33006	-4.15968	2.75065	1.26981	-4.08806	2.59908	1.41314
-4.12039	2.73247	1.1789	-4.2775	2.79188	1.3295	-4.15611	2.76389	1.27379	-4.11583	2.57181	1.41277
-4.12558	2.70071	1.17532	-4.27744	2.77021	1.31577	-4.12696	2.7766	1.27467	-4.31917	2.15606	1.29374
-4.10033	2.7352	1.18515	-4.28154	2.71452	1.31171	-4.11671	2.78506	1.27189	-4.30847	2.35375	1.21404
-4.09202	2.74186	1.17621	-4.27528	2.72699	1.31561	-4.11435	2.79004	1.27345	-4.28681	2.43144	1.15301
-4.07577	2.74742	1.17758	-4.28487	2.70766	1.30956	-4.10553	2.77195	1.27247	-4.21692	2.57852	1.03427
-4.07243	2.74404	1.1768	-4.2451	2.74664	1.32093	-4.10391	2.77018	1.27137	-4.16208	2.59722	1.01954
-4.08449	2.67994	1.17833	-4.22762	2.75758	1.32405	-4.08784	2.81203	1.28428	-4.09169	2.67919	1.02856
-4.0842	2.66644	1.17447	-4.19224	2.80803	1.32563	-4.0614	2.83917	1.293	-4.11547	2.55798	1.03472
-4.0825	2.64898	1.18011	-4.18694	2.80962	1.3264	-4.07736	2.76844	1.28324	-4.06338	2.65455	1.06576
-4.07791	2.65043	1.17744	-4.18308	2.79145	1.32737	-4.06889	2.76394	1.2877	-4.24658	2.37204	1.05915
-4.05544	2.69571	1.17935	-4.15726	2.82178	1.32907	-4.05318	2.76906	1.2794	-4.25045	2.49275	1.14106
-4.06193	2.62998	1.16757	-4.16946	2.77388	1.31475	-4.05829	2.72977	1.27385	-4.15218	2.61407	1.2938
-4.03355	2.6793	1.17166	-4.17927	2.72602	1.3075	-4.05823	2.72848	1.27348	-4.09706	2.55191	1.3675
-4.02044	2.70164	1.17888	-4.14839	2.76862	1.3133	-4.05598	2.71995	1.2712	-4.07981	2.45138	1.36978
-4.00369	2.72324	1.17433	-4.13728	2.76781	1.30548	-4.03398	2.73369	1.27033	-3.98347	2.56784	1.40578
-4.0021	2.6801	1.1588	-4.10888	2.79601	1.32005	-4.03441	2.70093	1.26097	-3.94265	2.63308	1.42157
-3.98255	2.68167	1.1517	-4.09065	2.82774	1.31635	-4.01866	2.68669	1.25175	-3.8947	2.80476	1.4154
-3.96921	2.68195	1.15183	-4.10245	2.77236	1.3127	-4.01488	2.66742	1.24644	-4.02839	2.63753	1.35975
-3.94206	2.72427	1.15575	-4.10173	2.77488	1.31346	-3.97663	2.71285	1.25109	-4.03849	2.71959	1.26358
-3.94157	2.69766	1.15498	-4.08818	2.77157	1.31333	-3.96619	2.7195	1.25358	-4.13111	2.50621	1.0959
-3.91868	2.73087	1.15761	-4.05275	2.79265	1.30738	-3.97087	2.68518	1.25074	-4.05239	2.57852	1.01605
-3.91885	2.71977	1.16033	-4.05424	2.76066	1.30676	-3.96807	2.68379	1.2505	-3.98079	2.58556	0.997664
-3.89927	2.75059	1.16239	-4.05587	2.74034	1.29964	-3.95634	2.70249	1.25652	-3.94006	2.62308	1.02166
-3.91163	2.69332	1.1564	-4.05823	2.69992	1.28802	-3.95353	2.67891	1.24124	-3.91723	2.66577	1.03627
-3.90231	2.70352	1.1659	-4.0365	2.71826	1.29458	-3.947	2.68068	1.24377	-3.96433	2.72389	1.05608
-3.88399	2.6966	1.16338	-4.02634	2.69442	1.28692	-3.93617	2.66897	1.23614	-4.08554	2.54171	1.14249
-3.88544	2.67569	1.1466	-4.02099	2.70823	1.29117	-3.92543	2.66928	1.23573	-4.03735	2.58615	1.27463
-3.87692	2.67422	1.13694	-4.01293	2.71413	1.29333	-3.89149	2.6925	1.2338	-4.02079	2.48654	1.32443
-3.84787	2.69834	1.13489	-3.99982	2.72952	1.28673	-3.8817	2.69189	1.23421	-3.88307	2.60676	1.37884
-3.81375	2.73908	1.13586	-3.96238	2.78171	1.29225	-3.86292	2.69027	1.23196	-3.82406	2.60673	1.39115
-3.83757	2.64315	1.11557	-3.96609	2.75627	1.28479	-3.82596	2.73597	1.23014	-3.80726	2.65586	1.40454
-3.82682	2.61833	1.11017	-3.93646	2.78748	1.28418	-3.83156	2.71201	1.22292	-3.80755	2.76453	1.37823
-3.82683	2.61189	1.1083	-3.9489	2.72602	1.27617	-3.84077	2.66069	1.21179	-3.77242	2.98465	1.31359
-3.83357	2.58139	1.09905	-3.91159	2.78042	1.27058	-3.82184	2.67279	1.21193	-3.88666	2.70122	1.19535
-3.83006	2.55796	1.09198	-3.90667	2.78398	1.27189	-3.82515	2.66245	1.21598	-3.99107	2.33834	1.0481
-3.82043	2.52168	1.08937	-3.91618	2.75388	1.26271	-3.80434	2.67442	1.21604	-3.8585	2.5172	0.985506
-3.79881	2.52786	1.0887	-3.9076	2.72567	1.25564	-3.79657	2.6702	1.21303	-3.80764	2.45747	0.962399
-3.80905	2.50011	1.07842	-3.90116	2.70827	1.25445	-3.76552	2.72598	1.21745	-3.79411	2.50593	0.990624
-3.79996	2.48471	1.07956	-3.90331	2.66785	1.2487	-3.7658	2.71071	1.21302	-3.86818	2.36625	0.999828
-3.77956	2.50376	1.08022	-3.85457	2.78072	1.25563	-3.76157	2.69672	1.20919	-3.97905	2.24939	1.01308
-3.76521	2.51085	1.08968	-3.85284	2.76166	1.24976	-3.74895	2.69038	1.20743	-3.96683	2.3615	1.07939
-3.72671	2.54038	1.07587	-3.84017	2.75994	1.24407	-3.76255	2.64772	1.19432	-3.93108	2.37319	1.17667
-3.70774	2.53827	1.07721	-3.82519	2.74785	1.23745	-3.73496	2.64518	1.19196	-3.79116	2.60726	1.32204
-3.66921	2.59691	1.0898	-3.82969	2.71861	1.2288	-3.69346	2.69502	1.1933	-3.75306	2.52426	1.36049
-3.67249	2.56053	1.07899	-3.8272	2.68821	1.20858	-3.69928	2.66159	1.18361	-3.71166	2.54845	1.3843
-3.65852	2.56079	1.07794	-3.79147	2.72382	1.20979	-3.69459	2.60983	1.17356	-3.67162	2.5514	1.38428
-3.64598	2.56859	1.07901	-3.759	2.7686	1.21184	-3.65673	2.69892	1.18565	-3.69031	2.54261	1.35317
-3.63123	2.5806	1.08372	-3.78866	2.66519	1.18349	-3.64848	2.68356	1.17693	-3.76528	2.46709	1.30967
-3.61906	2.56494	1.07894	-3.80092	2.60979	1.17227	-3.64115	2.65365	1.17497	-3.83001	2.33054	1.16095
-3.61199	2.54799	1.07133	-3.76626	2.64975	1.16744	-3.63475	2.64563	1.17301	-3.77983	2.33915	1.03477
-3.61024	2.51623	1.0609	-3.75586	2.63519	1.15694	-3.60261	2.68337	1.17569	-3.66038	2.42334	0.982892
-3.58064	2.53325	1.0681	-3.757	2.62071	1.15404	-3.59789	2.65655	1.16591	-3.56413	2.47984	1.00588
-3.57291	2.51757	1.06165	-3.75232	2.63656	1.15888	-3.60911	2.60912	1.15665	-3.53962	2.49509	0.999379
-3.55604	2.51675	1.06261	-3.72008	2.69801	1.15765	-3.59652	2.62907	1.15955	-3.59017	2.45173	1.00189
-3.52133	2.54762	1.06298	-3.69215	2.72294	1.15461	-3.56502	2.65263	1.15632	-3.68438	2.41278	1.03561
-3.5157	2.54543	1.07123	-3.6784	2.72079	1.1562	-3.56016	2.64311	1.15808	-3.73581	2.3688	1.12694
-3.51626	2.51445	1.06231	-3.67293	2.7236	1.15735	-3.53367	2.66215	1.1591	-3.67579	2.50102	1.29504
-3.49132	2.52365	1.06306	-3.67801	2.65134	1.12763	-3.52286	2.63925	1.15788	-3.5414	2.74158	1.33442
-3.477	2.52284	1.06294	-3.67749	2.61765	1.11688	-3.50523	2.63702	1.1479	-3.46483	2.86054	1.34681
-3.44683	2.55191	1.06157	-3.61397	2.71871	1.11775	-3.49867	2.63865	1.13819	-3.47585	2.78502	1.32745
-3.43301	2.56048	1.06437	-3.59697	2.71314	1.11535	-3.49302	2.64351	1.13992	-3.48149	2.79367	1.27757
-3.4258	2.5705	1.05672	-3.61367	2.62135	1.08632	-3.48223	2.63682	1.13882	-3.49793	2.79109	1.21236
-3.41671	2.54956	1.06042	-3.62586	2.55447	1.0784	-3.43977	2.6919	1.14068	-3.50464	2.73066	1.10838
-3.38461	2.59456	1.06475	-3.58954	2.59801	1.0775	-3.45092	2.64757	1.12715	-3.4098	2.79891	0.986804
-3.39255	2.51755	1.04736	-3.58524	2.60216	1.08018	-3.40302	2.70661	1.1189	-3.41362	2.62038	0.884474
-3.38137	2.51032	1.03408	-3.56137	2.62196	1.0799	-3.3952	2.69759	1.11643	-3.30933	2.68177	0.881791
-3.38225	2.4814	1.02754	-3.54462	2.64191	1.08013	-3.3849	2.67479	1.10869	-3.27266	2.6522	0.904941
-3.38799	2.43221	1.02423	-3.5261	2.64647	1.08077	-3.39333	2.61524	1.09118	-3.2746	2.54792	0.899252
-3.3569	2.45452	1.03595	-3.53937	2.56215	1.04793	-3.36179	2.63562	1.08319	-3.2726	2.65364	0.897282
-3.33072	2.47049	1.04192	-3.52384	2.56121	1.0411	-3.32008	2.6967	1.08079	-3.36253	2.65316	0.928528
-3.31657	2.47889	1.04178	-3.51956	2.53857	1.03384	-3.34755	2.616	1.07714	-3.43925	2.68815	0.99747
-3.31295	2.44649	1.03562	-3.5186	2.50658	1.02321	-3.33655	2.63088	1.08211	-3.39538	2.81243	1.11813
-3.30325	2.45966	1.04039	-3.48544	2.5599	1.02144	-3.32121	2.66174	1.08292	-3.29811	2.90379	1.22963
-3.26585	2.51736	1.04496	-3.45394	2.60132	1.02227	-3.29421	2.66808	1.08154	-3.31891	2.81671	1.20574
-3.24915	2.53815	1.04224	-3.43836	2.59319	1.01902	-3.27916	2.68515	1.08119	-3.42542	2.46058	1.11701
-3.23519	2.50755	1.04122	-3.44454	2.51938	1.00182	-3.26437	2.69474	1.0731	-3.38556	2.59765	1.00465
-3.20712	2.52774	1.03099	-3.42278	2.52428	1.00319	-3.23635	2.66825	1.06293	-3.25553	2.73408	0.902089
-3.18301	2.54448	1.02461	-3.38709	2.56841	1.00417	-3.2143	2.69636	1.06098	-3.21776	2.60967	0.800708
-3.18143	2.49554	1.02004	-3.398	2.5239	0.985808	-3.20791	2.70356	1.06347	-3.13531	2.57753	0.799869
-3.16907	2.4914	1.0073	-3.3812	2.525	0.985536	-3.2073	2.64281	1.03542	-3.07202	2.57501	0.83116
-3.16104	2.48655	1.00513	-3.35604	2.54166	0.984857	-3.19716	2.60641	1.02282	-3.06971	2.46636	0.844637
-3.14577	2.49555	1.00666	-3.34957	2.53611	0.983592	-3.17952	2.59788	1.02007	-3.06023	2.50332	0.857337
-3.14119	2.48486	1.00288	-3.33956	2.51672	0.965326	-3.15504	2.61505	1.02471	-3.07057	2.5694	0.78892
-3.13048	2.45692	0.993144	-3.31538	2.53571	0.963532	-3.13241	2.6507	1.02404	-3.11057	2.76057	0.829757
-3.10944	2.46287	0.985237	-3.28318	2.56763	0.962422	-3.16089	2.57425	1.00414	-3.22074	2.70111	0.868143
-3.08766	2.47363	0.978098	-3.27482	2.56997	0.952466	-3.15397	2.5332	0.990297	-3.22949	2.68245	0.963702
-3.08093	2.43916	0.967431	-3.25766	2.56768	0.947997	-3.15083	2.50956	0.983528	-3.2979	2.40033	0.955951
-3.07039	2.4237	0.965109	-3.24017	2.56109	0.948541	-3.12987	2.51586	0.974314	-3.11596	2.78241	1.11052
-3.05594	2.42146	0.963001	-3.20083	2.62045	0.947657	-3.12552	2.4948	0.964336	-3.07205	2.87352	1.11969
-3.0314	2.43811	0.966979	-3.21571	2.56348	0.929888	-3.09358	2.54656	0.965012	-3.07433	2.85682	1.01176
-3.01274	2.43485	0.96778	-3.1939	2.552	0.926899	-3.07238	2.53262	0.965649	-3.03871	2.72443	0.884218
-3.00345	2.42227	0.962745	-3.18394	2.54778	0.92903	-3.05008	2.52401	0.966442	-2.99941	2.63982	0.79074
-2.9862	2.44081	0.967328	-3.14988	2.60106	0.931502	-3.02393	2.56201	0.968304	-2.93201	2.57675	0.742825
-2.97136	2.44022	0.957264	-3.14432	2.56621	0.910759	-3.03637	2.51043	0.958025	-2.89439	2.49716	0.749379
-2.94524	2.44196	0.947902	-3.1253	2.56228	0.908237	-3.03507	2.4587	0.934699	-2.83233	2.54873	0.777809
-2.92652	2.44262	0.944655	-3.0844	2.61062	0.912795	-3.0138	2.44074	0.927142	-2.8445	2.4956	0.776506
-2.93197	2.3922	0.929685	-3.11071	2.53253	0.890397	-3.00388	2.42249	0.923286	-2.83915	2.56296	0.777669
-2.92636	2.37606	0.925738	-3.08871	2.5765	0.890739	-2.97614	2.43949	0.926346	-2.93319	2.48359	0.733707
-2.93609	2.32482	0.90525	-3.11208	2.47065	0.867506	-2.96746	2.44285	0.917928	-2.90019	2.78625	0.827748
-2.9079	2.35103	0.904869	-3.07703	2.50399	0.868742	-2.95467	2.45298	0.909341	-2.86614	2.95592	0.91082
-2.87496	2.402	0.910351	-3.03497	2.55625	0.874231	-2.93933	2.46316	0.909175	-3.04022	2.46488	0.926316
-2.86517	2.3913	0.910148	-3.02933	2.52319	0.873921	-2.93721	2.4215	0.909919	-3.03956	2.31425	0.880908
-2.83699	2.39559	0.899092	-3.00942	2.51978	0.872079	-2.90594	2.45558	0.900104	-3.03142	2.29095	0.892618
-2.82257	2.38268	0.886512	-3.00033	2.51839	0.872203	-2.90493	2.41926	0.890609	-2.9019	2.60194	0.924689
-2.80196	2.38866	0.887963	-2.98889	2.4893	0.853368	-2.889	2.41854	0.878167	-2.83562	2.68827	0.864876
-2.79316	2.38947	0.889316	-2.95119	2.52665	0.855676	-2.89767	2.32651	0.858606	-2.75974	2.57631	0.747597
-2.76843	2.40547	0.890738	-2.92517	2.52742	0.854766	-2.87814	2.32905	0.850324	-2.6884	2.54795	0.711084
-2.77048	2.34458	0.872446	-2.91461	2.53061	0.854878	-2.85468	2.33989	0.852002	-2.67351	2.43049	0.682708
-2.75237	2.3555	0.86622	-2.90515	2.52048	0.853214	-2.81496	2.38522	0.849917	-2.63351	2.44529	0.713057
-2.71541	2.40781	0.87101	-2.90653	2.46706	0.825427	-2.81394	2.36174	0.84295	-2.61787	2.43471	0.712832
-2.71006	2.38112	0.860065	-2.89548	2.46082	0.812714	-2.80695	2.34222	0.830363	-2.60599	2.50208	0.67986
-2.70708	2.34997	0.851888	-2.87635	2.47083	0.814729	-2.77425	2.3562	0.831258	-2.73345	2.38352	0.631962
-2.6748	2.37232	0.847684	-2.85455	2.46474	0.811538	-2.76666	2.34045	0.829359	-2.76092	2.57525	0.697063
-2.64423	2.40227	0.847283	-2.83601	2.4757	0.814751	-2.75766	2.35383	0.832822	-2.70758	2.75185	0.807704
-2.62181	2.4109	0.848806	-2.81294	2.47682	0.814625	-2.74125	2.35741	0.833556	-2.74355	2.60806	0.876444
-2.61983	2.36031	0.824893	-2.82637	2.38484	0.786456	-2.73987	2.31484	0.822061	-2.77165	2.45763	0.908319
-2.6052	2.35656	0.81466	-2.8287	2.33334	0.771516	-2.73311	2.28081	0.812077	-2.72119	2.48902	0.940359
-2.58706	2.35752	0.813903	-2.78886	2.37739	0.773899	-2.70223	2.31399	0.810198	-2.61216	2.75999	0.92386
-2.55976	2.39631	0.815762	-2.75355	2.42502	0.778001	-2.64965	2.40922	0.803547	-2.63628	2.62813	0.815525
-2.54451	2.39722	0.806604	-2.73677	2.4266	0.778723	-2.62661	2.39772	0.795445	-2.57463	2.6241	0.73384
-2.53705	2.37002	0.795815	-2.75409	2.35684	0.755932	-2.6391	2.33864	0.791987	-2.44774	2.61114	0.662537
-2.53064	2.33141	0.795443	-2.73607	2.37107	0.75064	-2.61918	2.36247	0.795536	-2.41702	2.48402	0.653242
-2.49792	2.36104	0.794374	-2.7129	2.39456	0.754693	-2.58682	2.36823	0.785089	-2.35968	2.48438	0.680345
-2.46982	2.40731	0.797778	-2.70889	2.39036	0.753652	-2.56231	2.36701	0.776847	-2.35753	2.38878	0.681696
-2.43974	2.44703	0.798296	-2.68533	2.38797	0.73426	-2.53171	2.39199	0.77523	-2.349	2.46292	0.682959
-2.44618	2.38958	0.781321	-2.65515	2.4239	0.735841	-2.50907	2.39979	0.764953	-2.37748	2.47192	0.618197
-2.44	2.3763	0.776906	-2.63946	2.40271	0.737364	-2.51286	2.34479	0.756914	-2.46719	2.51964	0.597884
-2.42866	2.33894	0.763801	-2.6184	2.42205	0.733177	-2.49894	2.37183	0.752566	-2.53373	2.53411	0.663756
-2.41609	2.30885	0.753897	-2.60523	2.38426	0.706053	-2.5001	2.37294	0.754671	-2.52664	2.63201	0.771743
-2.40113	2.31045	0.755796	-2.59674	2.37227	0.698399	-2.4731	2.37815	0.757204	-2.54577	2.56632	0.852869
-2.38274	2.31929	0.756539	-2.57785	2.37661	0.696258	-2.45361	2.37769	0.756323	-2.52483	2.51052	0.906748
-2.3621	2.32057	0.757083	-2.55875	2.37568	0.698051	-2.43379	2.38054	0.757512	-2.523	2.48541	0.903643
-2.32517	2.34592	0.746262	-2.53606	2.36935	0.695846	NaN	NaN	NaN	NaN	NaN	NaN
-2.30645	2.33049	0.741548	-2.49669	2.43027	0.704353	NaN	NaN	NaN	NaN	NaN	NaN
-2.29111	2.31606	0.737408	-2.51988	2.31661	0.65735	NaN	NaN	NaN	NaN	NaN	NaN
-2.28116	2.29293	0.727534	-2.50155	2.31886	0.660493	NaN	NaN	NaN	NaN	NaN	NaN
-2.27864	2.25021	0.713547	-2.48118	2.32666	0.660806	NaN	NaN	NaN	NaN	NaN	NaN
-2.2654	2.24854	0.711528	-2.43662	2.39504	0.661615	NaN	NaN	NaN	NaN	NaN	NaN
-2.23837	2.27956	0.718263	-2.41841	2.3981	0.662178	NaN	NaN	NaN	NaN	NaN	NaN
-2.22437	2.27991	0.718677	-2.37659	2.46897	0.665303	NaN	NaN	NaN	NaN	NaN	NaN
-2.20218	2.30448	0.719094	-2.39498	2.34902	0.620607	NaN	NaN	NaN	NaN	NaN	NaN
-2.17431	2.30083	0.705678	-2.38308	2.33371	0.617459	NaN	NaN	NaN	NaN	NaN	NaN
-2.15626	2.29482	0.704375	-2.34596	2.38399	0.626264	NaN	NaN	NaN	NaN	NaN	NaN
-2.15003	2.27382	0.698561	-2.35546	2.30365	0.592149	NaN	NaN	NaN	NaN	NaN	NaN
-2.13232	2.2801	0.699016	-2.33688	2.28963	0.584434	NaN	NaN	NaN	NaN	NaN	NaN
-2.12358	2.25471	0.690019	-2.31792	2.27634	0.5793	NaN	NaN	NaN	NaN	NaN	NaN
-2.11998	2.21749	0.679157	-2.30594	2.25901	0.575577	NaN	NaN	NaN	NaN	NaN	NaN
-2.09361	2.22463	0.6792	-2.29462	2.23037	0.563868	NaN	NaN	NaN	NaN	NaN	NaN
-2.07491	2.23659	0.682841	-2.2702	2.25192	0.561383	NaN	NaN	NaN	NaN	NaN	NaN
-2.04494	2.28517	0.680372	-2.24084	2.27846	0.560483	NaN	NaN	NaN	NaN	NaN	NaN
-2.015	2.33999	0.684911	-2.21057	2.33056	0.563716	NaN	NaN	NaN	NaN	NaN	NaN
-2.00629	2.32706	0.671241	-2.18543	2.3546	0.568842	NaN	NaN	NaN	NaN	NaN	NaN
-1.99678	2.3054	0.664261	-2.14854	2.40145	0.570354	NaN	NaN	NaN	NaN	NaN	NaN
-1.98367	2.29527	0.66264	-2.15233	2.31012	0.529733	NaN	NaN	NaN	NaN	NaN	NaN
-1.97153	2.26845	0.653263	-2.1355	2.32186	0.526438	NaN	NaN	NaN	NaN	NaN	NaN
-1.96561	2.24069	0.64442	-2.11924	2.30813	0.526274	NaN	NaN	NaN	NaN	NaN	NaN
-1.92397	2.29796	0.650704	-2.10235	2.30225	0.525605	NaN	NaN	NaN	NaN	NaN	NaN
-1.90662	2.30342	0.644421	-2.07722	2.29132	0.50856	NaN	NaN	NaN	NaN	NaN	NaN
-1.89542	2.30954	0.643675	-2.05295	2.30338	0.505925	NaN	NaN	NaN	NaN	NaN	NaN
-1.88603	2.30603	0.645519	-2.03925	2.28923	0.502668	NaN	NaN	NaN	NaN	NaN	NaN
-1.87366	2.30481	0.644456	-2.04005	2.22849	0.482234	NaN	NaN	NaN	NaN	NaN	NaN
-1.84437	2.33728	0.644692	-1.99988	2.28447	0.480113	NaN	NaN	NaN	NaN	NaN	NaN
-1.82591	2.35034	0.639049	-1.97565	2.29002	0.473276	NaN	NaN	NaN	NaN	NaN	NaN
-1.80823	2.37462	0.641463	-1.9482	2.32651	0.482499	NaN	NaN	NaN	NaN	NaN	NaN
-1.78761	2.39283	0.647869	-1.9266	2.34755	0.479748	NaN	NaN	NaN	NaN	NaN	NaN
-1.79775	2.3184	0.627977	-1.91101	2.33385	0.474289	NaN	NaN	NaN	NaN	NaN	NaN
-1.78347	2.29765	0.61954	-1.91299	2.30021	0.462925	NaN	NaN	NaN	NaN	NaN	NaN
-1.74036	2.36118	0.62116	-1.90268	2.281	0.454834	NaN	NaN	NaN	NaN	NaN	NaN
-1.72138	2.3561	0.605124	-1.88239	2.27489	0.453191	NaN	NaN	NaN	NaN	NaN	NaN
-1.71246	2.36424	0.603205	-1.88956	2.24065	0.442174	NaN	NaN	NaN	NaN	NaN	NaN
-1.72077	2.2994	0.590259	-1.87504	2.24311	0.430215	NaN	NaN	NaN	NaN	NaN	NaN
-1.70392	2.30244	0.583496	-1.84934	2.25633	0.424442	NaN	NaN	NaN	NaN	NaN	NaN
-1.69569	2.27153	0.570149	-1.83838	2.23975	0.41403	NaN	NaN	NaN	NaN	NaN	NaN
-1.68211	2.25085	0.564553	-1.82198	2.22486	0.400743	NaN	NaN	NaN	NaN	NaN	NaN
-1.65154	2.28845	0.56437	-1.80381	2.22054	0.394936	NaN	NaN	NaN	NaN	NaN	NaN
-1.61594	2.34298	0.571038	-1.78706	2.22151	0.395835	NaN	NaN	NaN	NaN	NaN	NaN
-1.60513	2.34976	0.571495	-1.76417	2.26516	0.405324	NaN	NaN	NaN	NaN	NaN	NaN
-1.58694	2.3417	0.570493	-1.75984	2.23943	0.398103	NaN	NaN	NaN	NaN	NaN	NaN
-1.57603	2.30939	0.559955	-1.73535	2.2563	0.395254	NaN	NaN	NaN	NaN	NaN	NaN
-1.57905	2.27239	0.550606	-1.70677	2.2937	0.397823	NaN	NaN	NaN	NaN	NaN	NaN
-1.55961	2.26619	0.54461	-1.68559	2.29722	0.397285	NaN	NaN	NaN	NaN	NaN	NaN
-1.54161	2.2811	0.547392	-1.66946	2.30818	0.399188	NaN	NaN	NaN	NaN	NaN	NaN
-1.5093	2.31644	0.550751	-1.67118	2.29759	0.395891	NaN	NaN	NaN	NaN	NaN	NaN
-1.49588	2.31256	0.542271	-1.66587	2.29973	0.386766	NaN	NaN	NaN	NaN	NaN	NaN
-1.47689	2.31525	0.534385	-1.64096	2.30216	0.375077	NaN	NaN	NaN	NaN	NaN	NaN
-1.46853	2.29146	0.531269	-1.61996	2.31447	0.369999	NaN	NaN	NaN	NaN	NaN	NaN
-1.45153	2.28551	0.530981	-1.60493	2.31238	0.36161	NaN	NaN	NaN	NaN	NaN	NaN
-1.42957	2.29499	0.522735	-1.58254	2.3102	0.359935	NaN	NaN	NaN	NaN	NaN	NaN
-1.4083	2.30308	0.514827	-1.56611	2.31284	0.360607	NaN	NaN	NaN	NaN	NaN	NaN
-1.39083	2.3002	0.511588	-1.54034	2.34046	0.359717	NaN	NaN	NaN	NaN	NaN	NaN
-1.38126	2.29947	0.502912	-1.50689	2.384	0.36198	NaN	NaN	NaN	NaN	NaN	NaN
-1.36263	2.30075	0.494308	-1.50238	2.35487	0.36134	NaN	NaN	NaN	NaN	NaN	NaN
-1.34607	2.29557	0.489781	-1.50038	2.34616	0.362732	NaN	NaN	NaN	NaN	NaN	NaN
-1.34101	2.27139	0.484227	-1.4921	2.31426	0.360588	NaN	NaN	NaN	NaN	NaN	NaN
-1.32748	2.26948	0.472446	-1.4731	2.31446	0.359723	NaN	NaN	NaN	NaN	NaN	NaN
-1.28434	2.34691	0.46699	-1.43982	2.35383	0.362133	NaN	NaN	NaN	NaN	NaN	NaN
-1.30202	2.28403	0.454283	-1.41949	2.39412	0.363776	NaN	NaN	NaN	NaN	NaN	NaN
-1.29286	2.28111	0.442106	-1.3998	2.40021	0.36003	NaN	NaN	NaN	NaN	NaN	NaN
-1.28002	2.2733	0.437812	-1.42617	2.29526	0.328415	NaN	NaN	NaN	NaN	NaN	NaN
-1.2526	2.2819	0.444906	-1.41626	2.2812	0.320256	NaN	NaN	NaN	NaN	NaN	NaN
-1.25029	2.2479	0.434037	-1.40187	2.26909	0.310638	NaN	NaN	NaN	NaN	NaN	NaN
-1.2361	2.25021	0.434706	-1.37916	2.27553	0.304324	NaN	NaN	NaN	NaN	NaN	NaN
-1.20385	2.29742	0.437641	-1.36047	2.27196	0.301822	NaN	NaN	NaN	NaN	NaN	NaN
-1.17289	2.33097	0.4408	-1.35688	2.23917	0.292025	NaN	NaN	NaN	NaN	NaN	NaN
-1.15336	2.33327	0.43906	-1.35049	2.21302	0.281416	NaN	NaN	NaN	NaN	NaN	NaN
-1.14853	2.30026	0.428979	-1.33014	2.24063	0.279014	NaN	NaN	NaN	NaN	NaN	NaN
-1.14079	2.29538	0.418716	-1.30215	2.2783	0.282572	NaN	NaN	NaN	NaN	NaN	NaN
-1.13403	2.29266	0.406981	-1.28285	2.28086	0.28333	NaN	NaN	NaN	NaN	NaN	NaN
-1.1189	2.29665	0.403278	-1.26612	2.28842	0.286815	NaN	NaN	NaN	NaN	NaN	NaN
-1.08942	2.3089	0.410776	-1.24368	2.31467	0.285927	NaN	NaN	NaN	NaN	NaN	NaN
-1.07947	2.28221	0.401946	-1.21334	2.35228	0.286974	NaN	NaN	NaN	NaN	NaN	NaN
-1.06947	2.26983	0.396708	-1.18292	2.39534	0.28756	NaN	NaN	NaN	NaN	NaN	NaN
-1.05292	2.28251	0.401251	-1.18087	2.36423	0.27936	NaN	NaN	NaN	NaN	NaN	NaN
-1.0449	2.26665	0.395316	-1.16252	2.39572	0.281222	NaN	NaN	NaN	NaN	NaN	NaN
-1.02917	2.27499	0.398592	-1.14805	2.41693	0.288914	NaN	NaN	NaN	NaN	NaN	NaN
-1.00608	2.27666	0.389426	-1.15414	2.32847	0.255277	NaN	NaN	NaN	NaN	NaN	NaN
-1.0008	2.27382	0.379338	-1.15356	2.27698	0.239002	NaN	NaN	NaN	NaN	NaN	NaN
-0.987879	2.28212	0.378517	-1.13785	2.27104	0.23793	NaN	NaN	NaN	NaN	NaN	NaN
-0.970906	2.28692	0.38066	-1.11963	2.30675	0.238673	NaN	NaN	NaN	NaN	NaN	NaN
-0.949832	2.29286	0.381342	-1.10406	2.30688	0.229176	NaN	NaN	NaN	NaN	NaN	NaN
-0.926554	2.29742	0.384064	-1.07672	2.33678	0.231211	NaN	NaN	NaN	NaN	NaN	NaN
-0.91403	2.28702	0.381067	-1.08075	2.2843	0.227006	NaN	NaN	NaN	NaN	NaN	NaN
-0.894461	2.32383	0.384701	-1.06283	2.29024	0.227673	NaN	NaN	NaN	NaN	NaN	NaN
-0.87003	2.36138	0.385192	-1.03547	2.31142	0.230167	NaN	NaN	NaN	NaN	NaN	NaN
-0.868732	2.32345	0.366703	-1.018	2.30955	0.229759	NaN	NaN	NaN	NaN	NaN	NaN
-0.860577	2.30137	0.362459	-1.01716	2.27471	0.218133	NaN	NaN	NaN	NaN	NaN	NaN
-0.84017	2.29798	0.361602	-0.978167	2.35224	0.211881	NaN	NaN	NaN	NaN	NaN	NaN
-0.823358	2.3159	0.363064	-0.961015	2.35279	0.204728	NaN	NaN	NaN	NaN	NaN	NaN
-0.817581	2.31453	0.362989	-0.955986	2.32415	0.205936	NaN	NaN	NaN	NaN	NaN	NaN
-0.806125	2.30138	0.363215	-0.942581	2.31324	0.21073	NaN	NaN	NaN	NaN	NaN	NaN
-0.780706	2.33161	0.364623	-0.914159	2.36101	0.22134	NaN	NaN	NaN	NaN	NaN	NaN
-0.753308	2.36659	0.366373	-0.902969	2.34504	0.206046	NaN	NaN	NaN	NaN	NaN	NaN
-0.718689	2.43949	0.369529	-0.883663	2.37287	0.208384	NaN	NaN	NaN	NaN	NaN	NaN
-0.715988	2.4336	0.36819	-0.864658	2.38264	0.210506	NaN	NaN	NaN	NaN	NaN	NaN
-0.70254	2.4144	0.367246	-0.85502	2.32919	0.191778	NaN	NaN	NaN	NaN	NaN	NaN
-0.690589	2.40955	0.359647	-0.848349	2.32493	0.182442	NaN	NaN	NaN	NaN	NaN	NaN
-0.677594	2.4248	0.364902	-0.847451	2.28742	0.170521	NaN	NaN	NaN	NaN	NaN	NaN
-0.653346	2.43478	0.369387	-0.848266	2.23665	0.158793	NaN	NaN	NaN	NaN	NaN	NaN
-0.649149	2.41782	0.359521	-0.836566	2.21302	0.150727	NaN	NaN	NaN	NaN	NaN	NaN
-0.645595	2.38075	0.349098	-0.81509	2.236	0.151034	NaN	NaN	NaN	NaN	NaN	NaN
-0.632805	2.38045	0.348758	-0.804855	2.22797	0.151543	NaN	NaN	NaN	NaN	NaN	NaN
-0.617699	2.3826	0.348802	-0.789927	2.2156	0.151756	NaN	NaN	NaN	NaN	NaN	NaN
-0.594995	2.41608	0.348737	-0.785669	2.21545	0.149813	NaN	NaN	NaN	NaN	NaN	NaN
-0.570797	2.44784	0.350401	-0.764179	2.24638	0.15355	NaN	NaN	NaN	NaN	NaN	NaN
-0.562554	2.3931	0.329946	-0.756824	2.22371	0.149783	NaN	NaN	NaN	NaN	NaN	NaN
-0.545154	2.42039	0.329319	-0.739208	2.22566	0.151545	NaN	NaN	NaN	NaN	NaN	NaN
-0.515014	2.45682	0.330795	-0.700915	2.28642	0.154023	NaN	NaN	NaN	NaN	NaN	NaN
-0.499905	2.46147	0.331815	-0.687145	2.33339	0.155178	NaN	NaN	NaN	NaN	NaN	NaN
-0.50597	2.39532	0.32063	-0.659495	2.38953	0.156932	NaN	NaN	NaN	NaN	NaN	NaN
-0.489065	2.39595	0.312732	-0.647952	2.37681	0.15589	NaN	NaN	NaN	NaN	NaN	NaN
-0.472271	2.40848	0.313882	-0.631016	2.37399	0.158429	NaN	NaN	NaN	NaN	NaN	NaN
-0.460377	2.39603	0.311065	-0.630325	2.35441	0.155402	NaN	NaN	NaN	NaN	NaN	NaN
-0.445391	2.39025	0.307061	-0.618095	2.34445	0.153541	NaN	NaN	NaN	NaN	NaN	NaN
-0.439028	2.36658	0.299098	-0.613781	2.34847	0.155181	NaN	NaN	NaN	NaN	NaN	NaN
-0.433097	2.33136	0.287919	-0.598285	2.35266	0.155799	NaN	NaN	NaN	NaN	NaN	NaN
-0.413203	2.3289	0.28494	-0.568793	2.40302	0.170393	NaN	NaN	NaN	NaN	NaN	NaN
-0.386066	2.36916	0.29208	-0.545405	2.43117	0.180171	NaN	NaN	NaN	NaN	NaN	NaN
-0.37577	2.35865	0.293025	-0.527013	2.45833	0.18137	NaN	NaN	NaN	NaN	NaN	NaN
-0.362933	2.3875	0.291922	-0.527144	2.4198	0.178655	NaN	NaN	NaN	NaN	NaN	NaN
-0.343126	2.41419	0.292086	-0.517175	2.41544	0.17219	NaN	NaN	NaN	NaN	NaN	NaN
-0.323064	2.44226	0.289946	-0.509285	2.39528	0.157078	NaN	NaN	NaN	NaN	NaN	NaN
-0.292403	2.5018	0.297916	-0.488454	2.42195	0.1583	NaN	NaN	NaN	NaN	NaN	NaN
-0.304088	2.44221	0.292204	-0.46775	2.43043	0.159858	NaN	NaN	NaN	NaN	NaN	NaN
-0.290304	2.44449	0.286545	-0.454523	2.42818	0.159709	NaN	NaN	NaN	NaN	NaN	NaN
-0.259884	2.49254	0.298585	-0.442819	2.43326	0.161119	NaN	NaN	NaN	NaN	NaN	NaN
-0.246277	2.48904	0.297961	-0.42837	2.46767	0.161483	NaN	NaN	NaN	NaN	NaN	NaN
-0.250325	2.41161	0.271114	-0.412503	2.49711	0.161144	NaN	NaN	NaN	NaN	NaN	NaN
-0.232178	2.41292	0.269645	-0.402584	2.4895	0.16069	NaN	NaN	NaN	NaN	NaN	NaN
-0.216239	2.41453	0.273133	-0.392522	2.49763	0.163323	NaN	NaN	NaN	NaN	NaN	NaN
-0.208941	2.42336	0.275736	-0.378259	2.49937	0.160933	NaN	NaN	NaN	NaN	NaN	NaN
-0.193211	2.45154	0.27801	-0.361168	2.5139	0.164459	NaN	NaN	NaN	NaN	NaN	NaN
-0.177545	2.45743	0.278833	-0.360899	2.46668	0.150734	NaN	NaN	NaN	NaN	NaN	NaN
-0.157214	2.45345	0.280789	-0.334157	2.49932	0.148162	NaN	NaN	NaN	NaN	NaN	NaN
-0.161295	2.42849	0.276914	-0.318698	2.4998	0.143722	NaN	NaN	NaN	NaN	NaN	NaN
-0.152326	2.4223	0.27271	-0.299635	2.5005	0.141335	NaN	NaN	NaN	NaN	NaN	NaN
-0.136289	2.42918	0.27552	-0.29278	2.50234	0.143153	NaN	NaN	NaN	NaN	NaN	NaN
-0.114838	2.43351	0.26653	-0.273702	2.51984	0.147464	NaN	NaN	NaN	NaN	NaN	NaN
-0.095245	2.44067	0.259669	-0.254112	2.52269	0.146729	NaN	NaN	NaN	NaN	NaN	NaN
-0.079643	2.44109	0.258698	-0.249558	2.48798	0.135947	NaN	NaN	NaN	NaN	NaN	NaN
-0.057512	2.48376	0.271303	-0.227361	2.51119	0.143723	NaN	NaN	NaN	NaN	NaN	NaN
-0.038576	2.50941	0.283562	-0.217378	2.50897	0.144495	NaN	NaN	NaN	NaN	NaN	NaN
-0.032234	2.49399	0.27646	-0.207786	2.50741	0.143121	NaN	NaN	NaN	NaN	NaN	NaN
-0.036095	2.48388	0.271249	-0.190308	2.51965	0.144957	NaN	NaN	NaN	NaN	NaN	NaN
-0.019205	2.49562	0.275135	-0.168529	2.51852	0.143608	NaN	NaN	NaN	NaN	NaN	NaN
0.009838	2.53383	0.278655	-0.14441	2.54599	0.145381	NaN	NaN	NaN	NaN	NaN	NaN
0.037213	2.5604	0.278114	-0.134349	2.53572	0.147752	NaN	NaN	NaN	NaN	NaN	NaN
0.052455	2.57215	0.282219	-0.124259	2.51746	0.1434	NaN	NaN	NaN	NaN	NaN	NaN
0.062372	2.58013	0.283466	-0.106693	2.53478	0.150452	NaN	NaN	NaN	NaN	NaN	NaN
0.078148	2.57609	0.281202	-0.115961	2.45093	0.123463	NaN	NaN	NaN	NaN	NaN	NaN
0.084604	2.52354	0.272122	-0.093447	2.4828	0.122286	NaN	NaN	NaN	NaN	NaN	NaN
0.098339	2.57321	0.283347	-0.057129	2.54755	0.128644	NaN	NaN	NaN	NaN	NaN	NaN
0.110171	2.57786	0.281714	-0.035664	2.5532	0.131062	NaN	NaN	NaN	NaN	NaN	NaN
0.124952	2.57805	0.282472	-0.020722	2.53484	0.127902	NaN	NaN	NaN	NaN	NaN	NaN
0.132892	2.55148	0.273024	-0.02021	2.53444	0.119728	NaN	NaN	NaN	NaN	NaN	NaN
0.149894	2.58548	0.284244	-0.011535	2.53677	0.118134	NaN	NaN	NaN	NaN	NaN	NaN
0.167231	2.58154	0.284177	-0.005989	2.53078	0.106729	NaN	NaN	NaN	NaN	NaN	NaN
0.185156	2.58717	0.283808	0.000719	2.4989	0.09417	NaN	NaN	NaN	NaN	NaN	NaN
0.180892	2.54932	0.27307	0.01004	2.47435	0.087098	NaN	NaN	NaN	NaN	NaN	NaN
0.201893	2.5708	0.279878	0.024951	2.47801	0.088897	NaN	NaN	NaN	NaN	NaN	NaN
0.219465	2.57487	0.280219	0.03721	2.47675	0.087279	NaN	NaN	NaN	NaN	NaN	NaN
0.234688	2.58856	0.285713	0.067793	2.52067	0.10121	NaN	NaN	NaN	NaN	NaN	NaN
0.227502	2.53086	0.263359	0.091056	2.55026	0.110932	NaN	NaN	NaN	NaN	NaN	NaN
0.239933	2.53184	0.264154	0.104927	2.54589	0.112658	NaN	NaN	NaN	NaN	NaN	NaN
0.262915	2.56407	0.263921	0.120061	2.58724	0.112116	NaN	NaN	NaN	NaN	NaN	NaN
0.287911	2.59571	0.266035	0.138246	2.62215	0.115238	NaN	NaN	NaN	NaN	NaN	NaN
0.306912	2.60323	0.267019	0.147114	2.61664	0.114699	NaN	NaN	NaN	NaN	NaN	NaN
0.309368	2.57476	0.256641	0.161881	2.61851	0.114239	NaN	NaN	NaN	NaN	NaN	NaN
0.315906	2.58196	0.260486	0.181544	2.621	0.115027	NaN	NaN	NaN	NaN	NaN	NaN
0.332744	2.59441	0.265324	0.184923	2.6156	0.113899	NaN	NaN	NaN	NaN	NaN	NaN
0.349814	2.59477	0.26509	0.194064	2.60735	0.110684	NaN	NaN	NaN	NaN	NaN	NaN
0.375887	2.61375	0.267224	0.214152	2.61535	0.111074	NaN	NaN	NaN	NaN	NaN	NaN
0.376503	2.56642	0.254923	0.224784	2.61871	0.113854	NaN	NaN	NaN	NaN	NaN	NaN
0.376995	2.57144	0.258108	0.225604	2.58905	0.103543	NaN	NaN	NaN	NaN	NaN	NaN
0.391138	2.60543	0.265662	0.229971	2.58754	0.10304	NaN	NaN	NaN	NaN	NaN	NaN
0.411916	2.60091	0.264363	0.23271	2.57119	0.095275	NaN	NaN	NaN	NaN	NaN	NaN
0.433763	2.62371	0.269425	0.253985	2.59381	0.102671	NaN	NaN	NaN	NaN	NaN	NaN
0.444179	2.60854	0.267959	0.262631	2.57348	0.099332	NaN	NaN	NaN	NaN	NaN	NaN
0.445112	2.59019	0.25788	0.270233	2.56252	0.09273	NaN	NaN	NaN	NaN	NaN	NaN
0.455141	2.59577	0.262156	0.289532	2.57559	0.094562	NaN	NaN	NaN	NaN	NaN	NaN
0.478916	2.64323	0.267413	0.301969	2.56381	0.094555	NaN	NaN	NaN	NaN	NaN	NaN
0.501397	2.67593	0.267053	0.315053	2.56908	0.094539	NaN	NaN	NaN	NaN	NaN	NaN
0.506178	2.61988	0.249371	0.335808	2.63255	0.097066	NaN	NaN	NaN	NaN	NaN	NaN
0.519382	2.64584	0.249662	0.349211	2.60868	0.093017	NaN	NaN	NaN	NaN	NaN	NaN
0.520518	2.6105	0.245152	0.369149	2.62805	0.094296	NaN	NaN	NaN	NaN	NaN	NaN
0.527839	2.62407	0.250158	0.382113	2.6457	0.099216	NaN	NaN	NaN	NaN	NaN	NaN
0.543139	2.66299	0.250451	0.385186	2.63003	0.093548	NaN	NaN	NaN	NaN	NaN	NaN
0.558685	2.65397	0.239118	0.396935	2.63705	0.096079	NaN	NaN	NaN	NaN	NaN	NaN
0.571654	2.65236	0.232113	0.406754	2.62897	0.093205	NaN	NaN	NaN	NaN	NaN	NaN
0.583132	2.62263	0.229161	0.422549	2.6412	0.097382	NaN	NaN	NaN	NaN	NaN	NaN
0.600675	2.63222	0.233549	0.431415	2.6397	0.097362	NaN	NaN	NaN	NaN	NaN	NaN
0.617838	2.63793	0.232608	0.449127	2.64071	0.097552	NaN	NaN	NaN	NaN	NaN	NaN
0.61725	2.62534	0.231481	0.451104	2.63331	0.096846	NaN	NaN	NaN	NaN	NaN	NaN
0.630074	2.62464	0.226936	0.472651	2.65125	0.098676	NaN	NaN	NaN	NaN	NaN	NaN
0.63743	2.62763	0.230878	0.488597	2.64918	0.100105	NaN	NaN	NaN	NaN	NaN	NaN
0.656631	2.66234	0.238214	0.489227	2.6452	0.098922	NaN	NaN	NaN	NaN	NaN	NaN
0.659633	2.63393	0.233307	0.497451	2.64648	0.095838	NaN	NaN	NaN	NaN	NaN	NaN
0.686795	2.6663	0.232256	0.506813	2.64762	0.095765	NaN	NaN	NaN	NaN	NaN	NaN
0.71148	2.69564	0.233839	0.515663	2.63602	0.09469	NaN	NaN	NaN	NaN	NaN	NaN
0.720152	2.69193	0.234262	0.528384	2.65054	0.097536	NaN	NaN	NaN	NaN	NaN	NaN
0.732512	2.68862	0.229163	0.545807	2.67781	0.098222	NaN	NaN	NaN	NaN	NaN	NaN
0.742483	2.67931	0.236649	0.561865	2.68995	0.099804	NaN	NaN	NaN	NaN	NaN	NaN
0.746433	2.63409	0.232348	0.577229	2.71112	0.100707	NaN	NaN	NaN	NaN	NaN	NaN
0.764106	2.6549	0.234196	0.588397	2.71589	0.098447	NaN	NaN	NaN	NaN	NaN	NaN
0.773216	2.63341	0.231693	0.595485	2.7133	0.101024	NaN	NaN	NaN	NaN	NaN	NaN
0.795947	2.64486	0.231818	0.600529	2.68558	0.096967	NaN	NaN	NaN	NaN	NaN	NaN
0.806901	2.67647	0.235939	0.622903	2.74418	0.105242	NaN	NaN	NaN	NaN	NaN	NaN
0.804587	2.63019	0.22876	0.624016	2.6932	0.087833	NaN	NaN	NaN	NaN	NaN	NaN
0.829695	2.69017	0.234624	0.636922	2.66453	0.082405	NaN	NaN	NaN	NaN	NaN	NaN
0.836718	2.6887	0.227991	0.65072	2.6649	0.082273	NaN	NaN	NaN	NaN	NaN	NaN
0.857368	2.72066	0.235815	0.6815	2.70005	0.083322	NaN	NaN	NaN	NaN	NaN	NaN
0.858089	2.69178	0.230273	0.687998	2.72487	0.082803	NaN	NaN	NaN	NaN	NaN	NaN
0.87573	2.71507	0.235294	0.698253	2.72184	0.081261	NaN	NaN	NaN	NaN	NaN	NaN
0.884814	2.70348	0.229935	0.711493	2.73262	0.083535	NaN	NaN	NaN	NaN	NaN	NaN
0.895697	2.71196	0.236547	0.719346	2.7234	0.080192	NaN	NaN	NaN	NaN	NaN	NaN
0.905684	2.70187	0.230498	0.732365	2.73104	0.08409	NaN	NaN	NaN	NaN	NaN	NaN
0.928105	2.74237	0.239362	0.750075	2.73581	0.082131	NaN	NaN	NaN	NaN	NaN	NaN
0.920764	2.69162	0.229531	0.76926	2.73115	0.082806	NaN	NaN	NaN	NaN	NaN	NaN
0.932063	2.6979	0.228255	0.789044	2.73516	0.084882	NaN	NaN	NaN	NaN	NaN	NaN
0.952328	2.72257	0.235161	0.803376	2.73324	0.083664	NaN	NaN	NaN	NaN	NaN	NaN
0.961077	2.70285	0.229645	0.808438	2.73276	0.084317	NaN	NaN	NaN	NaN	NaN	NaN
0.984651	2.72428	0.238915	0.824481	2.74372	0.08565	NaN	NaN	NaN	NaN	NaN	NaN
0.982572	2.70962	0.233667	0.833118	2.72649	0.081871	NaN	NaN	NaN	NaN	NaN	NaN
0.996242	2.72893	0.236272	0.849129	2.75174	0.086489	NaN	NaN	NaN	NaN	NaN	NaN
1.00771	2.72777	0.227007	0.857744	2.74403	0.085985	NaN	NaN	NaN	NaN	NaN	NaN
1.02789	2.76775	0.233221	0.874703	2.74143	0.085228	NaN	NaN	NaN	NaN	NaN	NaN
1.04548	2.79205	0.23939	0.902292	2.77643	0.085472	NaN	NaN	NaN	NaN	NaN	NaN
1.05743	2.78067	0.234986	0.925369	2.8122	0.088441	NaN	NaN	NaN	NaN	NaN	NaN
1.05904	2.72505	0.216431	0.925001	2.81165	0.086271	NaN	NaN	NaN	NaN	NaN	NaN
1.0743	2.74362	0.215878	0.929439	2.79887	0.083591	NaN	NaN	NaN	NaN	NaN	NaN
1.08025	2.73351	0.218144	0.935959	2.80653	0.085556	NaN	NaN	NaN	NaN	NaN	NaN
1.10862	2.76025	0.2249	0.941507	2.79867	0.081531	NaN	NaN	NaN	NaN	NaN	NaN
1.11761	2.75306	0.228037	0.948439	2.80087	0.083668	NaN	NaN	NaN	NaN	NaN	NaN
1.13903	2.80657	0.24277	0.969331	2.81926	0.088789	NaN	NaN	NaN	NaN	NaN	NaN
1.1643	2.8394	0.233832	0.970182	2.80337	0.083556	NaN	NaN	NaN	NaN	NaN	NaN
1.1765	2.84391	0.236251	0.989605	2.8235	0.089659	NaN	NaN	NaN	NaN	NaN	NaN
1.19804	2.8694	0.245238	0.992031	2.8065	0.087133	NaN	NaN	NaN	NaN	NaN	NaN
1.19791	2.82503	0.229943	1.01298	2.82439	0.090466	NaN	NaN	NaN	NaN	NaN	NaN
1.18752	2.78135	0.215486	1.02809	2.85481	0.091421	NaN	NaN	NaN	NaN	NaN	NaN
1.20463	2.80974	0.221126	1.05657	2.89833	0.096156	NaN	NaN	NaN	NaN	NaN	NaN
1.20921	2.80515	0.221627	1.07805	2.92701	0.094641	NaN	NaN	NaN	NaN	NaN	NaN
1.22482	2.79632	0.217031	1.08146	2.88842	0.083274	NaN	NaN	NaN	NaN	NaN	NaN
1.23872	2.80006	0.221308	1.1034	2.90759	0.089383	NaN	NaN	NaN	NaN	NaN	NaN
1.25733	2.82045	0.226361	1.10834	2.88755	0.09088	NaN	NaN	NaN	NaN	NaN	NaN
1.26696	2.81721	0.226848	1.11675	2.88473	0.09229	NaN	NaN	NaN	NaN	NaN	NaN
1.26477	2.79133	0.216206	1.12593	2.87362	0.086089	NaN	NaN	NaN	NaN	NaN	NaN
1.27719	2.81457	0.222274	1.1254	2.85135	0.080545	NaN	NaN	NaN	NaN	NaN	NaN
1.28793	2.82995	0.219712	1.13925	2.87247	0.085971	NaN	NaN	NaN	NaN	NaN	NaN
1.29617	2.81939	0.221761	1.15096	2.87449	0.087083	NaN	NaN	NaN	NaN	NaN	NaN
1.30614	2.78962	0.21649	1.15715	2.84502	0.076808	NaN	NaN	NaN	NaN	NaN	NaN
1.32647	2.81721	0.22387	1.16511	2.8388	0.073365	NaN	NaN	NaN	NaN	NaN	NaN
1.34322	2.81874	0.224263	1.16863	2.82818	0.069637	NaN	NaN	NaN	NaN	NaN	NaN
1.35672	2.81854	0.224322	1.18377	2.84307	0.072557	NaN	NaN	NaN	NaN	NaN	NaN
1.3605	2.78388	0.21206	1.19714	2.83164	0.069827	NaN	NaN	NaN	NaN	NaN	NaN
1.39066	2.85916	0.224598	1.22184	2.84423	0.073851	NaN	NaN	NaN	NaN	NaN	NaN
1.39997	2.8655	0.2202	1.23044	2.83358	0.07175	NaN	NaN	NaN	NaN	NaN	NaN
1.41794	2.8715	0.222118	1.2487	2.83938	0.071343	NaN	NaN	NaN	NaN	NaN	NaN
1.42945	2.86764	0.220444	1.25651	2.83918	0.071028	NaN	NaN	NaN	NaN	NaN	NaN
1.44627	2.88191	0.224718	1.26167	2.8411	0.071018	NaN	NaN	NaN	NaN	NaN	NaN
1.4408	2.87504	0.223168	1.26751	2.82955	0.067821	NaN	NaN	NaN	NaN	NaN	NaN
1.45408	2.89185	0.224142	1.28425	2.86656	0.071239	NaN	NaN	NaN	NaN	NaN	NaN
1.47129	2.92009	0.223479	1.30409	2.88829	0.069424	NaN	NaN	NaN	NaN	NaN	NaN
1.4911	2.95007	0.224684	1.32171	2.91226	0.076151	NaN	NaN	NaN	NaN	NaN	NaN
1.50417	2.95816	0.229295	1.33486	2.89669	0.071548	NaN	NaN	NaN	NaN	NaN	NaN
1.50665	2.9253	0.220801	1.33918	2.90169	0.074296	NaN	NaN	NaN	NaN	NaN	NaN
1.51412	2.93807	0.228307	1.35425	2.91502	0.074349	NaN	NaN	NaN	NaN	NaN	NaN
1.52954	2.95107	0.226602	1.3604	2.90593	0.077555	NaN	NaN	NaN	NaN	NaN	NaN
1.53405	2.92253	0.216694	1.37063	2.91133	0.073797	NaN	NaN	NaN	NaN	NaN	NaN
1.55413	2.96246	0.227587	1.38602	2.91484	0.075434	NaN	NaN	NaN	NaN	NaN	NaN
1.55819	2.94202	0.224278	1.40063	2.91505	0.078753	NaN	NaN	NaN	NaN	NaN	NaN
1.57443	2.96189	0.22858	1.40767	2.91431	0.075549	NaN	NaN	NaN	NaN	NaN	NaN
1.5936	2.98541	0.226432	1.42182	2.91097	0.073339	NaN	NaN	NaN	NaN	NaN	NaN
1.61608	3.03094	0.230179	1.44349	2.95052	0.076622	NaN	NaN	NaN	NaN	NaN	NaN
1.62077	3.01357	0.228466	1.45203	2.96232	0.074008	NaN	NaN	NaN	NaN	NaN	NaN
1.63556	3.03005	0.232472	1.45117	2.95064	0.077056	NaN	NaN	NaN	NaN	NaN	NaN
1.62843	2.98359	0.216639	1.46295	2.97046	0.074071	NaN	NaN	NaN	NaN	NaN	NaN
1.64133	2.96858	0.21083	1.48211	2.98265	0.077863	NaN	NaN	NaN	NaN	NaN	NaN
1.64847	2.9656	0.211722	1.49363	2.96948	0.07581	NaN	NaN	NaN	NaN	NaN	NaN
1.65795	2.94204	0.210363	1.50299	2.97985	0.079075	NaN	NaN	NaN	NaN	NaN	NaN
1.66761	2.93563	0.203315	1.50912	2.96331	0.073577	NaN	NaN	NaN	NaN	NaN	NaN
1.68426	2.9608	0.207351	1.51706	2.96675	0.071351	NaN	NaN	NaN	NaN	NaN	NaN
1.68467	2.95999	0.208474	1.52796	2.95384	0.076641	NaN	NaN	NaN	NaN	NaN	NaN
1.70094	2.96623	0.206021	1.5361	2.97692	0.077529	NaN	NaN	NaN	NaN	NaN	NaN
1.70974	2.96958	0.211078	1.55143	2.9621	0.069416	NaN	NaN	NaN	NaN	NaN	NaN
1.72056	2.96695	0.206506	1.56693	2.97471	0.076141	NaN	NaN	NaN	NaN	NaN	NaN
1.73215	2.93998	0.201842	1.58059	2.97827	0.077745	NaN	NaN	NaN	NaN	NaN	NaN
1.7439	2.94442	0.200354	1.59382	2.99635	0.08016	NaN	NaN	NaN	NaN	NaN	NaN
1.75737	2.97079	0.211153	1.58434	2.9504	0.067267	NaN	NaN	NaN	NaN	NaN	NaN
1.76839	2.9759	0.209489	1.58917	2.93488	0.057244	NaN	NaN	NaN	NaN	NaN	NaN
1.78119	2.97275	0.202436	1.60015	2.92574	0.056171	NaN	NaN	NaN	NaN	NaN	NaN
1.78912	2.96661	0.207115	1.61469	2.91862	0.055557	NaN	NaN	NaN	NaN	NaN	NaN
1.8069	2.99201	0.212955	1.62896	2.92811	0.058901	NaN	NaN	NaN	NaN	NaN	NaN
1.80333	2.96986	0.196131	1.63584	2.9146	0.054084	NaN	NaN	NaN	NaN	NaN	NaN
1.81529	2.97853	0.189025	1.64821	2.93005	0.059266	NaN	NaN	NaN	NaN	NaN	NaN
1.83392	2.98521	0.193873	1.65055	2.9337	0.055861	NaN	NaN	NaN	NaN	NaN	NaN
1.84346	2.97885	0.191225	1.65802	2.95318	0.059219	NaN	NaN	NaN	NaN	NaN	NaN
1.85249	2.98934	0.189982	1.66511	2.95726	0.059133	NaN	NaN	NaN	NaN	NaN	NaN
1.85696	2.95569	0.182578	1.67058	2.9423	0.058017	NaN	NaN	NaN	NaN	NaN	NaN
1.87103	2.97399	0.187776	1.69586	2.96374	0.05804	NaN	NaN	NaN	NaN	NaN	NaN
1.88346	2.99072	0.193567	1.71307	3.00624	0.06327	NaN	NaN	NaN	NaN	NaN	NaN
1.89236	2.98461	0.189974	1.72375	3.00182	0.060514	NaN	NaN	NaN	NaN	NaN	NaN
1.90175	2.98557	0.194016	1.73429	3.001	0.061549	NaN	NaN	NaN	NaN	NaN	NaN
1.9043	2.9505	0.178629	1.74063	2.98316	0.056183	NaN	NaN	NaN	NaN	NaN	NaN
1.90831	2.93219	0.17405	1.7521	2.99165	0.05449	NaN	NaN	NaN	NaN	NaN	NaN
1.92987	2.95651	0.171014	1.74729	2.95137	0.054784	NaN	NaN	NaN	NaN	NaN	NaN
1.95196	2.9983	0.177344	1.75443	2.95488	0.063119	NaN	NaN	NaN	NaN	NaN	NaN
1.95594	2.97675	0.168298	1.75565	2.93541	0.055698	NaN	NaN	NaN	NaN	NaN	NaN
1.96946	2.99244	0.174949	1.78548	3.00516	0.062464	NaN	NaN	NaN	NaN	NaN	NaN
1.97694	2.99509	0.17078	1.80013	3.00027	0.05943	NaN	NaN	NaN	NaN	NaN	NaN
1.98988	3.00277	0.178254	1.81614	3.00708	0.063427	NaN	NaN	NaN	NaN	NaN	NaN
2.00604	3.02513	0.178855	1.81613	2.96315	0.046237	NaN	NaN	NaN	NaN	NaN	NaN
2.01577	2.99679	0.173638	1.82357	2.95869	0.044977	NaN	NaN	NaN	NaN	NaN	NaN
2.02482	2.99533	0.173827	1.83108	2.94019	0.037122	NaN	NaN	NaN	NaN	NaN	NaN
2.03407	2.9953	0.171427	1.83985	2.94392	0.038611	NaN	NaN	NaN	NaN	NaN	NaN
2.04796	3.03233	0.1769	1.85522	2.95303	0.040198	NaN	NaN	NaN	NaN	NaN	NaN
2.04567	3.00172	0.17262	1.86096	2.95036	0.04219	NaN	NaN	NaN	NaN	NaN	NaN
2.06976	3.04395	0.178183	1.87945	2.98372	0.040654	NaN	NaN	NaN	NaN	NaN	NaN
2.07887	3.04875	0.173548	1.8909	3.00865	0.042493	NaN	NaN	NaN	NaN	NaN	NaN
2.09524	3.08137	0.179709	1.90336	3.01593	0.039857	NaN	NaN	NaN	NaN	NaN	NaN
2.10219	3.06966	0.179499	1.90693	3.0009	0.047875	NaN	NaN	NaN	NaN	NaN	NaN
2.11408	3.07283	0.178166	1.92152	3.00535	0.038745	NaN	NaN	NaN	NaN	NaN	NaN
2.11364	3.03188	0.165027	1.9323	3.01781	0.044737	NaN	NaN	NaN	NaN	NaN	NaN
2.11711	3.02755	0.159348	1.94138	3.02222	0.04088	NaN	NaN	NaN	NaN	NaN	NaN
2.12075	2.99748	0.151816	1.95052	3.02012	0.045318	NaN	NaN	NaN	NaN	NaN	NaN
2.14233	3.04006	0.159327	1.96082	3.01857	0.04118	NaN	NaN	NaN	NaN	NaN	NaN
2.14194	3.00046	0.152737	1.9706	3.02278	0.045714	NaN	NaN	NaN	NaN	NaN	NaN
2.16038	3.03488	0.161051	1.98857	3.07277	0.046194	NaN	NaN	NaN	NaN	NaN	NaN
2.16035	2.99584	0.152667	2.00035	3.07579	0.047695	NaN	NaN	NaN	NaN	NaN	NaN
2.17671	3.02136	0.157618	2.01247	3.08638	0.044087	NaN	NaN	NaN	NaN	NaN	NaN
2.18224	3.00605	0.154656	2.01265	3.00153	0.026685	NaN	NaN	NaN	NaN	NaN	NaN
2.20939	3.06593	0.160552	2.01257	2.96064	0.021415	NaN	NaN	NaN	NaN	NaN	NaN
2.22488	3.06892	0.157881	2.02589	2.96758	0.021379	NaN	NaN	NaN	NaN	NaN	NaN
2.23454	3.07882	0.160353	2.03883	2.9955	0.024867	NaN	NaN	NaN	NaN	NaN	NaN
2.24741	3.06887	0.156731	2.04689	2.97648	0.022437	NaN	NaN	NaN	NaN	NaN	NaN
2.26873	3.1014	0.165041	2.05954	3.00724	0.028636	NaN	NaN	NaN	NaN	NaN	NaN
2.2734	3.05481	0.152917	2.06409	2.97641	0.023068	NaN	NaN	NaN	NaN	NaN	NaN
2.27544	3.06429	0.150083	2.07138	2.96124	0.021699	NaN	NaN	NaN	NaN	NaN	NaN
2.27993	3.03174	0.142092	2.08986	3.00535	0.02365	NaN	NaN	NaN	NaN	NaN	NaN
2.28469	3.04911	0.146059	2.10289	3.03065	0.02721	NaN	NaN	NaN	NaN	NaN	NaN
2.28565	3.01166	0.136982	2.11429	3.04133	0.025125	NaN	NaN	NaN	NaN	NaN	NaN
2.30969	3.03914	0.140389	2.12143	3.03702	0.027757	NaN	NaN	NaN	NaN	NaN	NaN
2.32388	3.03198	0.141428	2.13337	3.04192	0.025623	NaN	NaN	NaN	NaN	NaN	NaN
2.33876	3.0325	0.1416	2.14078	3.03498	0.026259	NaN	NaN	NaN	NaN	NaN	NaN
2.35149	3.02738	0.140795	2.15933	3.04427	0.017362	NaN	NaN	NaN	NaN	NaN	NaN
2.36469	3.0404	0.141723	2.17172	3.04697	0.00998	NaN	NaN	NaN	NaN	NaN	NaN
2.37093	3.03183	0.141261	2.18135	3.04078	0.007546	NaN	NaN	NaN	NaN	NaN	NaN
2.38737	3.087	0.138658	2.18968	3.04777	0.009355	NaN	NaN	NaN	NaN	NaN	NaN
2.39385	3.08438	0.139935	2.21061	3.06934	0.015095	NaN	NaN	NaN	NaN	NaN	NaN
2.41062	3.1077	0.144464	2.22052	3.05994	0.012793	NaN	NaN	NaN	NaN	NaN	NaN
2.42015	3.12068	0.140722	2.23776	3.05993	0.009699	NaN	NaN	NaN	NaN	NaN	NaN
2.44205	3.17047	0.148167	2.245	3.05624	0.010768	NaN	NaN	NaN	NaN	NaN	NaN
2.4453	3.15027	0.141643	2.24716	3.06634	0.0082	NaN	NaN	NaN	NaN	NaN	NaN
2.45654	3.14195	0.146738	2.26042	3.06654	0.011743	NaN	NaN	NaN	NaN	NaN	NaN
2.46181	3.13117	0.133132	2.26481	3.04689	0.007597	NaN	NaN	NaN	NaN	NaN	NaN
2.46875	3.10857	0.122739	2.27345	3.06445	0.011412	NaN	NaN	NaN	NaN	NaN	NaN
2.47765	3.10577	0.123976	2.28376	3.08963	0.008696	NaN	NaN	NaN	NaN	NaN	NaN
2.49142	3.10815	0.120098	2.29661	3.13447	0.013222	NaN	NaN	NaN	NaN	NaN	NaN
2.50891	3.11771	0.126233	2.30443	3.14478	0.012224	NaN	NaN	NaN	NaN	NaN	NaN
2.5289	3.14522	0.127489	2.31646	3.13758	0.012111	NaN	NaN	NaN	NaN	NaN	NaN
2.5445	3.17489	0.128536	2.32179	3.11058	0.011181	NaN	NaN	NaN	NaN	NaN	NaN
2.55534	3.18503	0.129184	2.3356	3.13068	0.014895	NaN	NaN	NaN	NaN	NaN	NaN
2.5607	3.16723	0.125681	2.35154	3.11486	0.011714	NaN	NaN	NaN	NaN	NaN	NaN
2.57443	3.18082	0.129086	2.36897	3.14677	0.012692	NaN	NaN	NaN	NaN	NaN	NaN
2.57988	3.17033	0.126277	2.38754	3.16137	0.014319	NaN	NaN	NaN	NaN	NaN	NaN
2.59954	3.21808	0.129572	2.40718	3.18942	0.014769	NaN	NaN	NaN	NaN	NaN	NaN
2.61082	3.23361	0.1302	2.41455	3.1809	0.015006	NaN	NaN	NaN	NaN	NaN	NaN
2.62422	3.24824	0.12997	2.42453	3.18768	0.016279	NaN	NaN	NaN	NaN	NaN	NaN
2.61049	3.14792	0.109072	2.43371	3.18748	0.014317	NaN	NaN	NaN	NaN	NaN	NaN
2.61215	3.11746	0.103548	2.44351	3.19992	0.017295	NaN	NaN	NaN	NaN	NaN	NaN
2.62215	3.13177	0.102377	2.44654	3.17971	0.012936	NaN	NaN	NaN	NaN	NaN	NaN
2.62451	3.11482	0.104467	2.46107	3.20729	0.017711	NaN	NaN	NaN	NaN	NaN	NaN
2.63185	3.12417	0.102783	2.47025	3.18872	0.014009	NaN	NaN	NaN	NaN	NaN	NaN
2.64254	3.11779	0.104096	2.47747	3.2171	0.01726	NaN	NaN	NaN	NaN	NaN	NaN
2.65491	3.12741	0.106426	2.47148	3.18855	0.011913	NaN	NaN	NaN	NaN	NaN	NaN
2.68518	3.20807	0.107222	2.48122	3.21996	0.014009	NaN	NaN	NaN	NaN	NaN	NaN
2.71037	3.26528	0.114359	2.50718	3.23451	0.009261	NaN	NaN	NaN	NaN	NaN	NaN
2.72365	3.25623	0.114124	2.525	3.29013	0.020574	NaN	NaN	NaN	NaN	NaN	NaN
2.73876	3.26308	0.11454	2.54112	3.30161	0.02101	NaN	NaN	NaN	NaN	NaN	NaN
2.74156	3.25187	0.113848	2.55991	3.32572	0.021671	NaN	NaN	NaN	NaN	NaN	NaN
2.74478	3.22946	0.101426	2.55837	3.29851	0.013758	NaN	NaN	NaN	NaN	NaN	NaN
2.7491	3.19457	0.092981	2.57424	3.32024	0.019363	NaN	NaN	NaN	NaN	NaN	NaN
2.759	3.20057	0.092335	2.58387	3.32542	0.024471	NaN	NaN	NaN	NaN	NaN	NaN
2.76822	3.22278	0.091927	2.5805	3.26364	-0.00285	NaN	NaN	NaN	NaN	NaN	NaN
2.79017	3.28355	0.098189	2.59968	3.26663	0.001838	NaN	NaN	NaN	NaN	NaN	NaN
2.78993	3.249	0.090839	2.61163	3.26043	-0.001571	NaN	NaN	NaN	NaN	NaN	NaN
2.79993	3.24768	0.0957	2.6225	3.26939	0.002023	NaN	NaN	NaN	NaN	NaN	NaN
2.80805	3.24722	0.090663	2.63184	3.26123	-0.001072	NaN	NaN	NaN	NaN	NaN	NaN
2.81698	3.27271	0.093176	2.65084	3.32447	0.0047	NaN	NaN	NaN	NaN	NaN	NaN
2.813	3.22144	0.089567	2.65984	3.3169	-0.000187	NaN	NaN	NaN	NaN	NaN	NaN
2.84059	3.2643	0.092453	2.65828	3.25679	-0.026787	NaN	NaN	NaN	NaN	NaN	NaN
2.85578	3.27071	0.096585	2.65673	3.20508	-0.042633	NaN	NaN	NaN	NaN	NaN	NaN
2.87263	3.282	0.097924	2.66936	3.21718	-0.039524	NaN	NaN	NaN	NaN	NaN	NaN
2.8735	3.23575	0.085655	2.68083	3.22764	-0.037318	NaN	NaN	NaN	NaN	NaN	NaN
2.89105	3.278	0.096898	2.68776	3.21124	-0.039479	NaN	NaN	NaN	NaN	NaN	NaN
2.8938	3.25446	0.091878	2.69923	3.22521	-0.037161	NaN	NaN	NaN	NaN	NaN	NaN
2.90566	3.25657	0.07963	2.71182	3.24863	-0.0364	NaN	NaN	NaN	NaN	NaN	NaN
2.91741	3.27366	0.077884	2.72126	3.24431	-0.032675	NaN	NaN	NaN	NaN	NaN	NaN
2.92519	3.25978	0.072462	2.72763	3.22666	-0.043636	NaN	NaN	NaN	NaN	NaN	NaN
2.94584	3.27237	0.074747	2.7405	3.25298	-0.034776	NaN	NaN	NaN	NaN	NaN	NaN
2.94949	3.27301	0.078158	2.74263	3.21232	-0.040109	NaN	NaN	NaN	NaN	NaN	NaN
2.95907	3.28062	0.074626	2.76238	3.26849	-0.033993	NaN	NaN	NaN	NaN	NaN	NaN
2.96838	3.27875	0.0783	2.78356	3.30728	-0.036131	NaN	NaN	NaN	NaN	NaN	NaN
2.98405	3.29471	0.075294	2.79059	3.29703	-0.032486	NaN	NaN	NaN	NaN	NaN	NaN
2.99743	3.2514	0.068012	2.8098	3.32678	-0.034233	NaN	NaN	NaN	NaN	NaN	NaN
3.00229	3.27913	0.078146	2.82592	3.36242	-0.030937	NaN	NaN	NaN	NaN	NaN	NaN
3.00515	3.27645	0.07382	2.82483	3.29661	-0.052459	NaN	NaN	NaN	NaN	NaN	NaN
3.01465	3.29609	0.079736	2.83433	3.29867	-0.053141	NaN	NaN	NaN	NaN	NaN	NaN
3.02191	3.28563	0.066711	2.84086	3.26827	-0.061586	NaN	NaN	NaN	NaN	NaN	NaN
3.03362	3.29882	0.061579	2.85461	3.28926	-0.05372	NaN	NaN	NaN	NaN	NaN	NaN
3.03705	3.27554	0.055805	2.86746	3.30386	-0.053158	NaN	NaN	NaN	NaN	NaN	NaN
3.05469	3.30828	0.063729	2.87833	3.31686	-0.056066	NaN	NaN	NaN	NaN	NaN	NaN
3.05672	3.27704	0.046864	2.89473	3.3527	-0.054574	NaN	NaN	NaN	NaN	NaN	NaN
3.06213	3.24692	0.043407	2.91081	3.36486	-0.045295	NaN	NaN	NaN	NaN	NaN	NaN
3.07504	3.27435	0.035711	2.91806	3.34856	-0.052286	NaN	NaN	NaN	NaN	NaN	NaN
3.10384	3.34313	0.045903	2.9334	3.37951	-0.046032	NaN	NaN	NaN	NaN	NaN	NaN
3.11536	3.3502	0.042528	2.93015	3.32562	-0.061794	NaN	NaN	NaN	NaN	NaN	NaN
3.13223	3.36354	0.04573	2.93966	3.31959	-0.068153	NaN	NaN	NaN	NaN	NaN	NaN
3.14721	3.34541	0.038739	2.94428	3.29134	-0.074228	NaN	NaN	NaN	NaN	NaN	NaN
3.15655	3.33933	0.044537	2.9605	3.35184	-0.06561	NaN	NaN	NaN	NaN	NaN	NaN
3.17507	3.37242	0.046445	2.97485	3.36547	-0.07031	NaN	NaN	NaN	NaN	NaN	NaN
3.19017	3.3649	0.046064	2.99006	3.39459	-0.064675	NaN	NaN	NaN	NaN	NaN	NaN
3.18981	3.34791	0.03586	2.99931	3.38409	-0.064322	NaN	NaN	NaN	NaN	NaN	NaN
3.19035	3.29756	0.021276	3.01406	3.37607	-0.066633	NaN	NaN	NaN	NaN	NaN	NaN
3.20314	3.31452	0.02487	3.01072	3.35623	-0.076426	NaN	NaN	NaN	NaN	NaN	NaN
3.20813	3.29395	0.020466	3.01894	3.34159	-0.088165	NaN	NaN	NaN	NaN	NaN	NaN
3.22281	3.31847	0.025494	3.02319	3.33068	-0.088286	NaN	NaN	NaN	NaN	NaN	NaN
3.22877	3.30876	0.023607	3.04348	3.35491	-0.085349	NaN	NaN	NaN	NaN	NaN	NaN
3.24946	3.35928	0.029777	3.06523	3.39711	-0.082329	NaN	NaN	NaN	NaN	NaN	NaN
3.24979	3.30766	0.005147	3.07606	3.37978	-0.083359	NaN	NaN	NaN	NaN	NaN	NaN
3.26353	3.33092	0.008248	3.09441	3.39395	-0.082395	NaN	NaN	NaN	NaN	NaN	NaN
3.26449	3.30218	0.001802	3.09544	3.38854	-0.082124	NaN	NaN	NaN	NaN	NaN	NaN
3.27043	3.31508	0.002354	3.10515	3.38607	-0.087024	NaN	NaN	NaN	NaN	NaN	NaN
3.27882	3.33417	0.002809	3.11425	3.38617	-0.082148	NaN	NaN	NaN	NaN	NaN	NaN
3.29736	3.36901	0.006144	3.13	3.42474	-0.0853	NaN	NaN	NaN	NaN	NaN	NaN
3.31072	3.39301	0.010214	3.14407	3.45753	-0.078171	NaN	NaN	NaN	NaN	NaN	NaN
3.30781	3.34273	0.003968	3.1476	3.42283	-0.094513	NaN	NaN	NaN	NaN	NaN	NaN
3.32943	3.39814	0.012025	3.16559	3.44034	-0.096647	NaN	NaN	NaN	NaN	NaN	NaN
3.33366	3.37516	0.0066	3.18052	3.45853	-0.097739	NaN	NaN	NaN	NaN	NaN	NaN
3.34836	3.39764	0.011729	3.18902	3.46117	-0.100005	NaN	NaN	NaN	NaN	NaN	NaN
3.36466	3.35894	0.000931	3.19066	3.4233	-0.102131	NaN	NaN	NaN	NaN	NaN	NaN
3.38293	3.38532	0.011827	3.20823	3.46966	-0.097675	NaN	NaN	NaN	NaN	NaN	NaN
3.38406	3.39698	0.001141	3.21289	3.44645	-0.102241	NaN	NaN	NaN	NaN	NaN	NaN
3.39091	3.38813	-0.00959	3.2265	3.48475	-0.095991	NaN	NaN	NaN	NaN	NaN	NaN
3.39698	3.3872	-0.01073	3.24413	3.48482	-0.098494	NaN	NaN	NaN	NaN	NaN	NaN
3.40947	3.40558	-0.00581	3.23961	3.41464	-0.117703	NaN	NaN	NaN	NaN	NaN	NaN
3.41528	3.39084	-0.011786	3.24572	3.39783	-0.124762	NaN	NaN	NaN	NaN	NaN	NaN
3.42658	3.39361	-0.006795	3.26156	3.43578	-0.117705	NaN	NaN	NaN	NaN	NaN	NaN
3.44252	3.397	-0.022108	3.27684	3.4696	-0.119738	NaN	NaN	NaN	NaN	NaN	NaN
3.45453	3.385	-0.030764	3.28678	3.47424	-0.114853	NaN	NaN	NaN	NaN	NaN	NaN
3.46475	3.4072	-0.023767	3.30282	3.51641	-0.115372	NaN	NaN	NaN	NaN	NaN	NaN
3.46753	3.38808	-0.029568	3.3193	3.50161	-0.122441	NaN	NaN	NaN	NaN	NaN	NaN
3.48553	3.42273	-0.024637	3.33432	3.53718	-0.113867	NaN	NaN	NaN	NaN	NaN	NaN
3.49157	3.40796	-0.029702	3.33114	3.52092	-0.121322	NaN	NaN	NaN	NaN	NaN	NaN
3.50162	3.40361	-0.024295	3.34709	3.53792	-0.113392	NaN	NaN	NaN	NaN	NaN	NaN
3.52134	3.43922	-0.026542	3.36267	3.53068	-0.114589	NaN	NaN	NaN	NaN	NaN	NaN
3.53557	3.44055	-0.032901	3.357	3.45378	-0.143903	NaN	NaN	NaN	NaN	NaN	NaN
3.54196	3.39979	-0.048012	3.3603	3.41022	-0.161337	NaN	NaN	NaN	NaN	NaN	NaN
3.54779	3.40601	-0.044174	3.36539	3.40089	-0.16083	NaN	NaN	NaN	NaN	NaN	NaN
3.55661	3.41412	-0.045804	3.37965	3.43086	-0.155052	NaN	NaN	NaN	NaN	NaN	NaN
3.56539	3.41704	-0.040426	3.39608	3.46084	-0.151308	NaN	NaN	NaN	NaN	NaN	NaN
3.57923	3.41937	-0.04169	3.40929	3.48457	-0.156388	NaN	NaN	NaN	NaN	NaN	NaN
3.59519	3.43228	-0.040258	3.4184	3.49213	-0.150992	NaN	NaN	NaN	NaN	NaN	NaN
3.60707	3.41863	-0.040024	3.42787	3.48806	-0.154832	NaN	NaN	NaN	NaN	NaN	NaN
3.62183	3.43312	-0.040532	3.43804	3.49258	-0.149577	NaN	NaN	NaN	NaN	NaN	NaN
3.62353	3.41457	-0.041792	3.44611	3.48707	-0.155529	NaN	NaN	NaN	NaN	NaN	NaN
3.6428	3.4866	-0.041608	3.46842	3.56453	-0.143943	NaN	NaN	NaN	NaN	NaN	NaN
3.65372	3.48403	-0.03816	3.48093	3.55981	-0.151889	NaN	NaN	NaN	NaN	NaN	NaN
3.66051	3.47503	-0.045013	3.48583	3.53529	-0.167224	NaN	NaN	NaN	NaN	NaN	NaN
3.67156	3.48002	-0.039548	3.50007	3.55162	-0.168562	NaN	NaN	NaN	NaN	NaN	NaN
3.68558	3.5109	-0.042359	3.51326	3.57089	-0.164272	NaN	NaN	NaN	NaN	NaN	NaN
3.70092	3.54598	-0.035347	3.51714	3.52378	-0.169977	NaN	NaN	NaN	NaN	NaN	NaN
3.70363	3.51074	-0.052416	3.54	3.57289	-0.1645	NaN	NaN	NaN	NaN	NaN	NaN
3.71423	3.49006	-0.056637	3.54836	3.55753	-0.168279	NaN	NaN	NaN	NaN	NaN	NaN
3.7199	3.47344	-0.06125	3.55031	3.5307	-0.177726	NaN	NaN	NaN	NaN	NaN	NaN
3.7414	3.53769	-0.051964	3.54829	3.49767	-0.19	NaN	NaN	NaN	NaN	NaN	NaN
3.7429	3.53084	-0.060316	3.55521	3.51494	-0.184728	NaN	NaN	NaN	NaN	NaN	NaN
3.76397	3.58118	-0.050765	3.56715	3.49691	-0.195027	NaN	NaN	NaN	NaN	NaN	NaN
3.76276	3.50752	-0.069996	3.58433	3.51873	-0.191685	NaN	NaN	NaN	NaN	NaN	NaN
3.77645	3.49913	-0.073293	3.59847	3.5187	-0.184273	NaN	NaN	NaN	NaN	NaN	NaN
3.77451	3.47476	-0.082145	3.61462	3.55914	-0.187551	NaN	NaN	NaN	NaN	NaN	NaN
3.78349	3.47331	-0.090092	3.62879	3.56164	-0.18934	NaN	NaN	NaN	NaN	NaN	NaN
3.79099	3.42568	-0.100604	3.6429	3.58492	-0.181692	NaN	NaN	NaN	NaN	NaN	NaN
3.80307	3.43703	-0.096873	3.65121	3.57505	-0.183592	NaN	NaN	NaN	NaN	NaN	NaN
3.80681	3.44023	-0.101107	3.66568	3.59715	-0.186858	NaN	NaN	NaN	NaN	NaN	NaN
3.82111	3.456	-0.094203	3.67898	3.62783	-0.182886	NaN	NaN	NaN	NaN	NaN	NaN
3.84705	3.50651	-0.091732	3.67665	3.59105	-0.199582	NaN	NaN	NaN	NaN	NaN	NaN
3.85657	3.51044	-0.091875	3.68259	3.578	-0.206454	NaN	NaN	NaN	NaN	NaN	NaN
3.86735	3.5494	-0.09089	3.68894	3.56449	-0.205262	NaN	NaN	NaN	NaN	NaN	NaN
3.87803	3.56859	-0.0931	3.70725	3.58596	-0.202664	NaN	NaN	NaN	NaN	NaN	NaN
3.8866	3.56586	-0.090484	3.72692	3.62727	-0.194646	NaN	NaN	NaN	NaN	NaN	NaN
3.89451	3.56618	-0.092291	3.7437	3.6376	-0.20087	NaN	NaN	NaN	NaN	NaN	NaN
3.90537	3.54519	-0.098528	3.7398	3.5904	-0.217745	NaN	NaN	NaN	NaN	NaN	NaN
3.91754	3.57071	-0.088264	3.7487	3.58104	-0.223706	NaN	NaN	NaN	NaN	NaN	NaN
3.92458	3.57576	-0.093885	3.75794	3.59131	-0.218162	NaN	NaN	NaN	NaN	NaN	NaN
3.93528	3.57762	-0.088222	3.76843	3.59651	-0.220791	NaN	NaN	NaN	NaN	NaN	NaN
3.94974	3.58783	-0.091568	3.77852	3.5969	-0.216308	NaN	NaN	NaN	NaN	NaN	NaN
3.95647	3.52739	-0.107801	3.78804	3.60018	-0.219404	NaN	NaN	NaN	NaN	NaN	NaN
3.9646	3.49727	-0.11729	3.79575	3.59712	-0.218405	NaN	NaN	NaN	NaN	NaN	NaN
3.98339	3.58362	-0.106318	3.81082	3.61018	-0.215652	NaN	NaN	NaN	NaN	NaN	NaN
3.99263	3.59276	-0.110438	3.82219	3.60175	-0.224446	NaN	NaN	NaN	NaN	NaN	NaN
3.99867	3.5587	-0.11569	3.83112	3.60403	-0.218972	NaN	NaN	NaN	NaN	NaN	NaN
4.01064	3.58921	-0.1107	3.83737	3.59188	-0.220269	NaN	NaN	NaN	NaN	NaN	NaN
4.02449	3.61184	-0.10571	3.856	3.63449	-0.214931	NaN	NaN	NaN	NaN	NaN	NaN
4.03339	3.58621	-0.110917	3.8607	3.5944	-0.240842	NaN	NaN	NaN	NaN	NaN	NaN
4.04622	3.54549	-0.123443	3.87503	3.65119	-0.232739	NaN	NaN	NaN	NaN	NaN	NaN
4.05224	3.5349	-0.124273	3.89262	3.66603	-0.234648	NaN	NaN	NaN	NaN	NaN	NaN
4.06675	3.55173	-0.124677	3.8912	3.6437	-0.231714	NaN	NaN	NaN	NaN	NaN	NaN
4.07815	3.55694	-0.124873	3.89024	3.60644	-0.256746	NaN	NaN	NaN	NaN	NaN	NaN
4.07318	3.52127	-0.126417	3.90198	3.63484	-0.25209	NaN	NaN	NaN	NaN	NaN	NaN
4.09002	3.58483	-0.130323	3.91024	3.62317	-0.25559	NaN	NaN	NaN	NaN	NaN	NaN
4.09648	3.57978	-0.128908	3.9234	3.61145	-0.251936	NaN	NaN	NaN	NaN	NaN	NaN
4.10591	3.61388	-0.124675	3.93283	3.60974	-0.254371	NaN	NaN	NaN	NaN	NaN	NaN
4.12087	3.57994	-0.128752	3.94749	3.61588	-0.250136	NaN	NaN	NaN	NaN	NaN	NaN
4.12612	3.57893	-0.133207	3.96507	3.64387	-0.253957	NaN	NaN	NaN	NaN	NaN	NaN
4.13308	3.5762	-0.132018	3.98216	3.68822	-0.245907	NaN	NaN	NaN	NaN	NaN	NaN
4.1502	3.61796	-0.120938	3.99069	3.64713	-0.260248	NaN	NaN	NaN	NaN	NaN	NaN
4.16493	3.59574	-0.14489	4.00151	3.63347	-0.269152	NaN	NaN	NaN	NaN	NaN	NaN
4.18056	3.6047	-0.141053	4.01222	3.62415	-0.269904	NaN	NaN	NaN	NaN	NaN	NaN
4.19691	3.62296	-0.139148	4.03343	3.65501	-0.259194	NaN	NaN	NaN	NaN	NaN	NaN
4.20381	3.60654	-0.138538	4.03478	3.64036	-0.265892	NaN	NaN	NaN	NaN	NaN	NaN
4.2017	3.62137	-0.137892	4.02932	3.65679	-0.26963	NaN	NaN	NaN	NaN	NaN	NaN
4.21353	3.65679	-0.143147	4.03952	3.67353	-0.273139	NaN	NaN	NaN	NaN	NaN	NaN
4.21995	3.6607	-0.142593	4.04234	3.68292	-0.272283	NaN	NaN	NaN	NaN	NaN	NaN
4.2321	3.67422	-0.140415	4.06979	3.68867	-0.269263	NaN	NaN	NaN	NaN	NaN	NaN
4.24285	3.65756	-0.142456	4.09236	3.69608	-0.264738	NaN	NaN	NaN	NaN	NaN	NaN
4.25319	3.67095	-0.136993	4.10559	3.69559	-0.264495	NaN	NaN	NaN	NaN	NaN	NaN
4.26315	3.68196	-0.141913	4.11385	3.70502	-0.264353	NaN	NaN	NaN	NaN	NaN	NaN
4.26918	3.6498	-0.135906	4.1132	3.68836	-0.266112	NaN	NaN	NaN	NaN	NaN	NaN
4.27449	3.5806	-0.154997	4.11861	3.67751	-0.275986	NaN	NaN	NaN	NaN	NaN	NaN
4.28332	3.55473	-0.160968	4.11917	3.64121	-0.287201	NaN	NaN	NaN	NaN	NaN	NaN
4.30082	3.57028	-0.159739	4.12118	3.63502	-0.288954	NaN	NaN	NaN	NaN	NaN	NaN
4.30723	3.5893	-0.158803	4.15071	3.69734	-0.285791	NaN	NaN	NaN	NaN	NaN	NaN
4.31278	3.56548	-0.164717	4.16409	3.73291	-0.281115	NaN	NaN	NaN	NaN	NaN	NaN
4.31069	3.55714	-0.159795	4.16483	3.69816	-0.288235	NaN	NaN	NaN	NaN	NaN	NaN
4.32826	3.62106	-0.15975	4.17587	3.70101	-0.284559	NaN	NaN	NaN	NaN	NaN	NaN
4.3426	3.62359	-0.159367	4.18944	3.70263	-0.284601	NaN	NaN	NaN	NaN	NaN	NaN
4.35505	3.62502	-0.158135	4.19856	3.69746	-0.28573	NaN	NaN	NaN	NaN	NaN	NaN
4.36549	3.64194	-0.160747	4.2159	3.71014	-0.281674	NaN	NaN	NaN	NaN	NaN	NaN
4.37118	3.62006	-0.164719	4.2311	3.74205	-0.279152	NaN	NaN	NaN	NaN	NaN	NaN
4.37713	3.606	-0.163906	4.24395	3.75089	-0.288567	NaN	NaN	NaN	NaN	NaN	NaN
4.39053	3.63226	-0.157424	4.25076	3.76219	-0.286464	NaN	NaN	NaN	NaN	NaN	NaN
4.40637	3.68312	-0.158171	4.25997	3.76198	-0.276537	NaN	NaN	NaN	NaN	NaN	NaN
4.42102	3.6781	-0.162357	4.26391	3.73501	-0.285066	NaN	NaN	NaN	NaN	NaN	NaN
4.4313	3.68716	-0.154355	4.28131	3.78058	-0.277648	NaN	NaN	NaN	NaN	NaN	NaN
4.44545	3.68777	-0.159216	4.289	3.77129	-0.279183	NaN	NaN	NaN	NaN	NaN	NaN
4.45665	3.66518	-0.163378	4.29411	3.76036	-0.285059	NaN	NaN	NaN	NaN	NaN	NaN
4.46624	3.70661	-0.158377	4.30036	3.76552	-0.28128	NaN	NaN	NaN	NaN	NaN	NaN
4.476	3.70768	-0.152962	4.30397	3.71619	-0.303264	NaN	NaN	NaN	NaN	NaN	NaN
4.48599	3.72035	-0.174268	4.31032	3.71315	-0.301925	NaN	NaN	NaN	NaN	NaN	NaN
4.50483	3.7848	-0.164973	4.32387	3.72585	-0.300452	NaN	NaN	NaN	NaN	NaN	NaN
4.5012	3.68935	-0.174982	4.33709	3.72074	-0.298093	NaN	NaN	NaN	NaN	NaN	NaN
4.51001	3.68146	-0.180087	4.33732	3.7047	-0.302597	NaN	NaN	NaN	NaN	NaN	NaN
4.53278	3.73523	-0.167798	4.34856	3.73167	-0.297252	NaN	NaN	NaN	NaN	NaN	NaN
4.54467	3.72332	-0.166838	4.35448	3.71848	-0.302499	NaN	NaN	NaN	NaN	NaN	NaN
4.54562	3.67279	-0.180305	4.36621	3.73493	-0.297173	NaN	NaN	NaN	NaN	NaN	NaN
4.57246	3.78564	-0.166586	4.37048	3.71259	-0.302539	NaN	NaN	NaN	NaN	NaN	NaN
4.57886	3.77783	-0.173153	4.38468	3.73712	-0.298424	NaN	NaN	NaN	NaN	NaN	NaN
4.58288	3.74403	-0.178283	4.39452	3.68272	-0.314823	NaN	NaN	NaN	NaN	NaN	NaN
4.59673	3.77874	-0.166265	4.39779	3.65355	-0.324973	NaN	NaN	NaN	NaN	NaN	NaN
4.60079	3.75375	-0.172959	4.41686	3.70603	-0.319693	NaN	NaN	NaN	NaN	NaN	NaN
4.6045	3.71734	-0.20091	4.43509	3.75571	-0.306688	NaN	NaN	NaN	NaN	NaN	NaN
4.60459	3.64174	-0.213677	4.44309	3.74673	-0.312074	NaN	NaN	NaN	NaN	NaN	NaN
4.61796	3.66693	-0.209042	4.44704	3.72267	-0.32011	NaN	NaN	NaN	NaN	NaN	NaN
4.63054	3.64947	-0.21058	4.45931	3.73886	-0.316069	NaN	NaN	NaN	NaN	NaN	NaN
4.64595	3.66827	-0.209174	4.46544	3.72536	-0.31969	NaN	NaN	NaN	NaN	NaN	NaN
4.65085	3.66073	-0.20716	4.47973	3.75004	-0.312618	NaN	NaN	NaN	NaN	NaN	NaN
4.67101	3.76261	-0.20324	4.4901	3.73681	-0.313439	NaN	NaN	NaN	NaN	NaN	NaN
4.68542	3.77587	-0.205242	4.50138	3.73601	-0.317084	NaN	NaN	NaN	NaN	NaN	NaN
4.69334	3.77936	-0.209959	4.50971	3.7378	-0.314199	NaN	NaN	NaN	NaN	NaN	NaN
4.70263	3.78104	-0.203068	4.5217	3.73443	-0.319784	NaN	NaN	NaN	NaN	NaN	NaN
4.70529	3.75583	-0.208161	4.53613	3.73273	-0.315743	NaN	NaN	NaN	NaN	NaN	NaN
4.71149	3.76456	-0.209341	4.55179	3.77632	-0.302912	NaN	NaN	NaN	NaN	NaN	NaN
4.71993	3.80292	-0.204629	4.56394	3.80163	-0.292923	NaN	NaN	NaN	NaN	NaN	NaN
4.72868	3.76788	-0.218206	4.57626	3.83855	-0.295468	NaN	NaN	NaN	NaN	NaN	NaN
4.74694	3.73956	-0.222287	4.58134	3.8297	-0.301597	NaN	NaN	NaN	NaN	NaN	NaN
4.76092	3.73133	-0.222613	4.5988	3.87612	-0.288284	NaN	NaN	NaN	NaN	NaN	NaN
4.76157	3.74559	-0.222104	4.60775	3.85778	-0.289747	NaN	NaN	NaN	NaN	NaN	NaN
4.77219	3.72089	-0.22659	4.6067	3.83275	-0.303341	NaN	NaN	NaN	NaN	NaN	NaN
4.78521	3.7472	-0.221524	4.60473	3.79698	-0.315135	NaN	NaN	NaN	NaN	NaN	NaN
4.80175	3.72857	-0.223852	4.61027	3.79586	-0.317732	NaN	NaN	NaN	NaN	NaN	NaN
4.81111	3.72734	-0.223683	4.6201	3.74721	-0.331064	NaN	NaN	NaN	NaN	NaN	NaN
4.82242	3.75146	-0.219658	4.63632	3.7633	-0.330823	NaN	NaN	NaN	NaN	NaN	NaN
4.82936	3.73091	-0.224692	4.64449	3.7833	-0.330077	NaN	NaN	NaN	NaN	NaN	NaN
4.83355	3.75344	-0.219682	4.65805	3.80752	-0.332922	NaN	NaN	NaN	NaN	NaN	NaN
4.84607	3.74732	-0.221038	4.67408	3.83429	-0.32738	NaN	NaN	NaN	NaN	NaN	NaN
4.85506	3.72532	-0.227595	4.6746	3.77476	-0.335158	NaN	NaN	NaN	NaN	NaN	NaN
4.86307	3.71602	-0.228727	4.69099	3.82414	-0.328388	NaN	NaN	NaN	NaN	NaN	NaN
4.86312	3.71787	-0.228266	4.70115	3.79462	-0.334302	NaN	NaN	NaN	NaN	NaN	NaN
4.88544	3.75976	-0.222951	4.72258	3.85216	-0.322299	NaN	NaN	NaN	NaN	NaN	NaN
4.8971	3.7592	-0.21925	4.73266	3.82289	-0.324515	NaN	NaN	NaN	NaN	NaN	NaN
4.91534	3.78459	-0.219327	4.74072	3.80901	-0.346231	NaN	NaN	NaN	NaN	NaN	NaN
4.91903	3.81854	-0.217062	4.74912	3.81589	-0.348376	NaN	NaN	NaN	NaN	NaN	NaN
4.91863	3.79057	-0.224141	4.76221	3.82169	-0.348349	NaN	NaN	NaN	NaN	NaN	NaN
4.93164	3.81254	-0.221105	4.76911	3.82554	-0.345924	NaN	NaN	NaN	NaN	NaN	NaN
4.94309	3.79261	-0.223671	4.78418	3.8249	-0.349371	NaN	NaN	NaN	NaN	NaN	NaN
4.94739	3.79242	-0.223139	4.79379	3.81749	-0.348469	NaN	NaN	NaN	NaN	NaN	NaN
4.95629	3.79349	-0.216827	4.80753	3.80968	-0.350657	NaN	NaN	NaN	NaN	NaN	NaN
4.97545	3.8004	-0.220792	4.81984	3.837	-0.343992	NaN	NaN	NaN	NaN	NaN	NaN
4.98857	3.81786	-0.217651	4.82574	3.80327	-0.354564	NaN	NaN	NaN	NaN	NaN	NaN
5.00104	3.81268	-0.215662	4.84054	3.83975	-0.345013	NaN	NaN	NaN	NaN	NaN	NaN
5.01264	3.79543	-0.217199	4.84376	3.84357	-0.349336	NaN	NaN	NaN	NaN	NaN	NaN
5.01903	3.80518	-0.215402	4.84708	3.82808	-0.353253	NaN	NaN	NaN	NaN	NaN	NaN
5.0254	3.80642	-0.223339	4.85001	3.81562	-0.353904	NaN	NaN	NaN	NaN	NaN	NaN
5.02075	3.76859	-0.2251	4.87557	3.8676	-0.338562	NaN	NaN	NaN	NaN	NaN	NaN
5.02963	3.7975	-0.220665	4.88265	3.81897	-0.348112	NaN	NaN	NaN	NaN	NaN	NaN
5.0516	3.85209	-0.215779	4.89971	3.84292	-0.343615	NaN	NaN	NaN	NaN	NaN	NaN
5.06269	3.87631	-0.214133	4.90544	3.80223	-0.366623	NaN	NaN	NaN	NaN	NaN	NaN
5.06919	3.84715	-0.22925	4.90874	3.77164	-0.369382	NaN	NaN	NaN	NaN	NaN	NaN
5.07496	3.82352	-0.233529	4.92437	3.83921	-0.365949	NaN	NaN	NaN	NaN	NaN	NaN
5.08388	3.81803	-0.24015	4.93577	3.87213	-0.360249	NaN	NaN	NaN	NaN	NaN	NaN
5.09276	3.78813	-0.237431	4.93704	3.82678	-0.3704	NaN	NaN	NaN	NaN	NaN	NaN
5.09766	3.75029	-0.241351	4.95367	3.87356	-0.362991	NaN	NaN	NaN	NaN	NaN	NaN
5.11104	3.7623	-0.237008	4.96487	3.89256	-0.364074	NaN	NaN	NaN	NaN	NaN	NaN
5.12445	3.78041	-0.24075	4.97823	3.9123	-0.358365	NaN	NaN	NaN	NaN	NaN	NaN
5.13462	3.76596	-0.237234	4.97884	3.85269	-0.366926	NaN	NaN	NaN	NaN	NaN	NaN
5.14264	3.7254	-0.250759	4.99085	3.85722	-0.359499	NaN	NaN	NaN	NaN	NaN	NaN
5.14911	3.71056	-0.257901	4.99936	3.83588	-0.366279	NaN	NaN	NaN	NaN	NaN	NaN
5.1545	3.69099	-0.26529	5.01182	3.88842	-0.359134	NaN	NaN	NaN	NaN	NaN	NaN
5.17602	3.75954	-0.25508	5.02112	3.90109	-0.36094	NaN	NaN	NaN	NaN	NaN	NaN
5.18992	3.77019	-0.252809	5.03417	3.92397	-0.354698	NaN	NaN	NaN	NaN	NaN	NaN
5.20687	3.7696	-0.255492	5.03648	3.84111	-0.376013	NaN	NaN	NaN	NaN	NaN	NaN
5.21183	3.76751	-0.25561	5.0586	3.89332	-0.376278	NaN	NaN	NaN	NaN	NaN	NaN
5.21428	3.78728	-0.254574	5.07546	3.91759	-0.374638	NaN	NaN	NaN	NaN	NaN	NaN
5.21995	3.76575	-0.260227	5.07249	3.89167	-0.377217	NaN	NaN	NaN	NaN	NaN	NaN
5.22561	3.77469	-0.259182	5.07792	3.89892	-0.3797	NaN	NaN	NaN	NaN	NaN	NaN
5.23637	3.75742	-0.261104	5.08519	3.92037	-0.378281	NaN	NaN	NaN	NaN	NaN	NaN
5.24947	3.78975	-0.258994	5.07814	3.83739	-0.385281	NaN	NaN	NaN	NaN	NaN	NaN
5.26041	3.80537	-0.249189	5.09027	3.86976	-0.378307	NaN	NaN	NaN	NaN	NaN	NaN
5.2693	3.76739	-0.255308	5.10168	3.87577	-0.381572	NaN	NaN	NaN	NaN	NaN	NaN
5.28258	3.76912	-0.267937	5.12221	3.88092	-0.376091	NaN	NaN	NaN	NaN	NaN	NaN
5.29153	3.74266	-0.272747	5.13196	3.85934	-0.377602	NaN	NaN	NaN	NaN	NaN	NaN
5.30433	3.72522	-0.273965	5.14793	3.87638	-0.376384	NaN	NaN	NaN	NaN	NaN	NaN
5.3247	3.79891	-0.271662	5.15452	3.86049	-0.378324	NaN	NaN	NaN	NaN	NaN	NaN
5.32437	3.7953	-0.270007	5.16263	3.86606	-0.376873	NaN	NaN	NaN	NaN	NaN	NaN
5.32647	3.7915	-0.275282	5.17331	3.8714	-0.381084	NaN	NaN	NaN	NaN	NaN	NaN
5.33	3.76672	-0.276876	5.18474	3.91805	-0.360964	NaN	NaN	NaN	NaN	NaN	NaN
5.35285	3.77046	-0.27934	5.20487	3.9601	-0.353815	NaN	NaN	NaN	NaN	NaN	NaN
5.375	3.78737	-0.271774	5.20791	3.91788	-0.377229	NaN	NaN	NaN	NaN	NaN	NaN
5.38074	3.78891	-0.271348	5.22136	3.92749	-0.375346	NaN	NaN	NaN	NaN	NaN	NaN
5.38171	3.80354	-0.269849	5.23443	3.92774	-0.376705	NaN	NaN	NaN	NaN	NaN	NaN
5.38763	3.78585	-0.27567	5.24138	3.93038	-0.37398	NaN	NaN	NaN	NaN	NaN	NaN
5.39169	3.7884	-0.276783	5.25225	3.93106	-0.377153	NaN	NaN	NaN	NaN	NaN	NaN
5.40149	3.7495	-0.286826	5.25899	3.92547	-0.37561	NaN	NaN	NaN	NaN	NaN	NaN
5.41219	3.75376	-0.286914	5.26828	3.93831	-0.373386	NaN	NaN	NaN	NaN	NaN	NaN
5.43231	3.791	-0.287954	5.27063	3.91042	-0.381282	NaN	NaN	NaN	NaN	NaN	NaN
5.44704	3.84337	-0.277096	5.28516	3.97381	-0.371691	NaN	NaN	NaN	NaN	NaN	NaN
5.45671	3.85082	-0.267542	5.29349	3.98891	-0.375715	NaN	NaN	NaN	NaN	NaN	NaN
5.46908	3.91583	-0.269541	5.30385	4.00525	-0.368592	NaN	NaN	NaN	NaN	NaN	NaN
5.47749	3.90016	-0.270864	5.31258	3.99551	-0.37434	NaN	NaN	NaN	NaN	NaN	NaN
5.48688	3.92421	-0.268464	5.32208	3.99786	-0.369625	NaN	NaN	NaN	NaN	NaN	NaN
5.49345	3.90818	-0.272176	5.33157	3.99558	-0.373871	NaN	NaN	NaN	NaN	NaN	NaN
5.49667	3.87627	-0.2793	5.34288	3.97567	-0.366352	NaN	NaN	NaN	NaN	NaN	NaN
5.50449	3.85424	-0.292624	5.35198	3.98319	-0.377156	NaN	NaN	NaN	NaN	NaN	NaN
5.51279	3.84542	-0.293011	5.36651	3.9952	-0.37167	NaN	NaN	NaN	NaN	NaN	NaN
5.52197	3.88198	-0.288629	5.37132	3.9962	-0.380881	NaN	NaN	NaN	NaN	NaN	NaN
5.53319	3.85518	-0.288927	5.37869	3.96677	-0.389552	NaN	NaN	NaN	NaN	NaN	NaN
5.54463	3.91277	-0.282032	5.38374	3.93488	-0.394953	NaN	NaN	NaN	NaN	NaN	NaN
5.56182	3.94639	-0.280543	5.39699	3.95797	-0.39012	NaN	NaN	NaN	NaN	NaN	NaN
5.5709	3.9043	-0.281085	5.40217	3.94383	-0.39363	NaN	NaN	NaN	NaN	NaN	NaN
5.57484	3.85439	-0.291897	5.41754	3.99264	-0.384624	NaN	NaN	NaN	NaN	NaN	NaN
5.59047	3.89736	-0.281714	5.42744	3.99866	-0.391318	NaN	NaN	NaN	NaN	NaN	NaN
5.59607	3.84169	-0.293182	5.44465	4.01598	-0.38756	NaN	NaN	NaN	NaN	NaN	NaN
5.61575	3.87817	-0.280203	5.45298	4.01622	-0.383692	NaN	NaN	NaN	NaN	NaN	NaN
5.62138	3.8632	-0.29747	5.46019	4.01098	-0.391195	NaN	NaN	NaN	NaN	NaN	NaN
5.62851	3.80399	-0.311114	5.47061	4.01438	-0.385695	NaN	NaN	NaN	NaN	NaN	NaN
5.62917	3.80935	-0.30617	5.47933	4.01092	-0.390554	NaN	NaN	NaN	NaN	NaN	NaN
5.63809	3.86204	-0.300791	5.48887	4.00709	-0.386373	NaN	NaN	NaN	NaN	NaN	NaN
5.64709	3.88989	-0.29982	5.50443	4.03554	-0.380716	NaN	NaN	NaN	NaN	NaN	NaN
5.66113	3.86347	-0.309134	5.50589	3.9655	-0.404795	NaN	NaN	NaN	NaN	NaN	NaN
5.67868	3.87954	-0.302321	5.51554	3.95245	-0.410382	NaN	NaN	NaN	NaN	NaN	NaN
5.67981	3.86425	-0.308073	5.52115	3.92807	-0.415553	NaN	NaN	NaN	NaN	NaN	NaN
5.69479	3.90069	-0.299511	5.53754	3.98947	-0.408533	NaN	NaN	NaN	NaN	NaN	NaN
5.70698	3.88603	-0.299887	5.54677	4.00854	-0.408861	NaN	NaN	NaN	NaN	NaN	NaN
5.72242	3.90006	-0.299622	5.56093	4.0335	-0.402471	NaN	NaN	NaN	NaN	NaN	NaN
5.72516	3.88946	-0.298702	5.565	4.01971	-0.407048	NaN	NaN	NaN	NaN	NaN	NaN
5.73276	3.89327	-0.302084	5.57903	4.01133	-0.409082	NaN	NaN	NaN	NaN	NaN	NaN
5.73813	3.86541	-0.306093	5.59258	4.04361	-0.404655	NaN	NaN	NaN	NaN	NaN	NaN
5.75363	3.8873	-0.305743	5.60865	4.06125	-0.399768	NaN	NaN	NaN	NaN	NaN	NaN
5.76775	3.90097	-0.298382	5.61818	4.03703	-0.400539	NaN	NaN	NaN	NaN	NaN	NaN
5.77981	3.92115	-0.29729	5.63192	4.01094	-0.411193	NaN	NaN	NaN	NaN	NaN	NaN
5.79023	3.90401	-0.29671	5.63013	3.99214	-0.416087	NaN	NaN	NaN	NaN	NaN	NaN
5.80473	3.90623	-0.298521	5.63937	3.96313	-0.429318	NaN	NaN	NaN	NaN	NaN	NaN
5.80455	3.89431	-0.297137	5.6509	4.00042	-0.420044	NaN	NaN	NaN	NaN	NaN	NaN
5.80913	3.90828	-0.306335	5.65745	3.9777	-0.429114	NaN	NaN	NaN	NaN	NaN	NaN
5.81385	3.92751	-0.307256	5.66542	3.9585	-0.428537	NaN	NaN	NaN	NaN	NaN	NaN
5.81705	3.91096	-0.317429	5.6838	4.02086	-0.424327	NaN	NaN	NaN	NaN	NaN	NaN
5.8231	3.86519	-0.324418	5.68852	4.05317	-0.418286	NaN	NaN	NaN	NaN	NaN	NaN
5.84104	3.89055	-0.317891	5.69357	4.05646	-0.423678	NaN	NaN	NaN	NaN	NaN	NaN
5.8516	3.91238	-0.317204	5.69687	3.99622	-0.435455	NaN	NaN	NaN	NaN	NaN	NaN
5.85555	3.88452	-0.324146	5.70474	3.97551	-0.446227	NaN	NaN	NaN	NaN	NaN	NaN
5.86525	3.91634	-0.313808	5.71279	3.98449	-0.43877	NaN	NaN	NaN	NaN	NaN	NaN
5.87243	3.92659	-0.30725	5.72704	3.98471	-0.44377	NaN	NaN	NaN	NaN	NaN	NaN
5.88645	3.95057	-0.298277	5.73327	3.95245	-0.450875	NaN	NaN	NaN	NaN	NaN	NaN
5.9022	3.93866	-0.305555	5.75194	3.994	-0.44109	NaN	NaN	NaN	NaN	NaN	NaN
5.9222	3.96291	-0.295984	5.76432	3.99903	-0.444891	NaN	NaN	NaN	NaN	NaN	NaN
5.93136	3.9377	-0.314539	5.77749	4.00633	-0.439307	NaN	NaN	NaN	NaN	NaN	NaN
5.93806	3.91122	-0.315564	5.78022	3.97432	-0.445506	NaN	NaN	NaN	NaN	NaN	NaN
5.94326	3.89796	-0.323518	5.79616	4.05833	-0.435514	NaN	NaN	NaN	NaN	NaN	NaN
5.93921	3.8911	-0.321633	5.80046	4.04083	-0.438312	NaN	NaN	NaN	NaN	NaN	NaN
5.93944	3.87752	-0.331181	5.81234	4.05203	-0.437252	NaN	NaN	NaN	NaN	NaN	NaN
5.95246	3.8234	-0.348032	5.82803	4.05521	-0.436082	NaN	NaN	NaN	NaN	NaN	NaN
5.97419	3.88426	-0.329339	5.8409	4.04657	-0.435798	NaN	NaN	NaN	NaN	NaN	NaN
5.98869	3.88095	-0.326384	5.83561	4.03171	-0.445918	NaN	NaN	NaN	NaN	NaN	NaN
6.0115	3.95039	-0.313447	5.83757	4.03462	-0.445716	NaN	NaN	NaN	NaN	NaN	NaN
6.01166	3.95075	-0.321571	5.84865	4.04411	-0.440529	NaN	NaN	NaN	NaN	NaN	NaN
6.0156	3.96423	-0.319504	5.85282	4.01055	-0.452844	NaN	NaN	NaN	NaN	NaN	NaN
6.02259	3.93897	-0.324297	5.85855	4.01117	-0.45297	NaN	NaN	NaN	NaN	NaN	NaN
6.03477	3.96019	-0.318543	5.86714	4.01895	-0.462089	NaN	NaN	NaN	NaN	NaN	NaN
6.0439	3.94815	-0.323309	5.88516	4.03582	-0.455907	NaN	NaN	NaN	NaN	NaN	NaN
[truncated: 1,938 more rows]

## Sheet: Control_afterConvection_Ind32_xyzpts
pt1_X	pt1_Y	pt1_Z	pt2_X	pt2_Y	pt2_Z	pt3_X	pt3_Y	pt3_Z	pt4_X	pt4_Y	pt4_Z
[truncated: 2,537 more rows]

[truncated: 65 more sheets: Control_afterConvection_Ind28_xyzpts, Control_ind01_xyzpts, Control_ind02_xyzpts, Control_ind03_xyzpts, Control_ind04_xyzpts, Control_ind05_xyzpts, Control_ind06_xyzpts, Control_ind07_xyzpts, Control_ind08_xyzpts, Control_ind09_xyzpts, Control_ind10_xyzpts, Control_ind11_xyzpts, Control_ind12_xyzpts, Control_ind13_xyzpts, Control_ind14_xyzpts, Control_ind15_xyzpts, Control_ind16_xyzpts, Control_ind17_xyzpts, Control_ind18_xyzpts, Convection_ind19_xyzpts …]
